# Supplementary material for: Five-plex isotope dimethyl labeling for quantitative proteomics
Source: Royal Society of Chemistry journal article supplement (doi:10.1039/c3cc47998f), 2013-12-09
Supplement: c3cc47998f.xlsx [file c3cc47998f.xlsx]

## Sheet: proteome_1_1_1_1_1(peptides)
Sequence	Missed cleavages	Mass	Proteins	Leading razor protein	Charges	PEP	Score	Ratio #3/#1 normalized	Ratio #5/#1 normalized	Ratio #5/#3 normalized	Ratio #2/#1 normalized	Ratio #4/#1 normalized	Ratio #4/#2 normalized
QEIIEMDQAIK	0	1316.66	IPI00973846;IPI00642206;IPI00418983;IPI00472654	IPI00973846	2	0.0038496	76.228	0.60451	0.46169	0.78274	0.75326	0.051289	0.068286
GAAWVSETGK	0	1004.49	IPI00419901;IPI00878891;IPI00719141;IPI00896460;IPI00165990;IPI00910894	IPI00419901	2	0.0033144	84.213	0.83582	0.64087	0.62594	1.1541	0.098932	0.086481
EATPYPAIIK	0	1101.61	IPI00220373	IPI00220373	2	0.053061	43.308	0.26102	0.25419	0.93341	0.24219	0.23292	0.9561
IVQVAINGIENIIRIGEQEAK	0	2306.3	IPI00303292	IPI00303292	2	0.041176	62.847	0.32639	0.30213	0.94901	0.26929	0.26247	0.97297
IVCDIIENK	0	1102.57	IPI00329672	IPI00329672	2	0.027994	55.567	0.37331	0.25702	0.93355	0.27181	0.28075	0.91985
EIEFYIRK	0	1096.59	IPI00216587;IPI00645201	IPI00216587	2	0.0045762	96.711	0.81929	0.3466	0.43923	0.71956	0.33718	0.48025
VIPRIHDVICK	0	1348.76	IPI00783271	IPI00783271	2,3	3.8489e-11	134.2	0.39873	0.37321	0.99428	0.44427	0.37456	0.95393
IPGGEINPGEDEVEGIK	0	1751.86	IPI00646917	IPI00646917	2	9.308e-07	133.52	0.3867	0.35812	1.0379	0.64973	0.37482	0.589
ETERFVSEMIQK	0	1495.73	IPI00873506;IPI00942902;IPI00644409	IPI00873506	2	2.491e-08	122.7	0.73636	0.30692	0.41244	0.98726	0.37645	0.39151
IIETITQQIQAK	0	1384.79	IPI00006052	IPI00006052	2	5.2912e-65	170.66	0.72019	0.7384	1.0196	0.56246	0.38835	0.60238
SVARIAK	0	743.465	IPI00299573;IPI00397676;IPI00642454	IPI00299573	2	0.012204	79.469	0.87027	0.36962	0.49574	0.46179	0.4199	0.91516
SSTPEEVKK	1	1003.52	IPI00012011;IPI00909841	IPI00012011	2	5.1395e-12	166.07	0.93664	0.44808	0.47576	0.449	0.42179	0.87288
SSTPEEVK	0	875.424	IPI00012011;IPI00909841	IPI00012011	2	0.0013471	101.43	0.82228	0.48805	0.52875	0.42014	0.43109	1.1337
ISSTWEGIQAGK	0	1275.65	IPI00744692	IPI00744692	2	0.00013305	125.82	0.57244	0.50837	0.88298	0.92664	0.44116	0.49245
VTAQDVRK	0	915.514	IPI00219365	IPI00219365	2	0.014088	70.908	0.67334	0.50149	0.68766	0.81339	0.46458	0.62532
YVPIADVK	0	903.507	IPI00030131;IPI00791301;IPI00873716;IPI00181409;IPI00795693;IPI00795286	IPI00030131	2	0.0053631	95.531	0.33907	0.28698	0.83473	0.66616	0.50205	0.76398
IQESHPEIRRVYFNK	0	1915.01	IPI00009368	IPI00009368	3	0.01515	59.155	0.63205	0.54673	0.94111	0.80175	0.5075	0.60873
SIGTQPPKK	1	954.55	IPI00908873;IPI00216654;IPI00292387	IPI00908873	2	3.0602e-08	171.56	0.85599	0.51768	0.64289	0.40368	0.50904	1.3834
SCNCIIIK	0	1006.49	IPI00465248;IPI00759806	IPI00465248	2	0.00062454	124.92	0.88599	0.44283	0.52152	0.5513	0.50938	0.94381
VEKPDTK	0	815.439	IPI00790342;IPI00329389;IPI00867533;IPI00797034;IPI00880154	IPI00790342	2	0.06211	50.127	0.78828	0.54584	0.75552	0.64774	0.51063	0.90154
AAVTPGKK	1	770.465	IPI00604620;IPI00183526;IPI00917429;IPI00916991;IPI00916036	IPI00604620	2	0.030165	63.565	0.8475	0.5621	0.69502	0.62775	0.52395	0.88195
VAVATPAKK	1	883.549	IPI00604620;IPI00183526;IPI00917429;IPI00916991;IPI00916036	IPI00604620	2	0.0058093	87.308	0.70382	0.50783	0.72408	0.6796	0.5295	0.8385
AVEHINK	0	809.44	IPI00465248	IPI00465248	2	0.00010752	127.12	0.87618	0.64942	0.72063	0.62663	0.53332	0.86557
RIAQAVEK	0	913.535	IPI00218474;IPI00909949;IPI00942494	IPI00218474	2	0.053715	48.794	0.67279	0.64448	0.72442	0.69279	0.54587	0.84911
SIAQAEAEK	0	945.477	IPI00014898;IPI00186711;IPI00398002;IPI00398778;IPI00398777;IPI00398779;IPI00398775;IPI00420096;IPI00398776	IPI00014898	2	0.00046379	131.28	0.88018	0.50175	0.53768	0.70423	0.5467	0.82035
ATTKPPPAK	0	909.528	IPI00908873;IPI00216654;IPI00292387	IPI00908873	2	0.0097996	71.614	0.85133	0.55404	0.6847	0.61593	0.56446	0.89481
AETAANRICK	0	1132.57	IPI00013808;IPI00969112;IPI00908458;IPI00908776;IPI00973960;IPI00032137;IPI00936352;IPI00019884;IPI00921118;IPI00759776;IPI00013508;IPI00909239	IPI00013808	2	4.2069e-35	229.17	0.826	0.9023	1.1269	0.92086	0.56774	0.83642
VVVRNINK	0	940.582	IPI00013871;IPI00943207	IPI00013871	2	0.094371	35.356	0.79208	0.55948	0.71101	0.66533	0.57505	0.85535
KPPTDEEIK	0	1055.55	IPI00020021;IPI00909779;IPI00942944	IPI00020021	2	0.057085	44.309	0.83667	0.55914	0.71313	0.66519	0.58512	0.97366
SAQWRTVEGAIK	0	1344.71	IPI00009960;IPI00554469;IPI00470829;IPI00926611;IPI00940432;IPI00925553;IPI00910079;IPI00916765	IPI00009960	2	0.00059439	96.604	0.75675	0.51203	0.65625	0.48443	0.58541	1.1379
ARAAERAIAEEK	0	1313.71	IPI00455473;IPI00739902;IPI00655578	IPI00455473	2	0.00015247	124.42	0.92989	0.83606	0.96778	1.0648	0.58572	0.53331
SIQAERNKPTK	0	1270.7	IPI00004860;IPI00973800	IPI00004860	2,3	3.073e-05	127.56	1.0104	0.61939	0.68936	0.61953	0.58583	1.0324
KPPPAPEGK	0	919.513	IPI00185919	IPI00185919	2	0.039104	51.268	0.72346	0.64417	0.83074	0.71547	0.58881	0.73062
EETKEDAEEKQ	2	1334.58	IPI00414127;IPI00878075;IPI00879160	IPI00414127	2	0.02461	85.813	0.80734	0.71216	0.90629	0.80855	0.58892	0.90563
SNFAEAIAAHK	0	1157.58	IPI00010796;IPI00878551;IPI00911004	IPI00010796	2	0.0003348	110.92	0.99747	0.54241	0.52175	0.52056	0.58981	1.1204
MVATTKPK	0	874.495	IPI00908873;IPI00216654;IPI00292387	IPI00908873	2	0.00050149	113.71	0.86622	0.66591	0.75952	0.47239	0.59068	0.81091
NMACVQRTIMNIGGIAVARDDGIFSGDPNWFPK	0	3649.76	IPI00647915;IPI00550363;IPI00644531	IPI00647915	3	0.0017547	58.342	1.0174	0.87069	0.97284	1.3264	0.59085	0.44893
STPVIVSATTK	0	1102.62	IPI00237884;IPI00867627;IPI00940222	IPI00237884	2	0.00054472	108.56	0.978	0.57854	0.57408	0.62292	0.5922	0.94586
AAVHIEGK	0	823.455	IPI00307162;IPI00291175	IPI00307162	2	0.0071157	79.906	0.75142	0.82268	1.088	0.7628	0.59602	0.99039
KIADSDQASK	1	1061.54	IPI00872028;IPI00292771;IPI00006196;IPI00030136	IPI00872028	2	0.0066563	77.64	0.98151	1.4468	1.5775	0.905	0.59807	0.81924
KGDSSAEEIK	1	1062.52	IPI00465361;IPI00397611	IPI00465361	2	0.0037092	84.289	0.80933	0.72498	0.89122	0.67373	0.60003	0.89252
SQVFSTAADGQTQVEIK	0	1807.9	IPI00007765;IPI00922694	IPI00007765	2	1.6387e-13	167.92	0.81185	0.59569	0.72285	0.77982	0.60024	0.76445
KMDQPPQAK	1	1041.53	IPI00002966	IPI00002966	2	0.0039533	88.495	0.86458	0.68607	0.73122	0.66969	0.60025	0.84166
VVREAVK	0	799.492	IPI00010157;IPI00916229;IPI00916889	IPI00010157	2	0.017111	73.931	0.81423	0.66813	0.77732	0.68313	0.60158	0.86738
SIVFHRK	0	885.518	IPI00792352;IPI00796462;IPI00795671;IPI00643041;IPI00795109	IPI00792352	2	0.00059486	108.24	0.98194	0.60508	0.60065	0.56913	0.60277	1.1803
EEAEKPEREAK	0	1314.64	IPI00026154;IPI00943074;IPI00792916;IPI00829824	IPI00026154	2	0.0018415	86.014	0.83893	0.62802	0.77792	0.71784	0.60521	0.87753
SEEEQSSSSVKK	1	1323.62	IPI00477313;IPI00216592;IPI00909232;IPI00759822;IPI00911096;IPI00759596;IPI00868835	IPI00477313	2	0.020005	64.64	0.81684	0.63515	0.71496	0.60308	0.60543	1.0627
DPAAVTESK	0	916.45	IPI00220687;IPI00152441;IPI00552772	IPI00220687	2	0.017615	61.56	0.83276	0.67933	0.7687	0.70599	0.60543	0.78073
SGFEGMFTK	0	1002.45	IPI00221325	IPI00221325	2	0.0026452	88.056	1.0073	0.69444	0.66772	0.61806	0.61004	1.039
RASPSKPASAPASRSGSK	0	1740.92	IPI00880007;IPI00396171;IPI00888475;IPI00878314;IPI00220113;IPI00927819;IPI00411375;IPI00924603;IPI00743873;IPI00878651;IPI00043863;IPI00927173	IPI00880007	3	0.039897	50.827	0.72835	0.84679	1.2461	0.85331	0.61289	0.79032
KVDQPPEAK	1	1010.54	IPI00514983;IPI00939163;IPI00513743;IPI00218993;IPI00908988	IPI00514983	2	0.0044702	93.096	0.77281	0.59569	0.73695	0.64929	0.61381	1.0083
DQDSRSAPEPK	0	1228.57	IPI00012079;IPI00942600;IPI00908588;IPI00798302;IPI00910983	IPI00012079	2	0.0041932	75.739	0.85342	0.61786	0.69536	0.78593	0.62047	0.77464
IIRIMEEIMSEK	0	1490.78	IPI00017617;IPI00798375	IPI00017617	2	0	252.42	0.99157	0.91081	0.92321	0.97337	0.62331	0.63948
EVRQIAEDFIK	0	1346.72	IPI00017617;IPI00798375	IPI00017617	2	0.00054862	108.35	0.83681	1.0172	1.1766	0.82291	0.62445	0.77279
FIVYVANFDEK	0	1343.68	IPI00031461;IPI00940148;IPI00640006;IPI00645255;IPI00513929	IPI00031461	2	0.00033118	119.74	1.2639	1.1109	0.94163	0.91012	0.62536	0.69892
SVQPQSHKPQPTRK	0	1616.87	IPI00185919;IPI00643027;IPI00411690	IPI00185919	3	0.0012696	86.288	0.73131	0.67039	0.66352	0.56917	0.62555	1.209
KFAETQPK	1	947.508	IPI00000875;IPI00937615;IPI00738381	IPI00000875	2	0.0036454	95.358	0.79888	0.72161	0.83187	0.778	0.62687	0.92035
QIPTIIIFQGGK	0	1313.77	IPI00329596;IPI00873607;IPI00556619	IPI00329596	2	0.0022882	83.617	0.65867	0.66064	1.0257	0.64926	0.6271	1.2351
SAVTTVVNPK	0	1014.57	IPI00217563	IPI00217563	2	0.00065929	117.02	1.093	0.67542	0.59371	0.93419	0.62762	0.80232
SCIIHQFTEK	0	1261.61	IPI00291928;IPI00646415	IPI00291928	2	0.0015411	93.839	0.92918	0.65419	0.68185	0.56049	0.62807	1.1196
KTTDTASVQNEAK	1	1391.69	IPI00867509;IPI00943173;IPI00798401;IPI00797709	IPI00867509	2	3.3135e-10	160.78	0.90459	0.76774	0.5901	0.7015	0.62965	0.78328
SVVTSIFGVK	0	1035.6	IPI00644127;IPI00514082;IPI00514385	IPI00644127	2	0.0021436	91.549	0.95535	0.48991	0.55468	0.59288	0.62972	1.0986
STEIIIRK	0	958.581	IPI00171611;IPI00465070;IPI00219038;IPI00909530;IPI00455457;IPI00974438;IPI00216402;IPI00419884;IPI00477080;IPI00793280;IPI00798360	IPI00171611	2	3.9062e-08	163.9	0.99827	0.6294	0.5896	0.60965	0.62974	1.1167
IIVQRASVGAK	0	1140.7	IPI00031556;IPI00830039	IPI00031556	2	1.6223e-176	210.35	0.62453	0.57602	0.90023	0.72877	0.63136	0.88828
SIDEMEK	0	850.374	IPI00010740;IPI00216613	IPI00010740	2	0.00022984	116.73	0.9924	0.5758	0.59283	0.723	0.63143	0.98454
EEFEHQQK	0	1073.48	IPI00003865;IPI00880019	IPI00003865	2	1.6261e-08	157.68	0.83005	0.67281	0.8411	0.74999	0.63279	0.8324
SGPSVPVSVQTK	0	1184.64	IPI00170786;IPI00910819;IPI00739738	IPI00170786	2	0.00020882	104.24	1.0572	0.59146	0.5418	0.59971	0.63398	1.1019
SCAHDWVYE	0	1165.45	IPI00604590;IPI00795292;IPI00026260;IPI00029091;IPI00790856	IPI00604590	2	0.0017928	102.51	1.1216	0.63067	0.62279	0.88294	0.63411	0.63769
AKKDDTDDEIAK	2	1347.65	IPI00020984;IPI00941747;IPI00964308;IPI00477719;IPI00383227;IPI00964865;IPI00967621;IPI00964989;IPI00965725	IPI00020984	2	5.1203e-26	225.97	0.76773	0.65232	0.77954	0.74453	0.6347	0.80088
VIEDSDIKK	1	1045.57	IPI00003362	IPI00003362	2	0.0054133	82.749	0.88435	0.59267	0.7688	0.83298	0.635	0.79131
RGIHSAIDASQTPDVVFASIIAAFSK	0	2700.42	IPI00215901;IPI00218988;IPI00922165;IPI00921960	IPI00215901	3,4	9.5411e-13	122.47	1.073	1.3886	1.271	2.4741	0.63591	0.35124
EFEFSQIPIK	0	1236.64	IPI00295098;IPI00797747	IPI00295098	2	3.008e-40	155.11	3.7833	1.3152	0.36404	2.1838	0.63599	0.6385
SDGAPASDSKPGSSEAAPSSK	0	1931.87	IPI00299024;IPI00908521	IPI00299024	2,3	3.9614e-58	245.1	0.95983	0.63041	0.70865	0.60239	0.63641	1.0336
VEPSHDASK	0	968.456	IPI00333541;IPI00302592;IPI00644576;IPI00553169	IPI00333541	2	0.049216	47.187	0.79692	0.72923	0.9348	0.78104	0.63738	0.76735
EDGVRGIAK	0	943.509	IPI00215777;IPI00790115;IPI00022202;IPI00788624;IPI00793177	IPI00215777	2	0.0072133	76.221	0.85908	0.68607	0.81552	0.67162	0.63884	1.0204
GVRVIEK	0	799.492	IPI00470573;IPI00005159	IPI00470573	2	0.072594	46.426	0.83645	0.65414	0.79812	0.68424	0.63969	0.95128
RFQNVAK	0	861.482	IPI00027230;IPI00939289;IPI00556538	IPI00027230	2	0.075749	45.312	0.86662	0.83188	1.0198	0.66219	0.64123	1.018
SINIITAFQK	0	1133.64	IPI00024911	IPI00024911	2	4.6085e-06	153.34	0.97426	0.592	0.63781	0.63918	0.64129	1.0805
KGPGIAVQSGDK	1	1155.62	IPI00013174;IPI00556514	IPI00013174	2	0.00086219	98.337	0.76741	0.78281	0.92316	0.84668	0.64186	0.82316
KPAAATVTK	0	885.528	IPI00217465	IPI00217465	2	0.010649	70.1	0.76984	0.63065	0.84071	0.68642	0.64198	0.94081
CIEIFSEIAEDK	0	1452.68	IPI00414676;IPI00515119;IPI00640129;IPI00746291	IPI00414676	2	3.3929e-179	210.15	0.91596	0.73308	0.81102	0.77465	0.64346	0.8694
IAYAVRGNK	0	990.561	IPI00008943;IPI00019918;IPI00939593;IPI00155054;IPI00556368	IPI00008943	2	0.0011947	100.02	0.89532	0.71266	0.82075	0.77199	0.64448	0.86063
GAAPTPPGK	0	794.429	IPI00815713;IPI00815944;IPI00815731;IPI00965339;IPI00914061;IPI00165041;IPI00941770;IPI00969501;IPI00298696;IPI00555853;IPI00909120;IPI00965583	IPI00815713	2	3.3045e-08	149.82	0.91748	0.73434	0.84367	0.8094	0.64546	0.86653
GATPAPPGK	0	794.429	IPI00815713;IPI00815944;IPI00815731;IPI00965339;IPI00914061;IPI00165041;IPI00941770;IPI00969501;IPI00298696;IPI00555853;IPI00966633	IPI00815713	2	0.00066679	105.78	0.91748	0.73434	0.84367	0.8094	0.64546	0.86653
TYAICGAIRRMGESDDSIIRIAK	0	2595.33	IPI00017448;IPI00937239	IPI00017448	3	0.039104	52.185	1.098	1.1828	1.1256	0.7416	0.64578	0.70183
RIEEIPIIK	0	1109.68	IPI00029012	IPI00029012	2	1.2802e-06	115.78	0.748	0.69678	0.93769	1.6599	0.64596	0.44528
NRPEDYQGGRTGEAIVDAAISAIRQIVK	0	3026.59	IPI00299571;IPI00644989	IPI00299571	3,5	0.00038016	72.532	1.0993	1.0826	1.0178	1.0875	0.64728	1.1762
VGRPTASK	0	814.466	IPI00022145;IPI00844197	IPI00022145	2	0.016168	68.224	0.79336	0.68208	0.80475	0.76639	0.64782	0.78253
AYEKPPEK	0	960.492	IPI00005198	IPI00005198	2	0.0039956	86.011	1.0176	0.7299	0.76436	0.77837	0.64947	1.0387
VVRSVHYCPATK	0	1415.73	IPI00013214;IPI00940786	IPI00013214	3	0.0013147	90.697	0.84458	0.76275	0.94952	0.85682	0.65105	0.82538
AQREQAIRAAK	0	1240.7	IPI00793696;IPI00306332;IPI00946221;IPI00795548	IPI00793696	2,3	2.456e-13	181.68	0.8093	0.63065	0.83497	0.79479	0.65116	0.88368
VIADNVK	0	757.433	IPI00465028;IPI00797270;IPI00796633;IPI00451401	IPI00465028	2	0.019362	70.912	0.78548	0.68632	0.80321	0.65092	0.65323	1.0086
STTTGHIIYK	0	1119.59	IPI00396485;IPI00472724;IPI00025447;IPI00940393;IPI00431701;IPI00431441;IPI00014424;IPI00180730	IPI00396485	2	8.8587e-16	194.06	1.1178	0.60819	0.53959	0.52398	0.65349	1.357
SITPSRIIQNIK	0	1368.81	IPI00220271	IPI00220271	2	3.5172e-13	165.66	0.85501	0.57665	0.62764	0.65853	0.6535	1.0104
RTAEHEAAQQDIQSK	0	1710.83	IPI00328753;IPI00909030;IPI00783726;IPI00337736	IPI00328753	3	5.2504e-07	137.46	0.99386	0.87618	0.91706	0.83464	0.65395	0.94734
KKPEEEGSAHQDTAEK	1	1782.84	IPI00102661;IPI00008477	IPI00102661	3	0.00054849	101.2	0.82301	0.67988	0.98232	1.004	0.65746	0.66102
WSTAVEFCK	0	1126.51	IPI00382926;IPI00152418;IPI00216550;IPI00784169;IPI00783145;IPI00292069;IPI00974056;IPI00974349;IPI00973820	IPI00382926	2	0.021308	60.102	0.90825	0.64616	0.73326	0.78493	0.65794	0.87373
EKPGPEDK	0	898.44	IPI00441498	IPI00441498	2	0.010543	78.334	0.86037	0.6848	0.83422	0.72499	0.65893	0.98964
KIQPAQTAAK	1	1054.61	IPI00007289;IPI00290380	IPI00007289	2	0.0020229	99.283	0.79739	0.69887	0.83364	0.89159	0.65909	0.82901
SSPSVKPAVDPAAAK	0	1423.77	IPI00387130;IPI00025333	IPI00387130	2	0.00024958	109.79	1.1329	0.64118	0.6487	0.73633	0.66115	1.1751
AIVATPGKK	1	883.549	IPI00604620;IPI00183526;IPI00917429;IPI00916991;IPI00916036	IPI00604620	2	7.3894e-112	194.9	0.82262	0.67413	0.84195	0.7157	0.66125	0.93354
AKPAEAPAAAAPK	0	1191.66	IPI00420108;IPI00384122;IPI00033034;IPI00384016	IPI00420108	2,3	9.2118e-22	194.3	0.8369	0.7493	0.85319	0.84918	0.66286	0.81834
KESEAVEWQQK	1	1360.66	IPI00219365;IPI00922115	IPI00219365	2	0.00063917	107.17	0.81192	0.65491	0.74543	0.87725	0.66421	0.79761
INFAVASRK	0	1004.58	IPI00025252;IPI00847663	IPI00025252	2	5.166e-41	155.06	0.77712	0.64303	0.82372	0.71945	0.66555	0.9555
DAHIIVESK	0	1010.54	IPI00783271	IPI00783271	2	0.0028189	86.624	0.96759	0.7929	0.75489	0.68328	0.66677	0.96331
TIEEDEEEIFK	0	1380.63	IPI00414127;IPI00878075;IPI00878950;IPI00878611;IPI00878440	IPI00414127	2	8.7405e-13	171.62	0.90058	0.72679	0.84247	0.77555	0.66717	0.90178
IYSNRAACYTK	0	1345.64	IPI00013894;IPI00479946;IPI00908463	IPI00013894	2	8.4212e-13	172.13	0.95272	0.83706	0.89457	0.39539	0.66747	0.99821
GVATNWIRAK	0	1114.62	IPI00880028;IPI00792395;IPI00927647;IPI00470467;IPI00903331;IPI00910178;IPI00908675;IPI00973067	IPI00880028	2	3.997e-12	192.12	0.75009	0.73621	1.0394	0.81287	0.66774	0.81798
SPVAVQSTK	0	915.503	IPI00011416	IPI00011416	2	0.0065636	77.379	1.0184	0.66307	0.67567	0.62449	0.66776	1.1773
STFVIDEFK	0	1084.54	IPI00000875;IPI00937615;IPI00738381;IPI00909534	IPI00000875	2	5.418e-06	157.96	1.1594	0.64146	0.59916	0.60325	0.6697	1.1434
DNNIIGK	0	772.408	IPI00003865;IPI00037070;IPI00939595;IPI00880019;IPI00902596;IPI00844564;IPI00007702	IPI00003865	2	0.014368	75.38	0.96602	0.72889	0.72518	0.72103	0.6701	1.0235
NNTVTPGGKPNK	0	1225.64	IPI00029731;IPI00793102	IPI00029731	2,3	2.3778e-13	176.18	1.1483	0.77073	0.7195	0.55127	0.67123	1.5075
SVIMERIK	0	974.558	IPI00005648;IPI00646058;IPI00300631;IPI00942963;IPI00925702;IPI00872777;IPI00942551;IPI00941773;IPI00910872	IPI00005648	2	5.1469e-06	161.92	1.0076	0.6592	0.58008	0.57972	0.67131	1.1399
KVGDDIAK	1	844.465	IPI00024933	IPI00024933	2	0.025881	70.908	0.7141	0.53457	0.73396	0.67107	0.67131	0.97071
GSPRPQAPK	0	936.514	IPI00908873;IPI00216654;IPI00292387	IPI00908873	2	3.4779e-06	141.2	0.98505	0.90088	0.88505	0.87318	0.6722	0.9262
RAESMIQQADK	0	1275.62	IPI00216694;IPI00947227;IPI00947454	IPI00216694	2	0.00047459	112.44	0.91224	0.74998	0.8598	0.95162	0.67253	0.76198
DKPAVAPATK	0	996.56	IPI00940872;IPI00759542;IPI00759754;IPI00023283;IPI00179357;IPI00759637;IPI00759613	IPI00940872	2	0.061131	40.589	0.98286	0.65075	0.72154	0.60669	0.67324	1.3003
EIEVGGGRK	0	943.509	IPI00013415;IPI00893703	IPI00013415	2	0.00052916	109.71	0.91003	0.75646	0.81353	0.76422	0.67345	0.90699
KAPGCVISNPDQK	1	1412.71	IPI00029795;IPI00218035;IPI00941207;IPI00218037;IPI00218041;IPI00218039	IPI00029795	3	0.0039465	79.492	0.70015	0.73224	1.0291	1.0971	0.67385	0.5811
TIQEMQQK	0	1004.5	IPI00013808;IPI00969112;IPI00908776	IPI00013808	2	0.0042354	84.615	0.92356	0.61785	0.75832	0.68538	0.67426	1.0112
SCFICMVCK	0	1203.49	IPI00442073	IPI00442073	2	4.5116e-06	140.14	1.026	0.59188	0.57039	0.58753	0.67535	1.1634
SESVPPVTDWAWYK	0	1663.79	IPI00218019;IPI00019906;IPI00394877	IPI00218019	2	2.9805e-10	154.47	0.9577	0.74096	0.77755	0.69528	0.67566	1.0271
ENREAQMAAK	0	1146.55	IPI00479997;IPI00921996	IPI00479997	2	0.0045116	78.655	0.728	0.53409	0.64888	0.71765	0.67612	0.91079
IAASGEGGIQEISGHFENQK	0	2071	IPI00794221;IPI00295624;IPI00003406;IPI00967040	IPI00794221	3	2.0417e-12	155.2	0.71188	0.70192	1.0072	1.0309	0.67691	0.68885
SNMGHPEPASGIAAIAK	0	1649.82	IPI00026781	IPI00026781	2	1.3583e-08	140.46	1.1039	0.70436	0.65213	0.588	0.68013	1.1164
FIDTTSK	0	810.412	IPI00550021;IPI00651660;IPI00877635;IPI00219335;IPI00943250	IPI00550021	2	0.062313	50.703	0.84295	0.763	1.0008	0.7047	0.68064	0.95842
SAVEDEGIK	0	946.461	IPI00304925;IPI00845339;IPI00909073;IPI00911039	IPI00304925	2	9.0031e-06	140.45	0.9769	0.68732	0.70093	0.6546	0.6807	1.0772
AVTTPGKK	1	800.476	IPI00604620;IPI00183526;IPI00917429;IPI00916991;IPI00916036	IPI00604620	2	1.4025e-05	153.78	0.78332	0.6091	0.7448	0.65285	0.68252	1.0936
SDIDEIVIVGGSTRIPK	0	1797.98	IPI00003362	IPI00003362	2	4.7444e-19	177.58	0.9776	0.65584	0.66593	0.72268	0.68301	1.0207
ARVITEEEK	0	1073.57	IPI00465361;IPI00397611	IPI00465361	2	3.1339e-08	150.61	0.82666	0.73893	0.78538	0.89853	0.68326	0.75077
IIVDGRGK	0	856.513	IPI00018465;IPI00552072;IPI00952607	IPI00018465	2	0.00018291	143.61	0.9511	0.84277	0.78468	2.0658	0.68524	0.3389
FISAIVSSVDK	0	1164.64	IPI00009342	IPI00009342	2	6.7283e-13	174.84	1.1285	0.81774	0.84257	1.2598	0.68541	0.65598
GVAINFVTEEDK	0	1320.66	IPI00409717;IPI00328328;IPI00030296	IPI00409717	2	8.215e-05	117.07	0.74074	0.75293	0.97719	0.72397	0.68704	0.95627
SFEDRVGTIK	0	1150.6	IPI00306825;IPI00221178;IPI00399265;IPI00399267;IPI00743469;IPI00399266;IPI00399268	IPI00306825	2	0.0001474	134.3	0.93618	0.61304	0.64803	0.60088	0.68713	1.0841
EVSTYIK	0	838.444	IPI00396485;IPI00472724;IPI00025447;IPI00879622;IPI00878103;IPI00180730	IPI00396485	2	0.00045325	113.7	0.88513	0.69863	0.92543	0.81562	0.68818	0.90726
TGCNVIIIQK	0	1144.63	IPI00302927;IPI00893358;IPI00921414	IPI00302927	2	0.0013168	99.522	0.87715	0.64681	0.8218	0.70382	0.68865	1.1171
EFHINESGDPSSK	0	1445.64	IPI00301311;IPI00896523;IPI00844040;IPI00917753;IPI00072377	IPI00072377	2	1.9522e-14	179.5	1.0665	0.61282	0.57475	0.61547	0.68898	1.1574
SIYYITGESK	0	1159.58	IPI00414676;IPI00455599;IPI00515119;IPI00640129	IPI00414676	2	4.4e-08	152.7	1.0024	0.6406	0.67356	0.65119	0.68918	1.1098
GEHPGISIGDVAK	0	1278.66	IPI00419258;IPI00645948;IPI00644653;IPI00018755;IPI00903004;IPI00742929;IPI00022796;IPI00879051	IPI00419258	2	5.5731e-05	119.39	1.0039	0.74867	0.69575	0.71332	0.69074	1.0246
TATAVAHCK	0	957.47	IPI00221092;IPI00450975	IPI00221092	2	0.0012543	111.61	1.0958	0.70383	0.65366	0.62133	0.69085	1.227
RATVVESSEK	0	1104.58	IPI00220642;IPI00910779	IPI00220642	2	3.4173e-08	155.48	0.91095	0.7263	0.79476	0.86781	0.69141	0.92675
RNTTIPTK	0	929.529	IPI00003865;IPI00037070;IPI00939595;IPI00902596;IPI00007702	IPI00003865	2	0.0019371	104.2	0.92502	0.67813	0.7407	0.65494	0.69238	1.1293
IGHPAPNFK	0	979.524	IPI00000874;IPI00640741;IPI00641244	IPI00000874	2	0.0021636	96.253	0.97586	0.82603	0.85433	0.74463	0.69269	0.98574
EAQEISQNSAIK	0	1316.66	IPI00015953;IPI00477179	IPI00015953	2	0.00058998	96.866	1.0094	1.0696	1.0623	1.0402	0.69295	0.78657
AVDSQIIPK	0	969.549	IPI00790342;IPI00329389;IPI00867533	IPI00790342	2	0.037039	52.725	0.90497	0.77012	0.85145	0.86478	0.69531	0.86122
SSEQIIATIK	0	1088.61	IPI00004968	IPI00004968	2	0.018163	58.674	1.0534	0.63438	0.64522	0.69382	0.69583	1.0391
SSVIIAQQTDTSDPEK	0	1717.84	IPI00294879	IPI00294879	2	1.4523e-59	252.47	1.0907	0.68508	0.64144	0.6316	0.69639	1.1475
SDIGEVIIVGGMTRMPK	0	1801.94	IPI00007765;IPI00922694	IPI00007765	2	9.334e-27	199.65	1.0371	0.6649	0.6636	0.62856	0.69651	1.1027
AINVQEEK	0	929.482	IPI00871535;IPI00879810;IPI00844215;IPI00843765	IPI00871535	2	0.00021929	141.48	0.86041	0.72737	0.79575	0.73413	0.69853	0.94025
SIISNIDEVKK	1	1244.7	IPI00938079;IPI00246058;IPI00942087;IPI00943244	IPI00938079	2	0.00011637	122.45	0.99247	0.67182	0.64767	0.71487	0.69857	0.99251
SFYPEEVSSMVITK	0	1615.78	IPI00003865;IPI00037070;IPI00939595;IPI00910870	IPI00003865	2	5.9141e-15	173.25	0.97417	0.70658	0.73378	0.64903	0.69904	1.1247
RSYVTMTATK	0	1156.59	IPI00015897;IPI00885057	IPI00015897	2	0.0026802	88.187	0.89614	0.83985	0.94402	0.74574	0.70008	0.86575
SIARVITVINQTQK	0	1569.92	IPI00412607;IPI00550247	IPI00412607	2,3	2.2522e-66	201.3	0.95789	0.66102	0.68138	0.66668	0.70247	1.1285
TDAPQPDVKEEEEEKEEEK	2	2258.01	IPI00020984;IPI00941747	IPI00020984	3	8.4225e-15	172.57	0.79694	0.78219	1.3197	1.2976	0.7026	0.48458
EIIPVIISAMK	0	1212.72	IPI00307162;IPI00291175;IPI00384973	IPI00307162	2	1.401e-08	167.18	1.0453	1.1011	1.0821	0.99403	0.70269	0.71105
ASIREIAIGSNK	0	1257.7	IPI00550069	IPI00550069	2	1.4489e-20	139.46	0.86565	1.2453	1.4041	0.83493	0.70274	0.85243
KINPENSK	1	928.498	IPI00550746	IPI00550746	2	0.013603	81.972	0.78878	0.63411	0.8691	0.82607	0.70276	0.96165
AAEVYTRIK	0	1049.59	IPI00013290;IPI00939776;IPI00885081	IPI00013290	2	0.0012868	111.06	0.64001	0.68099	1.0014	0.76305	0.70364	0.92141
RCQYVTEK	0	1082.52	IPI00796333;IPI00465439;IPI00922665;IPI00418262;IPI00922081	IPI00796333	2	3.3345e-08	155.07	0.90119	0.67239	0.81432	0.80505	0.70414	0.88466
EFHTTGIAWSK	0	1275.62	IPI00008274;IPI00639931;IPI00939159;IPI00646869;IPI00645789;IPI00514858	IPI00008274	1,2	2.4175e-48	135.43	1.0581	0.67816	0.60901	0.58191	0.70431	1.2384
SAEAAAEATK	0	947.456	IPI00551024	IPI00551024	2	0.00057213	105.2	0.98471	0.59212	0.54073	0.58459	0.70445	0.99129
EAIERIK	0	857.497	IPI00008219	IPI00008219	2	0.049417	54.157	0.79406	0.72267	0.90579	0.76096	0.70451	0.98165
SQEMVHIVNK	0	1183.6	IPI00305064;IPI00956122;IPI00827658;IPI00827650;IPI00418465;IPI00828064;IPI00828192;IPI00827795;IPI00828056;IPI00419219;IPI00827893;IPI00827982;IPI00827937;IPI00854669;IPI00297160;IPI00922478;IPI00918020;IPI00974500	IPI00305064	2	5.6982e-05	146.16	1.0703	0.61011	0.61442	0.65246	0.70517	1.1304
WAATRWAK	0	988.524	IPI00555744;IPI00925323;IPI00815843	IPI00555744	2	0.067316	44.349	1.0177	0.70006	0.83031	1.0147	0.7054	0.69843
AIMAAEDK	0	847.411	IPI00940084;IPI00216135;IPI00296039;IPI00970818;IPI00216134;IPI00384369;IPI00018853	IPI00940084	2	0.022628	84.498	0.91607	0.78717	0.84147	0.85687	0.7055	0.87307
ITFDEYRNISQK	0	1512.76	IPI00024095;IPI00964070	IPI00024095	2	1.0885e-05	136.93	0.79032	0.65021	0.82851	0.83063	0.70611	0.90392
IDDVVNTR	0	930.477	IPI00302927;IPI00893358	IPI00302927	2	0.0017408	99.139	0.98863	1.1188	1.0671	0.78553	0.70621	0.78368
WINENAVEK	0	1101.55	IPI00012007;IPI00935818	IPI00012007	2	0.0022084	91.658	0.92762	0.73602	0.83792	0.85893	0.70624	0.81806
KFVETPGQK	1	1032.56	IPI00009032;IPI00916802;IPI00916922	IPI00009032	2	0.049865	53.751	0.96709	0.80877	0.81722	0.95394	0.70658	0.92868
ICEGFNEVIK	0	1207.59	IPI00009466;IPI00007673	IPI00009466	2	0.0025153	83.397	0.95779	0.72626	0.83994	0.88187	0.70704	0.8562
SIVEIADTVPK	0	1170.65	IPI00939304;IPI00793443;IPI00937471;IPI00514622	IPI00939304	2	0.00027455	113.61	1.0466	0.70561	0.66256	0.63428	0.70728	1.1327
STESIQANVQRIK	0	1472.79	IPI00465361;IPI00397611	IPI00465361	2	1.5074e-29	214.81	1.0193	0.7062	0.68713	0.5989	0.70846	1.2195
FGHGRFQTMEEK	0	1465.68	IPI00550021;IPI00651660;IPI00877635	IPI00550021	2	1.0885e-19	203.61	1.2837	0.62796	0.51875	0.51903	0.70864	1.2798
GTQCARIVEK	0	1160.6	IPI00219953;IPI00908752;IPI00514929;IPI00514049	IPI00219953	2	1.2847e-25	207.29	0.78205	0.70291	0.88318	0.65177	0.70868	1.0349
EIPFGDK	0	804.402	IPI00844264;IPI00973794;IPI00470891;IPI00873244	IPI00844264	2	0.0084247	81.784	0.98298	0.82395	0.83824	0.85742	0.70996	0.80597
AETPTAAEDDNEGDKK	1	1689.73	IPI00299254	IPI00299254	3	1.2899e-12	159.52	0.97497	0.99517	0.92756	0.8624	0.71026	0.812
VAFVSRGTQIISSGSDGIVK	0	2020.1	IPI00477971;IPI00643087;IPI00549223	IPI00477971	3	0.0044461	66.152	0.63537	0.70107	1.3296	0.76802	0.71069	1.0843
SIIINTFYSNK	0	1298.69	IPI00555565	IPI00555565	2	2.2027e-08	163.78	0.94226	0.68557	0.68135	0.82299	0.71114	0.93424
SIYGERFPDENFK	0	1600.75	IPI00646304;IPI00791367	IPI00646304	2	2.7091e-09	154.1	0.9863	0.64987	0.67081	0.72199	0.71163	0.9982
DAVAICEIFNWIEK	0	1706.83	IPI00645898;IPI00607814;IPI00793375	IPI00645898	2	7.6425e-10	152.89	0.87037	0.71884	1.0721	1.0546	0.71164	0.93856
APPARPVK	0	834.508	IPI00008575;IPI00479209;IPI00385834;IPI00082310	IPI00008575	2	0.0056422	89.296	0.89271	0.81543	0.90478	0.80583	0.71202	0.82319
VGDQAQRRVMK	0	1286.69	IPI00028091	IPI00028091	2	0.043482	46.844	0.81564	0.96583	1.0554	0.89407	0.71251	0.77275
IIEVDDERK	0	1115.58	IPI00021840;IPI00640929	IPI00021840	2	3.5156e-18	205.83	0.98355	0.88543	0.89507	0.91872	0.71331	0.86614
EGKPIIK	0	783.485	IPI00186290	IPI00186290	2	0.07275	46.37	0.9469	0.65372	0.67039	0.65227	0.71369	1.0922
TIHPDIGTDK	0	1095.56	IPI00947127;IPI00217966;IPI00607708;IPI00939286;IPI00908791;IPI00910754;IPI00952964;IPI00795075	IPI00947127	2	0.00057237	110.38	1.0072	0.74916	0.7165	0.58764	0.71492	1.1293
SSRAEVRTHYDPPRK	0	1797.92	IPI00479191;IPI00013881;IPI00908896;IPI00964535;IPI00026230;IPI00940955;IPI00974526;IPI00923539	IPI00479191	3	0.039693	51.009	1.1249	0.6943	0.61444	0.58882	0.71502	1.3931
IQAFIRANK	0	1059.62	IPI00009342	IPI00009342	2	1.0653e-05	133.86	0.89002	0.74525	0.83776	0.91295	0.71519	0.82089
KFGNPGEK	1	875.45	IPI00017617;IPI00798375	IPI00017617	2	0.095064	45.161	0.96752	0.65146	0.70676	0.65968	0.71601	1.119
EQIAQAVARIK	0	1225.71	IPI00022228;IPI00894287;IPI00443983;IPI00894047;IPI00893650	IPI00022228	2	7.5687e-09	162.26	0.85698	0.70269	0.81832	0.81136	0.71601	0.9297
DIIIACRINQK	0	1342.74	IPI00783271	IPI00783271	2	2.6215e-08	155.11	0.78179	0.7559	0.95488	0.87932	0.71614	0.89531
VDCTANTNTCNK	0	1396.57	IPI00025252;IPI00790740;IPI00893541	IPI00025252	2	0.00051128	101.53	0.97023	0.78539	1.0513	0.9847	0.7162	0.85059
AEAIASAIASTK	0	1131.61	IPI00018260;IPI00909723	IPI00018260	2	2.3234e-06	150.21	1.1042	0.92791	0.85912	0.97543	0.71654	0.85511
WKPGSIASHVK	0	1208.67	IPI00026689;IPI00955014;IPI00073536	IPI00026689	2,3	0.045926	45.879	0.75347	0.70057	0.77928	0.68407	0.71738	0.98207
RIQQITEEIGRIK	0	1582.92	IPI00742682	IPI00742682	3	1.0125e-05	122.39	0.92189	0.89392	0.97124	0.71254	0.71762	0.87657
KPFSQHVRK	0	1125.64	IPI00790342;IPI00329389;IPI00867533;IPI00789282	IPI00790342	2,3	0.0040243	89.047	0.851	0.73297	0.85495	0.75525	0.71775	0.9675
FTVPMIK	0	834.467	IPI00644712;IPI00893062;IPI00889791	IPI00644712	2	0.0027056	97.602	1.1943	1.1814	0.93303	0.77546	0.71777	0.8991
FISPQDTFEAIK	0	1394.71	IPI00550308	IPI00550308	2	0.0024413	94.122	1.1038	0.84693	0.79261	1.0068	0.7178	0.73761
SGSPAVIAFAK	0	1046.58	IPI00291755	IPI00291755	2	0.016473	58.274	1.0817	0.74254	0.68431	0.73684	0.71892	0.88155
TAENFRAICTGEK	0	1495.71	IPI00003927;IPI00026519;IPI00552916;IPI00657779	IPI00003927	2	0.036636	52.071	1.0633	0.80124	0.78406	0.64113	0.71896	1.0954
GDDIQAIKK	1	986.54	IPI00477313;IPI00216592;IPI00909232;IPI00759822;IPI00911096	IPI00477313	2	2.4595e-05	128.27	0.87636	0.77066	0.91718	0.71293	0.71943	1.066
SRIMGIEAIK	0	1116.63	IPI00010720;IPI00964855;IPI00965722;IPI00964998;IPI00966038;IPI00966991	IPI00010720	2	0.00022114	117.52	1.0341	0.69704	0.66766	0.69392	0.71951	1.1212
SQQSEVTRIIDGK	0	1459.76	IPI00955848;IPI00010402;IPI00746352;IPI00514669	IPI00955848	2	2.7662e-06	143.05	1.0165	0.66481	0.6665	0.64441	0.71956	1.1117
NDKSEEEQSSSSVK	1	1552.69	IPI00477313;IPI00216592;IPI00909232;IPI00759822;IPI00911096;IPI00759596	IPI00477313	2	1.3015e-05	135.14	0.74041	0.65194	0.77199	0.62232	0.7198	1.1297
TIAPTWEEISK	0	1273.66	IPI00171438;IPI00939560	IPI00171438	2	0.00027971	113.38	1.0241	0.85922	0.86481	0.8708	0.71995	1.1097
RVGTHIRAK	0	1036.63	IPI00216237	IPI00216237	2	0.018673	63.216	0.94123	0.70979	0.78571	0.63939	0.72003	1.2359
AGVAPIQVK	0	881.533	IPI00333541;IPI00302592;IPI00644576;IPI00553169;IPI00552416	IPI00333541	2	0.034307	53.968	0.84444	0.69307	0.82413	0.79909	0.72007	0.91993
SIKDEDVIQK	1	1173.62	IPI00644037;IPI00100656	IPI00644037	2	0.03639	111.63	1.0646	0.57747	0.58398	0.65479	0.72074	1.0286
SNEDQSMGNWQIK	0	1535.67	IPI00216952;IPI00021405;IPI00216953;IPI00644087;IPI00514320;IPI00514817;IPI00965833;IPI00910241;IPI00965461	IPI00216952	2	1.7377e-31	225.86	1.027	0.69449	0.65424	0.66202	0.72212	1.176
TTDTASVQNEAK	0	1263.59	IPI00867509;IPI00943173;IPI00798401;IPI00797709	IPI00867509	2	6.5767e-14	133.15	1.0331	0.78021	0.7543	0.7236	0.7222	1.2655
SSIVIRFVK	0	1047.64	IPI00016339;IPI00789439;IPI00017344;IPI00023510;IPI00927674;IPI00908835;IPI00924852;IPI00797838;IPI00927292;IPI00927919;IPI00063302;IPI00002919	IPI00016339	2	0.052713	46.001	1.2012	1.0078	0.80559	0.61297	0.72261	1.167
ANPAAARAPSAK	0	1123.61	IPI00815713;IPI00815944;IPI00815731;IPI00965339;IPI00914061;IPI00165041;IPI00941770;IPI00969501;IPI00298696;IPI00555853;IPI00909120	IPI00815713	2	8.421e-09	161.48	0.87362	0.7014	0.81042	0.74862	0.72337	0.96447
SIFHYRQYSAGK	0	1455.73	IPI00889534;IPI00011062;IPI00397498	IPI00889534	2	1.1882e-27	206.69	1.0493	0.68798	0.66437	0.78986	0.72343	0.99786
EIERIQK	0	914.519	IPI00553153	IPI00553153	2	2.0475e-05	133.6	0.86987	0.558	0.67316	0.80334	0.72389	0.89621
WDAWNEIK	0	1060.5	IPI00922055;IPI00921830;IPI00965476;IPI00218836;IPI00966070;IPI00815745;IPI00010182	IPI00922055	2	0.012523	72.928	0.95683	0.69961	0.74264	0.79077	0.72398	0.91946
SEVATITAAGK	0	1046.56	IPI00478410;IPI00395769	IPI00478410	2	4.4052e-08	148.28	1.1427	0.63828	0.58092	0.54057	0.72453	1.3067
MREIIARK	0	1015.6	IPI00007765;IPI00922694	IPI00007765	2	0.0077353	84.615	0.79064	0.070622	0.089745	0.93698	0.72462	0.84954
SVEAAAEISAK	0	1074.56	IPI00550020	IPI00550020	2	0.00084052	96.64	1.0825	0.70846	0.6258	0.66672	0.72475	1.0679
EAFSIFDK	0	955.465	IPI00916600;IPI00916768;IPI00794543;IPI00075248;IPI00386621;IPI00915959;IPI00216984	IPI00916600	2	1.1459e-18	189.7	0.88493	0.78705	0.8602	0.8942	0.72502	0.86592
DTEIAEEIIQWFIQEEK	0	2120.03	IPI00024067;IPI00455383;IPI00385931	IPI00024067	2,3	1.3934e-15	165.9	0.76546	0.70855	1.0156	0.9736	0.72514	0.73621
MVPTSDK	0	776.374	IPI00186290	IPI00186290	2	0.016505	74.415	1.0316	0.96163	0.95111	0.66345	0.72541	1.1098
SAFPHIQDAQVK	0	1339.69	IPI00298961;IPI00893013	IPI00298961	2	0.0076963	71.176	0.93232	0.85834	0.93292	0.64999	0.72629	1.1203
NPVIAQK	0	768.449	IPI00013894;IPI00479946;IPI00908463	IPI00013894	2	0.003609	94.407	0.83335	0.68836	0.85336	0.74715	0.72655	0.97575
RMAIIMAEMSRIVRGGSGTK	0	2163.14	IPI00307162;IPI00291175;IPI00910496;IPI00909711	IPI00307162	3	0.08217	37.624	1.0477	1.2169	0.97556	0.96692	0.72693	0.77729
STNPGISIGDVAK	0	1257.66	IPI00376756;IPI00217477;IPI00640781;IPI00643317;IPI00411540;IPI00888596;IPI00374293;IPI00941696	IPI00376756	2	0.00012317	121.56	1.1745	0.65482	0.59357	0.5579	0.72713	1.1876
AARKSAPATGGVK	1	1212.69	IPI00171611;IPI00465070;IPI00455457	IPI00171611	2,3	7.7654e-08	160.38	0.72891	0.72204	0.95485	0.8755	0.72736	0.84706
QQHVIETIIGK	0	1264.71	IPI00010720;IPI00964079;IPI00965269;IPI00964855;IPI00965722;IPI00940257	IPI00010720	2	1.3963e-08	167.2	0.99059	0.66314	0.59494	0.65591	0.72749	1.1741
GVAGNPMVK	0	871.459	IPI00744319;IPI00965550;IPI00217053;IPI00868973;IPI00868764;IPI00868717;IPI00942375	IPI00744319	2	0.0030795	84.476	0.86851	0.67645	0.82801	0.85444	0.72782	0.88892
AARVIIEK	0	898.56	IPI00221093;IPI00791157	IPI00221093	2	3.2078e-08	152.63	0.88254	0.73338	0.84643	0.89181	0.72876	0.8317
SVIEIIPEINEK	0	1382.77	IPI00783271;IPI00917975	IPI00783271	2	0.0002789	115.34	0.97594	0.73748	0.76996	0.74804	0.72882	1.0569
EEASGSSVTAEEAKK	1	1521.72	IPI00220834	IPI00220834	2	3.0845e-103	318.46	0.7823	0.74868	0.89578	0.79142	0.73008	0.9067
ANAQAAAIYK	0	1019.54	IPI00027341;IPI00916783;IPI00908511;IPI00972980	IPI00027341	2	0.030249	52.725	0.90859	0.69442	0.87426	0.79685	0.73011	0.97548
ISSPRGGMK	0	931.491	IPI00871827;IPI00472171;IPI00030179;IPI00794746	IPI00871827	2	0.00030724	116.05	0.94067	0.81292	0.75947	0.71171	0.7303	0.91684
IHIVQVVCK	0	1094.63	IPI00010896;IPI00877596	IPI00010896	2	0.00022163	133.86	0.79246	0.68321	0.89048	0.88873	0.73054	0.80198
TKDEPQRETIK	1	1343.7	IPI00215997;IPI00657796;IPI00795937;IPI00908644;IPI00556460	IPI00215997	2,3	0.037768	87.298	0.8724	0.76253	0.86192	0.63096	0.73181	1.2225
IGIHEDSQNRKK	1	1423.75	IPI00382470;IPI00784295;IPI00604607	IPI00382470	3	0.0027187	87.298	0.88778	0.69422	0.82478	0.89776	0.73194	0.88454
APGFGDNRK	0	960.478	IPI00784154;IPI00917575;IPI00880053	IPI00784154	2	0.0025212	89.08	0.97464	0.74537	0.79475	0.85665	0.73203	0.81575
AAATAEEPDPK	0	1098.52	IPI00017763;IPI00941463;IPI00798071;IPI00788840;IPI00789437	IPI00017763	2	0.00036748	117.98	0.94675	0.80547	0.85257	0.86284	0.73254	0.8354
MASEREGSGSSGTGEQK	0	1696.73	IPI00007765;IPI00922694	IPI00007765	2,3	2.5455e-06	131.82	0.82928	0.87164	1.0314	0.8562	0.73304	0.85922
KPITRAEVGEK	0	1226.7	IPI00030131;IPI00791301;IPI00795693	IPI00030131	2	0.065291	38.238	0.89748	0.82635	0.92387	0.87908	0.73324	0.85225
SSIIIIK	0	772.506	IPI00291922	IPI00291922	2	2.324e-05	132.09	1.2147	0.71615	0.58342	0.63249	0.73338	1.2545
DYSVTANSK	0	983.456	IPI00219217;IPI00788938;IPI00789173	IPI00219217	2	0.0051071	79.974	0.8247	0.63502	0.84472	0.75073	0.73369	0.87802
IYRETNEPVK	0	1247.65	IPI00644712;IPI00893062;IPI00889791;IPI00893179	IPI00644712	2	1.7884e-05	132.25	0.92559	0.85016	0.94597	0.89527	0.73387	0.8609
YCFGVEDTIK	0	1230.56	IPI00429191;IPI00967460;IPI00968296	IPI00429191	2	0.00010477	121.6	0.96231	0.78487	0.78001	0.78929	0.73395	0.99016
SAVGFEYQGK	0	1084.52	IPI00029601;IPI00062884;IPI00746806;IPI00791680	IPI00029601	2	0.0014686	94.616	1.0552	0.6188	0.66477	0.68352	0.73433	1.1406
EHRIDGRVIDPKK	1	1561.87	IPI00334587;IPI00742926;IPI00964992;IPI00334713;IPI00966854;IPI00964686;IPI00329355;IPI00106509	IPI00334587	3	0.10035	43.544	0.76143	0.78248	0.87029	0.73311	0.73434	1.0564
INQPPEDGISSVK	0	1382.7	IPI00013468;IPI00514701;IPI00644108;IPI00644568	IPI00013468	2	1.2454e-06	138.02	0.94565	0.81591	0.82753	0.91412	0.73468	0.77431
SEITGKFEK	1	1037.54	IPI00329801;IPI00964635;IPI00964913;IPI00964365	IPI00329801	2	0.016124	95.523	1.0904	0.65414	0.52959	0.48714	0.73547	1.55
NTRETAQAIK	0	1130.6	IPI00413324;IPI00644171;IPI00394699	IPI00413324	2	0.0012231	101.95	0.95083	0.70422	0.75669	0.51978	0.7356	1.3668
EFGTNIK	0	807.413	IPI00027230;IPI00939289;IPI00556482;IPI00556538	IPI00027230	2	0.037207	58.917	1.0043	0.75754	0.75874	0.77954	0.73566	0.8338
IKEEISK	1	845.486	IPI00007765;IPI00922694	IPI00007765	2	0.019332	113.71	0.96556	0.67955	0.83297	0.75482	0.73571	1.0216
SITNDWEDHIAVK	0	1526.74	IPI00414676;IPI00382470;IPI00784295;IPI00604607	IPI00382470	2,3	6.1216e-41	249.33	0.99136	0.68399	0.68704	0.72271	0.73618	1.0489
ACIPYIK	0	863.458	IPI00414384	IPI00414384	2	0.026448	62.715	0.89587	0.69876	0.76821	0.70604	0.73652	1.0318
STVEGIQASVK	0	1117.6	IPI00307162;IPI00291175	IPI00307162	1,2	2.4614e-08	162.68	1.1099	0.65424	0.58316	0.62592	0.73719	1.1703
SAFICGVMK	0	1011.49	IPI00012074;IPI00941649;IPI00644055;IPI00856038;IPI00018140;IPI00402183;IPI00930205;IPI00402182;IPI00402184	IPI00012074	2	2.7608e-08	152.34	0.97746	0.77878	0.75863	0.70325	0.73746	1.1003
ADIDVSGPK	0	900.455	IPI00021812;IPI00555610	IPI00021812	2	0.0029729	90.108	0.9598	0.76513	0.80689	0.86738	0.73756	0.91833
QQHVIETIIGKK	1	1392.81	IPI00010720;IPI00964079;IPI00965269;IPI00964855;IPI00965722;IPI00940257	IPI00010720	2	1.8134e-08	156.69	1.0841	0.73363	0.72171	0.60963	0.73782	1.2455
AKFENICK	1	1008.51	IPI00414676;IPI00455599	IPI00414676	2	0.006591	108.98	0.82775	0.77572	0.8337	0.80479	0.73791	0.9097
SIIVQTK	0	787.48	IPI00550021;IPI00651660;IPI00877635	IPI00550021	2	0.00049293	111.17	1.0502	0.75132	0.67122	0.69431	0.73982	1.055
KNIIIEEGK	1	1042.6	IPI00012011;IPI00909841	IPI00012011	2	0.0086328	83	0.99527	0.71438	0.78274	0.74907	0.73982	1.0513
ACTIIIRGASK	0	1188.66	IPI00553185;IPI00290770;IPI00552715	IPI00553185	2,3	4.8371e-37	228.12	0.98667	0.78928	0.78259	0.77741	0.73982	0.99627
QRARYIAEK	0	1133.63	IPI00186290;IPI00909570	IPI00186290	2,3	0.0017423	95.502	0.84359	0.70982	0.86547	0.88979	0.74016	0.91201
SPEIVQAMFPK	0	1245.64	IPI00940340;IPI00001636;IPI00385153;IPI00940152	IPI00940340	2	0.00057905	106.67	0.97144	0.81081	0.69364	0.80877	0.7409	0.94162
ATIIDISCNK	0	1133.58	IPI00396321;IPI00968169	IPI00396321	2	1.5656e-05	133.81	0.82108	0.87843	1.0907	0.8672	0.74102	0.90177
SIHQAIEGDTSGDFIK	0	1716.83	IPI00221226;IPI00002459;IPI00974274;IPI00442825;IPI00974094	IPI00221226	2	0.00017138	111.92	1.0608	0.73031	0.68421	0.54688	0.74202	1.3285
ENAPAIIFIDEIDAIATK	0	1943.03	IPI00020042;IPI00738042;IPI00216770	IPI00020042	2,3	7.1316e-69	168.27	1.0915	0.98495	0.9157	0.70296	0.74209	0.96056
ICDSYEIRPGK	0	1336.64	IPI00012074;IPI00941649;IPI00644055;IPI00856038;IPI00910614;IPI00856037	IPI00012074	2,3	0.003264	81.92	0.89501	0.71783	0.80021	0.69073	0.74257	0.94138
FHHTFSTEIAK	0	1316.65	IPI00009904	IPI00009904	2	0.0002728	113.93	1.2462	0.74014	0.61237	0.64821	0.74281	1.2586
REHAITSGTIK	0	1211.66	IPI00300341;IPI00796346;IPI00791185;IPI00973924;IPI00789454	IPI00300341	2	0.065291	38.238	1.1944	0.63767	0.56692	0.61201	0.74315	1.2776
DGDGTITTK	0	906.429	IPI00916600;IPI00916768;IPI00794543;IPI00075248;IPI00386621;IPI00915959	IPI00916600	2	0.0040457	81.865	0.93464	0.66115	0.62998	0.77605	0.74346	0.99233
SESPKEPEQIRK	1	1426.74	IPI00215965;IPI00760620;IPI00465365;IPI00644968;IPI00797148;IPI00908994;IPI00909288	IPI00215965	2,3	1.2716e-12	184.34	1.0242	0.75331	0.6593	0.61	0.74356	1.1123
SYSPYDMIESIRK	0	1587.76	IPI00418169;IPI00455315;IPI00334627;IPI00903334	IPI00418169	2,3	1.1553e-51	250.67	1.0125	0.67912	0.69234	0.66233	0.7437	1.1146
RVIIGETGK	0	971.576	IPI00025091;IPI00748962	IPI00025091	2	0.0088333	74.841	1.0211	0.66402	0.72226	0.78426	0.74382	1.0944
TRVIWGK	0	858.508	IPI00029731;IPI00793102;IPI00879894	IPI00029731	2	0.090614	43.124	1.0116	0.75615	0.72099	0.73561	0.74411	1.0435
TKPIATTQPAK	0	1154.67	IPI00880007;IPI00396171;IPI00888475;IPI00878314;IPI00927819;IPI00411375;IPI00924603;IPI00743873	IPI00880007	2	0.00039255	108.35	1.0986	0.83319	0.82409	0.68413	0.74416	1.1984
IGIHEDSQNRK	0	1295.66	IPI00382470;IPI00784295;IPI00604607	IPI00382470	2,3	8.1684e-09	169.65	0.99439	0.73999	0.86911	0.84666	0.74461	0.89573
SRENPEEDEDQRNPAK	0	1912.85	IPI00745125;IPI00644020	IPI00745125	3	3.1432e-08	137.8	0.9079	0.67742	0.71918	0.73423	0.7452	1.0297
KTEAPAAPAAQETK	1	1411.73	IPI00299024;IPI00908521	IPI00299024	2,3	9.5166e-10	154.47	0.8593	0.77253	0.89277	0.93121	0.74561	0.93157
GAAPAPPGK	0	764.418	IPI00815713;IPI00815944;IPI00815731;IPI00965339;IPI00914061;IPI00165041;IPI00941770;IPI00969501;IPI00298696;IPI00555853;IPI00966633	IPI00815713	2	1.8486e-22	138.9	1.1003	0.82287	0.7148	6.0203	0.74583	0.12709
ETHADIWPAK	0	1166.57	IPI00220219;IPI00789674;IPI00966209	IPI00220219	2	0.0032433	84.658	0.99501	0.65598	0.70165	0.6221	0.74662	1.0775
SVREFIEK	0	1006.54	IPI00024175;IPI00218372;IPI00647380	IPI00024175	2	0.006915	84.615	1.1871	0.66504	0.60223	0.66486	0.74755	1.1213
YGIENVK	0	821.428	IPI00016862;IPI00953236;IPI00759575;IPI00953696	IPI00016862	2	0.022031	69.998	1.0471	0.71582	0.81899	0.66023	0.74761	1.078
EGMQIISEKPETEAVVK	0	1886.97	IPI00333015;IPI00005614;IPI00328230	IPI00333015	2	4.4517e-27	205.98	0.77087	0.83645	1.1291	0.82658	0.74769	1.0391
KCDIISIPK	1	1072.6	IPI00867509;IPI00943173;IPI00798401;IPI00797709	IPI00867509	2	0.010221	79.148	0.96484	0.69471	0.70118	0.68976	0.74802	1.1565
AEGPGISRTGVEIGKPTHFTVNAK	0	2465.3	IPI00333541;IPI00302592;IPI00644576;IPI00553169	IPI00333541	3	2.0459e-08	105.38	0.79498	0.79056	1.1709	1.0641	0.74859	0.75203
KIEGNSPQGSNQGVK	1	1541.78	IPI00028481	IPI00028481	3	0.0011908	95.264	0.80649	0.74692	0.99853	0.89883	0.74873	0.9192
EANEIIQRSK	0	1186.63	IPI00291510;IPI00925196;IPI00924999;IPI00795859;IPI00791628;IPI00375527;IPI00856084;IPI00442268;IPI00644730;IPI00940243;IPI00916697;IPI00945779;IPI00916378;IPI00647813;IPI00944992	IPI00291510	2	1.1334e-09	122.33	0.86932	1.3317	1.5563	0.81687	0.74926	0.91464
SFIDSGYRIIGAVAK	0	1595.87	IPI00307162;IPI00291175;IPI00910496	IPI00307162	2	1.8053e-30	209.79	1.0065	0.70252	0.66417	0.67162	0.74997	1.0975
VAEIEHAEK	0	1024.52	IPI00297779	IPI00297779	2	0.031897	55.064	0.98519	0.82225	0.92372	0.91115	0.75077	0.85035
ETIMNQEK	0	991.464	IPI00221035;IPI00419473;IPI00965254;IPI00258884;IPI00015945	IPI00221035	2	0.0011409	112.75	0.90097	0.68665	0.73578	0.81874	0.75096	0.89349
VITPEEQIADK	0	1241.65	IPI00290461;IPI00910728	IPI00290461	2	0.0071081	70.488	0.84265	0.78835	0.92196	0.95752	0.75233	0.76245
MADKDGDIIATK	1	1276.63	IPI00789155;IPI00941900	IPI00789155	2	0.0058161	125.61	1.0335	0.94336	1.0364	0.70939	0.75235	1.0754
SNIAYDIVQIPTGITGIK	0	1902.05	IPI00002966;IPI00031022	IPI00002966	2	2.7612e-37	219.87	1.117	0.68964	0.63188	0.67402	0.75253	1.1977
SRIDQEIK	0	987.535	IPI00221088;IPI00925580;IPI00879238;IPI00478327;IPI00647546;IPI00853062;IPI00879512	IPI00221088	2	0.0015427	108.43	1.0562	0.6863	0.62935	0.64345	0.75255	1.1079
DIGKPIEK	0	898.512	IPI00021570	IPI00021570	2	0.013723	71.379	0.96753	0.85096	0.86207	0.81215	0.7527	1.0381
IIANMVYQYK	0	1241.65	IPI00479306;IPI00383971;IPI00910237	IPI00479306	2	6.1627e-06	140.45	0.94428	0.83393	0.87649	1.0065	0.75282	0.81119
NNQITNNQRIK	0	1341.71	IPI00169383;IPI00909158	IPI00169383	2	1.2456e-12	167.6	1.0937	0.76016	0.7442	0.66662	0.75286	1.2412
SQIDIIIHSIK	0	1265.73	IPI00220834	IPI00220834	2	2.691e-27	214	1.0284	0.74564	0.69285	0.69373	0.75304	1.0951
KQGGIGPMNIPIVSDPK	1	1749.94	IPI00000874;IPI00640741	IPI00000874	2,3	0.0012451	85.619	0.96995	0.91943	0.97236	0.91915	0.75325	1.0174
TSYAQHQQVRQIRK	0	1741.93	IPI00419880;IPI00472119;IPI00967641;IPI00967073;IPI00964983;IPI00966860;IPI00968146;IPI00965772;IPI00966516	IPI00419880	3	0.031844	53.448	1.1186	0.83171	0.8044	0.56813	0.75372	1.559
AIVAYYQK	0	954.517	IPI00221092;IPI00397701	IPI00221092	2	1.5307e-08	158.12	0.90559	0.77639	0.89127	0.96192	0.75398	0.86773
GIVAVGERAQK	0	1126.65	IPI00218624;IPI00218620;IPI00000192;IPI00218622;IPI00748258;IPI00903283;IPI00444149	IPI00218624	2	7.0644e-05	124.67	0.92763	0.83918	0.89067	0.87403	0.75416	0.9035
KSDVEAIFSK	1	1122.59	IPI00477313;IPI00216592;IPI00909232;IPI00759596;IPI00027569;IPI00735540;IPI00887991;IPI00868835;IPI00910718;IPI00910666;IPI00877664	IPI00477313	2	0.00067625	123.67	0.93417	0.80379	0.8539	0.84551	0.75438	1.0621
SKPGAAMVEMADGYAVDRAITHINNNFMFGQK	0	3482.65	IPI00848328;IPI00647473;IPI00027834;IPI00465225	IPI00027834	4	3.0029e-11	109.19	0.88956	1.138	1.0959	0.8981	0.75483	0.93964
SRDIIVQQASQCISK	0	1731.89	IPI00456887;IPI00929107	IPI00456887	3	0.0053833	72.681	0.99782	1.043	1.1085	0.82315	0.75584	1.0851
DVRWPTETDVSSAK	0	1589.77	IPI00880007;IPI00396171;IPI00888475;IPI00878314;IPI00220113	IPI00880007	2	0.029828	53.995	1.0023	1.2152	1.1541	1.004	0.7565	0.79271
SSIGPVGIDK	0	971.529	IPI00290566	IPI00290566	2	0.00070219	115.57	1.1336	0.75705	0.67376	0.63515	0.75651	1.1871
SEPIPESNDGPVK	0	1367.66	IPI00025252;IPI00847663	IPI00025252	2	2.8252e-14	173.72	0.96977	0.66393	0.68487	0.70286	0.75659	1.0651
VIPIDRDNK	0	1068.59	IPI00293464	IPI00293464	2	0.0066687	77.192	0.88834	0.77221	0.81818	1.002	0.75666	0.78201
AEEERIRQEAK	0	1357.69	IPI00029012	IPI00029012	2,3	1.2363e-05	145.46	0.95252	0.78931	0.84731	0.9088	0.75707	0.89093
KIEEEGEQFVK	1	1334.67	IPI00026105;IPI00479510;IPI00973807;IPI00943320;IPI00479934;IPI00909685	IPI00026105	2	0.010615	71.806	0.89489	0.85745	0.99669	0.83854	0.75728	1.0125
QEEASGGPTAPK	0	1170.55	IPI00301058	IPI00301058	2	0.00018074	107.09	0.83472	0.87431	0.96649	0.77176	0.75771	1.0837
KPAAAAAPGTAEK	0	1181.64	IPI00032140;IPI00910487	IPI00032140	2	0.00020884	113.72	0.89254	0.85983	0.84507	0.85351	0.75777	0.85194
KPAPPPAPPQATK	0	1298.73	IPI00908725;IPI00328929;IPI00293312;IPI00952968	IPI00908725	2	0.0016746	86.803	0.85859	0.83669	0.97328	0.89456	0.75807	0.92304
VGEFSGANK	0	907.44	IPI00216298;IPI00552768	IPI00216298	2	0.0038089	82.749	0.83031	0.69909	0.87082	0.85481	0.75838	0.86268
STIDIVIANK	0	1072.61	IPI00013871	IPI00013871	2	7.1133e-07	162.36	1.0648	0.65438	0.68139	0.64413	0.75878	1.2046
IFNIHED	0	886.418	IPI00000690;IPI00157908;IPI00300018;IPI00910617	IPI00000690	2	0.031214	73.616	1.0258	0.88858	0.97284	0.66354	0.75878	0.87809
SVSAFAPICNPVICPWGK	0	2001.98	IPI00411706;IPI00641040;IPI00645836	IPI00411706	2	1.5278e-157	214.22	0.92763	0.7767	0.85545	0.61029	0.75891	1.1335
SDIRHIRAVPTDEARAFAEK	0	2281.19	IPI00020436;IPI00429190;IPI00941638;IPI00930720;IPI00911020	IPI00020436	3	0.00091714	75.682	1.0919	0.77976	0.7276	0.65338	0.75899	1.325
VPRNFRIIEEIEEGQK	0	1956.04	IPI00397947;IPI00890717;IPI00019599;IPI00030962;IPI00472498;IPI00019600;IPI00514724;IPI00789287;IPI00797889;IPI00965965	IPI00397947	3	0.00019426	107.35	0.95132	0.96111	0.99421	1.2055	0.75966	0.73204
SIDQDPVVRAQEIK	0	1596.85	IPI00514983;IPI00939163;IPI00513743;IPI00218993;IPI00908988;IPI00794417	IPI00514983	2	2.6703e-05	117.08	1.0727	0.85972	0.7722	0.74028	0.75967	1.0643
AEGAATEEEGTPK	0	1288.58	IPI00299024;IPI00908521	IPI00299024	2	2.3708e-174	288.52	0.9133	0.81752	0.89199	0.82662	0.75994	0.81297
SVNEIIYK	0	964.523	IPI00871827;IPI00472171;IPI00030179;IPI00794746;IPI00878826	IPI00871827	2	0.0019977	103.55	1.0939	0.75508	0.71356	0.77976	0.7608	1.0049
GRGHVQPIRCTNCARCVPK	0	2265.12	IPI00655650;IPI00401819;IPI00477550;IPI00795435;IPI00797875	IPI00655650	3	0.00065408	84.842	0.96656	0.66851	0.71774	0.67475	0.76118	1.1861
GTANARMPEK	0	1073.53	IPI00025329	IPI00025329	2	3.553e-30	150.04	0.91024	1.06	1.1632	0.73755	0.76187	0.8941
KYAEAVTRAK	1	1135.63	IPI00169383;IPI00916818;IPI00909158	IPI00169383	2,3	0.00082537	106.29	0.90963	0.80682	0.85596	0.83506	0.76255	1.0217
SPPGQVTEAVK	0	1111.59	IPI00413641;IPI00556258;IPI00926520	IPI00413641	2	0.00069909	109.72	0.61525	0.47627	0.84085	0.76523	0.76257	0.99385
VCQGEREMAGDNK	0	1492.64	IPI00007765	IPI00007765	2	7.2213e-22	196.84	0.79173	0.67265	0.95325	0.87427	0.76268	0.79153
SIPCDICK	0	991.447	IPI00219825;IPI00744835;IPI00873020;IPI00873201;IPI00012503;IPI00556640	IPI00219825	2	0.0044051	92.062	1.0572	0.71567	0.69925	0.74962	0.76307	0.97541
ANPFGGASHAK	0	1055.51	IPI00218606;IPI00965899;IPI00966986;IPI00968307;IPI00966370;IPI00793332;IPI00965062	IPI00218606	2	1.1706e-08	160.67	0.91122	0.80804	0.82516	0.84373	0.76344	0.96492
IIFQMPQNK	0	1117.6	IPI00009342;IPI00328905;IPI00299048;IPI00968174;IPI00871809;IPI00965765;IPI00967610	IPI00009342	2	0.0017388	95.531	0.90486	0.73024	0.81782	0.88486	0.76356	0.82838
SPDDPARHITGEK	0	1421.69	IPI00218474;IPI00909949;IPI00942494;IPI00909595	IPI00218474	2	3.2294e-09	131.35	1.0569	0.65175	0.66131	0.71094	0.76383	0.86548
SACGVCPGRIRGVRAVRPK	0	2095.14	IPI00219160	IPI00219160	3	0.046125	48.216	0.96141	0.7902	0.74566	0.59592	0.76431	1.0985
TSIAIDTIINQK	0	1315.73	IPI00440493;IPI00908963	IPI00440493	2	1.2026e-19	180.24	1.0795	0.84825	0.76548	0.59609	0.76458	1.3067
AEIMEISEDK	0	1163.54	IPI00009032;IPI00916802;IPI00916922;IPI00917386;IPI00917205	IPI00009032	2	0.0018353	90.685	1.0665	0.95143	0.92522	1.0351	0.76466	0.80356
SAAQAAAQTNSNAAGK	0	1459.7	IPI00470498;IPI00412714;IPI00410693;IPI00470497	IPI00470498	2,3	3.1267e-74	273.88	0.97257	0.66019	0.64313	0.59195	0.76467	1.0759
GPVRMPTK	0	884.49	IPI00794659;IPI00012493;IPI00791265	IPI00794659	2	5.5464e-05	111.95	0.91973	0.72812	0.77889	0.8729	0.76487	0.88709
KVERQTEIK	1	1129.65	IPI00008524;IPI00410017;IPI00796945;IPI00909378;IPI00301154;IPI00794246	IPI00008524	2	0.00090997	107.79	0.91663	0.78411	0.79939	0.73457	0.76515	0.9967
SVVAPPGAPK	0	921.528	IPI00910513;IPI00909083;IPI00218829	IPI00910513	2	0.002016	99.815	1.1717	0.66869	0.56029	0.68969	0.76547	1.0765
SFEAPATINSASIHPEK	0	1797.89	IPI00294536;IPI00941907;IPI00795518	IPI00294536	2,3	7.6412e-75	281.67	1.0507	0.88395	0.83049	0.71225	0.76565	1.0069
ESSTVFEIK	0	1038.52	IPI00410162;IPI00026670;IPI00917694	IPI00410162	2	0.00095251	117.7	1.0066	0.7882	0.80387	0.90515	0.76572	0.89904
EIDYERIHK	0	1201.61	IPI00031420;IPI00956601;IPI00964927	IPI00031420	2	0.00015824	145.25	1.1258	0.88381	0.79759	0.96675	0.76613	0.87554
GAVDAIAAAIAHISGASSFEPRSIITSDK	0	2854.48	IPI00031554	IPI00031554	3	2.864e-30	171.42	0.94572	1.0606	1.181	1.1067	0.76629	0.91144
TSGTIISFIYPAQNPEIINK	0	2205.17	IPI00337541;IPI00964130;IPI00963871;IPI00967459;IPI00964391	IPI00337541	2	2.0054e-10	138.07	0.7506	0.78915	0.96423	0.62139	0.76677	1.2809
IQPHPRTGNK	0	1146.63	IPI00013452;IPI00909383	IPI00013452	3	0.051664	44.309	0.90126	0.85754	0.89704	0.93039	0.76701	0.72136
GEDFPANNIVK	0	1202.59	IPI00945633;IPI00946839;IPI00301021;IPI00945795;IPI00946676	IPI00945633	2	0.0005839	106.4	0.83588	0.79985	0.99285	0.94289	0.7676	0.85854
STGGAPTFNVTVTK	0	1378.71	IPI00216691	IPI00216691	2	8.5359e-15	169.4	1.1473	0.64881	0.56038	0.60467	0.76789	1.2665
SIAEHRTPDVIK	0	1364.74	IPI00013894;IPI00479946;IPI00908463	IPI00013894	3	9.6946e-05	115.57	1.0459	0.69272	0.6547	0.65887	0.7687	1.1362
RVITIRK	0	884.592	IPI00550021;IPI00651660;IPI00877635;IPI00219335	IPI00550021	2	0.1145	36.395	0.85323	0.77052	0.86221	0.82196	0.76967	0.98817
SQIHDIVIVGGSTRIPK	0	1819.03	IPI00003865;IPI00037070;IPI00939595	IPI00003865	2,3	4.5953e-47	235.4	1.0815	0.7153	0.67769	0.67899	0.77005	1.1974
AAQEEYVK	0	936.455	IPI00796333;IPI00465439	IPI00796333	2	1.3918e-08	158.76	0.85492	0.76386	0.92398	0.86023	0.7702	0.94881
NIQEAEEWYK	0	1308.6	IPI00418471;IPI00552689;IPI00793184;IPI00013164	IPI00418471	2	3.1866e-12	172.17	0.84143	0.81135	0.95144	0.90771	0.77035	1.0292
SIYYYIQQDTK	0	1420.69	IPI00418169;IPI00455315;IPI00334627;IPI00909509;IPI00795925	IPI00418169	2	3.6434e-09	171.57	0.98945	0.69	0.67549	0.71808	0.77044	1.1277
IAEQAERYDDMAACMK	0	1900.81	IPI00021263;IPI00793388;IPI00790689	IPI00021263	2,3	1.7978e-31	209.31	0.93491	0.98896	1.0427	0.67033	0.7708	1.0215
APQVRAASAPAK	0	1165.66	IPI00815713;IPI00815944;IPI00815731;IPI00965339;IPI00914061;IPI00165041;IPI00941770;IPI00969501;IPI00298696;IPI00555853	IPI00815713	2	0.00026643	116.24	0.82784	0.91722	0.97721	0.85824	0.77099	1.0652
SADTIWDIQK	0	1175.58	IPI00219217	IPI00219217	2	2.4802e-12	175.15	1.1593	0.99621	0.7997	0.75941	0.77105	1.0561
GCGDICRVIRAK	0	1403.71	IPI00550069	IPI00550069	2,3	0.0016392	88.338	0.92478	0.79029	0.84984	0.88653	0.77108	0.87603
MDERAIPK	0	958.491	IPI00171903;IPI00383296	IPI00171903	2	0.0068162	86.67	1.0224	0.92447	0.87946	0.83239	0.77111	1.0103
SYISGGAGAAGGGGADPGNK	0	1662.76	IPI00878557;IPI00014513	IPI00878557	2	1.3777e-15	160.27	1.0961	0.63215	0.62658	0.65765	0.77126	1.1428
SYEPIEDPGVK	0	1232.59	IPI00744692	IPI00744692	2	7.0644e-05	122.7	1.1019	0.74469	0.65999	0.68227	0.77133	1.1636
VIPTHDASK	0	966.513	IPI00333541;IPI00302592;IPI00644576;IPI00553169;IPI00552416	IPI00333541	2	0.001518	107.15	0.87344	0.86266	0.85172	0.99901	0.7714	0.77459
SYCAEIAHNVSSK	0	1464.67	IPI00927658;IPI00395998;IPI00927458;IPI00794734;IPI00927543	IPI00927658	2	1.4854e-21	206.49	1.0425	0.71819	0.6715	0.66459	0.77195	1.1583
NIEVINFFNNQIEEIPTQISSIQK	0	2817.45	IPI00847168;IPI00017256;IPI00377066;IPI00478433	IPI00847168	3	0.0099894	55.337	0.9444	1.2155	1.0001	0.99335	0.7721	0.75865
SGGTAIHVAAAK	0	1081.59	IPI00183002;IPI00397728;IPI00413191;IPI00397730;IPI00939648;IPI00789895	IPI00183002	2	8.7503e-06	140.24	1.1268	0.6403	0.57587	0.54963	0.77233	1.3604
RIIPDGCGVK	0	1113.6	IPI00554723;IPI00853161;IPI00646899	IPI00554723	2	0.00060901	107.06	0.89673	0.76371	0.94979	0.83708	0.77234	1.0462
KGDIVDIK	1	886.512	IPI00247583;IPI00879165;IPI00845507;IPI00878451	IPI00247583	2	0.032953	66.27	0.94931	0.76505	0.84029	0.84059	0.77253	0.99963
GRDVIAQSQSGTGK	0	1402.72	IPI00009328	IPI00009328	2	4.7519e-23	203.2	1.0021	0.81951	0.89772	0.87174	0.77396	0.94102
SADTIWGIQK	0	1117.58	IPI00947127;IPI00217966;IPI00607708;IPI00939286;IPI00908791;IPI00910754	IPI00947127	2	9.4716e-07	158.79	0.85002	0.68633	0.76721	0.74717	0.77422	1.1038
IGKPHTVPCK	0	1135.62	IPI00013485;IPI00165486;IPI00386445;IPI00871956;IPI00877829	IPI00013485	2,3	1.4572e-05	136.96	0.83491	0.80412	0.91513	0.84318	0.7744	0.90107
STACQMIVCYAK	0	1430.64	IPI00939304;IPI00793443;IPI00937471	IPI00939304	2	2.6124e-10	172.76	1.0988	0.70227	0.59784	0.63914	0.77493	1.1915
SMFAGVPTMRESSPK	0	1623.77	IPI00005737;IPI00399142;IPI00641719	IPI00005737	2,3	3.0916e-23	196.95	1.05	0.73036	0.69295	0.66844	0.77539	1.1765
RIHGVGFK	0	912.529	IPI00917298;IPI00848331;IPI00026302;IPI00856058;IPI00916315;IPI00915795;IPI00917675;IPI00916572	IPI00917298	2	0.0012513	101.99	1.086	0.67283	0.63988	0.64522	0.7755	1.2389
TISPMVMDAK	0	1091.54	IPI00307162;IPI00291175;IPI00910496	IPI00307162	2	0.036423	51.092	1.0659	0.78798	0.71732	0.73835	0.77556	0.99713
IDHIIDAI	0	908.497	IPI00025874;IPI00793589	IPI00025874	2	0.00049078	129.4	1.0901	0.96373	0.82395	0.61466	0.77559	1.0826
WEGIVYAPPGK	0	1215.63	IPI00104050	IPI00104050	2	0.0075585	69.346	0.90431	0.7127	0.81513	0.88867	0.77561	0.79688
IRIIAQK	0	840.555	IPI00218342;IPI00794900	IPI00218342	2	5.7558e-06	149.4	0.86703	0.82708	0.92263	0.8462	0.77566	0.87704
EIPGFIQSGK	0	1074.57	IPI00017526	IPI00017526	2	0.00033649	113.47	0.88574	0.74964	0.85428	0.96421	0.7758	0.79604
VREIIQK	0	884.544	IPI00216694;IPI00908503	IPI00216694	2	3.5798e-05	125.25	0.88944	0.81937	0.90868	0.94348	0.77657	0.8395
GDYPQAMK	0	908.406	IPI00013894;IPI00479946;IPI00908463	IPI00013894	2	0.00039757	128.38	0.84459	0.76805	0.82068	0.88038	0.77699	0.83672
ISSIPFQK	0	918.517	IPI00009901;IPI00943759;IPI00943707;IPI00943826	IPI00009901	2	0.0026546	96.492	0.90518	0.72801	0.82569	0.89647	0.77708	0.90825
RIQEETGAK	0	1030.54	IPI00008575;IPI00479209;IPI00385834;IPI00166708;IPI00903310	IPI00008575	2	0.0012192	99.815	0.89105	0.72514	0.82072	0.81467	0.77709	0.95723
WSVHIAMHPQVNIYSVTRK	0	2265.18	IPI00747810;IPI00163187	IPI00747810	3	0.0018593	75.018	0.91877	0.87728	0.85583	0.87766	0.77713	0.96481
TDSTCRMVTSESK	0	1500.65	IPI00022462;IPI00924935	IPI00022462	2	0.069602	42.426	1.0514	0.816	0.71608	0.64016	0.77744	1.3119
WWHTGAIYRIGDIQAFQGHGAGNIAGIK	0	3036.55	IPI00554481;IPI00554611;IPI00604710;IPI00554722;IPI00027493	IPI00554481	3,4	1.0441e-62	157.01	1.0087	0.68542	0.66795	0.68193	0.7776	1.1675
ITFSCIGGSDNFK	0	1444.67	IPI00789101;IPI00789698;IPI00015029;IPI00908647;IPI00790462;IPI00910575	IPI00789101	2	2.3083e-180	212.59	1.0654	1.0334	0.98053	0.87867	0.7776	0.92649
SARDVFTK	0	922.487	IPI00216308;IPI00790304;IPI00910830	IPI00216308	2	0.006864	80.231	1.1601	0.66926	0.58121	0.65671	0.77799	1.2981
KPRSQRYESIK	0	1390.77	IPI00419919;IPI00796934;IPI00019208;IPI00793936;IPI00798109;IPI00945894	IPI00419919	2,3	0.0018377	88.681	0.94014	0.80849	0.83733	0.82825	0.77819	0.93762
EAGDAESRVFYIK	0	1483.73	IPI00013890	IPI00013890	2	4.224e-78	174.9	0.87324	0.72622	0.87913	0.94018	0.7784	0.82955
EAIGIPAAASFK	0	1173.64	IPI00289499;IPI00925601	IPI00289499	2	0.0047255	74.76	0.92305	0.8451	0.92175	0.81253	0.7793	0.83451
AGIIERVK	0	884.544	IPI00022228;IPI00894287;IPI00443983;IPI00894047	IPI00022228	2	1.384e-18	186.3	0.99665	0.81551	0.87932	0.79679	0.77932	0.94061
EIVPVIVSTRK	0	1239.76	IPI00291419	IPI00291419	2	1.7505e-14	134.3	0.67802	0.67818	0.98016	0.93226	0.77947	0.84387
SVQNDSQAIAEVINQIK	0	1855.96	IPI00013933;IPI00969616;IPI00217182	IPI00013933	3	0.00035226	102.38	0.8963	0.74614	0.83404	0.65676	0.7803	1.1458
VIRESGIK	0	900.539	IPI00219910;IPI00783862	IPI00219910	2	0.00088971	116.05	0.99692	0.95565	0.92507	1.0328	0.78048	0.65778
EVIPVNVPEAQEEMK	0	1710.85	IPI00013452;IPI00909383	IPI00013452	2	0.0023975	82.908	1.0012	1.1406	1.0673	0.84638	0.78054	0.93034
AEHDQIIINYAK	0	1413.73	IPI00217975;IPI00790831	IPI00217975	2	3.1762e-13	175.48	1.0081	0.70222	0.69379	0.68692	0.78084	1.1278
AGVSTNISTK	0	976.519	IPI00006038;IPI00337397;IPI00216688;IPI00953181;IPI00337395;IPI00936708	IPI00006038	2	0.0018969	93.096	0.94056	0.85988	0.88646	0.80163	0.78131	0.9566
WKDSDEADIVIAK	1	1488.75	IPI00297579	IPI00297579	2	1.1368e-07	154.47	0.86483	0.82684	0.94407	1.026	0.7815	0.8475
NKEEAAEYAK	1	1151.55	IPI00021840;IPI00643522	IPI00021840	2	0.0048136	107.06	0.87938	0.8104	0.88567	0.81892	0.78177	1.0315
IMIDINK	0	845.468	IPI00022793;IPI00969375	IPI00022793	1,2	0.035894	107.43	1.0213	0.99634	1.0552	0.82682	0.78185	0.99782
NSTFSEIFK	0	1071.52	IPI00643920;IPI00942979;IPI00792641;IPI00940673;IPI00793119;IPI00789310	IPI00643920	2	0.0038236	82.261	1.0745	1.019	0.74718	0.68811	0.78198	1.0883
TFDQITPEESK	0	1293.61	IPI00789155;IPI00941900	IPI00789155	2	3.8297e-08	150.49	1.0298	0.83484	0.81635	0.75859	0.78219	1.1229
VVQVYRK	0	890.534	IPI00027270;IPI00433834;IPI00007144;IPI00789514;IPI00790553;IPI00552470;IPI00455174;IPI00872953	IPI00027270	2	0.0016796	100.74	0.95441	0.82564	0.88465	0.88797	0.78261	0.97612
FRHVFGQAVK	0	1187.66	IPI00867509;IPI00943173;IPI00798401	IPI00867509	2	0.004156	78.939	1.0686	0.70534	0.59515	0.6552	0.78282	1.3807
VAGGAAPSKPASAK	0	1210.67	IPI00908873;IPI00216654;IPI00292387	IPI00908873	2,3	1.473e-07	143.25	0.89668	0.71357	0.93746	0.90127	0.78289	1.0626
SGVGTAIIIK	0	957.586	IPI00022462;IPI00924935	IPI00022462	2	2.3724e-05	128.17	1.0969	0.70842	0.66947	0.62211	0.7834	1.2744
KVSAQEVRK	1	1043.61	IPI00843975;IPI00872684	IPI00843975	2	0.0084962	79.148	0.88231	0.7259	0.75796	0.7645	0.78359	1.0199
KVTAQDVRK	1	1043.61	IPI00219365	IPI00219365	2	0.0038142	89.247	0.88231	0.7259	0.75796	0.7645	0.78359	1.0199
SMVPVQVQIDVPVVK	0	1636.92	IPI00001661;IPI00787306;IPI00747309;IPI00925791;IPI00926548;IPI00925317;IPI00927389;IPI00925570	IPI00001661	2	9.0839e-11	160.81	1.0506	0.75361	0.72568	0.72142	0.78364	1.0906
SIRDTPAK	0	886.487	IPI00549248;IPI00658013;IPI00604504;IPI00956486	IPI00549248	2	0.00059779	125.82	0.76582	0.74251	1.0151	0.70458	0.78381	0.94389
NCIVIIDSTPYRQWYESHYAIPIGRK	0	3178.6	IPI00216587;IPI00645201	IPI00216587	3	2.7971e-10	111.66	0.84782	0.69037	1.195	0.70137	0.78394	1.1319
IGPRRIHTVRVRGGNK	0	1815.08	IPI00216587	IPI00216587	3	0.10376	35.037	0.8745	0.80508	1.0268	0.97297	0.78423	0.83392
SIPICTIK	0	930.521	IPI00645078;IPI00908755	IPI00645078	2	0.014938	69.812	1.0149	0.73408	0.72831	0.70679	0.78442	1.1046
SIIQAINEVK	0	1113.64	IPI00456969	IPI00456969	2	2.2996e-05	128.67	0.95778	0.73819	0.7556	0.72451	0.78445	1.0155
GAPEGVIDRCTHIRVGSTK	0	2052.05	IPI00219078;IPI00969023;IPI00177817;IPI00747443;IPI00914019	IPI00219078	3	0.0023246	74.141	0.88465	1.0382	1.2393	1.0753	0.78451	0.68697
WIDFVRGAK	0	1090.59	IPI00009032;IPI00916802	IPI00009032	2	0.031023	55.461	0.91465	0.77635	0.83384	0.8055	0.7851	0.99399
IFVGGIK	0	732.453	IPI00396378;IPI00916517;IPI00414696;REV__IPI00144293;REV__IPI00376222;IPI00011913;IPI00215965;IPI00760620;IPI00465365;IPI00644968;IPI00797148;IPI00879501;IPI00797902;IPI00176692;IPI00742127;IPI00789127;IPI00419373;IPI00455134;IPI00939124;IPI00909208;IPI00927677;IPI00927407	IPI00396378	1,2	9.1319e-19	118.06	1.0021	0.96669	0.96242	0.90132	0.78517	0.87925
TSTGAPAAIK	0	915.503	IPI00027341;IPI00916783;IPI00908511;IPI00972980;IPI00917562	IPI00027341	2	0.0044745	76.943	1.081	0.72967	0.62694	0.6311	0.78581	1.286
AQEQQQQMAEIHSK	0	1654.77	IPI00856098;IPI00215743;IPI00220967;IPI00744135	IPI00856098	3	0.00035558	103.83	0.96674	1.0032	1.0251	1.0705	0.78596	0.81914
SATIIQIITK	0	1086.66	IPI00871742;IPI00235412;IPI00146935;IPI00555883;IPI00037283;IPI00942042;IPI00473085;IPI00910662	IPI00871742	2	3.2941e-05	142.1	1.0373	0.70597	0.68517	0.61082	0.78627	1.2877
YAEAVTRAK	0	1007.54	IPI00169383;IPI00916818;IPI00909158	IPI00169383	2	5.149e-53	169.41	0.83364	0.75956	0.89246	0.77289	0.78632	0.92521
SQDPRNPHNDRFVISK	0	1908.96	IPI00643920;IPI00942979;IPI00946864;IPI00946973	IPI00643920	3	0.063614	44.44	1.0757	0.74786	0.65322	0.70253	0.78676	1.2298
ANISIIRRPGEK	0	1352.79	IPI00010740;IPI00216613	IPI00010740	2,3	0.035803	54.023	0.97077	0.72494	0.7717	0.8304	0.78728	0.97162
VIIPEYGGTK	0	1075.59	IPI00220362;IPI00916763;IPI00916345	IPI00220362	2	0.0041226	79.148	0.91417	0.8427	0.95895	0.97751	0.78735	0.84151
GAASEAGRAMHIMK	0	1428.7	IPI00030098	IPI00030098	2,3	1.4284e-42	239.03	1.0129	0.88794	0.90233	0.91435	0.78741	0.93363
AQAIRDNSTMGYMAAK	0	1726.81	IPI00382470;IPI00784295;IPI00604607	IPI00382470	2	4.4812e-47	243.04	0.87593	0.84172	0.94084	0.9769	0.78804	0.93608
RKMDETDASSAVK	1	1436.69	IPI00025815;IPI00971018;IPI00639819	IPI00025815	2	4.5472e-21	199.8	1.0528	0.87559	0.89592	0.91865	0.78812	0.92633
INMEISEK	0	962.474	IPI00024911	IPI00024911	2	0.059225	47.187	0.9386	0.75407	0.71864	0.84721	0.78819	0.87664
RTTVVAQIK	0	1014.62	IPI00013068;IPI00796161	IPI00013068	2	0.0013414	110.14	1.0116	0.75146	0.77653	0.71811	0.78831	1.1371
DAISGIGTDEK	0	1104.53	IPI00221226;IPI00002459	IPI00221226	2	0.00052907	103.34	1.8332	0.94007	0.59771	0.87973	0.78833	0.93955
TAVTTVPSMGIGIVK	0	1472.83	IPI00184546	IPI00184546	2	0.019951	81.311	1.0559	0.80854	0.73394	0.79197	0.78865	1.1123
GVTIGFRYK	0	1039.58	IPI00031691;IPI00968128;IPI00965303;IPI00966707;IPI00795717;IPI00910195;IPI00909133;IPI00719047	IPI00031691	2	1.0084e-25	226.46	0.91932	0.81191	0.89318	0.85355	0.78874	0.91799
SVQPTSEERIPK	0	1369.72	IPI00784614;IPI00784808;IPI00784936;IPI00871679;IPI00455033;IPI00883870;IPI00784835	IPI00784614	2,3	6.6994e-05	130.56	1.1014	0.68781	0.63897	0.58748	0.78876	1.2619
IIQDANYNVEK	0	1305.66	IPI00008728	IPI00008728	2	0.0031524	79.82	0.83745	0.81323	1.078	1.1017	0.7891	0.65517
SIVTASPIWASFIESIK	0	1848	IPI00913873;IPI00027034;IPI00913859	IPI00913873	2	5.1821e-06	129.05	1.0771	0.80268	0.74977	0.76906	0.7895	0.98604
FMDQHPEMDFSK	0	1510.62	IPI00550746	IPI00550746	2	3.606e-13	173.19	0.99833	0.85194	0.85615	0.89792	0.79026	0.88118
KYEPPVPTRVGK	1	1369.77	IPI00011126;IPI00848107	IPI00011126	3	0.021159	63.727	0.94237	0.78456	1.0215	0.81318	0.79051	0.91912
WEINSGDGAFYGPK	0	1539.7	IPI00329633;IPI00908949;IPI00910719	IPI00329633	2	5.8832e-05	107.74	0.95765	0.79828	0.84272	0.91608	0.79059	0.87189
AKIEQIFQDEVAK	1	1517.81	IPI00014898;IPI00186711;IPI00398002;IPI00398778;IPI00398777;IPI00398779;IPI00398775;IPI00420096;IPI00398776	IPI00014898	2	2.2645e-14	180.11	0.97427	0.87165	0.91341	1.0451	0.79116	1.0369
ITPRPATRVRPK	0	1390.85	IPI00006038;IPI00337397;IPI00216688;IPI00953181;IPI00337395;IPI00936708;IPI00337396	IPI00006038	3	0.12806	27.914	0.98751	0.8106	0.83945	0.86749	0.79139	1.0489
TIIQNPTDQQK	0	1284.67	IPI00299000;IPI00794875;IPI00807557;IPI00793498	IPI00299000	2	5.5028e-13	176.8	1.1219	0.91768	0.79198	0.72462	0.7914	1.1427
AVIFCISADK	0	1122.57	IPI00473014;IPI00845388	IPI00473014	2	5.7391e-05	146.11	0.91873	0.8498	0.93368	0.92646	0.79181	0.88436
VQGRSEAGAGPGPK	0	1309.67	IPI00030767;IPI00337392	IPI00030767	2,3	9.1929e-10	150.12	0.8974	0.7686	0.85292	0.90881	0.79271	0.96166
SKVDQIQEIVTGNPTVIK	1	1968.09	IPI00009342	IPI00009342	2,3	3.8635e-74	276.4	0.92571	0.74248	0.82811	0.76963	0.79274	1.0415
SAAQARRRIMSGK	0	1430.79	IPI00012074;IPI00941649;IPI00644055;IPI00856038;IPI00910614;IPI00856037	IPI00012074	3	0.076267	40.475	0.93477	0.86987	0.94379	0.65231	0.79279	1.2901
DNPIDPVIAK	0	1080.58	IPI00396321;IPI00968169	IPI00396321	2	0.012706	65.5	0.93413	0.83158	0.84541	0.8228	0.79286	1.0084
RIQAEAEEQK	0	1200.61	IPI00409590;IPI00409591;IPI00409593;IPI00552510;IPI00291802;IPI00641430	IPI00409590	2	0.00058295	104.82	0.86339	0.80461	0.87917	0.81861	0.79346	0.93703
VDIGGFAGIFDIK	0	1350.72	IPI00025273;IPI00384624	IPI00025273	2	6.4458e-10	154.47	0.91797	0.84204	0.9232	0.96934	0.79347	0.80623
GRGITGVEDK	0	1030.54	IPI00643920;IPI00942979;IPI00792641;IPI00940673;IPI00946864	IPI00643920	2	0.00088094	110.84	0.84742	0.77623	0.88387	0.81525	0.79353	1.0378
RNEIVIRVQPNEAVYTK	0	2028.11	IPI00216008;IPI00853547;IPI00289800;IPI00884082	IPI00216008	3	1.0941e-08	143.05	0.93345	0.75852	0.89559	1.019	0.7938	0.83175
SPYQEFTDHIVK	0	1462.71	IPI00013485;IPI00165486;IPI00871956	IPI00013485	2	1.9974e-20	138.02	0.97492	0.85032	0.88344	0.81995	0.79419	0.95913
SGTGIAAMSVMRPEQIMK	0	1905.95	IPI00018855	IPI00018855	2	6.6414e-15	170.61	1.1441	1.0171	0.77973	0.63206	0.79442	1.2573
VTGTIETK	0	847.465	IPI00902560;IPI00216026;IPI00455531;IPI00024145;IPI00917420;IPI00647902;IPI00647442;IPI00844015	IPI00902560	2	0.0023901	95.358	0.8784	0.76881	0.83177	0.84628	0.79448	0.89745
EKFEEMIQQIK	1	1421.72	IPI00010720;IPI00964079;IPI00965269;IPI00964855;IPI00965722;IPI00940257;IPI00909956	IPI00010720	2	3.1061e-07	170.04	0.92782	0.85409	0.89142	0.93485	0.7951	1.0261
NAIESYAFNMK	0	1286.6	IPI00304925;IPI00845339;IPI00909073;IPI00643152;IPI00893099;IPI00939442;IPI00940023;IPI00830052;IPI00911039	IPI00304925	2	6.7626e-65	168.22	1.0136	0.72736	0.69918	0.90942	0.79538	0.87118
VSSAEGAAKEEPK	1	1301.65	IPI00658097;IPI00554761;IPI00894043;IPI00893375;IPI00893633	IPI00658097	2,3	0.00068423	124.42	0.92691	0.7613	0.85778	0.80914	0.79545	1.0157
SDGIYIINIK	0	1134.63	IPI00553164;IPI00847766;IPI00927101;IPI00790580;IPI00413108;IPI00411639;IPI00793137;IPI00745789;IPI00793905;IPI00868885;IPI00946437	IPI00553164	2	0.00064455	117.52	1.0557	0.64994	0.63361	0.6076	0.79547	1.3689
RAVDIIQK	0	941.566	IPI00026215	IPI00026215	2	0.00094606	114.84	0.97126	0.83806	0.84333	0.89531	0.79595	0.90343
AVRAIGRCAIK	0	1213.71	IPI00328257;IPI00413947;IPI00940292;IPI00384489;IPI00946351;IPI00788911;IPI00784366;IPI00784156;IPI00790702	IPI00784366	2	0.00043903	114.4	0.92938	0.83489	0.95856	0.84878	0.79622	0.96275
SGSGTMNIGGSITRQMEK	0	1852.88	IPI00026185;IPI00642256;IPI00218782;IPI00646047;IPI00647677	IPI00026185	2,3	8.4582e-21	188.71	1.2141	0.82761	0.69196	0.69038	0.79626	1.1483
DFETIGQNK	0	1050.5	IPI00021048;IPI00216269;IPI00645867;IPI00385318;IPI00830037;IPI00829909;IPI00479416	IPI00021048	2	0.0014335	98.048	0.92723	0.7039	0.70369	0.81424	0.79642	0.93703
NIHPWVK	0	892.492	IPI00889534;IPI00011062;IPI00397498	IPI00889534	2	0.021442	68.422	1.1622	1.0253	0.68341	0.57091	0.79677	1.3965
IEEENRSIK	0	1116.58	IPI00642984;IPI00218200;IPI00641554	IPI00642984	2	0.00072227	104.2	0.92667	0.68611	0.74263	0.74773	0.79733	0.99663
SAVEAQNEVTENPK	0	1514.72	IPI00785113;IPI00006207;IPI00382733	IPI00785113	2	9.406e-43	242.91	1.1314	0.7821	0.68794	0.69697	0.79749	1.0806
SSSQIPAQPSVAK	0	1298.68	IPI00083708;IPI00739117;IPI00902898;IPI00852708;IPI00902809;IPI00941219;IPI00148247;IPI00946618;IPI00941970;IPI00902970;IPI00910607	IPI00083708	2	0.0046682	74.475	1.245	0.83737	0.70428	0.59267	0.79769	1.2564
DFNRAFGFMTRVAIQAEK	0	2100.06	IPI00218568	IPI00218568	3	0.087424	38.889	0.93606	0.73877	0.88085	0.96967	0.79775	0.96929
TCTTVAFTQVNSEDK	0	1699.77	IPI00299573;IPI00397676;IPI00642454	IPI00299573	2	3.2281e-55	254.56	0.97094	0.75241	0.793	0.74373	0.7982	1.0636
NISDIIDIVPSICEDIISSVDQPIK	0	2782.43	IPI00026185;IPI00642256;IPI00646047;IPI00647677	IPI00026185	2,3	1.1339e-71	160.36	1.0124	1.339	1.3168	0.8533	0.79829	0.95734
SIEIPRPVDGVEVPGCGK	0	1907.98	IPI00031556;IPI00830039	IPI00031556	2,3	1.6126e-20	185.33	1.0178	0.79982	0.83118	0.76496	0.79858	1.0029
VHVCGQTHRTRIK	0	1590.85	IPI00021048;IPI00216269;IPI00645867;IPI00385318;IPI00830037;IPI00216268;IPI00829909	IPI00021048	3	0.12727	29.299	1.0268	1.1262	0.99762	0.97399	0.7986	0.97703
INTIIQRAPQCIGK	0	1610.89	IPI00479217;IPI00644224;IPI00883857;IPI00644079	IPI00883857	2,3	3.7876e-30	208.15	0.91297	0.74625	0.83225	0.79023	0.799	1.0389
GSIGQGTAPVIPGK	0	1280.71	IPI00815713;IPI00815944;IPI00815731;IPI00965339;IPI00914061;IPI00165041;IPI00941770;IPI00969501;IPI00298696;IPI00555853;IPI00909120	IPI00815713	2	1.6909e-53	166.03	0.88451	0.70991	0.89337	0.85097	0.79904	0.95935
RAAEEEDEADPK	0	1358.6	IPI00550020;IPI00830138;IPI00815656	IPI00550020	2	0.043029	51.211	0.84206	0.83854	0.95379	0.87494	0.79921	0.88459
AVGPEITK	0	813.46	IPI00554737;IPI00908543;IPI00910732;IPI00168184;IPI00798040	IPI00554737	2	0.0050337	90.657	1.0427	0.84705	0.80843	0.88509	0.79952	0.95131
KAEGGGGGGRPGAPAAGDGK	1	1665.82	IPI00883857;IPI00644079	IPI00883857	3	0.00034305	83.37	0.7742	0.92157	1.0738	1.0366	0.79995	0.74037
EKPVCGTTYK	0	1181.58	IPI00783872;IPI00873926	IPI00783872	2	0.00093559	109.42	0.81753	0.79869	0.86751	0.90421	0.8	0.83756
FIEHISGAGK	0	1057.56	IPI00009790	IPI00009790	2	0.00010074	140.16	1.0766	0.75206	0.82719	0.82018	0.80012	1.0126
WGTITDCVVMRDPQTK	0	1905.91	IPI00419373;IPI00455134;IPI00939124;IPI00909208;IPI00927677;IPI00927407;IPI00927189	IPI00419373	2,3	6.0387e-10	149.3	0.89281	0.80167	0.9015	0.86226	0.80022	0.95933
IVIVGDGGTGK	0	1014.57	IPI00792352;IPI00796462;IPI00795671;IPI00643041;IPI00044779	IPI00792352	2	2.2389e-08	156.58	0.85234	0.83851	0.95232	0.97752	0.80023	0.89135
EHYVDIK	0	902.45	IPI00604590;IPI00795292;IPI00790982;IPI00375531;IPI00012048	IPI00604590	2	0.04848	54.408	1.0651	0.88939	0.80999	0.75554	0.80041	0.90187
EAQDDIVK	0	916.45	IPI00843975;IPI00872684	IPI00843975	2	0.0059173	88.681	0.9355	0.97792	0.95396	0.83239	0.80071	0.83075
IAQMFSDMVIK	0	1281.65	IPI00022462;IPI00924935	IPI00022462	2	0.00063749	103.44	0.86788	0.70888	0.8517	0.99426	0.80097	0.81679
ENVNATENCISAVGK	0	1604.75	IPI00939304;IPI00793443;IPI00937471	IPI00939304	2	4.5668e-43	242.48	0.94563	0.80504	0.84429	0.85747	0.80102	0.94649
RETGVDITK	0	1017.55	IPI00007765;IPI00922694	IPI00007765	2	0.0030573	84.658	1.0364	0.85588	0.82929	0.84212	0.80107	1.1167
DWRPAITIK	0	1098.62	IPI00450472;IPI00032957	IPI00450472	2	0.073669	38.776	0.89899	0.76764	0.82444	0.89594	0.8011	0.89061
VAINMARGIK	0	1071.62	IPI00306708	IPI00306708	2	0.00038965	111.61	0.88008	0.98053	1.0899	0.88434	0.8013	0.81544
VTCRGIIEYFK	0	1384.72	IPI00845461;IPI00550523	IPI00845461	2	0.00066485	101.93	0.98081	0.92859	0.92964	0.97098	0.80154	0.85496
KAPPPPPTSMPK	1	1246.67	IPI00641384;IPI00031242;IPI00166487;IPI00896436;IPI00219314;IPI00872611;IPI00167711	IPI00641384	2	0.0020149	90.653	0.93945	0.6811	0.79454	0.87172	0.80214	0.98455
SSQEEVRSYSDPPIK	0	1720.83	IPI00003881	IPI00003881	2,3	4.5132e-05	118.37	1.0734	0.69488	0.64085	0.69922	0.80223	1.145
SGTEREFRGIGDCIVK	0	1822.9	IPI00291467	IPI00291467	2,3	0.00096378	94.551	1.0764	0.76443	0.73509	0.68311	0.80267	1.1695
SIIRDAISDIAIHFINK	0	1925.07	IPI00302927;IPI00893358;IPI00921414	IPI00302927	3	1.0514e-47	246.96	1.0557	0.75498	0.77945	0.70532	0.80285	1.1018
TDTVIIICRK	0	1217.68	IPI00395627;IPI00552308;IPI00940004	IPI00395627	2	0.0010209	107.21	1.0099	0.81828	0.75144	0.56403	0.80299	1.3798
ARMGVVECAK	0	1119.55	IPI00299000;IPI00794875;IPI00807557;IPI00798341	IPI00299000	2	6.6936e-06	140.07	0.95383	0.80503	0.89034	0.87463	0.803	0.97318
ISSGNEENKKEEDNDEIK	2	2076.94	IPI00015897;IPI00885057	IPI00015897	3	0.00022512	113.65	0.89578	0.81064	0.94358	0.95485	0.8031	0.88166
MVAAVACAQVPK	0	1243.64	IPI00784044;IPI00789428;IPI00967193;IPI00968098	IPI00784044	2	5.4415e-20	198.87	0.92232	0.6652	0.72182	0.78304	0.80313	1.0204
AKPSPAPPSTTTAPDASGPQK	0	2005.01	IPI00441867;IPI00642757;IPI00922422	IPI00441867	3	9.5405e-13	135.29	0.97887	0.91355	0.8531	1.077	0.80349	0.73461
SVARRVIQAIEGIK	0	1538.93	IPI00215780	IPI00215780	2,3	4.9293e-05	110.51	1.1603	0.68629	0.64509	0.65457	0.80352	1.1814
ESKDPADETEAD	1	1305.52	IPI00479997	IPI00479997	2	0.00023565	145.28	0.85869	0.7927	0.90386	0.8725	0.80365	0.89165
SSSPAPADIAQTVQEDIRTFSWASVTSK	0	2978.46	IPI00012442	IPI00012442	3	2.4864e-21	137.72	1.0912	0.80452	0.75321	0.73671	0.80394	1.1286
FIVHNVK	0	855.497	IPI00927658;IPI00395998;IPI00927458;IPI00794734;IPI00927895;IPI00878895	IPI00927658	1,2	0.0080237	86.866	0.99593	0.90074	0.93177	0.88298	0.80424	0.97304
DVFRDPAIK	0	1059.57	IPI00219155;IPI00790294	IPI00219155	2	0.0026958	87.639	1.0403	0.97248	0.91803	0.86129	0.80457	0.94982
FAEYGEIK	0	955.465	IPI00001757;IPI00216659	IPI00001757	2	0.0058555	88.819	0.99325	0.87112	0.88674	0.8862	0.80457	1.0011
SIESINSRIQIVMK	0	1616.89	IPI00219156;IPI00794121;IPI00794745	IPI00219156	2	1.2205e-07	151.99	1.1131	0.77175	0.7566	0.77008	0.8046	1.036
KTQDQISNIK	1	1173.64	IPI00000861;IPI00386803;IPI00952738;IPI00883946;IPI00909678	IPI00000861	2	0.0071451	76.332	0.91405	0.79866	0.86396	0.72139	0.80474	1.127
YVAEIEK	0	850.444	IPI00024175;IPI00218372;IPI00647380	IPI00024175	2	0.021234	67.981	0.90875	0.72988	0.79076	0.83888	0.80474	0.8476
RAQSEIAAHQK	0	1237.65	IPI00472442;IPI00016832;IPI00910408;IPI00910833	IPI00472442	3	0.00035378	110.08	0.87841	0.75069	0.80629	0.88263	0.80487	0.91645
FAGGIHFSGPK	0	1116.57	IPI00021812;IPI00555610	IPI00021812	2	0.0048058	76.332	1.0724	0.93552	0.8735	0.82933	0.80546	0.96038
VVITRIK	0	827.559	IPI00027270;IPI00433834;IPI00007144	IPI00027270	2	0.0023069	100.45	0.92068	0.99403	1.0984	0.81343	0.80574	1.0229
SVVIMSHIGRPDGVPMPDK	0	2034.04	IPI00169383	IPI00169383	2,3	4.851e-81	275.91	1.0691	0.89465	0.8035	0.74688	0.80586	1.1206
EQADFAIEAIAK	0	1304.66	IPI00019502;IPI00395772;IPI00926581;IPI00941217;IPI00607818;IPI00337335;IPI00607778;IPI00029818	IPI00019502	2	0.0018566	86.756	0.92476	0.89322	1.0481	1.0402	0.8061	0.79757
YIIPNATQPESK	0	1359.7	IPI00216318;IPI00759832	IPI00216318	2	3.5095e-09	160.52	0.86281	0.70428	0.89938	0.93172	0.80645	0.87571
RTYEEGIK	0	994.508	IPI00013894;IPI00479946	IPI00013894	2	0.030267	57.598	0.92696	0.80972	0.83389	0.826	0.8065	0.92912
GISRDNWHK	0	1111.55	IPI00216587;IPI00645201	IPI00216587	2	0.087176	34.532	0.92896	0.80984	0.8381	0.86297	0.80651	0.99961
KVQAAQSEAK	1	1058.57	IPI00009960;IPI00554469;IPI00470829;IPI00926611;IPI00940432;IPI00925553	IPI00009960	2	0.028101	57.785	0.89358	0.88059	1.0103	0.98323	0.80678	0.85273
EFSGNPIK	0	890.45	IPI00260715;IPI00221354;IPI00941083;IPI00645208;IPI00909890;IPI00428056;IPI00854677	IPI00260715	1,2	2.7622e-17	143.61	0.91082	0.75677	0.86726	0.8007	0.80746	1.0381
ANIEAFTVDK	0	1106.56	IPI00012837	IPI00012837	2	0.0070623	72.652	0.96645	1.1484	1.0502	0.89281	0.80784	0.91278
AEDGATPSPSNETPKK	1	1627.77	IPI00219301	IPI00219301	3	2.9043e-10	153.7	0.96954	0.83341	0.86871	0.90491	0.80796	0.96166
VCARGEIIGVK	0	1200.66	IPI00015018;IPI00643288	IPI00015018	2	5.2189e-19	198.81	0.94244	0.83744	0.89287	0.9792	0.80858	0.84065
IEAAIGEAK	0	900.492	IPI00216952;IPI00021405;IPI00216953;IPI00644087;IPI00514320;IPI00514817;IPI00655812;IPI00965833;IPI00514204;IPI00910241;IPI00965567	IPI00216952	2	1.2465e-05	132.01	0.92864	0.86532	0.93618	0.90019	0.80903	0.92209
SQIFSTASDNQPTVTIK	0	1835.93	IPI00003362	IPI00003362	2	1.3711e-174	375.83	1.052	0.74099	0.72802	0.7208	0.80914	1.144
YIQAEPPTNK	0	1159.59	IPI00216047;IPI00150057;IPI00789967;IPI00470387	IPI00216047	2	0.016591	60.255	0.90848	0.89776	0.97732	0.81352	0.80952	1.0246
QDIPNAMAISEMTDK	0	1662.76	IPI00215918;IPI00946929	IPI00215918	2	1.5554e-31	150.39	0.8199	0.83298	0.93179	0.77837	0.80975	1.0096
QVAPEKPVK	0	994.581	IPI00221222;IPI00455831;IPI00963960;IPI00964232	IPI00221222	2	2.2731e-06	142.43	0.92285	0.79926	0.94384	0.6939	0.80987	1.125
IIEIARK	0	841.539	IPI00145593;IPI00917856	IPI00145593	2	0.0036533	94.262	0.91686	0.78232	0.8143	0.89138	0.81015	0.8882
AMEAVAAQGK	0	974.486	IPI00453476;IPI00549725;IPI00218570;IPI00844133;IPI00847670;IPI00930416	IPI00453476	2	0.00023201	123.75	0.96173	0.91585	0.94289	0.84453	0.81018	0.9544
ASIQAASAESSGQK	0	1333.65	IPI00290410;IPI00921860	IPI00290410	2	5.8004e-05	107.98	0.8327	0.76385	0.92951	0.91925	0.81024	0.90188
AEGSEIRIAK	0	1072.59	IPI00010796;IPI00878551;IPI00911004	IPI00010796	2	0.0059002	75.387	0.90153	0.83794	0.84493	0.92748	0.81033	0.87629
IVVIGSGGVGK	0	984.597	IPI00015148;IPI00019345;IPI00877120;IPI00796349;IPI00816182;IPI00942831;IPI00908754	IPI00015148	2	0.0021784	83	0.9171	0.83535	0.91585	1.053	0.81093	0.83729
GIHPTIISESFQK	0	1455.77	IPI00302927;IPI00893358;IPI00921414	IPI00302927	2,3	0.000157	117.86	1.2206	0.85796	0.70293	0.69702	0.81099	1.279
ANTNEVIWAVVAAFTK	0	1732.91	IPI00005490	IPI00005490	2,3	2.435e-15	167.82	1.0007	0.80625	0.91381	0.88585	0.81103	0.9532
VIENRAIKDEEK	1	1442.77	IPI00967467;IPI00218319;IPI00909961;IPI00479185;IPI00382894;IPI00218320;IPI00643370;IPI00183968;IPI00477649;IPI00645055;IPI00647245	IPI00967467	2,3	1.0136e-36	231.67	1.0655	0.81614	1.0147	0.89159	0.81158	0.98445
SSEHINEGETAMIVCK	0	1803.81	IPI00218019;IPI00019906;IPI00394877	IPI00218019	2,3	2.2835e-92	308	1.1209	0.73536	0.63307	0.63826	0.81166	1.2409
YMEENDQIK	0	1168.51	IPI00642984;IPI00218200;IPI00641554;IPI00639976;IPI00646739	IPI00642984	2	5.1431e-05	123.35	0.98422	0.80973	0.77109	0.85587	0.8123	0.96098
YRGQHVTGSPFQFTVGPIGEGGAHK	0	2626.3	IPI00900293;IPI00289334;IPI00477536;IPI00943563;IPI00382697;IPI00953109;IPI00940093;IPI00945610;IPI00798140	IPI00900293	3	0.0067756	66.137	0.78852	0.97775	1.2614	1.092	0.8123	0.77822
DVPDHAVIEMK	0	1252.61	IPI00013070;IPI00167147;IPI00736859;IPI00402391	IPI00013070	2	0.034764	50.284	0.96603	0.85938	0.88094	0.94319	0.81269	0.95626
DIAAYRAK	0	906.492	IPI00219097;IPI00419258;IPI00018755;IPI00903004;IPI00742929;IPI00788220;IPI00737736	IPI00419258	2	1.9307e-05	133.12	0.90435	0.7486	0.8593	0.8595	0.813	1.0414
FNECGHVIYADIK	0	1564.73	IPI00171903;IPI00383296	IPI00171903	2	3.4934e-07	140.96	0.94383	0.78009	0.82509	0.75577	0.8131	1.1061
AGEVFIHK	0	899.486	IPI00304596;IPI00922367;IPI00645010;IPI00644848;IPI00645966	IPI00304596	2	2.667e-05	128.69	0.95348	0.86726	0.91087	0.91977	0.81313	0.95476
SIAPSIHGHDYVK	0	1422.73	IPI00013214;IPI00940786	IPI00013214	3	4.4841e-06	136.38	1.1002	0.79012	0.69009	0.71596	0.81343	1.2806
IIQYCQSK	0	1038.52	IPI00413641;IPI00556258;IPI00879481	IPI00413641	2	0.048164	51.066	0.92966	0.83776	0.83816	0.96596	0.81383	0.89882
TVWEISQK	0	989.518	IPI00013871;IPI00943207	IPI00013871	2	0.029433	58.433	1.0183	0.74585	0.67037	0.70548	0.81387	1.0993
MVINHIEK	0	982.527	IPI00784090;IPI00302925;IPI00797206	IPI00784090	2	2.6245e-08	154.49	1.0873	1.0326	0.98553	1.0021	0.81415	0.87785
INERIAK	0	842.497	IPI00784154;IPI00917575;IPI00880053	IPI00784154	2	0.00034105	114.5	0.92661	0.69542	0.7213	0.74062	0.81424	1.1383
IEGFHTQISK	0	1158.6	IPI00748256;IPI00479722	IPI00748256	2	0.0013857	97.734	1.0413	0.80913	0.81031	0.80771	0.81476	1.096
AYGQAIAK	0	820.444	IPI00643920;IPI00942979;IPI00792641;IPI00940673;IPI00793119;IPI00789310	IPI00643920	2	2.2292e-11	136.16	1.0215	0.85634	0.95566	0.89368	0.81487	0.95174
AQPAQPADEPAEK	0	1350.64	IPI00472442;IPI00016832	IPI00472442	2	1.2103e-15	182.89	0.92212	0.77659	0.81415	0.89264	0.81494	1.0249
ISDSEGFK	0	881.413	IPI00010740;IPI00216613	IPI00010740	2	0.0035133	88.819	0.94874	0.85866	0.93948	0.97759	0.81494	0.92672
AVAEVSESTK	0	1019.51	IPI00412499;IPI00412500;IPI00479273	IPI00412499	2	1.9756e-05	130.94	0.80286	0.73011	0.89235	0.82219	0.81514	0.88766
TGISDVFAK	0	936.492	IPI00604620;IPI00444262	IPI00604620	2	1.6724e-12	175.91	1.0924	0.7432	0.73498	0.69044	0.8154	1.3049
GKIEAIITPPPAK	1	1333.8	IPI00304171;IPI00059366;IPI00744148;IPI00966623	IPI00304171	2	7.1093e-05	147.35	0.90623	0.77275	0.89948	0.9278	0.8154	0.97149
ITDCVVMRDPASK	0	1490.72	IPI00396378;IPI00916517;IPI00414696	IPI00396378	2,3	1.7216e-22	203.87	0.96518	0.839	0.90453	0.89496	0.81541	0.87634
EAPAQPAPEK	0	1036.52	IPI00017341	IPI00017341	2	9.7956e-07	158.3	1.0024	0.75331	0.80853	0.91776	0.81544	0.8694
QRIIARAEK	0	1083.65	IPI00299573;IPI00478896	IPI00299573	2	0.0024561	94.85	1.0525	0.82773	0.76783	0.92421	0.81608	0.88266
IVMTAAAK	0	803.458	IPI00018031;IPI00555728;IPI00166751;IPI00306044	IPI00018031	1	0.00559	92.925	0.94998	0.88383	0.99046	0.92352	0.81632	0.8655
DISISDYK	0	939.455	IPI00000874;IPI00640741	IPI00000874	2	2.0085e-37	126.41	0.94451	0.81848	0.88084	0.9462	0.81674	0.87647
AAVAATAAAK	0	843.481	IPI00384497	IPI00384497	2	5.5549e-30	175.93	0.93924	0.89483	0.90432	0.88589	0.81691	0.93858
AYFHIINQIAPK	0	1413.78	IPI00216694;IPI00947227;IPI00947454;IPI00032304	IPI00216694	2	4.0876e-79	179.57	1.1432	0.84102	0.76301	1.0198	0.81702	0.80981
GGGAISAVAATK	0	1001.55	IPI00009822;IPI00929464;IPI00736168	IPI00009822	2	0.00075622	98.407	1.0609	0.89451	0.88436	0.78615	0.81706	1.0919
VNEIRAFVK	0	1074.62	IPI00032826;IPI00793211;IPI00168839	IPI00032826	2	4.391e-08	144.77	0.93609	0.78694	0.84942	0.91683	0.81716	0.97666
QVHPDTGISSK	0	1167.59	IPI00003935;IPI00152785;IPI00220403;IPI00515061;IPI00465363;IPI00646240;IPI00794461;IPI00930174;IPI00020101;IPI00152906;IPI00303133;IPI00329665;IPI00419833;IPI00554798;IPI00815755;IPI00018534;IPI00477495;IPI00930570	IPI00646240	2,3	7.4757e-13	173.64	1.0823	0.76012	0.71844	0.6833	0.81755	1.2688
CIAAIASIRHAK	0	1309.73	IPI00418313;IPI00298788;IPI00414335;IPI00556173;IPI00298789;IPI00219330;IPI00556364	IPI00418313	2	1.0287e-65	174.24	1.0665	0.72609	0.64941	1.0992	0.8176	0.74433
DTEPIIQTAK	0	1114.59	IPI00010720;IPI00964079;IPI00965269;IPI00964855;IPI00965722;IPI00940257	IPI00010720	2	1.0998e-06	156.48	0.99112	0.90394	0.9396	0.71345	0.81764	1.1446
DTICNQDERISK	0	1477.68	IPI00867509;IPI00943173;IPI00798401;IPI00797709	IPI00867509	2	1.0238e-05	126.12	1.023	0.8412	0.72592	0.80166	0.81766	1.0449
RIVIQDK	0	870.529	IPI00000494	IPI00000494	2	0.024683	64.265	0.90726	0.76868	0.85524	0.87733	0.81786	0.93289
REATADDIIK	0	1130.59	IPI00293464;IPI00909008;IPI00909251;IPI00909177	IPI00293464	2	0.04767	45.879	0.98549	0.89587	0.8185	0.9024	0.81789	0.91023
ADEASEIACPTPK	0	1387.63	IPI00026781	IPI00026781	2	3.0744e-65	169.62	1.1685	0.93792	0.78988	1.4394	0.818	0.58034
VDGRVVEPK	0	997.556	IPI00215965;IPI00760620;IPI00465365;IPI00644968;IPI00797148;IPI00879501;IPI00797902;IPI00908994;IPI00742127;IPI00909288;IPI00869068;IPI00419373;IPI00455134;IPI00939124;IPI00909208;IPI00927677;IPI00927407;IPI00470658	IPI00419373	2	0.010967	72.321	0.95679	0.85876	0.8741	1.0012	0.8181	0.96159
FRSNIPAK	0	931.524	IPI00029731;IPI00879894	IPI00029731	2	0.00070527	109.11	0.88043	0.77088	0.88855	0.80741	0.81843	1.0231
RIEAFITQK	0	1104.63	IPI00003783;IPI00419792;IPI00219604;IPI00797850	IPI00219604	2	0.00057274	108.47	0.92938	0.8537	0.97225	1.1397	0.81845	0.71168
YIPEIMAEK	0	1092.55	IPI00008575;IPI00479209;IPI00385834;IPI00082310;IPI00166708;IPI00903310;IPI00008570;IPI00744983	IPI00008575	2	0.0069565	76.679	0.96475	0.87545	0.84357	0.92209	0.81881	0.85661
AAVEWFDGK	0	1021.49	IPI00009841;IPI00872855;IPI00879259;IPI00879242;IPI00065554;IPI00293254;IPI00953325;IPI00878484	IPI00009841	2	0.00018012	136.32	0.98993	0.74097	0.81178	0.88607	0.81896	0.85259
AYSEAHEISK	0	1133.54	IPI00220642;IPI00910779	IPI00220642	2	1.4746e-07	170.89	1.1491	0.8799	0.81601	0.83293	0.81916	1.0511
KVPVSVNIISK	1	1182.73	IPI00008708;IPI00642046	IPI00008708	2	0.0045368	80.979	0.87869	0.81715	0.9552	0.91427	0.81936	0.88818
IRAAEQYTPK	0	1175.63	IPI00026781	IPI00026781	2	0.0018969	93.096	0.88295	0.77456	0.91167	1.0104	0.81948	0.876
DGIIICEIINK	0	1286.69	IPI00216682;IPI00909623;IPI00642542	IPI00216682	2	0.0016459	88.596	0.807	0.76294	1.0263	0.89661	0.81962	0.96025
IDSSPSVSSTIAAK	0	1361.7	IPI00815713;IPI00815944;IPI00815731;IPI00965339;IPI00914061;IPI00165041;IPI00941770;IPI00969501;IPI00298696	IPI00815713	2	0.041154	78.486	0.94689	29.772	31.094	0.89531	0.81968	0.92085
EGAITAFRK	0	991.545	IPI00793381;IPI00014151;IPI00794383;IPI00946249;IPI00795037;IPI00945689;IPI00794344	IPI00793381	2	0.0063961	78.939	1.0559	0.79631	0.743	0.80481	0.81977	1.0188
KITEAMGGGWQQEQFEHYK	1	2266.05	IPI00307200;IPI00903155	IPI00307200	3	1.1044e-11	145.69	0.7357	0.6804	0.99612	0.9732	0.82002	0.97599
DIREEAEK	0	988.483	IPI00419249;IPI00171199	IPI00419249	2	0.08075	39.022	0.86075	0.71765	0.82574	0.83082	0.82029	0.92252
VTTHPIAK	0	865.502	IPI00298547	IPI00298547	2	0.00038337	116.37	0.88331	0.82707	0.88905	0.91437	0.82035	0.83378
DQIPADECNK	0	1188.51	IPI00007765;IPI00922694	IPI00007765	2	0.00033914	127.83	0.9551	0.77189	0.76051	0.87942	0.82093	0.96937
ATPMPSRPSTTPFIDK	0	1744.88	IPI00880007;IPI00396171;IPI00888475;IPI00878314;IPI00220113;IPI00927819;IPI00411375;IPI00924603;IPI00743873;IPI00878651;IPI00043863;IPI00927173;IPI00910596	IPI00880007	2	0.00018888	107.82	1.0142	0.98632	0.96256	0.96333	0.82102	0.87761
KIGEMWSEQSAK	1	1392.67	IPI00219097	IPI00219097	2	0.00023065	124.51	0.95652	0.90399	0.93206	0.88675	0.82105	0.94649
RDITRFVK	0	1033.6	IPI00299573;IPI00397676;IPI00478896	IPI00299573	2	0.0018497	105.14	1.0124	0.84523	0.82172	0.82899	0.82112	0.92854
EHVIEAIRRAK	0	1320.76	IPI00554723;IPI00853161;IPI00646899;IPI00064765;IPI00893680;IPI00894025	IPI00554723	2,3	8.9859e-06	147.74	0.96159	0.81569	0.91515	0.85507	0.82114	1.0205
DIVIVAYSAIGSQRDK	0	1733.93	IPI00291483	IPI00291483	2	2.9567e-26	196.67	0.83093	0.76486	0.96518	1.0189	0.82148	0.81237
QRQIAEAHAQAK	0	1349.72	IPI00014898;IPI00186711;IPI00398002;IPI00398778;IPI00398777;IPI00398779;IPI00398775;IPI00420096;IPI00398776	IPI00014898	3	2.1952e-09	162.26	0.81096	0.79294	1.0858	0.96538	0.82172	0.98607
RGPPPRSGGPPPK	0	1298.72	IPI00304692;IPI00816796;IPI00939558	IPI00304692	2,3	0.00043244	101.89	0.95675	0.87199	0.83644	0.85283	0.8222	0.95288
IIFVGRAQK	0	1030.63	IPI00642904;IPI00012726;IPI00555747;IPI00642944;IPI00885166;IPI00973757	IPI00642904	2	0.00019434	119.27	0.82298	0.7933	1.0208	0.97376	0.82221	0.85956
YIDQEEINK	0	1150.55	IPI00414676;IPI00455599;IPI00382470;IPI00784295;IPI00604607;IPI00031523	IPI00382470	2	3.0581e-18	194.06	0.9675	0.75474	0.80856	0.92797	0.82244	0.93967
DCEAEVRAAASHK	0	1442.66	IPI00554737;IPI00908543;IPI00910732;IPI00168184;IPI00798040	IPI00554737	2,3	0.00031866	101.39	0.9156	0.77558	0.8415	0.83548	0.82281	0.96773
TAVCDIPPRGIK	0	1325.71	IPI00013475;IPI00031370;IPI00930715;IPI00974224;IPI00956734;IPI00909140;IPI00645452;IPI00647896;IPI00953417;IPI00908770;IPI00174849;IPI00292496;IPI00514047;IPI00945532;IPI00007752;IPI00930130;IPI00023598;IPI00926685;IPI00956241	IPI00007752	2,3	0.0015245	89.171	1.0391	0.83049	0.80748	0.74154	0.82301	1.1748
AIVNVIGMHK	0	1080.61	IPI00026089	IPI00026089	2	0.0042013	78.655	0.88095	0.86023	0.95103	0.85214	0.82301	0.96954
AAIRYAAVRTINK	0	1445.85	IPI00783982	IPI00783982	2	4.5051e-05	130.1	0.91237	0.86282	0.95257	0.9168	0.82306	0.88524
YEIGRPAANTK	0	1218.64	IPI00216587;IPI00645201	IPI00216587	2	3.4995e-19	205.56	1.0214	0.82065	0.77242	1.0177	0.82308	0.88747
ERIYPIRK	0	1073.63	IPI00412607	IPI00412607	2	0.013628	71.501	0.93186	0.8753	0.92026	0.90314	0.82315	0.8905
IREDIERIK	0	1170.67	IPI00013296;IPI00397609;IPI00790711	IPI00013296	2,3	9.0031e-06	138.22	0.88707	0.85833	0.89093	0.88178	0.8234	0.96909
DRIIASTIVHSVK	0	1437.83	IPI00006079;IPI00413671;IPI00886854;IPI00413672;IPI00886987;IPI00413673	IPI00006079	2	0.043416	50.088	0.9889	0.80173	0.97897	1.0558	0.82376	0.85325
MIPRDERRFK	0	1346.72	IPI00015842	IPI00015842	2,3	0.0036194	80.755	0.86584	0.82133	0.99613	0.95227	0.82428	0.93139
SPAVKPAAAPK	0	1035.61	IPI00908873;IPI00216654;IPI00292387	IPI00908873	2	2.9516e-05	127.87	0.87016	0.56256	0.62941	1.1626	0.82432	0.76912
SEREIIEIVK	0	1214.69	IPI00010157;IPI00916229;IPI00909932;IPI00909877	IPI00010157	2	0.0040411	79.659	1.1552	0.71994	0.66079	0.6843	0.82437	1.17
YTCSFCGK	0	1021.4	IPI00414860;IPI00926175;IPI00926815;IPI00924813;IPI00477215	IPI00414860	2	0.0077876	84.498	0.99411	0.82886	0.83123	0.79201	0.82453	1.0144
KIGEMWNNTAADDK	1	1591.73	IPI00419258;IPI00645948;IPI00644653;IPI00018755;IPI00903004;IPI00742929;IPI00788220;IPI00737736;IPI00022796;IPI00879051	IPI00419258	2	3.4112e-10	159.13	0.90893	0.89217	0.98225	0.9492	0.82476	0.8911
ITGSVIEDAWK	0	1217.63	IPI00021466;IPI00337775;IPI00386299;IPI00455339;IPI00967955	IPI00021466	2	0.0018886	88.338	1.0012	0.886	0.88044	0.92524	0.82477	0.96568
RAAEDDEDDDVDTKK	1	1720.74	IPI00917228;IPI00385149;IPI00917401;IPI00973572;IPI00916962;IPI00827535;IPI00455510;IPI00479214;IPI00940842;IPI00916480;IPI00916955	IPI00917228	2,3	2.5583e-69	278.2	0.88819	0.80746	0.92806	0.88278	0.8249	0.90992
TVGVEPAADGK	0	1042.53	IPI00914529;IPI00910727;IPI00182533;IPI00816097;IPI00914543	IPI00914529	2	5.1045e-13	177.44	1.0175	0.75128	0.70032	0.74976	0.82513	1.3643
QVIIGRK	0	812.523	IPI00304612;IPI00398983;IPI00909017	IPI00304612	2	0.0024861	99.171	0.97445	0.78302	0.76333	0.77009	0.82562	1.024
STGCDFAVSPK	0	1167.52	IPI00026516;IPI00964493;IPI00967390	IPI00026516	2	0.010994	62.466	1.0605	0.78572	0.72584	0.7092	0.82583	1.3023
ISVNSHFMK	0	1061.53	IPI00022442	IPI00022442	2	0.0012	99.973	0.98342	0.83126	0.84217	0.90303	0.82593	0.97016
SVFIIGASGETGRVIIK	0	1746	IPI00847689;IPI00784029;IPI00383665	IPI00847689	2	0.00037499	87.138	1.0635	0.76481	0.70863	0.67479	0.82607	1.1897
INISFPATGCQK	0	1334.67	IPI00021840;IPI00640929	IPI00021840	2	2.8586e-05	133.32	0.91466	0.83777	0.90042	0.90968	0.82613	0.91865
RIVEGIIK	0	926.591	IPI00410162;IPI00026670;IPI00917694	IPI00410162	2	0.0032295	94.692	0.96381	0.76214	0.8484	0.91154	0.82616	1.0152
RIEEPEEPK	0	1125.57	IPI00290461;IPI00910728	IPI00290461	2	0.007178	77.379	1.0561	0.93265	0.84933	0.91245	0.82617	0.96263
AFEIMHSGK	0	1018.49	IPI00746777	IPI00746777	2	0.0049741	85.533	0.95488	0.7911	0.84344	0.85848	0.82655	0.93504
AARDIFNK	0	933.503	IPI00902560;IPI00216026;IPI00455531;IPI00024145;IPI00917420;IPI00647902;IPI00647442;IPI00844015	IPI00902560	2	3.9877e-08	146.81	0.95719	0.84596	0.87617	0.92221	0.82655	0.90061
SAISGHIETVIIGIIK	0	1649.97	IPI00418169;IPI00455315;IPI00334627;IPI00797556;IPI00909509	IPI00418169	2,3	3.2592e-91	303.36	1.1047	0.76272	0.67874	0.70258	0.82662	1.2052
IPIEPRFGK	0	1055.61	IPI00844578	IPI00844578	2	0.049866	46.891	0.92521	0.8212	0.92312	0.88048	0.82673	0.91045
SQQERDWVINEFK	0	1677.81	IPI00017617;IPI00798375	IPI00017617	2	2.0778e-14	178.67	1.0674	0.78337	0.72985	0.76855	0.82683	1.0196
SIEEIYIFSIPIK	0	1550.86	IPI00013485;IPI00165486;IPI00386445;IPI00955904;IPI00878297	IPI00013485	2	4.0967e-11	169.62	0.96167	0.81387	0.83165	0.78679	0.82708	1.0633
EMWTEVPK	0	1018.48	IPI00017963;IPI00930678	IPI00017963	2	0.00037608	133.23	1.0454	0.932	0.85605	0.86223	0.82741	1.0354
IQRQIDEPK	0	1125.61	IPI00012079;IPI00942600;IPI00908588;IPI00798302;IPI00910983	IPI00012079	2	0.010452	72.928	0.99662	0.85348	0.85318	0.7979	0.82813	0.92229
AIDIDSSCK	0	1007.46	IPI00013894;IPI00479946;IPI00908463	IPI00013894	2	0.013544	69.275	0.96964	0.90768	0.98034	0.97892	0.82814	0.92402
QNIEGDHSDAPMETETSFK	0	2134.91	IPI00964409;IPI00295485;IPI00964684	IPI00964409	3	0.012012	77.324	0.86298	0.83764	1.1063	0.90549	0.82827	0.99207
IRVVINK	0	840.555	IPI00017184;IPI00657915;IPI00853165;IPI00005578;IPI00853100;IPI00100980	IPI00017184	2	0.00038471	114.19	0.8898	0.87623	0.9826	0.99564	0.82866	0.83321
VCNYGITFTQK	0	1329.64	IPI00294779;IPI00031804;IPI00973955	IPI00294779	2	0.0022632	85.813	0.86622	0.82692	0.92798	0.98212	0.82887	0.83166
KAEGAATEEEGTPK	1	1416.67	IPI00299024;IPI00908521	IPI00299024	2,3	8.0945e-22	188.39	0.84741	0.81888	0.94733	0.92708	0.82915	0.98711
EEFTSGGPIGQK	0	1248.6	IPI00218728;IPI00873228;IPI00953036;IPI00760905	IPI00218728	2	8.0493e-06	130.1	1.0139	0.9283	0.95696	0.85807	0.82923	0.93849
AQAIRIASHINIAMCHIK	0	2046.1	IPI00219005	IPI00219005	3	1.9404e-16	171.81	0.98222	1.1095	1.2126	1.0624	0.82929	0.82018
ICEADRVAIK	0	1173.62	IPI00022744;IPI00219994;IPI00910737;IPI00219762	IPI00022744	2	0.0018234	93.556	0.97847	0.88948	0.87944	0.98213	0.82998	0.85577
ETICRVTGGMK	0	1250.61	IPI00026271	IPI00026271	2	4.0545e-13	186.87	0.97527	0.83119	0.89026	0.87751	0.83001	0.94617
RVTIMPK	0	843.5	IPI00171611;IPI00465070;IPI00219038;IPI00909530;IPI00455457;IPI00216402;IPI00974574;IPI00419884;IPI00784001	IPI00171611	2	0.016335	73.26	0.94368	0.84203	0.98304	0.94114	0.83001	0.99474
IEDIIVK	0	828.496	IPI00030363	IPI00030363	2	4.8802e-08	127.12	0.9397	0.82747	0.88373	0.88567	0.83016	0.97965
TSPSGKPATIK	0	1085.61	IPI00215911;IPI00792538	IPI00215911	2	0.046499	45.653	1.0503	0.7964	0.78447	0.51542	0.83019	1.4069
DIPVTAQPSK	0	1054.57	IPI00742743;IPI00657704;IPI00029778;IPI00657708	IPI00742743	2	0.0010333	100.88	0.95261	0.88821	0.86064	0.87575	0.8302	0.92812
IHEQCRPWRK	0	1408.71	IPI00441498	IPI00441498	2,3	0.0023159	85.533	0.90973	0.92504	0.86465	0.93161	0.83028	0.99562
VVGAQSIK	0	800.476	IPI00219525	IPI00219525	2	0.021931	62.2	1.015	0.87296	0.82598	1.0363	0.83028	0.94603
AVVVCPK	0	771.431	IPI00479217;IPI00644224;IPI00883857;IPI00644079	IPI00883857	2	0.00021417	118.06	0.87144	0.83018	0.88028	0.93888	0.83035	0.98283
ESPIIFK	0	832.469	IPI00219365	IPI00219365	2	1.5464e-05	105.39	0.98408	0.88025	0.9	0.84109	0.83068	1.0128
IIMGIGHRVK	0	1122.67	IPI00394838;IPI00021290;IPI00939422;IPI00935456	IPI00394838	2	1.2314e-06	154.49	0.97725	0.86614	0.95913	0.92771	0.83068	0.95971
VVFEQTK	0	849.46	IPI00465028;IPI00797270;IPI00796633;IPI00451401	IPI00465028	2	0.0018216	103.92	0.91854	0.78968	0.87214	0.80051	0.83126	1.0093
DISIEEIQK	0	1073.56	IPI00479997;IPI00921996;IPI00744618;IPI00643115;IPI00642012;IPI00218667;IPI00795953;IPI00922311	IPI00479997	2	0.00073486	123.75	0.94123	0.81408	0.89855	0.91505	0.83155	0.8716
SIIIPYIDNIVK	0	1386.81	IPI00939304;IPI00793443;IPI00937471	IPI00939304	2	0.00021776	104.59	1.0713	0.75002	0.70716	0.72334	0.83208	1.1142
ESWHGKPIPK	0	1177.62	IPI00643920;IPI00942979;IPI00792641;IPI00940673;IPI00946864	IPI00643920	2	6.7138e-05	144.77	0.94091	0.74338	0.79908	0.75726	0.83217	1.0757
MIIEIMHK	0	1013.54	IPI00008557	IPI00008557	2	0.00035389	117.04	1.0395	0.91047	1.0014	0.95718	0.83232	0.90741
SIIFVPTSAPRGIFDEYGSK	0	2183.13	IPI00027230;IPI00939289	IPI00027230	2,3	6.5401e-23	188.26	1.0768	0.79336	0.80492	0.72528	0.83237	1.1525
MCIFAGFQRK	0	1256.62	IPI00479217;IPI00644224;IPI00883857;IPI00644079	IPI00883857	2	1.4665e-30	150.4	0.99212	0.80926	0.80567	0.94303	0.83238	0.93402
ETAEAYIGK	0	980.481	IPI00003362	IPI00003362	2	1.1366e-05	143.7	1.1266	0.92705	0.88928	0.89052	0.83254	0.97419
QVDAESWK	0	961.451	IPI00329633;IPI00908949;IPI00967989;IPI00966149;IPI00966670;IPI00966983	IPI00329633	2	0.022565	65.305	0.94875	0.87973	0.95768	0.84338	0.8326	0.87143
IIADVAPSAIRENDIK	0	1723.95	IPI00026215	IPI00026215	2	1.205e-46	150.37	1.0024	1.6801	1.6544	0.98003	0.83265	0.78458
IGTISAIDIIIK	0	1255.78	IPI00100160;IPI00604431	IPI00100160	2	1.1921e-08	149.41	0.86036	0.8122	1.0216	0.91008	0.83266	0.89144
IGHASDRIIAIDGDTK	0	1680.88	IPI00643920;IPI00942979;IPI00792641;IPI00940673;IPI00793119;IPI00789310	IPI00643920	2,3	6.1334e-36	222.45	1.0578	0.74574	0.72627	0.70322	0.83291	1.2451
KVEAQIQEIQVK	1	1411.8	IPI00019502	IPI00019502	2	5.1565e-13	174.39	0.9838	0.90487	0.95553	1.0392	0.83324	0.84448
ITERFFK	0	939.518	IPI00465233;IPI00745266;IPI00910633;IPI00910422;IPI00877935;IPI00878425	IPI00465233	2	0.12934	31.289	1.0498	0.77246	0.76893	0.85138	0.83351	1.0824
YIEATGQIPVK	0	1217.67	IPI00945964;IPI00154473;IPI00790795	IPI00945964	2	4.885e-05	123.67	0.81622	1.086	1.5193	1.0843	0.83381	0.57445
NSNPAINDNIEK	0	1327.64	IPI00010896	IPI00010896	2	0.00076328	98.337	0.92044	0.73566	0.80462	1.1182	0.8339	0.75914
INVTEQEK	0	959.492	IPI00465248	IPI00465248	2	2.8229e-06	143.03	0.9126	0.95236	0.96092	1.0554	0.83423	0.88107
AIFAGYK	0	768.417	IPI00029731;IPI00793102;IPI00926288;IPI00926495	IPI00029731	1,2	0.00021417	118.06	0.91952	0.87993	0.88082	0.901	0.83435	0.96382
NSSNKPAVTTK	0	1145.6	IPI00908873;IPI00216654;IPI00292387	IPI00908873	2	0.036882	49.448	1.2581	0.84525	0.5878	0.69926	0.83479	1.0638
GKPVRIMWSQRDPSIRK	0	2053.14	IPI00008524;IPI00410017;IPI00796945;IPI00909378;IPI00301154;IPI00796139	IPI00008524	3	0.028009	53.828	0.96868	1.0044	1.0214	0.84435	0.83522	0.99809
FAADAVK	0	720.381	IPI00744692	IPI00744692	1	0.0099136	80.18	0.80174	0.56487	0.73296	0.90669	0.83553	1.0429
GPPCGPVNCNEK	0	1327.56	IPI00748256;IPI00479722	IPI00748256	2	0.00042328	101.71	0.91715	0.82953	0.88294	0.94857	0.83598	0.90469
MIFVGIK	0	806.472	IPI00465315;IPI00917605	IPI00465315	1,2	4.088e-18	118.06	1.2322	1.1248	0.93444	0.91482	0.83603	0.90079
AAIIPTSIFITNK	0	1387.81	IPI00441473;IPI00064328;IPI00794580	IPI00441473	2	2.9856e-05	117.93	0.90886	0.96449	1.0024	0.92723	0.83608	0.89327
RFIVTVIK	0	974.628	IPI00298961;IPI00893013	IPI00298961	2	0.0043499	87.308	0.96923	0.89073	0.91618	0.8418	0.83635	1.0191
EDVFVHQTAIK	0	1285.67	IPI00643351;IPI00031812;IPI00450235;IPI00031801;IPI00219148;IPI00219147;IPI00555698;IPI00250153;IPI00784202	IPI00643351	2	9.6501e-13	179.19	1.0995	0.86653	0.76554	0.762	0.83668	1.2231
ADFCIIHYAGK	0	1293.62	IPI00019502;IPI00395772;IPI00790503;IPI00479307;IPI00397526	IPI00019502	2	2.5375e-08	162.36	1.0069	0.91963	0.96951	0.88548	0.83671	0.94171
IGEHMEEHGIK	0	1278.6	IPI00884896;IPI00885213;IPI00783641;IPI00847482;IPI00871867;IPI00973082;IPI00554786;IPI00967892	IPI00884896	2,3	0.0015064	90.913	0.97151	0.90124	0.91291	0.9521	0.83678	0.96724
ARGIPDNISSVINK	0	1482.82	IPI00873223;IPI00329331;IPI00939504;IPI00395676;IPI00946647;IPI00946873;IPI00945447;IPI00945562;IPI00945711;IPI00946068;IPI00944947;IPI00946012	IPI00873223	2	8.2141e-16	180.11	1.0236	0.9696	0.96388	0.95708	0.83698	0.87967
VIESRAQKDEEK	1	1430.74	IPI00940084;IPI00216135;IPI00296039;IPI00970818;IPI00940343;IPI00000230;IPI00014581;IPI00604537;IPI00915324;IPI00941861;IPI00216134;IPI00384369;IPI00018853;IPI00921977;IPI00745267	IPI00940084	3	0.074226	86.014	0.87467	0.73147	0.86891	0.989	0.83725	0.95532
RSPPIPIAK	0	977.602	IPI00009904;IPI00852792	IPI00009904	2	0.00072227	104.2	0.93976	0.85556	0.87498	0.8886	0.83745	0.98245
QIATIHAQVADMK	0	1424.74	IPI00019502	IPI00019502	2	1.4793e-21	194.48	0.95366	0.80747	0.86772	0.86707	0.83775	1.0406
ENEVEEVKEEGPK	1	1514.71	IPI00470498;IPI00412714;IPI00410693;IPI00470497	IPI00470498	2,3	2.3357e-41	246.86	1.1299	0.78338	0.75393	0.80074	0.83777	1.0933
GINSESMTEETIK	0	1437.67	IPI00889534;IPI00011062;IPI00397498	IPI00889534	2	5.4432e-292	236.28	0.87121	3.7237	4.2641	0.97221	0.83778	0.87464
FAANINK	0	776.418	IPI00216951;IPI00917492;IPI00917920;IPI00917399;IPI00917615	IPI00216951	2	0.010587	79.454	0.98665	0.81096	0.94871	0.80344	0.83785	1.1049
TSRMVWTIMAEVWS	0	1695.81	IPI00929418	IPI00929418	2	0.034403	59.227	0.98807	0.77008	0.76136	0.69331	0.83786	1.2296
DIAAHIK	0	766.434	IPI00019329	IPI00019329	2	0.015263	74.415	0.93491	0.81318	0.8732	0.8085	0.838	0.95648
IRCVFEMPNENDK	0	1650.75	IPI00374657;IPI00170692;IPI00640416	IPI00374657	2	2.4818e-05	132.31	0.91309	0.95646	1.0037	0.99537	0.83813	0.87484
AMINIHIQK	0	1066.6	IPI00020510	IPI00020510	2	2.3611e-09	177.32	0.94942	0.87353	0.8511	0.87811	0.83816	0.96128
RFASGGCDNIIK	0	1336.66	IPI00853598;IPI00375370;IPI00479141;IPI00789755;IPI00789169;IPI00845335;IPI00795464;IPI00556487	IPI00853598	2	0.00019495	105.65	0.98733	0.97209	0.9587	0.8644	0.83827	1.0042
AMEAIATAEQACK	0	1392.64	IPI00856098;IPI00215743;IPI00220967;IPI00744135	IPI00856098	2	0.0051678	73.877	0.88274	0.77565	0.86057	0.95306	0.83834	0.92089
EIIERIPEINK	0	1352.77	IPI00022462;IPI00924935;IPI00790745	IPI00022462	2	1.4237e-13	183.33	0.93778	0.91862	0.94298	0.9836	0.83894	0.89801
AQGAIAMASIAK	0	1130.61	IPI00157790;IPI00639848	IPI00157790	2	0.0058236	73.435	1.0668	0.7602	0.85604	1.0766	0.83921	0.76206
SFVINIGK	0	876.507	IPI00219219	IPI00219219	1,2	0.0017299	106.42	1.2196	0.78349	0.72015	0.64701	0.83929	0.89898
DGFVTVDEIK	0	1121.56	IPI00789155;IPI00941900	IPI00789155	2	0.0017547	91.549	0.96753	1.3523	1.5498	0.88209	0.83929	0.95879
NENARQQIERQNK	0	1626.82	IPI00019502;IPI00395772;IPI00742780	IPI00019502	3	0.02251	56.205	0.90062	0.81266	0.8866	0.79409	0.8393	1.1921
IQIEQVQEWK	0	1299.68	IPI00872359;IPI00029485;IPI00873712;IPI00917681;IPI00935906;IPI00916757;IPI00219114;IPI00914026;IPI00917166;IPI00555695	IPI00872359	2	0.0042513	78.342	1.024	0.86355	1.0162	1.0427	0.83935	0.95902
GCGTVIISGPRK	0	1243.67	IPI00215719	IPI00215719	2,3	3.0468e-27	216.03	0.97965	0.84884	0.87804	0.80222	0.83955	1.0487
SIRPIIEGRDIIAAAK	0	1722.02	IPI00301323	IPI00301323	2,3	2.9346e-06	127.32	1.0838	0.7363	0.67149	0.69022	0.83958	1.2627
RKGDEVDGVDEVAK	1	1515.75	IPI00449049;IPI00973237	IPI00449049	2	3.7267e-30	216	1.0245	0.84749	0.94513	0.98961	0.83961	0.83371
VAQGVSGAVQDK	0	1157.6	IPI00291510;IPI00925196;IPI00795143	IPI00291510	2	3.3893e-21	142.38	0.99745	0.98234	0.94155	0.98208	0.83972	0.90837
YIIIGDTGVGK	0	1134.63	IPI00031169;IPI00102896;IPI00798089;IPI00879279	IPI00031169	2	0.015581	59.542	0.93018	0.84619	0.90688	0.97377	0.83975	0.91927
FVIATSTK	0	865.491	IPI00790342;IPI00329389;IPI00867533	IPI00790342	2	0.0011611	102.51	0.94917	0.84022	0.92042	0.91402	0.8398	0.92942
ITIDTNK	0	803.439	IPI00477766;IPI00479833;IPI00873415;IPI00872159;IPI00651741;IPI00872355;IPI00658164;IPI00918015	IPI00477766	2	0.023005	66.073	0.93275	0.8812	0.90592	0.91078	0.83983	0.96902
ITITNDK	0	803.439	IPI00003865;IPI00880019;IPI00902596;IPI00339269;IPI00304925;IPI00845339;IPI00909073;IPI00643152;IPI00893099;IPI00939442;IPI00940023;IPI00830052;IPI00911039;IPI00007702	IPI00003865	2	0.014523	75.213	0.93275	0.8812	0.90592	0.91078	0.83983	0.96902
ESYSVYVYK	0	1136.54	IPI00646240;IPI00794461;IPI00930174;IPI00020101;IPI00152906;IPI00303133;IPI00329665;IPI00419833;IPI00554798;IPI00815755;IPI00018534;IPI00477495;IPI00930570	IPI00646240	2	3.9678e-09	163.32	0.95181	0.77307	0.84511	0.8918	0.83989	0.95403
IARQIISK	0	927.587	IPI00220402;IPI00927947;IPI00410126;IPI00044607;IPI00789065	IPI00220402	2	2.6788e-06	150.05	0.97849	0.84183	0.86977	0.91028	0.83997	0.93367
TIDDIEDK	0	947.445	IPI00967467;IPI00218319;IPI00909961;IPI00479185;IPI00642042;IPI00854592;IPI00643370;IPI00640264	IPI00967467	2	3.6155e-08	148.52	1.1931	0.86488	0.69021	0.65524	0.84023	1.0912
SAIIGIPQPIIEINDSPVFK	0	2150.2	IPI00640703;IPI00747670;IPI00549861;IPI00872800	IPI00640703	2,3	1.5748e-15	158.44	1.0291	0.79786	0.80583	0.94277	0.84027	0.83916
GGPTPQEAIQRIRDTEEMISK	0	2355.19	IPI00025974	IPI00025974	3	1.7795e-06	109.42	0.80363	0.9255	1.1755	0.99006	0.84035	0.85878
IGVTANDVK	0	915.503	IPI00916111;IPI00915869;IPI00916861;IPI00952583	IPI00916111	2	0.0066998	79.148	0.89962	0.89294	0.90706	0.88677	0.84041	0.97865
IAPEFAK	0	774.428	IPI00220301;IPI00910553	IPI00220301	2	0.0076011	82.671	0.90327	0.68661	0.78367	0.93457	0.84056	0.91265
ESEAVEWQQK	0	1232.57	IPI00219365;IPI00922115	IPI00219365	2	5.235e-06	149.96	0.93024	0.77374	0.91887	0.96778	0.84065	0.9022
IQDAINIIK	0	1026.61	IPI00783271	IPI00783271	2	0.0012098	112.36	0.95719	0.8233	0.85439	0.93585	0.84107	0.84599
EICEIKPK	0	1015.54	IPI00015897;IPI00885057	IPI00015897	2	0.0012155	111.95	1.1075	0.96476	0.8208	0.83187	0.84127	1.0423
GADIMYTGTVDCWRK	0	1771.8	IPI00291467;IPI00022891	IPI00291467	2	7.9297e-11	162.37	0.94462	0.83775	0.91032	1.0501	0.84133	0.73383
SIEDQVEMIRTVK	0	1546.8	IPI00026154;IPI00943074;IPI00792916;IPI00829824	IPI00026154	2	5.57e-15	179.93	0.94552	0.90274	0.87117	0.77067	0.84157	1.0769
RRAVGIWHCGSCMK	0	1716.81	IPI00414860;IPI00926175;IPI00926815	IPI00414860	3	0.084796	41.092	0.87993	0.93266	0.98803	0.89011	0.84171	0.93308
DATNVGDEGGFAPNIIENK	0	1959.92	IPI00465248;IPI00759806	IPI00465248	2,3	1.0814e-147	276.26	0.98272	0.95157	0.9631	1.009	0.84189	0.8557
GGGHVAQIYAIRQSISK	0	1783.97	IPI00221092	IPI00221092	2,3	1.5625e-74	273.99	1.0598	0.79064	0.7624	0.78566	0.84193	1.1204
QAFERIEVKK	1	1246.7	IPI00329633;IPI00908949;IPI00910719	IPI00329633	2	0.00042438	129.89	0.93877	0.85266	0.8826	0.77748	0.84219	1.0002
GSGNIEAIHIIK	0	1250.7	IPI00297779;IPI00791487	IPI00297779	2	1.2523e-08	148.62	0.96629	0.86766	0.8939	0.88639	0.84221	0.97418
EFMWAIK	0	923.458	IPI00179589;IPI00924816;IPI00926178	IPI00179589	2	0.00038471	114.19	1.0025	0.82748	0.8012	0.93007	0.84225	0.92077
IVICPDEGFYK	0	1339.65	IPI00022597	IPI00022597	2	0.001709	89.548	0.89759	0.82787	0.91302	1.0073	0.84226	0.85724
AIDIFTDAIK	0	1105.6	IPI00032826;IPI00892521;IPI00168839	IPI00032826	2	1.2556e-21	138.25	0.98301	0.85066	0.91421	0.94921	0.84237	0.92828
KAEEIANEMIEAAK	1	1545.77	IPI00910701;IPI00027442	IPI00910701	2	8.5607e-66	190.87	0.98352	0.91551	0.96542	0.91647	0.84276	0.92588
ACQSIYPIHDVFVRK	0	1831.94	IPI00419880;IPI00472119;IPI00967641;IPI00967073;IPI00964983;IPI00968146;IPI00966516	IPI00419880	2,3	1.1124e-42	231.13	0.9185	0.81038	0.86454	0.94788	0.84302	0.90084
ASSTSPVEISEWIDQK	0	1775.86	IPI00010810;IPI00895865;IPI00792673	IPI00010810	2	6.0715e-27	207.79	0.9069	0.82802	1.0422	0.9701	0.84328	0.90563
TKPSDEEMIFIYGHYK	0	1956.93	IPI00922055;IPI00921830;IPI00965476;IPI00218836;IPI00966070;IPI00815745;IPI00010182	IPI00922055	3	0.00073411	98.676	1.0108	0.93243	0.93107	0.87622	0.84347	0.99134
TAVAHRPGAFK	0	1153.64	IPI00056357	IPI00056357	2,3	0.0032442	79.201	1.2003	0.86288	0.69825	0.68182	0.84356	1.1667
VAVVAGYGDVGK	0	1133.61	IPI00012007;IPI00935818	IPI00012007	2	7.7938e-06	130.56	0.97786	0.91833	0.93551	0.93032	0.84381	0.99189
SGMNVARINFSHGTHEYHAETIK	0	2598.24	IPI00479186;IPI00941899;IPI00220644;IPI00909560;IPI00888126	IPI00479186	3,4	4.5664e-36	208.98	1.1071	0.84935	0.77185	1.0784	0.84382	0.80266
AQIREINITAAK	0	1326.76	IPI00013415;IPI00893703;IPI00478287	IPI00013415	2,3	1.0386e-27	209.19	0.94169	0.90817	0.91326	0.97591	0.84404	0.94803
QAEIWIHK	0	1023.55	IPI00216260;IPI00021016;IPI00916152;IPI00916739;IPI00956590	IPI00216260	2	0.0057977	88.948	0.90482	0.8877	0.95693	0.86745	0.8445	0.94318
EARIVIDSVK	0	1128.65	IPI00973811;IPI00217236;IPI00973785	IPI00973811	2	0.0032497	83.081	1.026	0.95859	0.99513	1.1483	0.84511	0.85779
MDETDASSAVK	0	1152.5	IPI00025815;IPI00971018;IPI00639819	IPI00025815	2	0.0060554	92.247	0.96824	0.76608	0.75758	0.93526	0.84516	1.0222
IVHANFGTK	0	985.535	IPI00022462;IPI00924935	IPI00022462	2	0.0021701	96.143	1.0393	0.76723	0.73193	0.8928	0.8454	1.1035
AIIQSSASRK	0	1059.6	IPI00299000;IPI00794875;IPI00807557	IPI00299000	2	2.5892e-18	197.27	0.8651	0.86041	0.9889	0.89369	0.84564	0.99396
GIRICRPK	0	998.581	IPI00419919;IPI00796934;IPI00019208	IPI00419919	2	0.0011258	102.72	0.96858	0.79865	0.82074	0.80061	0.84605	1.1491
IVEIPFNSTNK	0	1260.67	IPI00006482;IPI00646182;IPI00414005;IPI00744194	IPI00006482	2	0.0035616	77.062	0.79466	0.87056	1.0257	1.1485	0.84605	0.73426
GTDDSMTIQSQK	0	1309.58	IPI00011698;IPI00927280;IPI00940972	IPI00011698	2	5.6528e-28	217.09	0.96588	0.9136	0.86284	0.95906	0.84624	1.0365
EADIAAQEEAAKK	1	1372.68	IPI00007001;IPI00377233	IPI00007001	2	0.0001143	126.83	0.90029	0.79583	0.86457	0.7937	0.84656	1.0587
IEHEYIQNFK	0	1319.65	IPI00017596;IPI00910350	IPI00017596	2	0.0010682	105.98	1.031	0.80602	0.78047	0.82547	0.84681	1.0248
TAVAPIERVK	0	1082.64	IPI00007188;IPI00010420;IPI00291467;IPI00645646;IPI00022891	IPI00007188	2	1.2279e-23	226.09	0.97973	0.78033	0.81301	0.67816	0.8469	1.2087
EAIIQASRDQK	0	1257.67	IPI00219365	IPI00219365	2	0.0024083	82.417	0.8902	0.85805	0.9089	0.88597	0.84708	0.96529
IATTIIQHWK	0	1209.69	IPI00296337;IPI00376215;IPI00786995	IPI00296337	2	0.00024579	130.98	0.84504	0.97523	1.0814	1.089	0.84712	0.81373
YTAQVDAEEK	0	1152.53	IPI00220487	IPI00220487	2	9.3238e-06	138.24	1.0109	0.83665	0.85676	0.91921	0.84719	1.0029
EETQPPVAIK	0	1110.59	IPI00470498;IPI00412714;IPI00410693;IPI00470497	IPI00470498	2	0.0023326	85.355	0.93463	0.83818	0.86698	0.93973	0.8472	0.92723
EFEPIINWMK	0	1305.64	IPI00027230;IPI00939289;IPI00556482	IPI00027230	2	2.1634e-18	198.72	0.99135	0.88897	0.89878	0.98478	0.84727	1.0117
GIIDPTK	0	742.423	IPI00784154;IPI00917575;IPI00076042	IPI00784154	2	0.0015145	101.28	0.88617	0.84661	0.89669	0.93571	0.84759	0.96336
RVCEEIAIIPSK	0	1413.77	IPI00221093;IPI00791157;IPI00878027	IPI00221093	2	8.1658e-07	143.25	0.86738	0.86397	0.93057	0.90328	0.84782	0.92891
GYTSWAIGISVADIAESIMK	0	2111.06	IPI00947127;IPI00217966;IPI00908791;IPI00910754	IPI00947127	2	9.4808e-10	137.73	0.84748	0.81147	0.84608	1.44	0.84797	0.83321
EIRENTQTTIK	0	1331.7	IPI00807545;IPI00910458;IPI00514561;IPI00216746;IPI00216049;IPI00640296	IPI00216746	2	2.225e-05	138.76	0.96509	0.83487	0.88353	1.0129	0.848	0.88132
AEPVEVVAPRGK	0	1250.7	IPI00449049	IPI00449049	2	0.00028183	115.14	0.93826	0.83349	0.84093	0.9003	0.84803	0.90838
ECVIPGGETAGDMGK	0	1519.66	IPI00017303;IPI00893933;IPI00940797;IPI00940255;IPI00942418;IPI00783458;IPI00941267	IPI00017303	2	0.019089	56.527	0.99931	0.81832	0.80535	0.7909	0.84805	1.0292
EAVAPVQEESDIEK	0	1542.74	IPI00915993;IPI00216348;IPI00827813;IPI00917978;IPI00744015;IPI00827859;IPI00302712;IPI00412601;IPI00917325;IPI00915884;IPI00917785;IPI00917075;IPI00917180;IPI00917685;IPI00916160;IPI00917564;IPI00916306;IPI00916278	IPI00915993	2	7.7108e-200	226.93	0.93771	0.79012	0.83357	0.99798	0.84816	0.85384
ASDEVTRIAK	0	1088.58	IPI00307162;IPI00291175;IPI00910496;IPI00909711	IPI00307162	2	1.2327e-08	161.67	0.90469	0.72578	0.79531	0.77671	0.84817	1.0067
AFDRHCNMVIENVK	0	1731.82	IPI00017963;IPI00930678	IPI00017963	2,3	1.7221e-40	229.97	0.94128	0.82529	0.7794	0.94456	0.84819	0.78933
IPRTTTESEVMK	0	1390.71	IPI00218342;IPI00794900	IPI00218342	2	0.00019495	105.65	0.9135	0.85754	0.93349	1.0043	0.84824	0.86939
EVGVYEAIK	0	1006.53	IPI00916111;IPI00915869;IPI00916861	IPI00916111	2	0.011459	70.028	0.91106	0.89369	0.95448	0.97134	0.84842	0.95567
ANIRNMSVIAHVDHGK	0	1760.91	IPI00186290;IPI00909570	IPI00186290	2,3	5.1586e-27	208.39	0.89832	0.80743	0.87556	0.83279	0.84843	0.96337
ATVTPSPVK	0	898.512	IPI00022145;IPI00844197	IPI00022145	2	1.1366e-05	133.13	0.90403	0.80606	0.87982	0.8659	0.84872	0.9927
KEGDIIAAQARIK	1	1411.81	IPI00216952;IPI00021405;IPI00216953;IPI00644087;IPI00514320;IPI00514817;IPI00655812;IPI00965833;IPI00514204;IPI00910241;IPI00965567	IPI00216952	2,3	0.00026511	116.03	0.97093	0.83637	0.94453	0.85489	0.84879	0.92614
VVQERIVQAEYWHDPIK	0	2109.1	IPI00514424;IPI00002412;IPI00973872;IPI00514248;IPI00908718	IPI00514424	3	0.011929	61.641	0.80001	0.91398	1.1668	1.5495	0.84888	0.79575
IIRVYDIGK	0	1075.64	IPI00300371;IPI00828110	IPI00300371	2	0.016561	90.15	1.3134	0.76368	0.58585	0.83492	0.8489	1.0191
VCADIIRGAK	0	1101.6	IPI00794659;IPI00012493;IPI00791265	IPI00794659	2	1.2657e-06	153.97	0.94023	0.89256	0.93425	0.95126	0.84932	0.94685
VSSFVHWIK	0	1101.6	IPI00470520;IPI00744785;IPI00973728;IPI00424530;IPI00424529	IPI00470520	2	0.0025528	88.819	0.94023	0.89256	0.93425	0.95126	0.84932	0.94685
DIAEDAPWKK	1	1171.59	IPI00333541;IPI00302592;IPI00644576;IPI00553169;IPI00927825;IPI00900293;IPI00289334;IPI00477536;IPI00943563;IPI00382697;IPI00953109;IPI00382698;IPI00382699;IPI00178352;IPI00413958	IPI00333541	2	0.010503	73.067	1.0422	0.81849	0.81069	0.8667	0.84946	1.0627
AVWIPAVK	0	882.533	IPI00784366;IPI00784156;IPI00790702;IPI00909735	IPI00784366	2	0.0033567	94.407	1.0366	0.91677	0.85657	0.92081	0.84968	0.94282
SIISAEEAAK	0	1017.53	IPI00140420;IPI00910438	IPI00140420	2	2.4202e-05	127.83	1.0975	0.71664	0.66934	0.72021	0.84977	1.1466
FFVGGNWK	0	953.476	IPI00465028;IPI00797270;IPI00796633;IPI00451401	IPI00465028	2	0.00034839	117.16	1.0599	0.9836	0.93151	0.93309	0.84977	0.93651
ANDDIIVNWVNRTISEAGK	0	2114.08	IPI00216694;IPI00947227	IPI00216694	2,3	5.0504e-98	298.16	0.99113	0.8056	0.85679	0.91418	0.84984	0.97282
VKEDPDGEHARRAMQK	1	1865.92	IPI00171903;IPI00383296	IPI00171903	3	0.01209	83.204	0.93813	0.87758	0.9699	0.97937	0.84986	0.86062
AFCGFEDPRTK	0	1326.6	IPI00014898;IPI00186711;IPI00398002;IPI00398778;IPI00398777;IPI00398779;IPI00398775;IPI00420096;IPI00398776	IPI00014898	2	0.0047521	74.944	0.88463	0.83915	0.96607	0.92457	0.84992	0.9546
KINVTEQEK	1	1087.59	IPI00465248	IPI00465248	2	0.0015699	101.97	0.89301	0.85523	0.92903	0.82999	0.85004	0.99534
SSIIIDVKPWDDETDMAK	0	2061.99	IPI00178440	IPI00178440	2,3	2.2079e-110	313.51	1.0709	0.77719	0.73539	0.70703	0.85009	1.137
KFAEAFEAIPRAIAENSGVK	1	2147.14	IPI00784090;IPI00302925	IPI00784090	3	0.0033146	72.433	0.98774	0.71202	0.89746	1.143	0.8501	0.93774
SNVSDAVAQSTRIIYGGSVTGATCK	0	2541.25	IPI00465028;IPI00797270;IPI00796633	IPI00465028	2,3	1.0525e-40	201.15	1.0658	0.73868	0.72128	1.4248	0.85013	0.67563
IATIISSFIK	0	1091.66	IPI00030116;IPI00968239;IPI00941001;IPI00643166;IPI00966941	IPI00030116	2	0.0038649	80.763	0.92625	0.94831	0.99631	1.0738	0.85035	0.89496
VVGRCIPTPK	0	1125.63	IPI00026202;IPI00872093;IPI00847774;IPI00909746	IPI00026202	2	1.6486e-05	150.1	0.94689	0.89995	0.94496	1.0396	0.85048	0.90706
WMEEQAQSIIDK	0	1476.69	IPI00641788;IPI00013396	IPI00641788	2	3.7664e-09	160.18	0.92064	0.75053	0.85581	0.91033	0.85049	0.97064
IIDSSTVTHIFK	0	1359.74	IPI00029623;IPI00867679	IPI00029623	2	0.00015122	110.08	1.0664	1.0228	0.98046	0.95502	0.85054	0.86505
QVATAIQNIQTK	0	1313.73	IPI00307162;IPI00291175	IPI00307162	2	1.2e-130	204.85	0.91035	0.88579	0.92358	0.7986	0.85058	1.0416
SANVNEFPVIK	0	1216.65	IPI00022744;IPI00219994;IPI00910737	IPI00022744	2	0.0019803	87.719	1.0318	0.80282	0.7077	0.73031	0.85071	1.1057
IIEIDSFIK	0	1076.61	IPI00219445;IPI00030243;IPI00922362	IPI00219445	2	0.0019526	99.815	1.0364	0.84121	0.79108	0.93686	0.85072	0.89496
SGVPVIAVSIAIEGK	0	1438.84	IPI00290110;IPI00240675;IPI00940614;IPI00647084	IPI00290110	2	6.6858e-50	131.24	1.0873	0.81658	0.69809	0.66025	0.85079	1.1881
IKPIPGETMEK	0	1241.67	IPI00298994	IPI00298994	2	0.011997	64.64	0.98905	0.90072	0.84587	0.99644	0.85089	0.91308
GNAAWQEQIK	0	1143.57	IPI00013452;IPI00909383	IPI00013452	2	0.0001198	121.08	0.94773	0.81162	0.95488	0.91459	0.85095	1.0235
RVIPPNWK	0	1008.59	IPI00221089	IPI00221089	2	0.0034577	89.142	0.93387	0.81905	0.89896	0.90188	0.85114	0.94517
IRTSPTFRRPK	0	1357.79	IPI00789159;IPI00793523;IPI00794894;IPI00021266;IPI00176755	IPI00789159	2,3	0.00060037	102.4	0.89514	0.85799	0.93606	0.87914	0.85125	0.98475
KIQIQCVVEDDK	1	1473.75	IPI00178440;IPI00164838	IPI00178440	2	0.00013375	116.51	0.92676	0.8181	0.92279	0.87506	0.85247	0.951
GKFEDMAK	1	924.438	IPI00419258;IPI00645948;IPI00644653;IPI00018755;IPI00742929;IPI00788220;IPI00737736;IPI00022796;IPI00879051;IPI00643746;IPI00418184	IPI00419258	2	0.015057	99.815	1.0308	0.77916	0.80072	0.7696	0.85249	1.1541
FFDANYDGK	0	1075.46	IPI00017596;IPI00910350;IPI00017597;IPI00553216;IPI00892961	IPI00017596	2	0.020956	60.518	0.95348	0.82799	0.84215	0.82868	0.85259	1.0044
AYIPQEIIGK	0	1130.63	IPI00018120;IPI00910684	IPI00018120	2	0.0039513	79.974	1.0034	0.93096	0.8779	0.94599	0.85323	0.98228
MQPDQQVVINCAIVRGVK	0	2054.08	IPI00301058	IPI00301058	3	0.0014335	78.191	0.85858	0.96391	1.0528	0.82109	0.85337	0.93757
ARIVEYEK	0	1006.54	IPI00220487;IPI00456049;IPI00879809	IPI00220487	2	0.00023665	138.11	0.89214	0.9282	1.0678	0.95227	0.85365	0.85821
IVIDEPAK	0	883.501	IPI00020956;IPI00514127;IPI00514330;IPI00922032	IPI00020956	2	0.0042434	84.568	0.97669	0.92872	0.95143	0.97714	0.85367	0.91661
FRHGVIVAADSRATAGAYIASQTVK	0	2588.38	IPI00479306;IPI00383971	IPI00479306	3,4	9.4426e-05	76.186	1.0532	0.97449	0.94751	0.76952	0.85369	1.1092
IGSTEVASNVPK	0	1200.63	IPI00306043;IPI00397024	IPI00306043	2	6.2765e-06	133.32	0.92194	0.82563	0.94316	0.86218	0.85376	1.0167
KEETQPPVAIK	1	1238.69	IPI00470498;IPI00412714;IPI00410693;IPI00470497	IPI00470498	2	3.2678e-08	164.04	0.91959	0.81893	0.91302	0.91423	0.85377	0.91883
KYVIYIERVQREK	1	1722.98	IPI00027270;IPI00433834;IPI00007144;IPI00789514	IPI00027270	3	0.087986	45.915	0.93891	0.92193	0.90136	0.9303	0.85414	1.0927
KNPQAVIDVIK	1	1223.72	IPI00419979;IPI00553222;IPI00896377;IPI00410084;IPI00027382;IPI00930214;IPI00941059	IPI00419979	2	0.0040481	83.182	1.2088	1.1327	0.99653	0.81721	0.85421	1.0598
TIAPAIVSK	0	898.549	IPI00465248	IPI00465248	1,2	1.555e-05	140.83	1.1509	0.93985	0.82358	0.71707	0.85425	1.2466
GAAPNVVYTYTGK	0	1339.68	IPI00030654;IPI00012998;IPI00647126	IPI00030654	2	7.3539e-06	127.02	0.86355	0.84904	1.0252	0.96257	0.85429	0.93206
GAVWGATINK	0	1015.55	IPI00294536;IPI00941907;IPI00796172	IPI00294536	2	5.0597e-18	188.87	0.90716	0.802	0.98138	0.91114	0.85437	0.9972
FAEAIGSTEAK	0	1122.56	IPI00054042;IPI00217449;IPI00217450;IPI00943949;IPI00293242;IPI00927953	IPI00054042	2	0.0013509	91.961	0.99508	0.78421	0.78498	0.85053	0.8544	0.94738
GINSSNVENQIQATQAARK	0	2028.03	IPI00002214;IPI00789457	IPI00002214	3	1.1173e-06	121.27	0.93643	0.87237	0.9418	0.84008	0.85472	0.96641
FMNPFNMPNIYQK	0	1642.76	IPI00013894;IPI00479946;IPI00908463	IPI00013894	2	4.9657e-15	174.42	1.1061	1.0839	0.95741	0.92094	0.85485	1.0116
IIIDSIYK	0	963.564	IPI00175416;IPI00783616;IPI00889624;IPI00848061;IPI00947101	IPI00175416	2	0.0027215	93.429	0.95657	0.90165	0.87478	0.94976	0.85494	1.0071
ATVNIIGEEK	0	1072.58	IPI00024670;IPI00922887;IPI00922290	IPI00024670	2	0.0015299	93.959	0.93663	0.71991	0.78577	0.81154	0.85537	0.96243
AASQPTSIAPEK	0	1198.62	IPI00657706;IPI00885058;IPI00019068	IPI00657706	2	2.1604e-09	164.64	0.9286	0.80448	0.84745	0.90074	0.85557	0.94034
SNEIITAIIQGMRK	0	1572.87	IPI00001639;IPI00922792	IPI00001639	2	5.75e-16	183.81	1.145	0.75393	0.6152	0.67128	0.85567	1.2902
DQIAQIEASIAAAK	0	1427.76	IPI00217975;IPI00790831	IPI00217975	2	5.2378e-55	258.41	0.96254	0.80724	0.91475	0.94306	0.85572	0.95938
EPVETAVDNNSK	0	1301.61	IPI00387130;IPI00025333;IPI00908414;IPI00878389	IPI00387130	2	0.00046671	104.17	1.0079	0.86889	1.0097	0.97029	0.85576	0.8607
AIIQATIREEK	0	1270.72	IPI00793201;IPI00006252;IPI00910647;IPI00965185	IPI00793201	2	4.885e-05	125.72	0.94	0.99731	1.0731	0.88894	0.85625	0.933
SFIEDIRK	0	1006.54	IPI00219525;IPI00943153;IPI00910950	IPI00219525	2	0.00077334	109.11	1.0504	0.6145	0.56384	0.98326	0.85656	0.88127
EDINIRIK	0	999.571	IPI00008552	IPI00008552	2	0.0023463	99.802	0.93693	0.83652	0.83988	0.87982	0.85664	0.9936
DIEAIINSK	0	1001.54	IPI00216952;IPI00021405;IPI00216953;IPI00644087;IPI00514320;IPI00514817;IPI00655812;IPI00965833;IPI00514204;IPI00910241;IPI00965567	IPI00216952	2	1.705e-08	169.93	0.91534	0.99662	1.0879	1.0827	0.85676	0.93553
KVVDYTTAK	1	1023.56	IPI00005719;IPI00937805;IPI00922662;IPI00917079;IPI00334174	IPI00005719	2	0.0051077	91.549	0.92916	0.73905	0.76002	0.95306	0.85704	0.99188
ATVSAPFGK	0	876.471	IPI00014898;IPI00186711;IPI00398002;IPI00398778;IPI00398777;IPI00398779;IPI00398775;IPI00420096;IPI00398776	IPI00014898	2	4.6147e-16	133.57	1.0997	0.9962	0.93573	0.93325	0.85708	0.98429
YGYEIPVDMICK	0	1486.68	IPI00029623;IPI00867679	IPI00029623	2	9.6574e-06	127.17	0.97107	0.83737	0.87948	0.85399	0.85723	1.0294
SIGQWIQEEK	0	1216.61	IPI00889534;IPI00011062	IPI00889534	2	1.2983e-08	172.92	1.183	0.7439	0.66209	0.7277	0.8573	1.2373
ADVITTGAGNPVGDK	0	1413.71	IPI00465436	IPI00465436	2	6.5732e-15	166.35	1.0032	0.84788	0.86843	0.86556	0.85737	1.0646
SVDEVFDEVVQIFDK	0	1767.86	IPI00219953;IPI00908752;IPI00909419	IPI00219953	2	8.0073e-32	186.83	1.0138	0.82748	0.78243	0.87983	0.85753	1.0182
SEENEEPMETDQNAKEEEK	1	2264.92	IPI00002966	IPI00002966	3	2.4463e-13	154.82	1.1566	0.85876	0.76289	0.67082	0.85756	1.2821
KGVNIPGAAVDIPAVSEK	1	1763.98	IPI00479186;IPI00941899;IPI00220644;IPI00910979;IPI00909560;IPI00847989;IPI00888126;IPI00604528	IPI00479186	2,3	1.6452e-32	210.12	0.94936	0.87978	0.93102	0.88569	0.85767	1.0256
IIEGEEERIK	0	1214.65	IPI00217975	IPI00217975	2	0.00059406	104.43	0.97718	0.84754	0.84664	0.97025	0.8577	0.88431
AARSIPAGAEPGEK	0	1352.7	IPI00909195;IPI00027397;IPI00607884	IPI00909195	2,3	1.7595e-06	127.18	0.92063	0.92373	0.92564	0.90115	0.85783	0.9347
WDTGENPIYK	0	1221.57	IPI00217563	IPI00217563	2	0.018744	57.348	1.0702	0.8735	0.73389	0.95024	0.85809	0.94923
RKYEIGRPAANTK	1	1502.83	IPI00216587;IPI00645201	IPI00216587	3	0.06427	88.187	0.91947	0.92295	1.0288	0.85892	0.85811	0.94888
DIEEDHACIPIKK	1	1566.77	IPI00186290;IPI00909570	IPI00186290	2,3	2.2383e-14	182.71	0.99578	0.88298	0.85707	0.86153	0.85812	1.0534
RAAIQAIK	0	869.545	IPI00025974;IPI00060414	IPI00025974	2	0.0034309	89.298	0.95874	0.87061	0.83274	0.88092	0.85825	0.96078
GYPHICSICDIPVHSNK	0	1995.93	IPI00789551;IPI00017297;IPI00967721;IPI00964862;IPI00966657	IPI00789551	3	6.4177e-06	127.76	1.0088	0.84708	0.83907	0.73469	0.8585	1.1347
QVAQQEAQRAQFIVEK	0	1871.99	IPI00027252	IPI00027252	2	0	262.36	0.92245	0.90905	0.96901	0.93996	0.8587	0.94621
FIIPQIVK	0	956.606	IPI00219217;IPI00788938;IPI00789173	IPI00219217	2	2.3215e-05	150.17	1.007	0.93652	0.93362	0.97023	0.85875	0.93672
AEDGATPSPSNETPK	0	1499.67	IPI00219301	IPI00219301	2	3.0313e-07	142.45	1.0853	0.90249	0.9168	0.8047	0.8588	0.97712
GGKPGITIQAPQIEVSVPSANIEGIEGK	0	2788.5	IPI00021812;IPI00555610	IPI00021812	3	4.0752e-06	89.979	1.0101	1.0305	1.0221	0.83641	0.85886	0.95559
AENQPIRDVIK	0	1281.7	IPI00783271	IPI00783271	2	0.00093454	94.767	0.98414	0.91923	0.95118	0.88594	0.85898	0.87566
QNRPIPQWIRMK	0	1565.86	IPI00646086;IPI00037619;IPI00219162	IPI00646086	2,3	3.0101e-28	221.5	1.0535	0.86989	0.80298	0.69754	0.85908	1.2938
TAIQEEIK	0	930.502	IPI00009342;IPI00328905	IPI00009342	2	0.00052175	128.36	1.0052	0.85603	0.79943	0.81457	0.85917	1.0236
YVPPAAGRYTIK	0	1334.73	IPI00900293;IPI00289334;IPI00477536;IPI00943563;IPI00382697;IPI00953109;IPI00940093;IPI00945610;IPI00382698;IPI00382699	IPI00900293	2,3	0.011539	65.719	0.91597	0.80805	1.0062	0.91692	0.85919	1.0187
ITFDSSFSPNTGKK	1	1527.76	IPI00216308;IPI00790304;IPI00847300	IPI00216308	2,3	4.7082e-10	153.81	0.94193	0.82608	0.90735	0.84877	0.85965	1.0309
SMPWNVDTISK	0	1276.61	IPI00013122	IPI00013122	2	0.0007502	97.214	0.97469	0.84477	0.86412	0.8638	0.85992	0.97129
ITISAIIDGK	0	1029.61	IPI00216308;IPI00847300;IPI00910830;IPI00294779;IPI00031804	IPI00216308	2	2.4202e-05	131.83	0.95038	0.86164	0.95764	0.97901	0.85994	0.96506
NCITNFHGMDITRDK	0	1820.83	IPI00419880;IPI00472119;IPI00967073;IPI00964983;IPI00966860;IPI00968146;IPI00965772;IPI00967388;IPI00963912	IPI00419880	2,3	2.696e-23	198.85	1.0518	0.86506	0.77574	0.74272	0.86028	1.1336
SSQVQRRFFMGNQVIK	0	1924.01	IPI00220834	IPI00220834	3	0.01133	63.185	1.0603	0.66763	0.65853	0.68352	0.86049	1.3134
EIVVIETIEDIDK	0	1514.81	IPI00015842	IPI00015842	2	3.3396e-81	295.83	0.96803	0.93388	1.0997	1.0471	0.86101	0.94556
AIDVMVSTFHK	0	1246.64	IPI00032313	IPI00032313	2	0.00035378	110.08	0.92041	0.90198	0.9397	0.96643	0.86103	0.93173
QRIIGWIQNK	0	1254.72	IPI00333541;IPI00302592;IPI00644576;IPI00553169;IPI00927825;IPI00900293;IPI00289334;IPI00477536;IPI00943563;IPI00382697;IPI00953109;IPI00382698;IPI00382699;IPI00178352;IPI00413958	IPI00333541	2	5.1795e-92	185.81	0.9351	0.87841	0.93232	1.1148	0.86109	0.77203
NEIERNITIK	0	1228.68	IPI00297982;IPI00900305;IPI00900297;IPI00644287	IPI00297982	2	0.0029796	84.687	0.9513	0.85469	0.85515	0.85739	0.86159	0.99673
DMSPISETEMAIGK	0	1507.69	IPI00880007;IPI00396171;IPI00888475;IPI00878314;IPI00220113	IPI00880007	2	5.5422e-55	257.76	0.95227	1.047	1.082	0.92948	0.86161	0.91476
INFVIDNNK	0	1075.57	IPI00844264;IPI00973794;IPI00470891;IPI00873244	IPI00844264	2	0.043671	49.5	1.3752	0.90463	0.66017	1.5306	0.86188	0.59763
RIAAQFIPK	0	1042.63	IPI00855856;IPI00555572;IPI00554742;IPI00555743;IPI00910664	IPI00855856	2	0.0049371	85.67	0.97946	0.81847	0.85221	0.99624	0.86193	0.89408
RIIDAAGANIK	0	1140.66	IPI00550682;IPI00037448;IPI00514020	IPI00550682	2	0.011997	64.64	0.97186	0.81156	0.99086	0.76997	0.8622	1.0295
RVIDYAVK	0	962.555	IPI00004902	IPI00004902	2	0.024989	60.91	0.90625	0.8159	0.91342	0.85865	0.86252	1.025
VFVGRFK	0	851.502	IPI00642904;IPI00012726;IPI00555747;IPI00642944;IPI00885166;IPI00008524;IPI00410017;IPI00796945;IPI00909378;IPI00794246	IPI00008524	2	9.2902e-05	103.29	0.99004	0.8909	0.92512	0.93481	0.86255	0.94581
STIPDADREREAIIAIHK	0	2034.09	IPI00013808;IPI00969112;IPI00845465;IPI00942539	IPI00013808	2,3	2.6464e-37	220.34	1.0332	0.74189	0.70559	0.68644	0.86267	1.1785
IEGPDVSIK	0	956.518	IPI00021812;IPI00555610	IPI00021812	2	0.05736	44.203	0.9829	0.91921	1.0254	0.83475	0.86287	0.94284
TTIIHMIK	0	955.552	IPI00015954;IPI00002149;IPI00966157;IPI00968137;IPI00644667;IPI00964410	IPI00015954	2	0.00046642	117.4	1.1065	0.81696	0.70293	0.66582	0.86299	1.3918
EEIEAQIK	0	958.497	IPI00010860;IPI00790782;IPI00216220;IPI00791380	IPI00010860	2	0.001999	97.635	0.95594	0.90716	0.91241	0.92674	0.86355	0.93777
IRYESITDPSK	0	1307.67	IPI00414676;IPI00555614;IPI00455599;IPI00514027;IPI00411633;IPI00382470;IPI00784295;IPI00910046;IPI00555565	IPI00382470	2,3	3.4407e-08	151.98	1.0015	0.92883	0.9502	1.0227	0.86357	0.86999
YKEETIEK	1	1038.52	IPI00027270	IPI00027270	2	0.034968	113.62	0.9977	0.89468	0.91445	0.86438	0.86366	0.93567
VVRTAIIDAAGVASIITTAEVVVTEIPKEEK	1	3221.81	IPI00784154;IPI00917575	IPI00784154	4	0.00057011	94.259	0.8284	0.79659	1.0096	1.0159	0.86372	0.92378
AYAAIAAIEK	0	1019.57	IPI00418313;IPI00298788;IPI00414335;IPI00556173;IPI00298789;IPI00219330	IPI00418313	2	6.8037e-08	145.89	0.99171	0.89946	0.95116	0.93651	0.86381	0.97381
IIADQAEARRSK	0	1356.75	IPI00025329	IPI00025329	2,3	3.6328e-06	148.18	0.93755	0.96041	1.0024	0.92811	0.86384	0.89558
WCEYGITFTEK	0	1432.63	IPI00902560;IPI00216026;IPI00455531;IPI00024145;IPI00917420;IPI00647902;IPI00647442;IPI00844015	IPI00902560	2	0.023574	54.7	0.97465	0.80819	0.80802	0.90045	0.86411	0.96136
IIAINANDPEASK	0	1354.71	IPI00470502;IPI00301109;IPI00654717;IPI00470503;IPI00964988;IPI00910509;IPI00413014;IPI00749469;IPI00968235	IPI00470502	2	0.00025297	111.39	0.93776	0.95512	0.93557	0.90647	0.86418	0.88918
IISIFSGTEK	0	1093.6	IPI00419979	IPI00419979	2	0.021003	56.359	0.945	0.8916	0.95747	1.0248	0.86418	0.87771
VSQGVEDGPDTK	0	1230.57	IPI00033130;IPI00640965;IPI00647006	IPI00033130	2	0.018213	58.487	0.92884	0.72669	0.71073	0.87027	0.86432	0.97337
WVPEITHHCPK	0	1402.68	IPI00909484;IPI00016786;IPI00910473;IPI00007189;IPI00642590	IPI00909484	2,3	0.0015358	90.05	0.95174	0.90614	0.90454	0.91788	0.86438	0.91724
VQAQVIQETIVPK	0	1451.83	IPI00017451	IPI00017451	2	9.918e-52	247.14	0.93943	0.90203	1.0034	0.99596	0.86457	0.93719
AIEAVAISPWK	0	1183.66	IPI00642211;IPI00647400	IPI00642211	2	4.3555e-08	154.66	0.90752	0.83055	0.93173	0.95577	0.8646	0.92408
DFIIQQTMIRVK	0	1490.83	IPI00220766	IPI00220766	2	3.2467e-13	167.2	0.97853	1.0343	0.93188	0.95029	0.86463	1.0137
DISTIEPIK	0	1014.56	IPI00025849;IPI00940656;IPI00449263;IPI00887411;IPI00018262;IPI00172487;IPI00007423;IPI00759824;IPI00647001	IPI00007423	1,2	3.0631e-06	125.56	0.99426	0.89191	0.93697	0.9474	0.86465	1.0358
GFGDRIISEVK	0	1219.66	IPI00029468;IPI00908883;IPI00029469	IPI00029468	2	0.0012166	92.866	0.91457	0.86562	0.89977	0.84227	0.86477	1.0016
QKPVQTFTEEK	0	1333.69	IPI00005087	IPI00005087	2	0.0007502	97.214	0.97932	0.85852	0.90138	0.82701	0.86478	0.93328
QISSCIPNIVPK	0	1354.73	IPI00001159	IPI00001159	2	2.9314e-05	122.42	0.96552	0.8693	0.89599	0.7926	0.865	1.0739
GPDETIRIK	0	1027.57	IPI00217223;IPI00815732;IPI00964123;IPI00963816	IPI00217223	2	2.0187e-09	179.51	1.0858	0.92659	0.83819	0.90645	0.86504	0.99112
IIDVVHPAAK	0	1061.62	IPI00018465;IPI00552072;IPI00952607	IPI00018465	2	6.0764e-08	147.95	0.95929	0.9748	0.93408	0.97559	0.8651	0.92765
ENAYDIEANIAVIK	0	1561.8	IPI00033143	IPI00033143	2	0.0092212	68.283	0.94737	0.92812	1.0299	0.89884	0.86517	1.0296
EAESSPFVERIIK	0	1503.79	IPI00027230;IPI00939289	IPI00027230	2	1.2426e-22	204.48	1.046	1.3903	1.4021	1.0214	0.86529	0.88484
DFMIQGGDFTRGDGTGGK	0	1857.83	IPI00646304;IPI00791367	IPI00646304	2	2.5849e-37	220.59	0.90796	0.89473	0.94612	0.91251	0.86533	1.0962
SQEQIAAEIAEYTAK	0	1650.81	IPI00843975;IPI00872684	IPI00843975	2	4.9802e-32	212.32	1.0402	0.84275	0.77905	0.78689	0.86539	1.1501
SKDDQVTVIGAGVTIHEAIAAAEIIK	1	2648.44	IPI00643920;IPI00942979;IPI00792641;IPI00940673;IPI00793119;IPI00789310	IPI00643920	3	4.9403e-63	231.49	1.0039	0.96804	0.94517	0.85464	0.86544	1.0564
AAAEAAAEAK	0	901.451	IPI00009542;IPI00337823;IPI00477809;IPI00941467;IPI00549529;IPI00910881	IPI00009542	2	0.0015015	95.573	0.93584	0.82984	0.84503	0.87251	0.86558	0.93855
VMQEQGTHPK	0	1153.56	IPI00019502;IPI00395772	IPI00019502	2,3	0.0010519	106.4	0.9571	0.93515	0.94936	1.0307	0.86558	0.96245
ATIRYFQHIIGK	0	1445.81	IPI00000877;IPI00922838;IPI00922127;IPI00922745	IPI00000877	2	8.7503e-06	140.24	0.94875	0.8742	0.8863	1.0037	0.86571	0.96734
KFIQENIFGICPHMTEDNK	1	2320.1	IPI00025252;IPI00847663	IPI00025252	3	9.7009e-46	173.51	1.121	1.4463	1.28	1.1079	0.86573	0.91477
DIIHDPGRGAPIAK	0	1458.79	IPI00012772;IPI00797230;IPI00909884;IPI00795138	IPI00012772	2,3	8.4443e-10	150.69	0.9559	0.84962	0.90052	0.93281	0.86613	0.93304
ARIQAGAEAK	0	1013.56	IPI00009542;IPI00337823;IPI00477809;IPI00941467;IPI00549529;IPI00910881	IPI00009542	2	6.7609e-16	198.25	0.97249	0.82425	0.87996	0.87621	0.86625	0.97888
IIGEYGIRNK	0	1161.65	IPI00221088;IPI00925580;IPI00879238;IPI00853062;IPI00879512	IPI00221088	2,3	6.1446e-08	155.42	0.96931	0.94486	0.94603	0.91908	0.86629	0.9416
EIIRVAQIIK	0	1181.75	IPI00007611;IPI00878218;IPI00789135	IPI00007611	2	4.4553e-08	152.54	0.96553	0.86838	0.91815	1.0637	0.86635	0.85285
IIASIVK	0	742.495	IPI00438229;IPI00438230	IPI00438229	2	0.016004	73.616	1.1973	1.0998	0.92976	0.93723	0.86641	0.99158
FSMPSIK	0	808.415	IPI00021812;IPI00555610	IPI00021812	2	0.025742	67.032	0.96154	0.89093	0.93914	0.76152	0.86648	1.1604
RVATPVDWK	0	1070.59	IPI00220301	IPI00220301	2	0.012073	67.563	1.0426	0.9776	0.92768	0.85633	0.86648	1.1047
TFDQITPDESK	0	1279.59	IPI00015842	IPI00015842	2	9.6018e-06	147.33	1.0451	0.84166	0.76739	0.83187	0.86653	1.1421
EIATVRTICSHVQNMIK	0	1999.03	IPI00031691;IPI00968128;IPI00965303;IPI00966707;IPI00795717;IPI00910195;IPI00909133;IPI00719047;IPI00967876	IPI00031691	2,3	5.8181e-36	214.82	0.85658	0.95626	1.0868	1.0169	0.86654	0.86779
STAGDTHIGGEDFDNRMVNHFIAEFK	0	2907.32	IPI00003865;IPI00037070;IPI00939595	IPI00003865	3,4	4.2435e-49	165.06	1.1163	0.81314	0.66523	0.72244	0.86658	1.2596
IAQIEEAK	0	900.492	IPI00029133;IPI00456747	IPI00029133	2	0.0031237	91.087	0.91029	0.82802	0.94744	0.97267	0.86675	0.90914
DAIQRARQIAAK	0	1339.77	IPI00641948;IPI00644386;IPI00853059;IPI00974019;IPI00375441	IPI00641948	2	0.040267	50.354	0.74892	0.7172	0.93056	0.97996	0.86677	0.93104
TTTRRIVDGK	0	1145.65	IPI00554788;IPI00795353	IPI00554788	2	0.014256	63.408	1.201	0.83996	0.67242	0.63621	0.86688	1.4018
RATDVMIAGK	0	1060.57	IPI00012007;IPI00935818	IPI00012007	2	0.0026802	88.187	1.0095	0.93752	0.91198	0.93074	0.8669	1.0419
SPAPGAPTRSPSTPAK	0	1520.79	IPI00607584;IPI00005024;IPI00908888	IPI00607584	3	0.00062251	101.3	0.98894	0.84769	0.89137	0.80251	0.86708	1.0383
SGGGGDIHQGFQSIITEVNK	0	2043	IPI00413451;IPI00749398;IPI00513699	IPI00413451	3	1.8852e-07	128.1	1.1798	0.89248	0.66362	0.81219	0.86717	1.0809
AIAGCDFITISPK	0	1391.71	IPI00744692	IPI00744692	2	3.4603e-15	177.81	0.92673	0.89119	0.9718	0.99812	0.86765	0.93553
EANNFIWPFK	0	1264.62	IPI00871827;IPI00472171;IPI00030179;IPI00794746;IPI00878826	IPI00871827	2	3.9867e-07	167.09	0.95219	0.94681	0.96923	1.0629	0.86766	0.89499
YAIEIQK	0	863.475	IPI00419916;REV__IPI00789837;REV__IPI00893576;REV__IPI00383061;REV__IPI00641739;REV__IPI00854610;REV__IPI00329085;REV__IPI00647281	IPI00419916	2	0.00042624	113.89	1.0556	0.99315	0.86079	0.84098	0.86797	1.0311
IKGDDIQAIKK	2	1227.72	IPI00477313;IPI00216592;IPI00909232;IPI00759822;IPI00911096	IPI00477313	2,3	0.00022829	150.04	1.1203	0.86754	0.90195	0.86746	0.86818	1.0682
YQAVTATIEEK	0	1251.63	IPI00304612;IPI00398983;IPI00398949;IPI00432865	IPI00304612	2	0.00019644	120.57	0.9973	0.93084	0.92396	0.92073	0.86825	0.98462
KYDAFIASESIIK	1	1483.79	IPI00412579;IPI00478277	IPI00412579	2	1.594e-06	133.48	0.98246	0.84157	0.89912	0.93336	0.86827	0.9822
VYASQRMRAGK	0	1265.67	IPI00003918;IPI00795303;IPI00908662;IPI00878133	IPI00003918	2,3	0.00057994	106.62	1.2559	0.86824	0.6622	0.92832	0.8683	0.96702
TIISIMTREK	0	1190.67	IPI00394838;IPI00021290;IPI00939422	IPI00394838	2	0.005362	75.416	1.0469	0.80827	0.81078	0.71469	0.86843	1.2118
GDECQIVGPAQPSHWK	0	1807.83	IPI00014898;IPI00186711;IPI00398002;IPI00398778;IPI00398777;IPI00398779;IPI00398775;IPI00420096;IPI00398776	IPI00014898	2	0.0031936	75.463	0.86034	1.083	1.2018	1.0064	0.86843	0.91288
GPIATGGIK	0	812.476	IPI00006378;IPI00745538;IPI00791902	IPI00006378	2	0.00141	108.98	1.048	0.86283	0.79794	0.85104	0.86868	1.0828
IVGCSVHK	0	898.469	IPI00477313;IPI00216592;IPI00909232;IPI00759596;IPI00868835;IPI00910718;IPI00910666;IPI00790685;IPI00166137	IPI00477313	2	0.0011611	102.51	0.79805	0.72562	0.82057	0.84303	0.86883	1.0981
IVRDAFAIAK	0	1102.65	IPI00018398	IPI00018398	2	1.5656e-05	133.81	0.96537	0.92905	1.0294	0.87361	0.86886	0.82635
VNDTIQIDIETGK	0	1444.74	IPI00217030	IPI00217030	2	0.018368	58.071	0.89151	0.84094	0.90854	0.97553	0.86891	0.89614
GGKPEPPAMPQPVPTA	0	1572.8	IPI00011253;IPI00974484	IPI00011253	2	0.00077275	97.767	0.97216	0.95099	0.94992	0.78619	0.86897	1.1044
FIDASGAK	0	807.413	IPI00916503;IPI00916112;IPI00785096;IPI00918019;IPI00180128;IPI00917597;IPI00916463;IPI00915826;IPI00916588	IPI00916503	2	0.041907	53.775	1.0288	0.88884	0.93112	0.83356	0.86907	1.0165
MRYVSVRDFK	0	1299.68	IPI00221222;IPI00930562	IPI00221222	2,3	0.0024185	89.827	0.9453	0.88401	0.89259	0.90339	0.86963	0.99737
WGDEHIPGSPYRVVVP	0	1806.91	IPI00333541;IPI00302592;IPI00644576;IPI00553169	IPI00333541	2	0.00022023	110.77	1.0934	1.0152	0.83034	0.96113	0.86986	0.75949
KPPIINNADSVQAK	0	1493.82	IPI00449049	IPI00449049	2	2.2559e-10	159	1.0318	0.99514	1.0425	0.99159	0.86989	0.93045
TVAIWDIRNIK	0	1327.76	IPI00646512;IPI00395865;IPI00879702;IPI00647914;IPI00642026;IPI00328319;IPI00877934;IPI00645329;IPI00877802	IPI00328319	2,3	0.00025052	123.67	1.0569	0.95986	0.80013	0.74225	0.86992	1.1545
GVAINFVK	0	846.496	IPI00009328	IPI00009328	2	0.0013216	110.81	0.91974	0.88051	0.90481	0.88442	0.86994	1.0333
EDPTVSAIITSEK	0	1388.7	IPI00019755;IPI00642936;IPI00513927	IPI00019755	2	6.8471e-15	170.18	0.93887	0.93543	0.97562	0.88	0.86999	1.0244
ERARIQIEISK	0	1341.77	IPI00216952;IPI00021405;IPI00216953;IPI00644087;IPI00655812;IPI00514204	IPI00216952	2	0.0068462	71.153	0.84602	0.87722	0.91606	0.84921	0.87028	0.98642
IIDAAYK	0	792.438	IPI00552671;IPI00871326	IPI00552671	2	0.0027799	97.071	1.0009	0.96009	1.0467	0.89917	0.87035	1.0125
DNMAIQRVREAAEK	0	1629.83	IPI00007765;IPI00922694	IPI00007765	2	0.0012247	88.282	1.0146	0.92501	0.93058	0.89817	0.87041	0.94088
VAQAPWK	0	798.439	IPI00889534;IPI00011062;IPI00397498	IPI00889534	2	0.0024861	99.171	0.92583	0.83584	0.95699	0.92854	0.87042	0.97018
IMTVRIVK	0	958.6	IPI00008433;IPI00555941	IPI00008433	2	7.967e-05	149.65	0.99808	0.92939	0.8997	0.94176	0.87043	0.95525
VVEEITRIH	0	1094.61	IPI00293464;IPI00909008;IPI00909251;IPI00909177	IPI00293464	2	2.8024e-22	136.63	1.0427	1.0029	0.96672	0.91027	0.87046	0.84813
QIGRIMIK	0	957.579	IPI00029266;IPI00068430;IPI00071399;IPI00647942	IPI00029266	2	1.1339e-12	166.05	0.96196	0.84353	0.88724	0.82695	0.87065	1.076
YVGIVRVIAK	0	1116.7	IPI00783271	IPI00783271	2	1.48e-12	179.37	1.0153	0.87204	0.86806	0.90847	0.87106	0.98812
ETVQTTEDQIIK	0	1403.71	IPI00307162;IPI00291175;IPI00910496;IPI00909711	IPI00307162	2	5.1625e-10	164.48	1.0349	0.92708	0.8639	0.91159	0.87107	0.97082
SPAITATIEGK	0	1086.59	IPI00328154;IPI00375533;IPI00917001	IPI00328154	2	0.0058107	73.781	1.1017	0.87579	0.75348	0.84314	0.87136	1.0627
EVNVSPCPTQPCQISK	0	1842.86	IPI00301579;IPI00940960	IPI00301579	2,3	0.00017477	110.84	0.94773	0.95383	1.0044	1.0115	0.87148	0.85535
GEGQIGPAERAK	0	1211.63	IPI00186290;IPI00909570	IPI00186290	2,3	3.9726e-79	179.67	0.89343	0.84486	0.9277	0.89477	0.87168	0.99937
VWNIANCK	0	1003.49	IPI00848226;IPI00964877;IPI00965459;IPI00964790;IPI00966111;IPI00967792;IPI00967322;IPI00967577;IPI00966041;IPI00967345;IPI00964313;IPI00964025;IPI00910724;IPI00967585	IPI00848226	2	0.0024654	98.523	0.95382	0.88544	0.95022	0.99293	0.87186	0.99286
FAANPNQNK	0	1002.49	IPI00301936;IPI00940851	IPI00301936	2	0.013079	69.825	1.0399	0.92462	0.86225	0.83701	0.87191	1.0767
AIWFQGRCVK	0	1263.65	IPI00789551;IPI00017297;IPI00967721;IPI00964862;IPI00965324;IPI00964854	IPI00789551	2	4.1817e-23	214.12	0.95677	0.91239	0.89643	1.028	0.87217	0.85308
VPEWVDTVK	0	1071.56	IPI00215780	IPI00215780	2	0.051822	46.001	0.90653	0.85364	0.96188	0.99826	0.87228	0.89503
KYEDICPSTHNMDVPNIK	1	2160	IPI00376005;IPI00411704;IPI00006935;IPI00946642;IPI00946502;IPI00945644;IPI00855924	IPI00376005	2,3	3.1663e-56	258.8	0.94037	1.0128	1.0608	1.0262	0.87231	0.90827
ASIHEAWTDGK	0	1213.57	IPI00013808;IPI00969112;IPI00908458;IPI00921118;IPI00759776;IPI00013508;IPI00909239	IPI00013808	2	1.2477e-12	165.63	0.98891	0.88164	0.83991	0.92565	0.87274	0.9377
VSNSGITRVEK	0	1188.65	IPI00302927;IPI00893358;IPI00921414	IPI00302927	2	2.211e-08	156.69	0.95002	0.79777	0.86245	0.98723	0.87274	0.92553
GSAITGPVAK	0	899.508	IPI00010153;IPI00795408	IPI00010153	2	6.7267e-10	164.97	0.965	0.85217	0.83874	0.75838	0.87296	1.1493
FIDGIYVSEK	0	1169.6	IPI00031691;IPI00968128;IPI00965303;IPI00795717;IPI00719047;IPI00967876;IPI00789747	IPI00031691	2	0.0001173	137.89	1.0235	0.89205	0.93667	0.91799	0.87301	1.1123
VDTEDIEK	0	947.445	IPI00033130;IPI00640965;IPI00647006	IPI00033130	2	0.052236	49.418	0.96849	0.85437	0.88054	0.85172	0.87304	1.0173
GKVEEVEIPVEK	1	1354.73	IPI00018522;IPI00382516;IPI00215734;IPI00914913;IPI00549813;IPI00747005;IPI00909470	IPI00018522	2	4.3111e-28	145.1	0.91554	0.79974	0.91078	0.91067	0.87319	0.88443
AQAAAPASVPAQAPK	0	1376.74	IPI00419919;IPI00796934;IPI00173589;IPI00792866;IPI00792336;IPI00052885	IPI00419919	2,3	4.5358e-32	213.99	0.98517	0.86355	0.90284	0.98295	0.87333	0.97864
IKPVHGIIFIFK	0	1410.88	IPI00642374;IPI00549849;IPI00299313;IPI00219513;IPI00549820;IPI00641843;IPI00219512;IPI00549253	IPI00642374	2	0.0015245	89.171	0.91539	0.85154	0.83611	1.0341	0.87338	0.7887
IENVPTGPNNKPK	0	1406.75	IPI00007346;IPI00643915;IPI00645020	IPI00007346	2,3	5.8873e-10	168.98	0.92294	0.82833	0.98887	1.0949	0.87365	0.90953
RIIFSTITSK	0	1164.69	IPI00020042;IPI00738042;IPI00216770	IPI00020042	2	0.0074985	72.531	1.0183	0.88103	0.95316	0.92163	0.87372	1.0427
AGIQVYNK	0	891.481	IPI00011302	IPI00011302	2	1.8503e-05	133.6	0.94371	0.86103	0.92469	0.97036	0.87377	0.96394
ETINYMITSMAVEK	0	1628.78	IPI00783902;IPI00939856;IPI00876909	IPI00783902	2	0.049218	66.498	0.91775	1.1185	1.2047	0.93548	0.87384	0.89859
AVENSSTAIGIRCK	0	1504.77	IPI00419249;IPI00171199	IPI00419249	2	5.75e-16	183.81	0.91716	0.86449	0.95197	0.94257	0.87384	0.96907
GIGATTHPTAAVK	0	1222.67	IPI00102864;IPI00917193	IPI00102864	2	2.4498e-10	160.22	0.88505	0.81623	0.89762	0.73801	0.87386	1.1597
EEIERMVQEAEK	0	1489.71	IPI00304925;IPI00845339;IPI00909073;IPI00911039	IPI00304925	2	9.5734e-63	202.29	0.73072	0.69174	0.92352	0.88986	0.87412	0.99406
KIEMVRAYREK	1	1421.78	IPI00220642;IPI00910779	IPI00220642	2,3	0.0057613	76.332	1.0285	0.87206	0.87246	0.95248	0.87412	0.92629
IFEEIGK	0	834.449	IPI00002966	IPI00002966	2	0.011774	80.229	1.0794	0.95015	0.8181	0.89905	0.87414	0.99528
DIPEHAVIK	0	1020.56	IPI00479217;IPI00644224;IPI00883857;IPI00644079	IPI00883857	2	0.0006041	107.57	0.94672	0.94894	0.95022	0.92064	0.87455	1.0233
KYEFGESDIRSACDTVDTWIDDTAK	1	2921.3	IPI00456969	IPI00456969	3	1.6019e-08	107.56	0.99292	0.93066	1.041	0.96039	0.8747	0.8805
ITNSITVICSEK	0	1363.7	IPI00290461;IPI00910728	IPI00290461	2	0.0031096	77.894	0.9574	0.91765	0.94997	1.1181	0.87477	0.75422
ITTIPSDFCGITHIVK	0	1800.94	IPI00396321;IPI00968169	IPI00396321	3	2.5688e-05	119.87	0.89589	1.0941	1.1384	0.95881	0.8748	0.93494
DYNVTANSK	0	1010.47	IPI00947127;IPI00217966;IPI00607708;IPI00939286;IPI00908791;IPI00952964;IPI00795075	IPI00947127	2	3.5872e-06	141.08	0.9126	0.77183	0.88698	0.90237	0.87481	0.96696
VQVEYKGETK	1	1179.61	IPI00003865;IPI00037070;IPI00939595;IPI00910870;IPI00844513;IPI00877807;IPI00007702	IPI00003865	2,3	3.1672e-07	155.48	0.96913	0.86024	0.85242	0.91054	0.87487	1.0618
DIIGICEQK	0	1074.54	IPI00298961;IPI00893013	IPI00298961	2	0.0012389	105.98	1.0009	0.89524	0.89752	0.88462	0.87488	0.95482
YGVSGYPTIK	0	1083.56	IPI00025252;IPI00790740;IPI00893541	IPI00025252	2	0.00047905	112.13	0.90644	0.88156	0.91985	0.85277	0.87517	1.0551
DIEGISQRHEEK	0	1439.7	IPI00019502	IPI00019502	2,3	1.0721e-08	158.3	0.89309	0.80618	0.89052	0.92822	0.87531	0.86918
ERNTDQASMPDNTAAQK	0	1875.84	IPI00019502;IPI00395772;IPI00873982;IPI00743857;IPI00020501;IPI00744256;IPI00024870	IPI00019502	2,3	6.1495e-32	208.49	0.96974	0.92233	1.0046	1.0097	0.8757	0.81994
IDSRIEQYTSAIEGTK	0	1809.91	IPI00014516;IPI00218694;IPI00925125;IPI00218695;IPI00218696;IPI00816770;IPI00333771;IPI00926274	IPI00014516	2	1.5887e-05	125.45	0.95834	0.95571	1.073	0.9443	0.87573	0.91825
RGETSGRVDDNEETIKK	1	1932.95	IPI00640817;IPI00018342;IPI00515036	IPI00640817	3	0.00052708	102.64	1.0193	1.0482	0.94678	0.79063	0.87574	1.2585
GQIHHNPGEETRIEMDK	0	1989.93	IPI00419916;IPI00956631	IPI00419916	3	0.0001042	109.07	1.1334	1.0053	0.97708	0.8478	0.87575	1.1625
KIENCNYAVEIGK	1	1536.76	IPI00216694;IPI00947227;IPI00908503;IPI00010471;IPI00032304	IPI00216694	2	4.3736e-14	173.44	0.95505	0.88933	0.92903	0.9947	0.87591	0.90982
VADIGIAAWGRK	0	1255.7	IPI00012007	IPI00012007	2,3	6.8256e-06	136.96	0.9516	0.88564	0.97515	1.0001	0.87595	0.88039
IAAIGEATRIK	0	1141.68	IPI00014898;IPI00186711;IPI00398002;IPI00398778;IPI00398777;IPI00398779;IPI00398775;IPI00420096;IPI00398776	IPI00014898	2,3	3.8604e-27	208.56	0.97824	0.86332	0.93911	0.94623	0.87596	0.9773
EVGSHFDDFVTNIIEK	0	1848.89	IPI00745125;IPI00644020	IPI00745125	2	5.922e-42	226.74	0.93722	0.79495	0.84815	0.82575	0.87632	1.0354
IAGESESNIRK	0	1202.63	IPI00022774	IPI00022774	2	0.0021463	83.081	1.0199	0.9949	0.85166	0.76404	0.8764	1.072
KVEDMMK	1	879.419	IPI00186290;IPI00909570	IPI00186290	2	0.014282	84.498	0.8917	0.66128	0.68124	0.85843	0.87648	1.1692
YAIQSQQRWK	0	1306.68	IPI00001539	IPI00001539	2	4.3023e-08	169.41	0.99173	0.89519	0.94443	0.95021	0.87654	0.88425
KPADDQDPIDAISGDIDSCPSTTETSQNTAK	0	3276.46	IPI00761160;IPI00761140;IPI00760715;IPI00968085;IPI00305750;IPI00220857;IPI00964032;IPI00413492;IPI00921920;IPI00761035;IPI00761069;IPI00964761;IPI00967304;IPI00970915;IPI00965413;IPI00302047;IPI00760909;IPI00964956;IPI00939354	IPI00761160	3	1.6797e-98	269.06	0.90289	1.009	1.085	1.0132	0.87662	0.89496
IDQIRQRESDITK	0	1600.85	IPI00290566;IPI00550591;IPI00844203	IPI00290566	2,3	1.826e-10	166.62	0.95773	0.87093	0.95078	0.89161	0.87665	0.98141
RRAIAAPAAEEK	0	1281.72	IPI00008986	IPI00008986	2,3	3.4564e-06	138.45	0.91964	0.83575	0.87367	0.94125	0.87668	0.88312
VIQATVVAVGSGSK	0	1314.75	IPI00220362;IPI00916763	IPI00220362	2,3	1.4471e-21	188.59	0.95781	0.9724	0.97743	0.97208	0.87686	0.92419
AEHDSIIAEK	0	1111.55	IPI00329633;IPI00908949;IPI00967989;IPI00966149;IPI00966670;IPI00966983	IPI00329633	2	0.074013	36.585	0.97847	0.74516	0.74629	0.78829	0.87705	1.1071
VITPTQVK	0	884.533	IPI00219446;IPI00795288;IPI00908746	IPI00219446	2	0.00033781	117.4	0.89434	0.86317	1.0055	0.99169	0.87712	0.85275
DINAVAASIRK	0	1156.66	IPI00916503;IPI00916112;IPI00785096;IPI00918019;IPI00180128;IPI00917597;IPI00903257	IPI00916503	2	0.00057256	107.03	0.89495	0.96921	0.96008	0.88289	0.8773	0.85058
IICFYGPPGVGK	0	1306.67	IPI00005158;IPI00334291;IPI00642982	IPI00005158	2	1.0442e-05	133.23	0.88348	0.9119	1.0348	0.99956	0.87733	0.90959
VAPAPAVVK	0	850.528	IPI00299573;IPI00397676;IPI00478896	IPI00299573	1,2	0.010828	72.485	0.99877	0.97336	0.96144	0.9811	0.87737	0.94983
SDAIETIGFINHYQMK	0	1865.9	IPI00848328;IPI00647473;IPI00027834;IPI00465225	IPI00027834	2,3	1.9108e-215	242.26	1.0563	0.75018	0.68515	0.72887	0.87745	1.1931
VPVPEDK	0	782.417	IPI00220487;IPI00792135	IPI00220487	2	0.0076011	82.671	0.9157	0.8439	0.87438	0.89664	0.87751	0.93824
SIERAEAGDNIGAIVRGIK	0	1968.08	IPI00027107	IPI00027107	2,3	4.6071e-22	182.35	1.133	0.83531	0.75695	0.79682	0.87756	1.0863
VQASIAANTFTITGHAETK	0	1959.01	IPI00221035;IPI00419473;IPI00965254;IPI00967045	IPI00221035	2,3	4.31e-89	288.78	0.91376	1.0748	1.2809	1.1568	0.87757	0.81003
KTQEQIAIEMAEITARISQIEMARQK	1	3015.58	IPI00219365	IPI00219365	4	8.8397e-09	106.86	1.0326	1.1486	1.0213	1.1001	0.87759	0.9213
ANIVHIMISSPEQIQK	0	1806.97	IPI00022744;IPI00219994;IPI00910737;IPI00219762	IPI00022744	2,3	9.419e-19	177.58	0.96448	0.91968	0.92726	0.88498	0.8776	1.0237
DCEECIQIEPTFIK	0	1780.8	IPI00013894;IPI00479946;IPI00908463	IPI00013894	2	1.3104e-21	190.24	0.98853	0.87399	0.87566	0.90981	0.87795	0.99986
GYPHWPARIDEMPEAAVK	0	2066	IPI00020956;IPI00922032	IPI00020956	3	0.0045954	71.98	1.0302	0.86527	0.86226	0.7937	0.87802	1.0891
TCIDNIASK	0	1020.49	IPI00009342	IPI00009342	2	1.3471e-05	130.98	1.1133	0.85143	0.69083	0.67284	0.87818	1.2727
EIEVIIMCNK	0	1247.63	IPI00927658;IPI00395998;IPI00927458;IPI00794734;IPI00927895;IPI00927543;IPI00878895;IPI00878360	IPI00927658	2	9.8311e-05	121.83	0.92833	0.80482	0.96712	1.0396	0.87824	0.92295
DTSASAVAVGIK	0	1117.6	IPI00031522	IPI00031522	2	3.9458e-37	244.95	0.94212	0.81532	0.85378	0.81898	0.8783	1.0528
AGIPVYAWK	0	1003.55	IPI00012007;IPI00935818	IPI00012007	2	2.987e-09	163.77	0.96114	0.96496	0.96272	0.96036	0.87836	0.94615
TVIMNPNIASVQTNEVGIK	0	2027.07	IPI00889534;IPI00011062;IPI00397498	IPI00889534	2,3	6.7924e-73	268.65	0.95502	0.77106	0.85569	0.71459	0.87843	1.2217
APHIAYIRTGVK	0	1324.76	IPI00291419	IPI00291419	2	0.00015474	117.86	0.91777	0.81774	0.93598	0.9912	0.87855	0.91911
WISDWNITTEK	0	1391.67	IPI00102069	IPI00102069	2	0.045732	46.063	0.87685	0.85413	0.89458	0.9318	0.87871	0.88965
IQQITAIGAAQATAK	0	1483.84	IPI00015361;IPI00030303;IPI00792988;IPI00791925	IPI00015361	2	2.7148e-16	183.58	1.0353	0.91537	0.98028	1.0215	0.87872	0.95379
IVGYIDRNIEK	0	1318.72	IPI00219825;IPI00744835;IPI00873020;IPI00873201;IPI00012503;IPI00556640	IPI00219825	2	7.0837e-05	122.69	0.93518	0.86518	0.94576	0.99525	0.87951	0.89607
DICACAATGTGK	0	1223.53	IPI00293078	IPI00293078	2	8.2515e-29	225.15	1.0032	0.86357	0.78178	0.91043	0.8796	0.95106
ISSDIDGHPVPK	0	1263.65	IPI00643920;IPI00942979;IPI00946864;IPI00946973	IPI00643920	2,3	1.9734e-13	174.42	1.0512	1.0311	1.0274	1.0861	0.87965	0.88083
GRIDYISSIK	0	1150.63	IPI00554481;IPI00554611;IPI00604710;IPI00554722;IPI00027493	IPI00554481	2	8.5704e-06	151.98	0.92685	0.84902	0.88612	0.84698	0.87978	1.013
AAEGVSAADMAK	0	1119.52	IPI00304187;IPI00909372	IPI00304187	2	6.8988e-05	118.37	0.99649	0.89844	0.90873	0.94319	0.8798	1.1077
VHPAVVIRQRK	0	1301.8	IPI00010153;IPI00795408;IPI00791920;IPI00795751	IPI00010153	2,3	0.0017785	89.08	0.90211	0.86352	0.98287	1.0268	0.87997	0.89686
IQPAIQEK	0	925.523	IPI00015361;IPI00030303;IPI00792988;IPI00791925	IPI00015361	2	0.022624	65.246	0.85484	0.8714	0.99488	0.8116	0.8801	1.0823
VVASGPGIEHGK	0	1149.61	IPI00900293;IPI00289334;IPI00477536;IPI00943563;IPI00382697;IPI00953109;IPI00940093;IPI00945610;IPI00382698;IPI00382699	IPI00900293	3	0.0038474	75.819	0.99333	0.98402	1.0408	0.98222	0.88018	0.88346
GFYIYQEGVK	0	1202.6	IPI00031522	IPI00031522	2	3.4593e-05	149.23	1.0257	0.92221	0.87435	0.93081	0.88022	0.98356
ASIRTFVPK	0	1017.6	IPI00306369;IPI00966877	IPI00306369	2	0.053215	45.368	1.0825	0.81139	0.7718	0.88123	0.88023	1.0045
EAFRIINK	0	989.566	IPI00031517	IPI00031517	2	0.0091488	80.165	1.02	0.75433	0.78532	0.92716	0.88029	0.90334
STNEAMEWMNNK	0	1453.6	IPI00002966	IPI00002966	2	0.0015164	89.231	1.1315	0.68882	0.58845	0.66586	0.88054	1.3716
IIRIFPK	0	885.58	IPI00304911;IPI00007812;IPI00926751;IPI00848320;IPI00924887	IPI00304911	2	0.034989	59.641	0.96917	0.90458	0.973	0.92378	0.88091	0.90259
MGVPYCIIK	0	1079.55	IPI00299573;IPI00397676;IPI00642454	IPI00299573	2	0.00034641	114.93	0.94968	0.86111	0.90972	0.89187	0.88095	1.0596
ADVFHAYISIIK	0	1375.75	IPI00100160;IPI00604431;IPI00915424	IPI00100160	2	6.5685e-06	132.79	0.97522	0.95091	1.0808	0.97111	0.88106	0.94945
EMGGHHIVAICVIK	0	1562.81	IPI00218493;IPI00873466	IPI00218493	2	9.623e-200	225.97	1.0024	1.0227	1.0312	0.92136	0.88109	0.93973
SMGAIVRGFDTRAAAIEQFK	0	2167.12	IPI00337541;IPI00964130	IPI00337541	3	0.0049069	64.275	1.1289	0.8824	0.74864	0.77179	0.88112	1.1317
IAQIEEQIDNETK	0	1529.76	IPI00019502;IPI00395772;IPI00742780	IPI00019502	2	5.6593e-52	255.85	0.93096	0.93222	0.98994	1.0036	0.88116	0.93594
INWISVDFNNWK	0	1534.76	IPI00789101;IPI00789698;IPI00015029;IPI00908647;IPI00910575;IPI00910005	IPI00789101	2	0.00014909	110.29	0.94839	0.73058	0.87212	0.89484	0.8812	0.98824
ESQRSGNVAEIAIK	0	1500.79	IPI00332499;IPI00179953;IPI00219821;IPI00646459	IPI00332499	2	8.7224e-15	171.26	1.0022	0.88514	0.89587	0.91273	0.88126	0.96821
IIYNRPGTVSSIK	0	1446.82	IPI00020021;IPI00909779;IPI00942944;IPI00968273;IPI00967473	IPI00020021	2	2.0562e-06	145.81	0.96959	0.91362	0.9657	1.0013	0.88136	0.85959
VPPIKPNAGEESVMNIDK	0	1936.99	IPI00965327;IPI00964764;IPI00305166;IPI00217143;IPI00902754;IPI00964725	IPI00965327	2,3	2.3912e-05	113.28	1.0092	0.93223	1.0118	0.99411	0.88143	1.0235
SAVEAERIVAGK	0	1228.68	IPI00025874;IPI00793589	IPI00025874	2,3	1.999e-38	244.18	1.1057	0.80254	0.69692	0.7538	0.88152	1.1249
EIGNIISDAMK	0	1189.6	IPI00784154;IPI00917575;IPI00915941;IPI00917983	IPI00784154	2	7.9419e-14	189.24	0.89336	1.0653	1.0438	0.97864	0.88159	0.96293
SAEFIIHMIK	0	1187.64	IPI00413324;IPI00644171;IPI00394699;IPI00878444;IPI00642149	IPI00413324	2	6.7267e-10	172.88	1.1408	0.7944	0.74415	0.74047	0.8816	1.0165
GVIFYGPPGCGK	0	1250.61	IPI00022774	IPI00022774	2	7.3429e-06	142.43	0.90603	0.90275	1.0505	1.0041	0.88177	0.93695
AIIAAQIDNAIEK	0	1368.76	IPI00332428	IPI00332428	2	3.3116e-15	178.15	0.90207	0.8548	0.90466	0.86675	0.88179	0.94439
VNQFRQIYSK	0	1281.68	IPI00299608;IPI00456695	IPI00299608	2	0.0016105	93.096	1.0845	0.81203	0.75871	0.94581	0.8821	0.8897
AGNIGGGVVTIERSK	0	1456.8	IPI00219153;IPI00878392;IPI00879364	IPI00219153	2,3	3.4629e-55	253.46	0.96734	0.94975	0.97004	0.90218	0.88212	1.0339
WYPEVRHHCPNTPIIIVGTK	0	2416.25	IPI00219675;IPI00010271;IPI00394837	IPI00219675	3	0.039299	48.883	0.98019	0.96913	0.95311	1.353	0.88216	0.79326
FCDNSSAIQGK	0	1225.54	IPI00004534	IPI00004534	2	0.0020869	87.001	1.0603	0.98902	0.93894	0.92167	0.88221	0.91674
SIARRVYATIINAGTNTDGFK	0	2267.2	IPI00026781	IPI00026781	3	0.032705	49.865	1.0735	0.78304	0.77071	0.77248	0.88223	1.0888
GFGFGQGAGAIVHSE	0	1432.67	IPI00442073	IPI00442073	2	0	257.76	1.031	1.1141	0.93717	0.77498	0.88228	0.95957
VVVVVPNEEDWKK	1	1539.83	IPI00456887;IPI00929107	IPI00456887	3	0.004299	77.64	0.94249	0.88462	0.99464	0.94756	0.88237	0.94492
YNDTFWK	0	972.434	IPI00027230;IPI00939289;IPI00556538	IPI00027230	2	0.092609	40.045	1.0037	0.6099	0.63268	0.82701	0.88243	1.0392
VFDAIMNFKK	1	1211.64	IPI00186290	IPI00186290	2,3	9.8018e-18	145.25	1.0469	0.9539	0.90996	1.3532	0.88245	0.61187
KWNIDEIPK	1	1141.61	IPI00017617;IPI00798375	IPI00017617	2	0.014352	74.162	1.076	0.90159	0.8778	0.83946	0.88249	1.0039
FVTDIDEIGK	0	1135.58	IPI00023529;IPI00878174	IPI00023529	2	0.028946	53.237	0.96473	0.91139	0.96708	0.90444	0.88262	1.0021
DNTIEHIIPIFIAQIK	0	1864.05	IPI00554737;IPI00908543;IPI00910732;IPI00168184;IPI00798040	IPI00554737	2,3	4.7237e-36	224.43	1.0268	0.91041	0.82232	0.7802	0.88265	1.1395
ETDIIIDDSIVSIFGNRRIK	0	2303.25	IPI00024915;IPI00759663;IPI00375306;IPI00375307	IPI00024915	3	6.1974e-06	107.07	1.0406	0.91211	0.9337	1.0312	0.8827	0.8396
SISAIGNVISAIAEGSTYVPYRDSK	0	2597.33	IPI00012837	IPI00012837	3	1.4149e-18	153.36	1.0832	1.0027	0.87237	0.88695	0.88292	1.1345
DIFPYEESK	0	1126.52	IPI00020956;IPI00514127;IPI00514330	IPI00020956	2	0.00046819	119.75	0.96712	0.96879	1.0186	0.92039	0.88293	1.0118
TVAGGAWTYNTTSAVTVK	0	1825.92	IPI00414860;IPI00926815	IPI00414860	2	7.1317e-99	186.98	1.283	0.96912	0.75044	0.76526	0.883	1.1554
DIVVQETMEDIDK	0	1533.72	IPI00789155;IPI00941900	IPI00789155	2	1.83e-09	160.27	0.9787	0.93105	0.95479	0.95738	0.88321	0.96356
IIQAQGVEVPSK	0	1267.71	IPI00299254	IPI00299254	2	1.0032e-06	147.87	0.99658	0.88229	0.93016	1.1114	0.88322	0.85255
IGEEEIQKPEEK	0	1427.71	IPI00017451;IPI00470590	IPI00017451	2	2.3425e-13	179.93	1.094	0.90378	0.71005	0.99374	0.88323	0.81445
RIPEEIIGK	0	1053.62	IPI00003783;IPI00795187	IPI00003783	2	0.0025695	90.05	0.94543	0.86795	0.94375	0.88481	0.88334	0.98014
TISSASEKPK	0	1046.56	IPI00103595;IPI00940047;IPI00748061	IPI00103595	2	0.031387	52.278	0.97389	0.89395	0.89597	0.90836	0.88344	1.0591
IIIQHQK	0	878.534	IPI00935311;IPI00792837;IPI00013457;IPI00219759;IPI00788670;IPI00219760	IPI00935311	2	0.097414	41.302	0.88826	0.86199	0.85439	0.89702	0.88353	0.98617
FNVWDTAGQEK	0	1293.6	IPI00792352;IPI00796462;IPI00795671;IPI00643041	IPI00792352	2	3.9088e-13	179.35	0.96972	0.84063	0.8939	0.87428	0.88357	1.0091
VIEGMEVVRK	0	1158.64	IPI00646304;IPI00791367	IPI00646304	2,3	5.9867e-60	169.37	1.0369	0.96845	0.95502	1.0102	0.88362	0.92135
VYGPGVAK	0	789.438	IPI00333541;IPI00302592;IPI00644576;IPI00553169	IPI00333541	2	0.021189	66.682	0.90561	0.80817	0.94967	0.93905	0.88368	1.0135
AIITIADGRRDESIK	0	1656.92	IPI00024095;IPI00964070	IPI00024095	2,3	1.5786e-32	225.13	0.96308	0.92895	0.96642	0.97636	0.88371	1.0034
AIFEEVPEIITEAEK	0	1716.88	IPI00289499;IPI00925601;IPI00926426;IPI00927536	IPI00289499	2	5.8405e-10	153.23	0.88376	0.95988	1.0425	0.97486	0.88394	0.93469
KIGNNCVFAPADVTSEK	1	1848.9	IPI00017726;IPI00336094;IPI00639797	IPI00017726	2	8.2014e-27	204.78	0.90071	0.88363	0.96448	1.0131	0.88399	0.90887
DYNHWIATK	0	1146.55	IPI00889534;IPI00011062	IPI00889534	2	0.035946	52.49	1.0281	0.86109	0.83361	0.76502	0.88401	1.1483
AQTAHIVIEDGTK	0	1381.72	IPI00889534;IPI00011062;IPI00926199	IPI00889534	2,3	1.0651e-21	196.67	1.0379	0.90895	0.87714	0.89387	0.88424	1.007
TVAPMPPAQDHK	0	1290.64	IPI00025273;IPI00218408	IPI00025273	2,3	0.00049664	102.4	1.0172	0.82572	0.80099	0.72186	0.88427	1.1846
EKPSYDTETDPSEGIMNVIK	0	2252.05	IPI00395627;IPI00552308;IPI00940004	IPI00395627	2	5.3209e-31	198.77	0.8978	1.0635	1.2678	0.99077	0.88451	0.97504
EGIIIWCQRK	0	1301.69	IPI00013808;IPI00908458;IPI00908776;IPI00973960;IPI00032137;IPI00936352;IPI00019884;IPI00921118;IPI00759776;IPI00013508;IPI00909239	IPI00013808	2	1.1304e-25	209.6	0.96388	0.86227	0.87333	0.89395	0.88469	0.94666
FKDPNAPK	1	915.481	IPI00419258;IPI00645948;IPI00644653;IPI00018755;IPI00903004;IPI00742929;IPI00788220;IPI00737736;IPI00022796;IPI00643746	IPI00419258	2	0.015652	106.42	1.1365	0.98846	0.88978	0.79309	0.88471	1.2674
TFTAWCNSHIRK	0	1519.74	IPI00013808;IPI00908458;IPI00908776;IPI00845465;IPI00973960;IPI00032137;IPI00936352;IPI00019884;IPI00903019;IPI00921118;IPI00759776;IPI00013508;IPI00909239	IPI00013808	2,3	1.285e-08	148.18	1.0526	0.84331	0.76942	0.75302	0.88472	1.1053
QKPITPETAEK	0	1240.67	IPI00909484;IPI00016786;IPI00910473;IPI00007189	IPI00909484	2,3	0.00068291	100.93	0.92764	0.92503	0.94751	1.2165	0.88484	0.76789
TVVAICGQRDHASNIYK	0	1930.97	IPI00298851	IPI00298851	3	0.00040488	96.673	0.99903	0.79957	0.95297	0.70257	0.88497	1.3001
VITFYRK	0	925.539	IPI00002966	IPI00002966	2	0.022031	69.998	0.93991	0.90896	0.87665	1.0179	0.88504	0.87418
SEVIRVTHEIQAMK	0	1639.87	IPI00018398	IPI00018398	2	1.052e-06	138.21	1.0815	0.79906	0.72351	0.69321	0.8852	1.1708
FYEEVHDIERK	0	1463.7	IPI00017763;IPI00941463;IPI00798071;IPI00788840;IPI00789437;IPI00023860;IPI00789029;IPI00797545;IPI00902909;IPI00922322	IPI00023860	2,3	5.1176e-20	204.17	0.97811	0.86891	0.79295	0.83506	0.88523	1.0326
SIEDVVRAYIK	0	1291.71	IPI00029012	IPI00029012	2	0.00018817	126.71	0.99704	0.74595	0.75287	0.85806	0.8853	0.97319
TIAESAIQIIYTAK	0	1520.85	IPI00298994	IPI00298994	2	0.0010471	95.236	1.0784	1.2202	1.0607	1.5283	0.88531	1.0517
EQIIEEFSK	0	1121.56	IPI00018140;IPI00402183;IPI00930205;IPI00402182;IPI00402184;IPI00402185	IPI00018140	2	0.00039205	113.69	0.97414	0.86623	0.9925	0.85204	0.88542	0.93312
APIDIPVPDPVK	0	1259.71	IPI00748256;IPI00479722	IPI00748256	2	0.00019968	105.17	0.94144	0.87531	0.91073	0.95926	0.8855	0.95348
QIICGAAIGTHEDDK	0	1626.77	IPI00291510;IPI00925196;IPI00924999;IPI00795859;IPI00791628	IPI00291510	2	2.4236e-69	273.38	0.93504	0.87513	0.94318	0.89469	0.88558	0.99924
FQGGREASGIIK	0	1261.68	IPI00007163	IPI00007163	2	1.0524e-08	151.26	1.0199	0.83421	0.83051	0.77902	0.88561	1.1547
VVIIGDSGVGK	0	1042.6	IPI00020436;IPI00429190;IPI00941638;IPI00930720;IPI00911020;IPI00795676	IPI00020436	2	1.4454e-05	136.48	0.93062	1.0074	1.0167	0.97939	0.88576	0.88174
IIVATSVAARGIDVK	0	1511.9	IPI00329791;IPI00939523	IPI00329791	2	5.016e-07	138.19	0.98698	0.89875	0.93009	0.97398	0.88577	0.93868
RMATEVAADAIGEEWK	0	1775.85	IPI00021840;IPI00640929	IPI00021840	2,3	1.0535e-35	216.26	0.94651	0.88113	0.95388	1.0139	0.88593	0.93253
ETPAATEAPSSTPK	0	1385.67	IPI00299024;IPI00908521	IPI00299024	2,3	2.7225e-10	156.08	0.56933	0.52842	0.91121	0.93388	0.886	0.95253
MIIEIFSK	0	979.541	IPI00019755;IPI00642936;IPI00513927	IPI00019755	2	0.018048	69.825	1.0485	0.95642	0.95591	0.94499	0.88607	0.97023
ISMPDVDINIK	0	1243.65	IPI00021812;IPI00555610	IPI00021812	2	0.0028036	82.171	1.0303	0.94968	0.97481	1.1658	0.88611	0.83844
RIIGRRYDDPEVQK	0	1743.94	IPI00007765;IPI00966238	IPI00007765	2,3	9.7417e-16	177.81	0.90575	0.93401	1.0198	0.9905	0.88614	0.94482
AAAIEAMK	0	803.421	IPI00013894;IPI00479946;IPI00908463	IPI00013894	2	0.0030563	123.72	0.92094	0.83237	0.98384	0.87676	0.88626	1.0948
SAIAAAQTQVAEYK	0	1449.75	IPI00004962	IPI00004962	2	1.0756e-15	176.29	1.1171	0.74689	0.70798	0.69095	0.88634	1.2515
DDVAPESGDTTVK	0	1332.6	IPI00008708;IPI00642046	IPI00008708	2	0.0010439	91.858	0.95886	0.79369	0.84978	0.72443	0.88635	1.0703
FEEMIQQIK	0	1164.58	IPI00010720;IPI00964079;IPI00965269;IPI00964855;IPI00965722;IPI00940257;IPI00909956	IPI00010720	2	0.00024955	117.7	0.94512	0.78035	0.97805	0.88617	0.88638	1.1576
GERINQDQIDAVSK	0	1571.79	IPI00783872;IPI00873926;IPI00910763	IPI00783872	2	3.3295e-30	210.37	0.98183	0.78199	0.83655	0.89615	0.88648	0.93985
GEVSARQEIK	0	1115.59	IPI00186290;IPI00909570;IPI00440662	IPI00186290	2	5.2173e-16	201.33	0.73532	0.66988	0.87693	1.1238	0.88656	0.78118
INEIRQMSGAQIK	0	1486.79	IPI00012066;IPI00790627;IPI00470509;IPI00796337;IPI00216689;IPI00791223;IPI00900327;IPI00788837;IPI00027970;IPI00410587;IPI00550365;IPI00167750;IPI00796442;IPI00410586;IPI00101278;IPI00795754;IPI00790019;IPI00789448	IPI00012066	2	8.3088e-10	153.81	0.65015	0.6583	1.0415	0.9043	0.88663	0.88898
YTIGIGQAK	0	949.523	IPI00008475;IPI00963899	IPI00008475	2	0.00016669	144.77	1.0286	0.9279	0.95728	0.82268	0.88665	1.1644
KPMSIASGIVPAAPPK	0	1562.89	IPI00880007;IPI00396171;IPI00888475;IPI00878314;IPI00220113;IPI00927819;IPI00411375;IPI00924603;IPI00743873	IPI00880007	2	3.0962e-05	116.86	0.99147	0.88262	0.95363	0.98437	0.88672	0.98806
VNTIIRPDGEK	0	1240.68	IPI00789159;IPI00793523;IPI00794894;IPI00021266;IPI00397695;IPI00787625	IPI00789159	2	1.0643e-12	177.83	0.92581	0.93031	0.98221	0.89178	0.88687	1.0197
RSTVAQIVK	0	1000.6	IPI00440493;IPI00908963	IPI00440493	2	0.0014335	105.4	0.94168	0.87143	0.9063	0.86823	0.88694	0.993
KVAAIEAINDGEIQK	1	1597.87	IPI00032826;IPI00793211;IPI00892521	IPI00032826	2	0.00055913	106.36	0.9033	0.95071	1.0861	1.1776	0.88701	0.7975
GPEADSEWRRGPPEK	0	1709.81	IPI00029012	IPI00029012	3	0.011825	63.76	0.89359	0.92311	1.0075	0.98658	0.88715	0.91525
VIDSGAPIK	0	898.512	IPI00303476;IPI00791498	IPI00303476	2	0.0017316	103.55	0.9138	0.95692	1.0393	1.0247	0.88749	0.97046
MIVIDEADEMINK	0	1519.73	IPI00009328	IPI00009328	2	0	263.74	0.94009	1.0138	1.0508	1.0261	0.88751	0.89462
AVYTQDCPIAAAK	0	1406.69	IPI00910701;IPI00027442	IPI00910701	2	2.3426e-14	176.91	0.98627	0.92768	0.94188	0.86039	0.88777	1.0966
TSFVNFTDICK	0	1330.62	IPI00021728;IPI00176637	IPI00021728	2	6.7977e-06	149.23	1.1514	0.87391	0.84366	0.75076	0.8878	1.2815
TGVVPQIVK	0	939.575	IPI00002214;IPI00789457	IPI00002214	2	0.049866	46.891	1.0655	0.81515	0.72711	0.61699	0.88786	1.435
TVDNFVAIATGEK	0	1363.7	IPI00646304	IPI00646304	2	3.274e-15	178.23	1.0631	0.86777	0.81831	0.68286	0.88786	1.4004
VAGASRIIGVDINK	0	1411.81	IPI00746777;IPI00966735	IPI00746777	2	1.0624e-09	146.96	0.98417	0.93652	0.89301	1.0079	0.88799	0.94802
EIARAVVEK	0	1013.59	IPI00034319;IPI00554634;IPI00554556;IPI00945251;IPI00945375;IPI00946837	IPI00034319	2	0.0071013	77.662	0.90212	0.77772	0.90107	0.93205	0.88816	1.0065
EFPGFIENQK	0	1207.59	IPI00183695	IPI00183695	2	2.8231e-05	150.1	1.0213	0.9057	0.94386	1.0038	0.88821	0.89302
GNVFSSPTAAGTPNK	0	1446.71	IPI00014516;IPI00218694;IPI00925125;IPI00218695;IPI00218696;IPI00816770;IPI00333771	IPI00014516	2	2.2902e-32	222.45	0.99865	0.79023	0.85072	0.90982	0.88841	0.99504
VFGNEIK	0	805.433	IPI00604620;IPI00444262	IPI00604620	2	0.026608	62.659	1.0456	0.83236	0.84018	0.91989	0.88845	1.0141
KFGISVGHHIGK	1	1278.72	IPI00012069;IPI00619898;IPI00619966;IPI00910902	IPI00012069	2,3	0.00074007	103.08	1.0754	0.84656	0.80245	0.80523	0.88851	1.1466
GVGRRYAHVVIRK	0	1509.9	IPI00013296;IPI00397609;IPI00790711	IPI00013296	3	0.0025661	79.659	1.0666	0.91092	0.83926	0.80645	0.88857	1.3481
RTIAQDYGVIK	0	1262.7	IPI00000874;IPI00640741	IPI00000874	2	1.4627e-05	136.38	0.96795	0.93602	0.93473	0.9554	0.88859	0.97059
SIQEIFIAHIISPWGAEVK	0	2137.16	IPI00449049	IPI00449049	2,3	3.4985e-16	172	1.0499	0.91716	0.83429	0.88648	0.8887	1.0312
ENQIPEEAGSSGIGK	0	1514.72	IPI00790491;IPI00792465;IPI00014147;IPI00793987	IPI00790491	2	4.626e-05	118.21	1.1662	0.9573	0.88915	0.90352	0.88876	1.0471
IHMGSCAENTAK	0	1317.58	IPI00030363	IPI00030363	2	1.355e-08	147.26	0.92616	0.94231	0.97015	0.98341	0.88876	0.96163
DRPFFPGIVK	0	1174.65	IPI00604590;IPI00795292;IPI00026260;IPI00029091;IPI00797082	IPI00604590	2	0.0021652	87.149	0.97145	0.86207	0.92278	0.97176	0.88879	0.95806
AAIDWFDGK	0	1021.49	IPI00260715;IPI00221354;IPI00941083;IPI00645208;IPI00909890;IPI00428056;IPI00854677	IPI00260715	2	8.9861e-05	134.59	0.99356	0.97014	0.92079	0.98501	0.88903	0.98172
IIPRSIAPAGKD	1	1236.72	IPI00550882;IPI00941557;IPI00793698	IPI00550882	2	0.00090317	96.745	0.9303	0.8477	0.93513	0.99186	0.88966	0.85815
VEISQIRVAK	0	1141.68	IPI00412607;IPI00550247;IPI00455757	IPI00412607	2,3	0.0012452	101.38	0.97852	0.93985	0.96426	0.95777	0.88974	0.96549
WRPVDIAQVK	0	1210.68	IPI00871467;IPI00334532;IPI00646281	IPI00871467	2	0.0087748	70.808	1.0396	0.87374	0.98485	0.85098	0.8898	0.99602
AFTYINIDK	0	1083.56	IPI00022462;IPI00924935	IPI00022462	2	0.00034537	134.68	1.0017	0.80832	0.78817	0.88827	0.88993	1.0245
YEIQIANPK	0	1074.57	IPI00007928	IPI00007928	2	0.0011299	113.71	0.98244	0.95549	0.93513	0.91833	0.89006	1.0699
IGIEIIK	0	784.506	IPI00784154;IPI00917575	IPI00784154	2	0.00074519	103.92	0.94614	0.91572	0.93105	0.94478	0.89023	0.94882
ACIDTAVENMPSIK	0	1547.73	IPI00026781	IPI00026781	2	1.0057e-31	213.67	0.96677	0.86038	0.89603	0.89002	0.89027	0.98406
GESGQSWPRITK	0	1344.68	IPI00789101;IPI00789698;IPI00015029;IPI00908647;IPI00790462;IPI00910005	IPI00789101	2	1.2123e-08	156.36	0.94147	1.0067	1.0326	0.94241	0.89028	0.96012
FIRPHYGK	0	1016.56	IPI00012268;IPI00796340;IPI00795529;IPI00925595;IPI00794915	IPI00012268	2	0.0037703	87.616	1.0644	0.86291	0.84611	0.89124	0.89038	1.1958
IIQVASPFIEPHIVRMAK	0	2048.16	IPI00026625;IPI00376609;IPI00965680	IPI00026625	3	0.0050219	71.344	0.9229	1.0385	1.067	1.0243	0.89047	0.91272
NIEIAVMRRDQSIK	0	1671.91	IPI00024175;IPI00218372;IPI00647380	IPI00024175	2	0.0066273	71.558	0.89465	0.92446	0.9416	0.78204	0.89048	1.1341
TGETSRAISSSK	0	1222.62	IPI00221222;IPI00455831;IPI00963960;IPI00964232	IPI00221222	2	9.4458e-06	127.56	1.0234	0.68515	0.7274	0.62294	0.89051	1.2899
GYVVRISGGNDK	0	1263.66	IPI00021840;IPI00643522	IPI00021840	2	6.4713e-28	215.72	0.93202	0.89013	0.98088	0.92487	0.89064	0.98128
AIAPEYAK	0	861.46	IPI00010796;IPI00878551;IPI00911004	IPI00010796	2	0.0019961	103.56	0.87293	0.88399	1.0053	0.95235	0.89092	0.97632
EEAPDIICIQETK	0	1544.74	IPI00215911;IPI00792538	IPI00215911	2	5.7855e-15	172.57	0.97647	0.872	0.93496	0.91826	0.89123	0.89656
DIEADEEDTRKK	1	1447.68	IPI00021728;IPI00176637;IPI00816442	IPI00021728	2	0.00023896	124.12	1.0379	0.72867	0.76556	0.84748	0.8913	0.94057
KIITDEFVK	1	1091.62	IPI00009542;IPI00337823;IPI00477809;IPI00941467;IPI00549529;IPI00910881	IPI00009542	2	0.017275	68.893	0.93235	0.76887	0.83228	0.90346	0.89139	0.96429
RIGSIVDEFK	0	1162.63	IPI00644712;IPI00893062;IPI00889791;IPI00893179	IPI00644712	2	0.0075285	71.555	0.9695	0.84268	0.80106	0.89554	0.89141	0.95111
KEPAVIEIEGK	1	1211.68	IPI00008274;IPI00639931;IPI00939159	IPI00008274	2	0.03664	54.524	0.99825	0.85904	0.87183	0.90698	0.89144	1.0187
KDPQGIGIHFYK	1	1401.74	IPI00026625;IPI00376609;IPI00965680	IPI00026625	3	0.00090585	96.64	1.1081	0.87954	0.86349	0.90426	0.89153	1.1069
IGGAQNRSYSK	0	1179.6	IPI00293276	IPI00293276	2,3	1.9527e-08	160.67	0.776	0.80596	0.89373	0.9381	0.89172	0.97623
VDINAPDVEVHGPDWHIK	0	2040.01	IPI00021812;IPI00555610	IPI00021812	3	1.0922e-10	152.94	0.87849	0.99199	1.0228	1.0616	0.89195	0.93403
VGAIQRWIK	0	1069.64	IPI00024911	IPI00024911	2	2.7241e-09	163.9	1.0071	0.92487	0.93873	0.98456	0.89208	0.94014
FTITPSTTQVVGIIK	0	1603.92	IPI00026182;IPI00873113;IPI00908400	IPI00026182	2	1.4861e-15	181.26	0.916	0.93449	0.94084	0.6275	0.89213	1.3876
GDVAVVRINSPNSK	0	1454.78	IPI00031522	IPI00031522	2	9.6255e-15	167.32	0.92487	0.85395	0.89148	0.93059	0.89216	0.90555
IWDIEGK	0	859.444	IPI00848226;IPI00964877;IPI00965459;IPI00964790;IPI00966111;IPI00967792;IPI00964515;IPI00965193;IPI00965503	IPI00848226	2	0.023965	65.038	0.9736	0.92079	0.92296	0.95715	0.89219	0.97443
QVAPEKPVKK	1	1122.68	IPI00221222;IPI00455831;IPI00963960;IPI00964232	IPI00221222	2,3	2.9081e-12	192.12	0.91177	0.91345	0.98712	0.78347	0.89222	1.0457
IIQVRAASAPAK	0	1223.73	IPI00815713;IPI00815944;IPI00815731;IPI00965339;IPI00914061;IPI00165041;IPI00941770;IPI00969501;IPI00298696;IPI00555853;IPI00966633	IPI00815713	2	5.7138e-38	238.98	0.90769	0.92507	0.94989	1.0015	0.89237	0.96846
YGTRYGASIRK	0	1270.68	IPI00414860;IPI00926175;IPI00924813	IPI00414860	2	0.013525	62.466	1.011	0.95265	0.90234	0.77412	0.89242	1.1555
IEQSTIVK	0	916.523	IPI00219005	IPI00219005	2	0.00041317	115.7	1.0343	0.9176	0.94564	0.96224	0.89245	0.96312
EQSQITATQTRTVNK	0	1703.88	IPI00007928	IPI00007928	2,3	3.99e-23	192.65	0.9602	0.95916	1.0055	0.98615	0.89246	1.0428
IMIAVVK	0	772.488	IPI00221226;IPI00002459	IPI00221226	2	0.0029358	95.957	1.0075	0.88543	0.90303	1.0138	0.8925	0.95933
QVIVAPGNAGTACSEK	0	1600.79	IPI00025273;IPI00218408	IPI00025273	2	2.8733e-13	168.5	1.0302	0.87611	0.8445	0.98677	0.89262	1.0002
AIITPVAIAAGRK	0	1279.8	IPI00016862;IPI00953236;IPI00759575;IPI00953696	IPI00016862	2,3	8.1453e-23	211.46	0.9462	0.87141	0.9365	0.87705	0.89266	0.96812
IPVRHIYTK	0	1125.67	IPI00479217;IPI00644224;IPI00963858;IPI00883857;IPI00644079	IPI00883857	2	0.0012543	111.61	0.93676	0.91134	1.0453	1.0478	0.89272	0.90343
TQHEIIRQVNEMK	0	1624.84	IPI00026530	IPI00026530	2	0.012546	65.043	1.1336	0.81705	0.74779	0.59784	0.89282	1.508
AIPIEAEVAPVK	0	1235.71	IPI00880007;IPI00396171;IPI00888475;IPI00878314;IPI00220113	IPI00880007	2	1.3555e-13	177.93	0.92052	0.83508	0.90806	0.94034	0.89291	0.91649
ITVSNVIK	0	872.533	IPI00022462;IPI00924935	IPI00022462	2	0.0015899	100.02	0.96986	0.9254	0.93337	0.92724	0.89295	0.98025
GIIHSFDIIK	0	1141.65	IPI00012462;IPI00902564;IPI00945725;IPI00845305;IPI00945881;IPI00946890	IPI00012462	2	1.1938e-06	155.06	1.0684	0.76705	0.75932	0.86561	0.89296	1.1155
IGAPQTHIGIK	0	1133.66	IPI00060181;IPI00031091;IPI00552365;IPI00916914;IPI00915909;IPI00917888	IPI00060181	2	5.7525e-05	133.07	0.94169	0.90191	0.9732	0.93531	0.89302	1.0064
QPGVSEQQRHQIK	0	1533.8	IPI00171798	IPI00171798	2	0.028253	54.524	0.84893	1.1232	1.1112	1.0597	0.89321	1.2164
AIGAVPIIQGEYMIPCEK	0	1988.01	IPI00011229;IPI00853455;IPI00892793	IPI00011229	2	5.9033e-07	131.45	0.96388	0.99659	1.0693	0.93238	0.89322	0.92815
VVVTMEHSAK	0	1099.57	IPI00026516;IPI00964493;IPI00967390	IPI00026516	2	0.0019766	89.171	0.93516	0.90464	0.97728	0.93334	0.89323	0.95953
SAIASVIMGISPIIGK	0	1555.9	IPI00554737;IPI00908543;IPI00910732;IPI00168184;IPI00798040	IPI00554737	2	0.00012229	119.45	1.1574	0.8021	0.69519	0.72711	0.89346	1.2299
VIMRISK	0	845.516	IPI00219160	IPI00219160	2	0.00016966	120.46	0.95811	0.86863	0.93294	0.95304	0.89352	0.96243
SMEAEMIQIQEEIAAAERAK	0	2247.09	IPI00019502;IPI00395772;IPI00742780	IPI00019502	3	4.7126e-07	118.53	1.0094	0.9158	0.86722	0.77931	0.8936	1.0947
IFVGGISPDTPEEK	0	1487.75	IPI00028888;IPI00220683;IPI00220684;IPI00220685;IPI00903278;IPI00915340;IPI00964648;IPI00965952;IPI00967562	IPI00028888	2,3	1.4879e-21	188.09	0.94697	0.89136	0.98836	1.0118	0.89367	0.87069
KYPYWPHQPIENI	1	1683.84	IPI00220487;IPI00456049	IPI00220487	2	2.5435e-06	147.33	0.97807	0.86629	0.85256	0.84435	0.89371	1.0669
MDSTANEVEAVK	0	1292.59	IPI00010796;IPI00878551	IPI00010796	2	2.2431e-19	194.98	0.96381	0.8874	0.86728	0.83986	0.89393	1.1187
IFMAQAIQEYNN	0	1440.67	IPI00647650	IPI00647650	2	0.00071015	95.094	1.0457	1.2047	1.0445	0.91204	0.89404	0.87519
AQQVSQGIDVITAK	0	1456.79	IPI00307162;IPI00291175	IPI00307162	2	5.2378e-55	258.41	0.92934	0.89176	0.93641	0.90662	0.8941	0.96581
VIIDPVSVQDK	0	1211.68	IPI00644127;IPI00910980;IPI00514082	IPI00644127	2	0.0048817	74.76	1.0139	0.87166	0.88816	0.89033	0.89421	1.0287
YIQEIWRK	0	1134.62	IPI00470528;IPI00926202;IPI00927715;IPI00909437;IPI00910417;IPI00925058	IPI00470528	2	3.4238e-14	202.28	0.81993	0.97434	1.0896	0.98581	0.89426	1.1263
AIEAVFGK	0	833.465	IPI00304692;IPI00816796;IPI00939558;IPI00552938	IPI00304692	2	0.013481	71.692	1.0836	0.92843	0.9383	0.93919	0.89441	0.94659
VMRAAIEACHK	0	1284.64	IPI00746777	IPI00746777	2,3	0.00013649	128.85	0.9441	0.909	1.0015	1.0344	0.89454	0.91397
SDPSIVRIIQCDPSSASQF	0	2106.01	IPI00219103;IPI00219344	IPI00219103	2	0	240.68	1.1807	0.96853	0.76407	0.89626	0.89482	0.83055
SGVGNIFIK	0	933.528	IPI00008524;IPI00410017;IPI00796945;IPI00796139;IPI00556259;IPI00061206;IPI00306870	IPI00008524	2	0.00010824	123.63	1.32	0.79723	0.60849	0.8895	0.89518	0.90774
GIIDVTCK	0	904.469	IPI00788011;IPI00301364;IPI00974176;IPI00172421;IPI00719311	IPI00788011	2	3.2825e-05	124.98	0.95935	0.95923	1.0916	0.90592	0.89544	0.97795
VTADVINAAEK	0	1129.6	IPI00011200;IPI00642548	IPI00011200	2	0.00067202	101.53	1.0315	0.95623	0.98073	1.0105	0.89567	0.91663
KIVWVPSDK	1	1070.61	IPI00019502;IPI00556012;IPI00878695	IPI00019502	2	0.010833	77.662	0.90595	0.95695	0.97831	0.92532	0.89592	0.94461
IICRAHQIVHEGYK	0	1722.9	IPI00890743;IPI00012970;IPI00890827	IPI00890743	3	0.056048	46.88	1.0096	0.93796	0.96785	1.0021	0.89598	0.99135
ASAAIAAIEK	0	943.534	IPI00169430;IPI00413860	IPI00169430	2	0.017374	59.198	1.0197	0.85575	0.85593	0.9376	0.89609	0.96313
AAEEPSKVEEK	1	1215.6	IPI00219301	IPI00219301	2	0.0037176	115.33	0.82087	0.56332	0.88067	1.5294	0.89627	1.2065
IAVHCTVRGAK	0	1210.66	IPI00376798;IPI00746438;IPI00647674;IPI00647168	IPI00376798	2,3	7.4338e-13	173.71	0.88285	0.88605	0.94656	0.94453	0.89628	0.92088
SVGEVMAIGRTFEESFQK	0	2013.98	IPI00889534;IPI00011062;IPI00397498	IPI00889534	2,3	3.2389e-92	294.05	1.1039	0.82944	0.7843	0.74856	0.89633	1.2218
IITPAVVSERIK	0	1324.81	IPI00012750	IPI00012750	2,3	6.6591e-09	156.36	0.95085	0.9101	0.95295	0.96385	0.89645	0.95436
IQPIAISCVINIGACK	0	1755.94	IPI00003927	IPI00003927	2	0.00066822	100.23	0.92068	0.70067	0.81619	1.2201	0.89648	0.89412
TIGDFAAEYAK	0	1184.57	IPI00449049;IPI00973237	IPI00449049	2	0.0061486	72.958	1.1131	0.91833	0.88613	0.81077	0.89653	1.0916
VRAWGPGIEGGVVGK	0	1480.82	IPI00333541;IPI00302592;IPI00644576;IPI00553169	IPI00333541	2,3	8.4376e-41	229.23	0.92777	0.93229	0.98821	1.0085	0.89653	0.87935
FSVSGIK	0	736.412	IPI00021812	IPI00021812	1	1.1138e-06	94.262	1.2344	0.9073	0.83788	0.91891	0.89657	1.0148
GVVEVTHDIQK	0	1223.65	IPI00032140;IPI00910487	IPI00032140	2	1.081e-12	168.3	0.97955	1.0313	0.93636	1.0126	0.89689	0.91802
VEIYRIK	0	919.549	IPI00006579	IPI00006579	2	0.0051793	91.9	1.0574	0.95619	0.85911	1.0151	0.89693	0.88789
IIDIVARSIYSEK	0	1505.85	IPI00030275	IPI00030275	2	3.5885e-06	139.86	0.98397	0.91994	0.95416	0.96596	0.89733	0.91487
IDPIAPIDK	0	980.554	IPI00746777;IPI00966735	IPI00746777	2	0.0061081	81.338	0.94286	0.87045	0.90423	1.0433	0.89752	0.9034
EMQNISFQDCYSSK	0	1735.72	IPI00024993	IPI00024993	2	8.1728e-23	193.77	0.95648	0.98583	1.0423	1.033	0.8977	0.90249
YAFVNWINK	0	1153.59	IPI00216694;IPI00947227;IPI00010471;IPI00646259	IPI00216694	2	0.00019434	119.27	0.86057	0.82734	0.87365	0.9199	0.89774	0.9989
KTGQPMINIYTDRETGK	1	1950.98	IPI00260715;IPI00221354;IPI00941083;IPI00645208;IPI00909890;IPI00428056;IPI00854677	IPI00260715	3	0.0018862	86.548	1.0736	1.0188	1.0442	1.0242	0.89783	0.83709
RQRMESAIDQIK	0	1473.77	IPI00744692	IPI00744692	2	7.7938e-06	133.05	1.001	1.0549	1.0241	0.92085	0.89793	1.0283
THIIIFIPK	0	1080.67	IPI00010796;IPI00878551;IPI00879437	IPI00010796	2	0.00067603	123.35	1.0966	0.93378	0.8306	0.74159	0.898	1.2427
GNDVIVIECNIRASRSFPFVSK	0	2507.3	IPI00889534;IPI00011062;IPI00397498;IPI00926403	IPI00889534	3	2.1902e-06	102.59	0.80767	0.94347	1.1483	0.97525	0.89812	0.96997
IDDPTDSKPEDWDKPEHIPDPDAK	0	2759.26	IPI00020599	IPI00020599	3,4	3.2972e-12	125.92	0.91759	0.86203	1	1.0348	0.89819	0.9376
RIQEIDAASK	0	1129.61	IPI00014589;IPI00216472	IPI00014589	2	0.0019175	89.805	0.96075	0.89685	0.89739	0.94561	0.8984	0.92626
EIIDPVIDRIRK	0	1465.86	IPI00007750;IPI00794663;IPI00335314;IPI00794009;IPI00916823;IPI00797717	IPI00007750	2,3	0.0077149	71.153	0.91596	0.84726	0.97181	1.0065	0.89847	0.95154
YMGAAAMYIISK	0	1317.65	IPI00303568;IPI00947368;IPI00514138;IPI00395565	IPI00303568	2	3.2108e-29	147.91	0.94401	0.85361	0.90034	1.1041	0.89859	0.8093
TSAAISTVGSAISRK	0	1447.8	IPI00306825;IPI00221178;IPI00399265;IPI00399267;IPI00743469;IPI00399266;IPI00399268	IPI00306825	2	2.7459e-11	169.4	1.0521	0.82893	0.76617	0.71485	0.89873	1.2358
NIIDEEIQRIK	0	1369.76	IPI00014898;IPI00186711;IPI00398002;IPI00398778;IPI00398777;IPI00398779;IPI00398775;IPI00420096;IPI00398776	IPI00014898	2	0.00012428	129.82	0.94291	0.89588	1.0292	0.84672	0.89874	1.0162
IAHRIFEYK	0	1175.65	IPI00016862;IPI00953236;IPI00759575;IPI00953696	IPI00016862	2	0.055542	44.309	1.0178	1.037	0.92807	0.9086	0.89879	1.0915
ARINQYFQK	0	1166.62	IPI00844578	IPI00844578	2	6.5092e-06	138.1	0.88079	0.82749	0.91174	0.95527	0.89884	0.87793
TIIPIISQCTPK	0	1369.76	IPI00291006;IPI00924593;IPI00927864	IPI00291006	2	4.2379e-06	147.24	1.0511	0.83605	0.85181	0.76866	0.89885	1.1763
AWDIAIATMK	0	1118.58	IPI00219005	IPI00219005	2	0.00029769	114.83	1.0124	0.90858	0.84377	0.88636	0.89894	0.99274
EGVHGGIINKK	1	1150.65	IPI00216691	IPI00216691	2,3	7.3268e-19	188.28	0.93874	0.84543	0.95325	0.73739	0.89901	1.2289
RAIANSIACQGK	0	1287.67	IPI00796333;IPI00465439	IPI00796333	2	2.1499e-09	162.32	0.9473	0.89512	1.0091	0.96188	0.89913	1.0006
IKPGAPIRPK	0	1075.69	IPI00333541;IPI00302592;IPI00644576;IPI00553169;IPI00927825	IPI00333541	2	0.046052	71.451	0.94175	0.90572	1.0123	0.92835	0.89943	0.94268
ADIDITK	0	774.412	IPI00013296;IPI00397609;IPI00790711	IPI00013296	2	0.017111	73.931	1.0661	0.84955	0.78625	0.82721	0.8995	1.1242
YFPYYGK	0	936.438	IPI00008167;IPI00787965;IPI00787149;IPI00790573	IPI00008167	2	0.02645	62.714	0.96696	0.90934	0.8964	0.97512	0.89961	0.97018
RIFEAFK	0	909.507	IPI00221106;IPI00477803	IPI00221106	2	0.020499	71.223	1.0455	0.9642	0.8407	0.95163	0.89962	0.96568
YFPFMDIK	0	1059.51	IPI00291755	IPI00291755	2	0.013944	73.931	1.1208	1.1012	1.0365	0.93761	0.89969	0.98781
AANVIISEQGDVK	0	1342.71	IPI00945940;IPI00911046;IPI00292827;IPI00947554;IPI00844141;IPI00182383;IPI00760722;IPI00012093;IPI00893500;IPI00893092;IPI00893361;IPI00893689;IPI00892997;IPI00894210;IPI00893536;IPI00892960	IPI00945940	2	4.9373e-06	134.61	0.98671	0.92153	0.90521	0.8764	0.89975	0.98844
IAIASIGYEK	0	1063.59	IPI00938079;IPI00246058;IPI00797599	IPI00938079	2	0.00029989	129.16	1.0232	0.94342	0.9942	1.0193	0.89998	0.94644
KIDAGNQIAIIEEIHK	1	1790.99	IPI00001159	IPI00001159	3	3.451e-10	159.22	0.88744	0.83873	1.0364	1.0335	0.90011	0.84961
GCWDSIHVVEVQEK	0	1684.79	IPI00026185;IPI00642256;IPI00218782;IPI00646047;IPI00647677	IPI00026185	2	2.3286e-07	97.45	0.93648	0.8867	0.93438	0.87734	0.90014	1.042
VTVIFAGQHISK	0	1298.73	IPI00900293;IPI00289334;IPI00477536;IPI00943563;IPI00382697;IPI00953109;IPI00940093;IPI00945610;IPI00382698;IPI00382699	IPI00900293	2	1.4642e-08	145.81	0.91897	1.0163	1.0456	0.98206	0.90039	0.8974
EAEGAPQVEAGK	0	1184.57	IPI00014516;IPI00218694;IPI00925125;IPI00218695;IPI00218696;IPI00816770;IPI00333771;IPI00926274	IPI00014516	2	2.6124e-10	172.76	1.0567	0.78552	0.79916	0.99475	0.90047	0.93711
AIAIEEFCK	0	1079.53	IPI00020075;IPI00790966	IPI00020075	2	0.0019622	99.653	0.96296	1.9742	1.9934	0.94349	0.90053	0.87967
DAGEGIIAVQITDPEGKPK	0	1937.01	IPI00333541;IPI00302592;IPI00644576;IPI00553169;IPI00552416	IPI00333541	2,3	5.0708e-22	181.34	1.1606	0.99054	0.98136	1.0315	0.90055	0.86195
MIIYDPAK	0	949.494	IPI00026689;IPI00955014;IPI00073536	IPI00026689	2	0.0026768	96.253	0.96493	0.87145	0.85854	0.94261	0.90096	0.949
DFIAGGVAAAISK	0	1218.66	IPI00007188	IPI00007188	2	1.4035e-21	199.31	0.9042	0.83961	0.94069	0.95615	0.90106	1.0168
DDANNDPQWSEEQIIAAK	0	2042.92	IPI00217223;IPI00815732;IPI00964123;IPI00963816	IPI00217223	2	4.026e-176	381.45	0.96198	0.96663	1.0001	0.88218	0.90108	1.0846
AIPFWNEEIVPQIK	0	1682.9	IPI00930416;IPI00786897	IPI00930416	2	1.8067e-06	126.71	0.91258	0.93222	1.0306	1.058	0.90134	0.88059
SRVTQSNFAVGYK	0	1455.75	IPI00216308;IPI00790304;IPI00910830	IPI00216308	2	4.6137e-15	175.21	1.119	0.77205	0.7467	0.90209	0.90158	1.0977
GRNDIMEYAK	0	1195.57	IPI00020632;IPI00640430;IPI00642128	IPI00020632	2	6.7061e-08	163.12	0.9258	0.8149	0.87058	0.96307	0.9017	0.896
QTAIASRFIK	0	1133.66	IPI00646839;IPI00016910;IPI00922360	IPI00646839	2	9.3114e-06	152.7	1.0063	0.88484	0.8768	0.83741	0.90171	1.0822
SPFTVGVAAPIDISK	0	1500.82	IPI00900293;IPI00289334;IPI00477536;IPI00943563;IPI00382697;IPI00953109;IPI00940093;IPI00945610;IPI00382698;IPI00382699	IPI00900293	2	7.5626e-11	162.87	1.085	0.85807	0.78128	0.77653	0.90173	1.1799
IGVIHPDVITK	0	1190.7	IPI00300074	IPI00300074	2	0.00095696	94.616	0.96347	0.93223	0.9612	0.92052	0.90175	0.97318
GGVTGSPEASISGSK	0	1332.65	IPI00021812;IPI00555610	IPI00021812	2	2.3935e-10	160.27	0.87924	0.87167	0.93976	0.87738	0.90185	0.97243
TIQAIQIPAAK	0	1152.69	IPI00009342	IPI00009342	2	2.0947e-05	132.76	1.009	0.84472	0.81533	0.77965	0.90193	1.1634
SIAAATSAIVK	0	1030.6	IPI00298994;IPI00219299	IPI00298994	2	0.0083582	69.815	1.0896	0.7339	0.65914	0.67471	0.90207	1.2944
SINPDEAVAYGAAVQAAIISGDK	0	2259.14	IPI00003865;IPI00037070;IPI00939595	IPI00003865	2,3	4.1241e-46	219.32	1.0505	0.88002	0.79781	0.88551	0.90217	1.1185
AFAETHIK	0	915.481	IPI00783271	IPI00783271	2	0.0011611	102.51	0.97371	0.82123	0.89776	0.8555	0.90222	0.9485
SPEIQRAIRAPRK	0	1520.89	IPI00003918;IPI00795303;IPI00908662;IPI00953651	IPI00003918	3	0.084655	38.021	1.0275	0.81945	0.73104	0.78739	0.90225	1.2003
RGQAAIDRIK	0	1126.66	IPI00304612;IPI00398983;IPI00909017	IPI00304612	2	4.3631e-05	123.75	1.0567	0.85313	0.87503	0.81429	0.90232	1.2133
WSEPNEEEIIK	0	1372.65	IPI00026215	IPI00026215	2	3.3213e-07	96.604	1.0405	0.74267	0.82294	0.91902	0.90233	0.96383
IIINSIYK	0	962.58	IPI00027230;IPI00910360	IPI00027230	2	0.0058555	88.819	0.96372	0.90701	0.99172	1.0266	0.9024	0.9757
KEPGGGGGGGGGGGGGGGGVSSEK	1	1814.81	IPI00304992;IPI00843984	IPI00304992	3	4.4398e-05	84.107	0.85345	1.0162	0.92586	1.5837	0.90255	NaN
INHEGEVNRARYMPQNPCIIATK	0	2710.34	IPI00328319;IPI00877934;IPI00645329;IPI00877802;IPI00645757	IPI00328319	3	6.4719e-12	118.52	1.0972	0.77411	0.74245	0.79391	0.90265	1.1313
DKYPNIQVIGGNVVTAAQAK	1	2085.12	IPI00291510;IPI00925196;IPI00791628	IPI00291510	3	4.4819e-14	163.35	0.93332	0.87128	0.99551	0.98656	0.90268	1.0312
VVTVHIEK	0	923.544	IPI00550746;IPI00647418	IPI00550746	2	8.2904e-06	155.07	1.0271	0.95391	0.94931	1.0643	0.90275	0.97855
GAIRIIMRRDK	0	1327.79	IPI00414127;IPI00878075;IPI00878950;IPI00878611;IPI00879666;IPI00878795	IPI00414127	3	0.10075	33.89	0.95329	0.91992	0.89719	0.86876	0.90276	1.1256
FHPIQGHRVEVK	0	1445.79	IPI00011913	IPI00011913	2,3	3.0275e-05	128.08	0.99994	0.91387	0.90702	0.90895	0.90295	0.96195
MNSIPAERIQEIQK	0	1655.87	IPI00329692;IPI00218830;IPI00922811	IPI00329692	2	4.1289e-33	230.36	1.0476	0.916	0.90078	0.82166	0.90297	1.0128
EDQTEYIEERRVK	0	1693.83	IPI00414676;IPI00555614;IPI00514027	IPI00414676	2,3	2.8311e-16	187.11	1.0477	0.94337	0.92654	0.91099	0.90298	1.0208
IVWVPSDK	0	942.517	IPI00019502;IPI00556012;IPI00878695	IPI00019502	2	0.0045135	83.265	0.94322	0.84851	0.90712	0.9852	0.90311	0.89391
EINSNHDGADETSEK	0	1644.69	IPI00301311	IPI00301311	2	3.7189e-103	310.74	0.94506	0.97975	0.97298	1.0435	0.90311	0.77089
IRANAIIK	0	897.576	IPI00015602	IPI00015602	2	0.011114	77.058	0.92767	0.78061	0.8869	0.91401	0.90317	0.93072
FNWRVIK	0	961.55	IPI00016862;IPI00953236;IPI00759575;IPI00953696;IPI00794573	IPI00016862	2	0.0023607	100.07	1.0997	0.77886	0.70681	0.6608	0.90322	1.2672
CIATGPGIASTVK	0	1273.67	IPI00900293;IPI00289334;IPI00477536;IPI00943563;IPI00382697;IPI00953109;IPI00940093;IPI00945610;IPI00382698;IPI00382699;IPI00798140	IPI00900293	2	0.00019269	102.73	1.0294	1.0355	1.0706	0.80944	0.90334	1.1345
RNQSFCPTVNIDK	0	1577.76	IPI00456758	IPI00456758	2,3	4.5175e-07	139.86	1.0134	0.8625	0.84655	0.87475	0.90334	1.0804
FEDENFIIK	0	1153.57	IPI00419585;IPI00925747;IPI00925411	IPI00419585	2	3.0926e-12	175.93	0.94878	0.82167	0.88825	0.90985	0.90339	1.0626
VAINVSCANIIDK	0	1415.74	IPI00024403	IPI00024403	2	0.00016413	117.08	0.97264	0.96241	0.91451	1.0764	0.90358	0.80756
VVIVIAGRYSGRK	0	1416.86	IPI00219155;IPI00792879	IPI00219155	3	0.0032756	76.143	0.96706	0.8763	0.92905	1.0496	0.90361	0.90629
VAAAMPVRAADK	0	1198.65	IPI00910816;IPI00013830	IPI00910816	2	4.3424e-09	167.12	0.94131	0.88731	0.899	0.99653	0.90379	0.97831
IIATEQEDAAVAK	0	1357.71	IPI00856098;IPI00215743;IPI00220967;IPI00744135	IPI00856098	2	1.2288e-21	190.37	0.96326	1.0004	1.0194	0.95834	0.90382	0.94071
IVPQQIAH	0	904.513	IPI00021785	IPI00021785	2	1.4738e-05	135.87	0.95959	0.94242	0.93287	0.88733	0.9044	0.91607
RIIVPIIIPEK	0	1289.84	IPI00759799;IPI00788684;IPI00025292;IPI00792565;IPI00798419;IPI00105068;IPI00796533;IPI00789868	IPI00759799	2	0.00052216	103.43	0.97592	0.98181	0.95373	0.94155	0.9044	0.92931
DVVTAAGDMIK	0	1118.56	IPI00219825;IPI00744835;IPI00873020;IPI00873201;IPI00012503;IPI00556640	IPI00219825	2	1.7474e-05	134.75	0.99967	0.90142	0.87033	0.93777	0.90442	0.9911
RIIMEHIHK	0	1175.66	IPI00025329	IPI00025329	2,3	0.00011278	129.85	0.97736	0.88063	0.94013	0.86604	0.90443	1.0268
IVIPMIK	0	812.519	IPI00939304;IPI00793443;IPI00937471	IPI00939304	2	0.0044688	91.584	0.95595	0.9002	0.98856	0.9391	0.90447	0.9732
ENPRNFSDNQIQEGK	0	1774.82	IPI00647915;IPI00550363;IPI00644531	IPI00647915	2,3	2.2093e-32	222.75	0.95399	0.90628	0.96058	0.98262	0.90447	0.98536
IWNTIGVCK	0	1089.56	IPI00848226;IPI00964877;IPI00965459;IPI00964790;IPI00967322;IPI00967577;IPI00964515;IPI00966041;IPI00964313;IPI00964025;IPI00910724;IPI00967585;IPI00965671;IPI00910221;IPI00966919	IPI00848226	2	0.00068038	116.3	1.021	0.90467	0.89454	0.92728	0.90451	0.98956
ARAYGRGIEPTGNMVK	0	1718.89	IPI00900293;IPI00289334;IPI00477536;IPI00943563;IPI00382697;IPI00953109;IPI00940093;IPI00945610;IPI00382698;IPI00382699	IPI00900293	3	0.0017017	85.837	0.90658	0.90141	0.9855	0.97715	0.9046	0.92642
IYEQISGK	0	936.492	IPI00219446;IPI00794584	IPI00219446	2	0.00045317	130.66	1.0813	0.95576	0.98857	0.98032	0.90473	0.9566
EIITSFGPIK	0	1103.62	IPI00031556;IPI00830039	IPI00031556	2	1.6486e-05	148.32	1.0268	0.91124	0.97867	1.0546	0.90473	0.9254
AITPQAQEEIQK	0	1354.71	IPI00237884;IPI00867627;IPI00940222	IPI00237884	2	0.00059075	96.82	0.86192	0.87634	1.0089	0.87886	0.90477	0.9664
SETSGSFEDAIIAIVK	0	1665.85	IPI00793199;IPI00872780	IPI00793199	2	5.7119e-19	108.63	1.0182	0.84518	0.79421	0.73976	0.9049	1.34
QVPVDVVEMK	0	1142.6	IPI00719752;IPI00396370	IPI00719752	2	0.016459	60.434	1.2755	0.93885	0.74708	0.98612	0.90507	0.98548
ICMQRFIK	0	1094.57	IPI00217030;IPI00646114;IPI00302740;IPI00643830;IPI00877922	IPI00217030	2	9.0067e-06	139.31	0.89875	0.95123	0.97607	0.99246	0.90517	0.88762
TIVSVTK	0	746.454	IPI00382470;IPI00784295;IPI00604607;IPI00555957	IPI00382470	2	0.00071638	111.82	1.0468	0.91577	0.87631	0.74596	0.90518	1.2688
IGNTGGMIDNIIASK	0	1502.78	IPI00394838;IPI00021290;IPI00939422;IPI00935456	IPI00394838	2	4.9513e-16	176.28	0.96268	0.90649	0.98359	0.96158	0.90526	0.951
EEAYNSIMK	0	1083.49	IPI00783271;IPI00917975	IPI00783271	2	0.0023092	90.827	1.0311	0.96982	0.95268	1.0573	0.90537	0.91177
DCRYAIYDATYETK	0	1767.78	IPI00012011;IPI00909841	IPI00012011	2,3	2.9752e-16	187.97	0.98624	0.92485	0.91827	0.93587	0.90539	0.9698
KIDEAVAEAHIGK	1	1379.74	IPI00012007;IPI00935818	IPI00012007	2,3	6.9459e-10	155.98	0.97292	0.95099	1.006	0.89276	0.90552	0.97954
TSTRQTYFIPVIGIVDAEK	0	2137.14	IPI00018398	IPI00018398	2	0.0019878	74.776	1.098	0.91699	0.88328	0.90161	0.90557	1.003
EVFPVIAAK	0	972.564	IPI00938079;IPI00246058;IPI00924996	IPI00938079	2	0.0017423	95.502	0.94996	0.94302	0.97974	0.94489	0.90567	0.97796
YNQIIRIEEEIGSK	0	1690.89	IPI00465248;IPI00759806	IPI00465248	2,3	2.2444e-42	232.53	0.98637	0.93698	0.93877	0.90938	0.90568	1.0187
EIIPEIREK	0	1125.64	IPI00332499;IPI00179953;IPI00219821;IPI00646459	IPI00332499	2	0.0015149	107.21	1.0054	0.86845	0.80351	0.94984	0.90578	0.97663
IIGIIAIIDEGETDWK	0	1784.96	IPI00470502;IPI00301109;IPI00654717;IPI00470503;IPI00964988;IPI00910509;IPI00413014;IPI00749469;IPI00968235	IPI00470502	2	0.001471	88.561	0.94166	0.93716	1.0621	1.1104	0.90595	0.85775
KPAIQSSVVATSK	0	1314.75	IPI00789041	IPI00789041	2	0.00015108	118.51	0.92134	0.8189	0.92527	0.98382	0.90623	1.0067
GPQVRDWSHYFK	0	1518.74	IPI00554788;IPI00942338;IPI00794267	IPI00554788	2,3	1.5009e-13	177.1	0.96173	0.9065	0.92563	1.0408	0.90623	0.90664
MAEEIKPMDTDK	0	1406.64	IPI00477231;IPI00181391;IPI00941608;IPI00465449	IPI00477231	2	3.9111e-09	167.71	0.97976	0.88066	0.91625	0.91746	0.90632	1.0057
AVADRIIEMTSRK	0	1488.81	IPI00290952;IPI00032374	IPI00290952	3	0.0031227	76.326	1.0217	0.89048	0.85437	1.0605	0.90639	0.84092
VSFTGSVPTGMK	0	1209.61	IPI00479877	IPI00479877	2	0.00083423	94.191	0.92166	0.95706	0.98374	1.0555	0.90646	1.0223
GTGIHRYVWIVYEQDRPIK	0	2329.23	IPI00219446;IPI00795288;IPI00908746;IPI00795701	IPI00219446	3	5.3135e-15	160.43	1.0283	0.91736	0.832	0.77038	0.90659	1.1734
IEAIITPPPAK	0	1148.68	IPI00304171;IPI00059366;IPI00744148;IPI00966623	IPI00304171	2	0.00068974	100.55	0.87934	0.79609	0.96202	0.97366	0.90672	0.90785
DVIVRHIPK	0	1075.65	IPI00024364;IPI00843876;IPI00908817	IPI00024364	2	0.11226	28.696	1.0538	0.85706	0.85691	0.90319	0.90674	0.98008
IVIVGDGACGK	0	1087.57	IPI00478231;IPI00927114;IPI00552834;IPI00027434;IPI00647268;IPI00926710;IPI00643368;IPI00789934;IPI00644425;IPI00926881;IPI00926466	IPI00478231	2	1.8973e-05	133.89	0.92149	0.89041	0.95659	1.0197	0.90693	0.9161
TIVFVETK	0	935.533	IPI00017617;IPI00798375	IPI00017617	2	0.002085	102.61	1.1362	0.86019	0.816	0.70657	0.90717	1.496
SGEVIVNVK	0	943.534	IPI00012795	IPI00012795	2	0.0011349	113.62	0.90898	0.59225	0.65185	1.0521	0.90722	0.74448
ETVPTIAPK	0	954.539	IPI00790305;IPI00291608;IPI00796456;IPI00060650	IPI00790305	2	0.0039858	81.972	1.0382	0.82216	0.83393	0.86825	0.90744	1.1074
INCQVIGASVDSHFCHIAWVNTPK	0	2752.32	IPI00000874;IPI00640741	IPI00000874	3	3.1427e-150	196.76	0.89775	0.8223	0.897	0.55887	0.90745	1.1043
FNQCGTCNEFK	0	1403.56	IPI00002745	IPI00002745	2	0.00011855	130.1	1.027	0.82493	0.84266	0.86276	0.90763	1.115
ESEPQAAAEPAEAK	0	1426.66	IPI00299024;IPI00908521	IPI00299024	2	7.9283e-18	192.32	0.932	0.85372	0.88939	0.89919	0.90771	0.9559
ANIQIDQINTDINIERSHAQK	0	2420.24	IPI00019502;IPI00395772;IPI00742780	IPI00019502	3	7.1046e-13	140.02	0.98046	0.9911	0.93204	0.97962	0.90781	0.89553
IVINGNPITIFQERDPSK	0	2040.1	IPI00219018;IPI00795257;IPI00789134;IPI00788737;IPI00797221;IPI00795622;IPI00794605	IPI00219018	2,3	1.5473e-20	108.18	1.0339	1.1858	1.2106	0.89563	0.908	0.98463
VVIEAPDETTIK	0	1313.71	IPI00430803	IPI00430803	2	0.0023035	111.63	0.96446	0.94717	0.974	1.0166	0.90804	0.89463
GVNIPGAAVDIPAVSEK	0	1635.88	IPI00479186;IPI00941899;IPI00220644;IPI00910979;IPI00909560;IPI00847989;IPI00888126;IPI00604528	IPI00479186	2,3	4.782e-23	193.8	0.97244	0.92075	0.96242	0.91893	0.90806	0.97294
VIVVGNPANTNCITASK	0	1756.91	IPI00916111;IPI00915869;IPI00952583;IPI00916253	IPI00916111	2	1.2451e-109	322.17	0.90267	0.92745	1.0392	1.0646	0.90817	0.90756
SERSSSGIIEWESK	0	1593.76	IPI00848328;IPI00647473;IPI00940312;IPI00027834;IPI00465225	IPI00027834	2	1.598e-137	196.67	1.1476	0.69128	0.61349	0.77294	0.90831	1.1502
KYAPTEAQINAVDAIIDSMSIAK	1	2448.26	IPI00220834	IPI00220834	2	3.7573e-35	196.78	0.78123	0.8871	1.2166	1.0149	0.90832	0.99049
TVTIVVRGSNK	0	1172.69	IPI00302927;IPI00893358;IPI00921414	IPI00302927	2	0.0003484	118.9	0.86448	0.61092	0.68935	0.73073	0.90846	1.3269
SHVEDGDIAGAPASSPEAPPAEQDPVQIK	0	2911.38	IPI00856098;IPI00215743;IPI00220967;IPI00744135	IPI00856098	3	1.1211e-12	105.72	0.99617	0.75084	0.82804	0.81399	0.90857	1.127
GRPMVISSGMQSMDTMK	0	1854.85	IPI00147874	IPI00147874	2	0.00020063	108.18	0.92157	1.0037	0.9635	0.91552	0.90857	1.003
ISDGVAVIK	0	900.528	IPI00784154;IPI00917575	IPI00784154	2	1.5036e-05	129.38	0.9704	0.94668	0.89228	0.8742	0.90865	1.0471
GMGGAMDIVSSAK	0	1222.57	IPI00026516;IPI00964493;IPI00967390	IPI00026516	2	6.6351e-15	170.66	0.98557	0.87326	0.93059	0.91586	0.90865	1.098
ESYSIYVYK	0	1150.55	IPI00003935;IPI00152785;IPI00220403;IPI00515061;IPI00454695;IPI00746251	IPI00003935	1,2	0.0001343	129.47	1.0897	0.93803	0.85968	0.88569	0.9087	1.0708
STFVNIIK	0	920.533	IPI00965238;IPI00020454;IPI00966824	IPI00965238	2	0.00097804	114.5	1.2554	1.0127	0.78719	0.78839	0.90884	1.2115
IITEDVQGK	0	1001.54	IPI00419880;IPI00472119;IPI00967073;IPI00964983;IPI00966860;IPI00968146;IPI00965772;IPI00967388;IPI00963912;IPI00965481	IPI00419880	2	1.7074e-05	127.3	0.87657	0.91099	0.95872	1.038	0.90887	0.88093
EVPQDQHIEAPADQSK	0	1790.84	IPI00032881	IPI00032881	3	1.4167e-08	146.59	0.97739	0.92086	0.89275	1.0506	0.90891	0.88492
TIQIFNIEMK	0	1235.66	IPI00024067;IPI00455383;IPI00022881;IPI00300446	IPI00024067	2	0.00012415	136.96	1.0699	0.92206	0.84767	0.77901	0.90893	1.1804
IIGSIYAIGIPK	0	1243.75	IPI00329625;IPI00940204;IPI00477123;IPI00945791;IPI00946301	IPI00329625	2	4.2614e-05	129.84	1.0569	0.98311	0.87314	0.88762	0.90925	0.94506
VFQEAIRNIGGQIQEK	0	1828.98	IPI00072534;IPI00735181;IPI00909477	IPI00072534	2	1.855e-26	199.65	1.1212	1.0965	0.99703	1.0235	0.9093	0.95327
IKGEMMDIQHGSIFIQTPK	1	2172.11	IPI00219217;IPI00788938;IPI00789173	IPI00219217	3	3.0297e-20	183.74	0.9411	0.99601	1.0125	1.0709	0.90939	0.93189
FVARNYIEPGK	0	1292.69	IPI00219078;IPI00914019	IPI00219078	2	2.8735e-08	154.15	0.95714	0.88851	0.90684	0.96386	0.90941	1.0816
VHSFPTIK	0	927.518	IPI00010796;IPI00878551	IPI00010796	2	0.013723	71.692	0.93493	0.88176	0.99118	0.92936	0.9095	1.0671
AVECPPPRTTARIIDK	0	1822.97	IPI00307092;IPI00014238;IPI00445108	IPI00307092	3	0.10042	35.657	0.94142	0.95121	1.0289	0.95588	0.90959	0.86965
FIGDIEVWDQAEK	0	1548.75	IPI00329633;IPI00908949;IPI00910719	IPI00329633	2	4.6137e-15	175.21	0.97816	0.89149	0.96083	0.99259	0.90971	0.95137
DYGNSPIHRFK	0	1332.66	IPI00183626;IPI00334175;IPI00179964;IPI00413691	IPI00183626	2	0.013177	61.435	1.0397	0.90587	0.81892	0.88301	0.90974	1.0156
EASDPQPEEADGGIK	0	1541.68	IPI00005969	IPI00005969	2	1.7715e-23	203.27	0.9926	0.90126	0.93024	0.94665	0.90993	0.97032
AHVVPCFDASK	0	1229.59	IPI00333541;IPI00302592;IPI00644576;IPI00553169	IPI00333541	2	0.001709	89.548	1.0507	0.96772	0.93492	1.0284	0.90999	0.94193
VIVAQHDVYK	0	1170.64	IPI00010810;IPI00895865	IPI00010810	2	2.1704e-06	150.04	0.99443	1.0497	1.04	0.98273	0.91001	0.93398
TVQGSGHQEHINIHK	0	1683.84	IPI00029601;IPI00062884;IPI00746806;IPI00791680	IPI00029601	3	0.018933	56.569	0.93539	0.86872	0.88335	0.67754	0.91004	1.3815
VMTSGTGAPAK	0	1018.51	IPI00641743;IPI00019848;IPI00219326	IPI00641743	2	0.04494	67.08	1.0142	1.0099	0.87302	0.65832	0.91018	1.0701
VQEQIGNDVVEK	0	1356.69	IPI00006092	IPI00006092	2	0.0003276	112.42	0.9635	0.97018	1.0432	1.0816	0.91034	0.82613
AFTPFSGPK	0	950.486	IPI00257882;IPI00910514;IPI00909399	IPI00257882	2	0.0029273	85.731	1.033	0.82353	0.78544	0.9704	0.91039	1.0403
EYVTCHTCRSPDTIIQK	0	2106.98	IPI00021728;IPI00176637	IPI00021728	3	2.7908e-07	134.21	0.95279	0.92434	0.98294	0.93332	0.91042	0.96919
RFDVSGYPTIK	0	1281.67	IPI00009904;IPI00852792	IPI00009904	2	0.00075734	96.82	0.9062	0.79396	0.92659	0.87235	0.91044	1.0019
ISIVPVRRGYWGNK	0	1643.93	IPI00013485;IPI00165486;IPI00386445;IPI00871956;IPI00877829;IPI00878284	IPI00013485	2,3	0.0024915	78.324	0.95087	0.89468	0.92947	0.97995	0.91083	0.9476
ASGPPVSEIITK	0	1197.66	IPI00217465;IPI00217466;IPI00217467	IPI00217465	2	0.00032759	105.65	0.99504	0.90494	0.91143	0.91009	0.91101	0.99133
TVSPDRIEIEAAQK	0	1555.82	IPI00001639	IPI00001639	2	0.055466	47.037	1.0191	0.79732	0.83089	0.76299	0.9111	1.1672
IVNSAQTGSFK	0	1150.6	IPI00027448	IPI00027448	2	0.00043325	114.72	0.95592	0.96602	0.9955	0.90931	0.9111	1.0046
TIADIIRTCIGPK	0	1456.81	IPI00553185;IPI00290770;IPI00514032;IPI00513703;IPI00514218	IPI00553185	2	2.1165e-13	127.56	0.99942	0.73104	0.71688	0.8569	0.91133	1.0812
IHYCVSCAIHSK	0	1473.69	IPI00655650;IPI00477550;IPI00795435;IPI00479543;IPI00187140;IPI00787644	IPI00655650	2,3	1.9734e-13	174.42	0.94949	0.89496	0.94708	0.94173	0.91138	0.91268
EDVFVHQTAIKK	1	1413.76	IPI00643351;IPI00031812;IPI00450235;IPI00031801;IPI00219148;IPI00219147;IPI00555698	IPI00643351	2	1.6725e-13	186.58	1.002	0.89153	0.86954	0.97641	0.91152	1.0097
IIESRYHQIGSGK	0	1486.79	IPI00011274;IPI00845282;IPI00045498	IPI00011274	2	8.9785e-22	206.49	0.92515	0.95703	0.95096	0.99698	0.91154	0.94139
TATPQQAQEVHEK	0	1465.72	IPI00465028;IPI00797270;IPI00796633	IPI00465028	2,3	1.7853e-155	236.28	1.1377	0.867	0.85802	0.80142	0.91158	1.1645
IEVIEIMTDRGSGK	0	1546.8	IPI00215965;IPI00760620;IPI00465365;IPI00644968;IPI00797148;IPI00879501;IPI00797902;IPI00176692;IPI00742127	IPI00215965	2,3	8.3628e-55	251.68	1.0013	0.94166	0.94822	1.0476	0.91162	0.9426
KPEDWDEEMDGEWEPPVIQNPEYK	0	2959.29	IPI00020599	IPI00020599	3	2.3925e-09	114.02	0.91122	0.99759	1.0864	1.0618	0.91164	0.92317
RHITGEFEK	0	1115.57	IPI00792352;IPI00796462;IPI00795671;IPI00643041	IPI00792352	2	0.0010888	114.4	0.94846	0.85553	0.96794	0.90074	0.91169	1.0238
ADIARIAIIRK	0	1238.78	IPI00013297	IPI00013297	2,3	0.028374	54.259	1.0817	0.95716	0.81758	0.99281	0.9117	0.9752
MAINHPYFNDIDNQIK	0	1931.92	IPI00026689;IPI00955014;IPI00073536	IPI00026689	2	1.2859e-05	127.18	0.93568	0.97899	0.94776	0.9698	0.91171	1.0029
VAGQDGSVVQFK	0	1233.64	IPI00798011;IPI00909492;IPI00793687;IPI00299147;IPI00299149;IPI00434968;IPI00973977;IPI00790142;IPI00745893	IPI00798011	2	2.3335e-09	169.89	0.93403	0.97169	1.0193	1.071	0.91188	0.88464
ISVISVEDPPQRTAGVK	0	1794.98	IPI00004902;IPI00556451	IPI00004902	2,3	3.0551e-27	207.79	0.92723	0.88922	1.053	0.93746	0.91191	1.0339
GEGPEVDVNIPK	0	1252.63	IPI00021812;IPI00555610	IPI00021812	2	4.1848e-06	147.33	0.97235	0.85923	0.88138	0.9859	0.91191	1.0003
GDATVSYEDPPTAK	0	1449.66	IPI00009841;IPI00872855;IPI00879259;IPI00879242;IPI00065554;IPI00293254;IPI00953325;IPI00878484	IPI00009841	2	4.7175e-43	246.64	0.94707	0.87684	0.88215	0.95196	0.91196	0.94779
DTGDTRESSSIYISK	0	1657.78	IPI00031420;IPI00956601;IPI00964927	IPI00031420	2	0.00062782	98.676	1.0187	0.91705	1.0013	0.85656	0.91201	1.0442
IIQRSQAQQPQK	0	1423.79	IPI00867714;IPI00410324;IPI00749127;IPI00909229	IPI00867714	2	1.1167e-19	191.29	0.84184	0.75922	0.94258	0.9257	0.91238	0.79617
APPAPGPASGGSGEVDEIFDVK	0	2096.01	IPI00465132;IPI00399318;IPI00399319	IPI00465132	2	9.7178e-10	131.98	0.88524	0.91079	0.99292	1.0192	0.91246	0.91462
IKGEHPGISIGDVAK	1	1519.84	IPI00419258;IPI00645948;IPI00644653;IPI00018755;IPI00903004;IPI00742929;IPI00022796;IPI00879051	IPI00419258	2,3	2.3402e-14	174.59	0.953	0.84944	0.99525	0.96949	0.91252	0.92611
VTDDIVCIVYK	0	1323.67	IPI00642816	IPI00642816	2	0.0086561	66.56	1.0037	0.8504	0.91379	1.0349	0.9126	0.92797
QSFTMVADTPENIRIK	0	1848.94	IPI00000861;IPI00386803;IPI00952738;IPI00909481;IPI00883946;IPI00909939	IPI00000861	3	2.9346e-06	127.32	0.94918	1.0109	0.98404	0.83352	0.91261	1.0968
RANEFIEVGK	0	1161.61	IPI00029012	IPI00029012	2	0.00053541	106.49	0.99277	0.95842	0.95288	0.94535	0.91262	0.90607
IVFSNVNIK	0	1032.6	IPI00293464;IPI00909008;IPI00909251	IPI00293464	2	0.010724	72.607	0.97302	0.90381	0.97948	0.98378	0.91275	0.95276
RAPQMDWSK	0	1117.53	IPI00003527;IPI00794755	IPI00003527	2	0.040244	51.268	3.3734	2.6355	1.2079	0.99921	0.9128	0.97839
AESEEMETSQAGSK	0	1482.61	IPI00002966	IPI00002966	2	5.4232e-05	109.07	0.8742	0.90785	1.0001	0.84638	0.91283	0.81573
EQIVPKPEEEVAQK	0	1622.85	IPI00413324;IPI00644171;IPI00874214	IPI00413324	2,3	1.4461e-42	238.88	1.0412	0.9494	0.91559	0.90624	0.91285	1.0616
AVEIAANTK	0	915.503	IPI00643920;IPI00942979;IPI00792641;IPI00940673;IPI00793119;IPI00789310	IPI00643920	2	0.075013	37.556	1.0352	0.84212	0.79835	0.92649	0.91287	1.0426
AGEQQETASREIVK	0	1544.78	IPI00872028;IPI00292771;IPI00006196	IPI00872028	2,3	1.0057e-31	213.67	1.0297	1.062	1.026	0.9865	0.91292	0.87729
ERSGVSIAAIK	0	1129.65	IPI00217465;IPI00217466;IPI00217467	IPI00217465	2	0.00042155	107.06	0.98514	0.87947	0.9186	0.94987	0.91299	1.0422
YHPGYFGK	0	967.455	IPI00456758	IPI00456758	2	0.028885	58.981	1.0031	0.97266	0.9628	0.97167	0.91304	1.0605
IRQPFFQK	0	1062.6	IPI00301311;IPI00896523;IPI00844040;IPI00917753;IPI00887938;IPI00888355;IPI00072377	IPI00072377	2	1.2554e-05	137.18	0.9061	0.92664	0.997	0.94429	0.9131	0.98373
RVMGIVPAK	0	969.579	IPI00026781	IPI00026781	2	0.00092384	118.5	1.0015	0.95529	0.90847	0.96687	0.91324	1.0885
QIAEIAISK	0	971.565	IPI00220219;IPI00789674	IPI00220219	2	0.042603	50.194	1.107	0.93082	0.93783	1.0828	0.9135	0.955
VIEEANQAINPK	0	1324.7	IPI00940000;IPI00889541;IPI00651653;IPI00651677;IPI00947363;IPI00952778	IPI00940000	2,3	5.6309e-05	119.69	0.98675	0.90037	0.91945	1.0483	0.91351	0.89195
VQVSVIK	0	771.485	IPI00020632;IPI00909521;IPI00514341	IPI00020632	1,2	0.00070282	109.01	0.95767	0.91275	0.99035	1.0352	0.91392	0.99056
KGDECEIIGHSK	1	1371.65	IPI00027107	IPI00027107	3	0.00045951	113.99	0.95579	0.82799	0.9049	0.91066	0.91394	1.0047
ERIESINIQREK	0	1513.82	IPI00029012	IPI00029012	2	0.00071015	95.094	1.0682	0.84798	0.89628	0.90055	0.91395	1.0376
MVHFITHYADK	0	1360.66	IPI00024642;IPI00743775	IPI00024642	2	0.0024303	84.687	0.97917	0.96184	0.96655	0.90493	0.91426	0.9869
IGVIEDHSNRTRIAK	0	1707.94	IPI00027230;IPI00939289	IPI00027230	3	0.011182	64.65	0.87611	0.93272	0.98379	0.95936	0.91434	0.9487
MQIIEIITTEK	0	1317.72	IPI00031522	IPI00031522	2	0.00026606	122.42	1.2174	1.0176	0.93154	0.99858	0.91457	0.98501
APSVPAAEPEYPK	0	1354.68	IPI00215901;IPI00218988;IPI00922165;IPI00172460	IPI00215901	2,3	1.3357e-06	148.62	1.0096	0.92856	0.97026	0.9463	0.9146	1.0054
IAQQQAAIIMQQEERAK	0	1955.03	IPI00221106;IPI00477803	IPI00221106	3	1.0801e-06	133.47	0.94545	1.0268	1.1608	0.98779	0.91461	0.89762
GPSSVEDIK	0	930.466	IPI00549248;IPI00220740;IPI00658013	IPI00549248	2	1.6724e-12	175.91	0.89579	0.88954	0.99659	0.97068	0.91495	0.97274
GHVDIIAPTVQEIAAIEK	0	1903.04	IPI00293655	IPI00293655	2	7.2627e-10	148.06	0.9541	0.98168	1.0557	1.0111	0.91497	0.91777
EPQPEVAAAEEEK	0	1425.66	IPI00006666	IPI00006666	2	7.1785e-05	127.18	0.89127	0.98933	1.1117	0.983	0.91499	0.91361
KVVNPIFEK	1	1072.63	IPI00299573;IPI00478896	IPI00299573	2	0.0018103	112.75	1.0441	1.0234	0.94993	0.88523	0.91526	1.152
GSSASIVIK	0	860.497	IPI00215777;IPI00790115;IPI00022202;IPI00788624;IPI00791315	IPI00215777	2	0.00026308	118.18	0.95726	0.93529	0.91496	0.7878	0.9153	1.1398
IEQIFQDEVAK	0	1318.68	IPI00014898;IPI00186711;IPI00398002;IPI00398778;IPI00398777;IPI00398779;IPI00398775;IPI00420096;IPI00398776	IPI00014898	2	2.7841e-05	134.98	1.0273	0.91949	1.0427	0.97411	0.9153	0.97324
CIIVEEGK	0	946.479	IPI00473014;IPI00845388;IPI00888288;IPI00786968;IPI00788232	IPI00473014	2	0.00044883	114.89	1.0978	0.94305	0.78939	0.77608	0.91535	1.2084
VFWREMVECFNK	0	1643.76	IPI00011416;IPI00908564;IPI00848328	IPI00848328	2	4.2536e-08	153.75	0.90625	0.92869	1.0391	1.0112	0.91543	0.90648
VTITSEEEARIK	0	1374.74	IPI00947127;IPI00217966;IPI00607708;IPI00939286;IPI00908791;IPI00910754	IPI00947127	2,3	3.6808e-27	212.9	0.96946	0.9448	0.94439	0.98385	0.91546	0.94094
GVARISAEAEK	0	1129.61	IPI00014898;IPI00186711;IPI00398002;IPI00398778;IPI00398777;IPI00398779;IPI00398775;IPI00420096;IPI00398776	IPI00014898	2	8.5481e-13	172.8	0.99527	0.95227	0.91433	0.92805	0.91549	1.0494
EAFQIFDRTGDGK	0	1482.71	IPI00796366;IPI00335168;IPI00789605;IPI00930599;IPI00101961	IPI00796366	2	4.2544e-05	127.79	1.0213	0.79746	0.84224	0.94021	0.91553	0.93614
ADDGRPFPQVIK	0	1341.7	IPI00796333;IPI00465439	IPI00796333	2,3	1.0319e-05	125.97	0.95581	0.85072	0.87904	0.90973	0.9156	1.0193
ICAVGITK	0	860.479	IPI00022744;IPI00219994;IPI00910737;IPI00910298	IPI00022744	2	0.0022954	95.909	0.94193	0.99146	0.91365	0.9837	0.9156	0.98864
GMIARGSYSIK	0	1181.62	IPI00794402;IPI00003815;IPI00793767;IPI00791180	IPI00794402	2	1.5533e-05	135.86	0.87117	1.0602	1.1851	0.86033	0.91564	1.0748
TVPVEAVTSK	0	1029.57	IPI00029601;IPI00062884;IPI00746806;IPI00792087	IPI00029601	2	0.014348	63.283	1.0438	0.79519	0.80813	0.70718	0.91567	1.2302
AVDIPHMDIEAIK	0	1450.75	IPI00412579;IPI00035167	IPI00412579	2,3	2.3664e-11	164.68	1.001	0.90597	0.91007	0.91606	0.91571	0.96981
VVVAENFDEIVNNENK	0	1831.9	IPI00025252;IPI00847663	IPI00025252	2,3	5.8711e-27	207.92	0.9742	0.92568	0.93876	1.0871	0.91611	0.86351
AVEIVTSTSAAK	0	1175.64	IPI00470596;IPI00607784;IPI00178953	IPI00470596	2	3.6513e-08	120.53	1.0497	1.0011	0.93556	0.97469	0.91623	0.95094
IIPVYINCVIK	0	1330.77	IPI00024661	IPI00024661	2	2.3445e-05	137.95	0.88694	0.8923	1.1157	0.9929	0.91628	0.90228
SITQVRAMMYSGEIK	0	1712.86	IPI00291510;IPI00925196	IPI00291510	2	4.2962e-15	173.03	1.1382	0.84775	0.73264	0.75862	0.9163	1.1327
ISDIIAPISEQIK	0	1425.81	IPI00008274;IPI00639931;IPI00646869;IPI00645789;IPI00644589;IPI00641881;IPI00647351;IPI00644109;IPI00646269;IPI00642414	IPI00008274	2	5.4231e-05	112.42	1.0256	0.92119	0.95375	0.94442	0.91634	1.0127
IIITEPPMNPTK	0	1352.74	IPI00470573;IPI00005159;IPI00909247	IPI00470573	2	0.00050825	101.71	0.93833	0.87589	1.0102	1.0558	0.91646	0.88809
ICWFIDEAAARIITVPFEK	0	2278.18	IPI00029997	IPI00029997	3	0.0064697	66.335	0.94884	0.91451	0.98902	0.98361	0.91647	0.96504
ESVDGQWVCISDVNK	0	1734.79	IPI00853598;IPI00375370;IPI00479141;IPI00789755;IPI00789169	IPI00853598	2	8.3348e-65	144.73	0.98456	0.99332	1.0585	0.99283	0.91664	0.91652
IFVGGIKEDTEEHHIRDYFEEYGK	1	2910.38	IPI00396378;IPI00916517;IPI00414696	IPI00396378	3	1.572e-22	176.11	0.93763	0.90025	1.0586	0.97014	0.91674	0.93965
AEDEVQRERVSAK	0	1515.76	IPI00304925;IPI00845339;IPI00909073;IPI00911039	IPI00304925	2,3	1.4833e-21	187.11	0.95275	0.95767	0.88211	1.0119	0.91676	0.95379
DIFDPIIEDRHGGYKPSDEHK	0	2467.18	IPI00022977;IPI00908811	IPI00022977	3	2.0435e-05	94.882	0.97036	1.046	1.1404	0.96519	0.91683	0.92586
DSAQNSVIIVDK	0	1287.67	IPI00022462;IPI00924935	IPI00022462	2	5.1629e-28	217.91	0.98845	0.9084	0.84288	0.8448	0.91689	1.0336
QTYSTEPNNIK	0	1293.62	IPI00914529;IPI00910727;IPI00182533;IPI00816097;IPI00914543	IPI00914529	2	0.0012166	92.866	0.95752	0.84296	0.90074	0.91832	0.91698	1.0182
SSGPTSIFAVTVAPPGARQGQQQAGGDGK	0	2768.38	IPI00479217;IPI00644224	IPI00479217	3	1.7598e-22	151.3	1.0593	0.75512	0.69427	1.0393	0.91708	1.2029
DIEEDHACIPIK	0	1438.68	IPI00186290;IPI00909570	IPI00186290	2	1.4605e-19	186.74	0.99559	0.96076	0.92551	0.93386	0.91723	0.98861
SIQDIIAIIGMDEISEEDK	0	2118.04	IPI00303476;IPI00792534	IPI00303476	2	5.5118e-40	213.15	1.0871	0.92986	0.91215	0.90429	0.9173	1.0936
GQVINIQMRRTIHK	0	1692.96	IPI00009032;IPI00916802;IPI00916922;IPI00917386	IPI00009032	3	0.0018034	84.479	0.94387	0.94205	0.96871	0.89856	0.91734	1.129
KWDISEIPK	1	1114.6	IPI00940000;IPI00889541;IPI00651653;IPI00651677;IPI00947363;IPI00952778;IPI00879638	IPI00940000	2	0.010793	76.465	1.0756	0.91947	0.87936	0.90473	0.91734	1.0116
NIETPICK	0	973.49	IPI00215901;IPI00218988;IPI00922165;IPI00172460;IPI00921960;IPI00218989	IPI00215901	2	0.023572	64.297	0.96844	0.94071	0.83333	0.85749	0.91736	1.0401
IISSDGHEFIVK	0	1343.71	IPI00300341;IPI00796346;IPI00791185;IPI00973924;IPI00789454	IPI00300341	2	8.9461e-09	153.34	0.9797	0.9156	0.92363	0.94566	0.91741	0.96396
AVAARAAGSTVRQRK	0	1540.89	IPI00220835	IPI00220835	3	0.0010805	92.19	0.99559	0.92311	0.99857	0.96661	0.91742	0.98593
VVPTTDHIDTEK	0	1353.68	IPI00745568;IPI00641815	IPI00745568	2	4.2485e-05	132.32	1.0543	1.0998	0.91115	0.99422	0.91759	0.97717
TIIARAVASQIDCNFIK	0	1919.03	IPI00926977;IPI00021926;IPI00910829	IPI00926977	2	9.7207e-06	124.29	1.0925	0.86859	0.79368	0.83901	0.91762	1.117
AHEIIPNIVCCSAK	0	1610.79	IPI00784090;IPI00302925;IPI00797206	IPI00784090	2	1.1667e-06	136.51	0.92873	0.87336	0.89962	0.92798	0.91783	0.96441
AAYEAEIGDARK	0	1292.64	IPI00216952;IPI00021405;IPI00216953;IPI00644087;IPI00655812;IPI00514204	IPI00216952	2,3	1.6381e-94	184.24	0.96588	0.91959	0.93161	0.96768	0.91829	0.99403
IMVAIAK	0	744.457	IPI00418169;IPI00455315;IPI00334627;IPI00797556;IPI00903334	IPI00418169	1,2	2.2094e-05	132.72	1.1124	1.0822	1.0178	0.9479	0.91843	0.97755
IQVRIVREIEK	0	1381.84	IPI00013415;IPI00893703;IPI00478287;IPI00798077;IPI00796554	IPI00013415	2,3	0.00077013	99.752	0.95583	0.9128	0.94491	0.98573	0.91884	0.92352
VAAGTIDASTK	0	1032.55	IPI00299507;IPI00925237;IPI00927291;IPI00924630	IPI00299507	2	0.00043068	114.86	1.0088	0.88803	0.911	1.0431	0.91892	0.87818
YFSERGDAVTK	0	1271.61	IPI00748256;IPI00479722	IPI00748256	2	5.332e-09	163.12	1.0558	0.94635	0.89719	0.87237	0.91905	0.99819
QGGIGPMNIPIVSDPK	0	1621.85	IPI00000874;IPI00640741	IPI00000874	2	1.85e-26	199.68	1.0249	1.047	0.94998	1.0321	0.91906	0.98962
ASITAIEAK	0	902.507	IPI00019502;IPI00395772;IPI00742780	IPI00019502	2	2.794e-12	169.41	1.0292	0.9447	0.90733	0.86313	0.91911	1.0359
GWDQGIIGMCEGEK	0	1578.68	IPI00002535	IPI00002535	2	0.00011584	114.63	0.9082	0.97024	1.0038	0.96418	0.91933	0.93973
ENFSCITRIDHNRAK	0	1859.91	IPI00916111;IPI00915869;IPI00952583;IPI00916253	IPI00916111	3	0.070403	42.785	0.93536	0.91829	0.95343	0.81934	0.91956	1.1051
VEIAGPGFINVHIRK	0	1648.94	IPI00004860;IPI00759723	IPI00004860	3	0.00059874	99.531	0.88647	0.96662	1.1173	1.0104	0.91956	0.93613
VAHSFNCTPIEGMISHQIK	0	2168.05	IPI00299000;IPI00794875;IPI00807557;IPI00790307	IPI00299000	3	2.1149e-30	202.18	0.93529	1.0155	1.0944	1.0283	0.91978	0.93942
SVSTPSEAGSQDSGDGAVGSRRGPIK	0	2501.21	IPI00915993;IPI00216348;IPI00827813;IPI00917978;IPI00917325;IPI00915884;IPI00917785;IPI00917075	IPI00915993	3	8.2114e-09	103.4	1.0673	0.93736	0.79498	0.81069	0.91986	1.1288
KREAEEVYRNSMPASSFQQQK	1	2512.21	IPI00006932;IPI00216804	IPI00006932	3	8.9717e-13	142.39	0.90878	1.0385	1.1724	1.0851	0.91994	0.85655
EEIERQAVDQIK	0	1456.75	IPI00843975;IPI00872684	IPI00843975	2	5.114e-14	187.85	1.0106	0.95395	0.89889	0.98958	0.92014	0.95973
FSAPRHGSIGFIPRK	0	1668.92	IPI00550021;IPI00651660;IPI00877999;IPI00878524;IPI00878827	IPI00550021	2,3	7.8477e-11	162.48	1.0138	0.91106	0.91855	0.85756	0.92017	1.1325
FEDRSPAAECISEK	0	1637.74	IPI00030275;IPI00646055	IPI00030275	2	3.3028e-16	184.99	0.96901	0.97366	0.94255	0.89806	0.92017	1.0255
YEDICPSTHNMDVPNIK	0	2031.9	IPI00376005;IPI00411704;IPI00006935;IPI00946642;IPI00946502;IPI00945644;IPI00855924	IPI00376005	2,3	2.0096e-47	243.83	0.92907	1.0542	0.95182	0.98198	0.92021	1.0282
QVEIAQREGAK	0	1227.66	IPI00020632;IPI00640430;IPI00642128	IPI00020632	2,3	1.9602e-27	228.83	0.9572	0.93509	0.96184	0.94208	0.92029	1.0646
GSGTAEVEIKK	1	1117.6	IPI00479186;IPI00941899;IPI00220644;IPI00910979;IPI00909560;IPI00888126	IPI00479186	2,3	4.935e-27	224.66	1.0057	0.84628	0.9031	0.80059	0.92035	1.2106
YEWDVAEARK	0	1265.6	IPI00186290;IPI00909570;IPI00440662	IPI00186290	2,3	5.235e-06	152.54	1.4032	0.82459	0.57	0.90151	0.92046	1.003
SIDIPIQSSICRQIGQDIINSYIENEGK	0	3189.6	IPI00964409	IPI00964409	3	1.6128e-109	170.18	0.91988	0.71821	0.71847	0.78007	0.92067	1.1657
IEAFRASISK	0	1120.62	IPI00169383;IPI00916818;IPI00219568	IPI00169383	2	4.7207e-08	151.79	1.0075	0.87777	0.88304	0.98475	0.92068	1.0085
DQIIIGPTYATPK	0	1415.77	IPI00022793;IPI00893108	IPI00022793	2	4.224e-30	210.38	0.89987	0.94201	1.0704	0.92929	0.9207	1.0076
IQIINNMIDK	0	1200.65	IPI00169383;IPI00916818;IPI00909158;IPI00910974	IPI00169383	2	0.00046703	123.51	0.98995	1.0007	0.98166	1.0701	0.92076	0.88417
VNNASIIGIGYTQTIRPGVK	0	2100.17	IPI00294779;IPI00031804	IPI00294779	3	0.031351	53.255	0.97085	1.0446	0.97792	1.1164	0.92076	0.79973
TAENFRAISTGEK	0	1422.71	IPI00419585;IPI00910407;IPI00030144;IPI00455871;IPI00657716;IPI00743690;IPI00937169;IPI00925747;IPI00925411	IPI00419585	2,3	2.3213e-10	160.48	1.0535	0.8891	0.81971	0.85115	0.92078	1.0933
YNIMIVRINSK	0	1349.75	IPI00784090;IPI00302925;IPI00797206	IPI00784090	2	2.4917e-05	136.96	1.0297	0.8755	0.87353	0.90053	0.9208	0.99151
AQIFAITGVQPARQK	0	1626.92	IPI00872664;IPI00219913;IPI00640357	IPI00872664	2	3.9628e-32	216.15	0.88144	0.80824	0.90485	0.86304	0.92089	1.0555
MDSTEPPYSQKRYEEIVK	1	2199.05	IPI00396485;IPI00472724;IPI00180730	IPI00396485	2,3	1.7138e-77	169.02	0.90349	1.0592	1.0429	1.0375	0.92092	0.7585
VAPAQPSEEGPGRK	0	1421.73	IPI00012079;IPI00942600;IPI00908588;IPI00798302;IPI00910983	IPI00012079	2,3	2.1771e-10	159.5	0.92734	0.93137	0.97811	0.9886	0.921	0.94345
IFGNMEGDCPSDWK	0	1654.68	IPI00022462;IPI00924935	IPI00022462	2	5.75e-16	183.81	0.96307	0.92239	0.9811	0.97546	0.92117	0.97787
AVADAIRTSIGPK	0	1297.74	IPI00302927;IPI00921414	IPI00302927	2	3.4901e-30	213.18	0.86783	0.81826	0.97902	0.96847	0.92119	0.97914
EIVSDANQHVK	0	1238.63	IPI00554737;IPI00908543;IPI00910732;IPI00168184;IPI00798040	IPI00554737	2	0.0078849	70.488	1.0563	0.9018	0.85942	0.95693	0.9213	0.92849
AVVVCPKDEDYK	1	1421.69	IPI00479217;IPI00644224;IPI00883857;IPI00644079	IPI00883857	2,3	0.00041364	120.87	1.0134	0.89485	0.91862	0.97484	0.92149	1.0307
IRTFYEK	0	955.513	IPI00021840;IPI00640929	IPI00021840	2	0.010573	79.469	1.0139	0.87947	0.8583	0.9382	0.92156	1.0067
ENIIEEFSK	0	1107.54	IPI00012074;IPI00941649;IPI00644055;IPI00856038;IPI00910614;IPI00856037	IPI00012074	2	0.00051646	110.08	1.0813	0.93534	0.88557	0.92398	0.92163	1.0994
IQIVEMPIAHK	0	1277.72	IPI00032140;IPI00910487	IPI00032140	2,3	2.2451e-05	138.63	1.0812	1.0122	0.95356	0.998	0.9217	0.95652
TGVAVNKPAEFTVDAK	0	1645.87	IPI00333541;IPI00302592;IPI00644576;IPI00553169	IPI00333541	2	9.0664e-19	178.14	1.2654	0.89668	0.68761	0.71013	0.92172	1.3585
MFIGGISWDTSK	0	1340.64	IPI00011274;IPI00845282;IPI00045498	IPI00011274	2	6.4258e-06	133.05	1.0252	0.86855	0.84537	0.97886	0.92181	1.0278
QFTPCQIIADHANSPNK	0	1939.92	IPI00031522	IPI00031522	3	0.0054527	71.354	0.94987	0.96143	0.98732	0.7881	0.92194	1.1033
KIGEMWNNINDSEK	1	1676.78	IPI00376756;IPI00217477;IPI00640781;IPI00643317;IPI00411540;IPI00888596;IPI00374293	IPI00376756	2	1.4194e-09	149.22	0.96509	0.94565	0.97223	0.98481	0.92196	0.9723
GRFAVHRITPEEAK	0	1609.87	IPI00217030;IPI00646114	IPI00217030	2,3	7.7256e-16	180.84	1.0683	0.81591	0.78441	0.80223	0.92199	1.1953
AQFERDIQGRDEQSEEK	0	2063.95	IPI00019502;IPI00395772;IPI00742780	IPI00019502	3	4.5353e-19	178.23	1.0154	0.97521	1.0311	0.98699	0.92212	0.92165
ITPEEEEIINKK	1	1441.77	IPI00216587;IPI00645201	IPI00216587	3	0.013254	69.979	1.054	0.93768	1.0006	0.98505	0.92219	0.98771
DIEAHIDSANK	0	1211.58	IPI00019502;IPI00395772;IPI00742780	IPI00019502	2	0.046499	45.653	0.95904	0.89869	0.90005	0.95031	0.92235	0.9339
AIAAGGYDVEK	0	1092.55	IPI00217468	IPI00217468	2	0.00027435	122.51	0.9584	0.94178	0.9491	0.9991	0.92236	1.0239
VTQDATPGSAIDK	0	1301.65	IPI00008475	IPI00008475	2	9.0671e-81	177.38	0.96092	0.88104	0.88944	0.93196	0.92258	1.0326
KIEEVVQIIGDK	1	1369.78	IPI00018783	IPI00018783	2	4.5975e-05	129.77	1.0379	0.84219	0.95684	1.031	0.92269	1.0052
SGYISSERIIPQRVMDQHK	0	2243.15	IPI00843975;IPI00872684	IPI00843975	3	0.0010095	77.562	1.0454	0.87041	0.79404	0.77192	0.92282	1.1122
RAIDVIQAGK	0	1069.62	IPI00003438	IPI00003438	2	0.0014436	96.229	0.93078	0.97248	1.0118	1.01	0.92301	1.0607
VSGAQEMVSSAK	0	1192.58	IPI00303882;IPI00943550;IPI00106668	IPI00303882	2	1.7807e-12	166.62	0.94103	0.91741	0.92322	1.0133	0.92302	0.94653
IADRIGIEIGK	0	1183.69	IPI00219616;IPI00218371;IPI00643000;IPI00917032	IPI00219616	2	0.00049111	111.52	1.018	0.94121	0.89074	1.002	0.92306	0.89172
QMERAMIENEK	0	1377.64	IPI00219365;IPI00922115	IPI00219365	2	1.0901e-26	218.62	0.9971	0.91888	0.91722	0.92999	0.92323	1.0538
GISEDTTEETIK	0	1321.62	IPI00604620;IPI00444262;IPI00183526;IPI00916188	IPI00604620	2	1.6861e-13	176.05	0.96565	0.89766	0.95739	0.99703	0.92338	0.97445
QIPRIIGPGINK	0	1304.79	IPI00412579;IPI00478277	IPI00412579	2	1.1388e-08	157.38	0.96529	0.95788	0.93104	0.89844	0.92345	0.97703
EAKPDEIMDSK	0	1261.59	IPI00374657;IPI00170692;IPI00640416	IPI00374657	2	0.0074017	71.176	1.0683	0.87758	0.92558	0.88229	0.92362	1.0782
TGAPCRSERIAK	0	1344.69	IPI00465248;IPI00759806;IPI00216171;IPI00791564;IPI00792715;IPI00218474;IPI00909949;IPI00942494	IPI00465248	2,3	0.0009506	93.345	1.1005	0.85595	0.78254	0.64442	0.92425	1.3671
KIVIVGDGACGK	1	1215.66	IPI00478231;IPI00927114;IPI00552834;IPI00027434;IPI00647268;IPI00926710;IPI00643368;IPI00789934;IPI00644425;IPI00926881;IPI00926466	IPI00478231	2	0.013587	69.716	0.99683	0.84841	0.88117	0.9694	0.92472	1.007
QIQERAGVK	0	1027.58	IPI00479786;IPI00855957;IPI00909344;IPI00641948;IPI00644386;IPI00853059;IPI00974019;IPI00375441	IPI00641948	2	1.192e-21	226.09	1.0087	0.88656	0.8767	0.96471	0.9249	1.1152
TSDIIVIGIPWK	0	1340.77	IPI00025815;IPI00971018;IPI00639819	IPI00025815	2	1.2999e-08	155.15	1.0562	0.9432	0.77557	0.74274	0.92502	1.2312
GEGPDVDVSIPK	0	1211.6	IPI00021812;IPI00555610	IPI00021812	2	1.1305e-51	165.58	1.0955	0.80386	0.73685	0.93097	0.92506	0.93881
KGEIFEIK	1	962.544	IPI00328257;IPI00413947;IPI00940292;IPI00384489;IPI00946351;IPI00784366;IPI00784156;IPI00909735	IPI00784366	2	0.048033	56.916	1.0943	0.91449	0.90723	0.81514	0.92514	1.1271
DCEVVMMIGIPGAGK	0	1575.75	IPI00479217;IPI00644224;IPI00883857;IPI00644079	IPI00883857	2	8.1297e-05	113.35	1.0285	0.89061	0.90177	0.8914	0.92525	1.07
IIEARIK	0	841.539	IPI00025019;IPI00556291	IPI00025019	2	0.011774	80.229	0.99831	0.76159	0.88873	0.89601	0.92537	0.93831
YSQFINFPIYVWSSK	0	1877.94	IPI00027230	IPI00027230	2	2.4235e-06	126.63	1.0357	1.0091	0.94133	0.91902	0.92545	1.0512
KPAIVSIPEDVVQAEAGGMHTVCISK	0	2735.4	IPI00001661;IPI00787306;IPI00747309;IPI00925791;IPI00926548;IPI00925317;IPI00927389	IPI00001661	3	3.5688e-32	187.16	0.92393	1.0159	1.1737	1.0233	0.92546	0.93001
EVPAVPETIKK	1	1209.7	IPI00871827;IPI00472171;IPI00030179	IPI00871827	2	0.00031825	116.55	0.9779	0.89333	0.93009	0.85602	0.9255	1.0951
RVIIAAHGNSIRGIVK	0	1703.03	IPI00453476;IPI00549725;IPI00218570;IPI00844133	IPI00453476	3	5.111e-10	151.74	0.98298	0.87829	1.0336	0.97241	0.92555	1.0061
ADIINNIGTIAK	0	1241.7	IPI00414676;IPI00455599;IPI00411633;IPI00382470;IPI00784295;IPI00910046;IPI00031523	IPI00382470	2	6.4879e-63	276.41	1.0076	0.89415	0.8961	0.9319	0.92557	1.0287
AIQSVGQIVGEVIK	0	1439.83	IPI00926977;IPI00021926	IPI00926977	2	2.1355e-42	233.4	1.0026	0.98378	0.98026	1.0095	0.92568	0.9514
AEAGPEGVAPAPEGEK	0	1507.72	IPI00000877;IPI00922838	IPI00000877	2	9.7607e-19	177.04	0.99446	0.87159	0.89699	1.0292	0.92573	0.89075
ATSRGCITIIGGGDTATCCAK	0	2169	IPI00169383;IPI00916818;IPI00909158;IPI00910974	IPI00169383	2,3	0	245.78	0.94986	0.93502	1.0442	0.88874	0.92574	1.0888
VCMVYDIYK	0	1189.55	IPI00289499;IPI00925601	IPI00289499	2	0.052308	46.158	1.0362	0.92038	0.89174	1.0626	0.92576	0.91521
ATAVVDGAFK	0	977.518	IPI00027350;IPI00909207;IPI00794777;IPI00375401	IPI00027350	2	9.6353e-05	121.9	0.93012	0.82009	0.791	0.97254	0.92577	1.0004
EWFIQAAK	0	991.513	IPI00910781;IPI00027497;IPI00908881	IPI00910781	2	3.646e-08	171.73	1.0098	0.9263	0.93748	0.96122	0.92578	0.98812
ATAVMPDGQFK	0	1163.56	IPI00000874;IPI00640741	IPI00000874	2	1.5852e-08	159.09	0.9297	0.90854	0.97066	0.92391	0.92582	1.0117
IYHPNIDEK	0	1127.56	IPI00909773;IPI00021347;IPI00909975	IPI00909773	2	0.00068038	113.62	0.98085	0.84837	0.83372	0.75041	0.92583	1.1848
VIEEQIEPAVEK	0	1382.73	IPI00783271	IPI00783271	2	1.1107e-08	150.49	0.97445	0.86247	0.93857	1.0258	0.92587	0.93922
AIYEHITAK	0	1044.56	IPI00783271	IPI00783271	2	3.325e-12	166.33	1.0082	0.87114	0.82463	0.96453	0.92617	1.0055
GSGTAEVEIK	0	989.503	IPI00479186;IPI00941899;IPI00220644;IPI00910979;IPI00909560;IPI00888126	IPI00479186	2	0.021072	58.274	0.96357	0.78119	0.80242	0.91416	0.92618	1.0507
GTWVQIK	0	830.465	IPI00247583;IPI00879165;IPI00399374	IPI00247583	2	4.2601e-27	139.31	0.97691	0.89851	0.90628	0.83948	0.9262	1.1178
EAQRIAESNHIK	0	1394.73	IPI00013808;IPI00969112;IPI00845465;IPI00942539	IPI00013808	2,3	3.7677e-09	160.18	0.93516	0.88411	1.0247	0.97605	0.9262	0.888
NIYVIQEIDNPGAK	0	1572.81	IPI00644712;IPI00893062;IPI00893179	IPI00644712	2	8.1574e-15	170.11	1.0655	0.90334	0.97924	0.84606	0.92627	1.1466
TTPYQIACGISQGIADNTVIAK	0	2320.17	IPI00329633;IPI00967989	IPI00329633	2,3	9.3435e-32	186.92	1.1017	0.8859	0.80284	0.85414	0.9264	1.0592
IAAAIIGGVDQIHIKPGAK	0	1871.1	IPI00025039	IPI00025039	3	5.2393e-12	152	0.95558	0.98777	1.0581	0.99953	0.9264	0.94039
HITDAYFK	0	993.492	IPI00790342;IPI00329389;IPI00867533	IPI00790342	2	0.0011322	112.84	1.0251	0.83349	0.87695	0.96646	0.92657	1.2411
RTDRSIICCIRK	0	1576.83	IPI00789101;IPI00789698;IPI00015029;IPI00908647;IPI00790462	IPI00789101	3	0.027653	54.471	0.99036	0.88516	0.89858	0.78002	0.92662	1.0776
GISAGAVQTAGK	0	1058.57	IPI00294891;IPI00654555;IPI00797590	IPI00294891	2	2.1908e-13	173.19	1.0685	0.91584	0.84025	0.83666	0.92674	1.1014
GVCRAQTMSNSGIK	0	1507.72	IPI00793201;IPI00006252;IPI00910647	IPI00793201	2	3.3221e-32	225.32	0.93539	0.83468	1.0204	0.88429	0.92678	1.0489
IIAAAITECHRK	0	1381.75	IPI00294879	IPI00294879	2,3	1.7303e-19	198.81	0.96226	0.96242	1.0448	0.99473	0.92678	0.96442
IGGSAVISIEGKPI	0	1339.77	IPI00012011	IPI00012011	2	1.2296e-06	135.58	0.99734	0.96023	0.94466	0.98921	0.92681	0.92634
FIRIMGAGK	0	991.564	IPI00003419	IPI00003419	2	3.871e-08	147.19	1.1738	0.93945	0.93203	0.91441	0.92694	1.1089
AIEIDSNIYRIGQSK	0	1705.9	IPI00019502;IPI00395772	IPI00019502	2	4.9655e-16	176.23	0.97686	0.92265	0.94058	0.98302	0.92708	0.92136
VICEIADIQDK	0	1302.65	IPI00290566	IPI00290566	2	7.0644e-05	124.12	1.0117	1.0113	1.0395	1.0795	0.92767	0.87345
IPDPEAVKPDDWDEDAPAK	0	2106.97	IPI00020984;IPI00941747;IPI00442866;IPI00966898	IPI00020984	2,3	3.953e-15	160.47	0.99874	1.064	1.1055	1.0489	0.92774	0.96765
EEASGSSVTAEEAK	0	1393.62	IPI00220834	IPI00220834	2	8.4353e-199	244.44	0.91953	0.76007	0.791	0.90686	0.92785	0.97964
EFPGIAGVK	0	916.502	IPI00171438;IPI00939560	IPI00171438	1,2	0.026208	82.452	1.0128	0.96245	0.94848	0.95637	0.92785	0.94897
VIPTYDASK	0	992.518	IPI00900293;IPI00289334;IPI00477536;IPI00943563;IPI00382697;IPI00953109;IPI00940093;IPI00945610;IPI00382698;IPI00382699;IPI00798140	IPI00900293	2	0.027826	56.916	0.99873	0.91936	0.73971	1.1003	0.92789	0.9018
ARIAEQAERYDDMAAAMK	0	2038.96	IPI00220642;IPI00910779	IPI00220642	2,3	0	276.12	0.99293	1.0367	1.1146	0.89346	0.92793	1.0477
IFTAESIIGIK	0	1190.69	IPI00298520;IPI00514053;IPI00915422	IPI00298520	2	1.3326e-06	143.97	1.0347	0.92835	0.93175	0.93968	0.92818	1.0287
KIVESIPQEIK	1	1282.75	IPI00005537	IPI00005537	2	0.005003	78.964	0.96949	0.93635	1.0185	0.98053	0.92849	1.0009
ERDARTIIAK	0	1171.67	IPI00604620;IPI00444262	IPI00604620	2	0.0023386	85.29	0.96531	0.82395	0.90231	0.95846	0.92852	0.92984
EHRIDGRVIDPK	0	1433.77	IPI00334587;IPI00742926;IPI00964992;IPI00334713;IPI00966854;IPI00964686;IPI00329355;IPI00106509	IPI00334587	2	0.0014375	89.805	1.0062	1.0066	0.91443	0.98443	0.92854	0.94872
YFSERGDAVAK	0	1241.6	IPI00943181;IPI00384051;IPI00746205	IPI00943181	2	9.1944e-13	170.89	1.0658	0.89116	0.87623	0.88836	0.92859	1.103
AFAMTNQIIVEK	0	1363.72	IPI00889534;IPI00011062;IPI00397498	IPI00889534	2	1.2673e-19	189.3	0.9254	0.89493	1.0076	0.95379	0.92862	0.98777
IVEAICAEHQINIIK	0	1749.94	IPI00013917	IPI00013917	2,3	7.2315e-53	249.41	0.95678	0.95369	1.0088	1.0429	0.92869	0.95473
IIDEAIQAVK	0	1098.63	IPI00018931	IPI00018931	2	0.00099675	107.83	1.0501	0.94282	0.9959	1.0505	0.9287	0.93862
IAVMEIFRPK	0	1202.68	IPI00293464;IPI00909008;IPI00909251;IPI00909177	IPI00293464	2	2.0323e-08	163.64	0.93581	0.81528	0.95216	0.95416	0.92883	0.89824
DPAEGDGAQPEETPRDGDKPEETQGK	0	2752.21	IPI00383581;IPI00011454	IPI00383581	3,4	5.5994e-18	148.66	0.9767	1.0387	1.108	0.89463	0.92891	0.98254
GTIQVITQGTSIK	0	1344.76	IPI00011200;IPI00642548	IPI00011200	2	5.7815e-131	204.35	0.75696	0.72811	0.952	0.90145	0.92914	1.0606
ERDDIIRSIGEISAITSK	0	2002.07	IPI00307162;IPI00291175	IPI00307162	3	0.0017943	76.158	0.92727	0.97328	1.0888	0.96283	0.92915	0.96192
KIEISQHAK	1	1052.6	IPI00414860;IPI00926175;IPI00926815;IPI00924813	IPI00414860	2	2.0609e-05	130.94	0.92499	0.82703	0.9352	0.78194	0.92921	1.0747
SAIVHIINYQDDAEIATRAIPEITK	0	2780.47	IPI00789324;IPI00791432;IPI00788705;IPI00790671;IPI00554711	IPI00789324	3	3.222e-58	150.69	1.0117	0.90174	0.86664	0.80534	0.9293	1.145
EGDIIAAQARIK	0	1283.72	IPI00216952;IPI00021405;IPI00216953;IPI00644087;IPI00514320;IPI00514817;IPI00655812;IPI00965833;IPI00514204;IPI00910241;IPI00965567	IPI00216952	2	2.0911e-19	196.11	0.95536	0.91053	0.96409	0.93938	0.92939	1.0327
KGEITGEVRMPSGK	1	1487.78	IPI00333541;IPI00302592;IPI00644576;IPI00553169;IPI00552416	IPI00333541	3	0.010919	70.889	1.0004	0.89021	0.91468	0.90216	0.92949	0.98444
RGHVFEESQVAGTPMFVVK	0	2117.07	IPI00186290;IPI00909570	IPI00186290	2,3	5.1e-53	244.97	1.144	0.83253	0.76128	0.71928	0.92952	1.2832
AEPPKAPEQEQAAPGPAAGGEAPK	1	2297.13	IPI00299024	IPI00299024	3	2.2628e-29	176.67	0.95082	0.97384	1.0516	0.91606	0.92967	0.92629
RIMIFTNEDNPHGNDSAK	0	2057.96	IPI00644712;IPI00893062;IPI00889791;IPI00893179	IPI00644712	3	5.3794e-07	131.72	0.92185	1.0716	1.1614	1.0365	0.92977	0.88122
RDEITIEGIK	0	1172.64	IPI00009328	IPI00009328	2	0.0040154	79.82	0.99183	0.90347	0.92505	0.89226	0.92983	0.98258
KGPSGYGFNIHSDK	1	1505.73	IPI00003527;IPI00902652	IPI00003527	3	0.025426	58.885	0.97783	0.89758	0.92109	0.81768	0.92984	1.02
EAPPMEKPEVVK	0	1352.7	IPI00479058	IPI00479058	2,3	4.1663e-06	137.16	0.97641	0.96272	0.94397	0.97505	0.92985	1.0458
MPIIGIGTWK	0	1114.62	IPI00413641;IPI00556258;IPI00926520;IPI00220271;IPI00647702	IPI00220271	2	0.0027719	82.749	0.98722	1.0007	1.0106	1.0131	0.92987	0.95261
TVFAEHISDECK	0	1434.64	IPI00550021;IPI00651660;IPI00877635;IPI00877999;IPI00878524;IPI00877787;IPI00878827	IPI00550021	2	2.984e-13	176.51	1.2173	0.90862	0.74723	0.73067	0.92992	1.301
VRIMGPNYTPGK	0	1331.7	IPI00186290	IPI00186290	2,3	1.2943e-26	180.24	0.96463	0.92617	1.0315	1.0595	0.92997	0.92096
EMQQSEAQINTAK	0	1476.69	IPI00293078	IPI00293078	2	4.5786e-15	175.29	1.0351	0.92361	0.88334	1.0373	0.93001	0.99823
NCFRMTDQEAIQDIWQWRK	0	2524.17	IPI00549248;IPI00220740	IPI00549248	3	1.4724e-64	161.19	0.96392	0.69129	0.68843	0.86306	0.93022	1.1046
SIIITTIPQIGSTEWSETIHNIK	0	2580.38	IPI00011876;IPI00942294	IPI00011876	3	4.694e-07	104.89	1.0301	0.92947	0.88654	0.84994	0.93027	1.1882
ATEPVIAFYEK	0	1266.65	IPI00640817;IPI00018342;IPI00515036	IPI00640817	2	0.00089729	95.018	0.9967	0.94192	0.95269	0.96666	0.9303	1.0077
AAIEAQNAIHNMK	0	1409.71	IPI00853009;IPI00034015;IPI00956101;IPI00218389;IPI00218388	IPI00853009	2	4.6317e-30	208.82	0.965	0.93679	1.0049	0.99713	0.93036	0.86123
EVDEQMINVQNK	0	1445.68	IPI00013475;IPI00031370;IPI00930715;IPI00974224;IPI00956734;IPI00909140;IPI00645452;IPI00647896;IPI00953417;IPI00908770;IPI00007752;IPI00930130	IPI00007752	2,3	4.5368e-63	279.86	0.99196	0.92157	0.9747	0.99513	0.93053	1.0022
IDEIYGTWRK	0	1279.66	IPI00003918;IPI00795303;IPI00908662;IPI00878133	IPI00003918	2	0.0031037	85.533	0.95527	0.86229	0.87555	0.97141	0.93057	0.982
GVQYINEIK	0	1062.57	IPI00186290;IPI00909570;IPI00440662	IPI00186290	2	8.5866e-09	161.17	0.92568	0.90523	0.99018	0.92764	0.93058	1.0206
QIFIGGVDK	0	975.539	IPI00007188;IPI00455148;IPI00291467;IPI00645646	IPI00007188	2	3.7485e-08	147.75	0.97809	0.96447	0.99049	0.95976	0.93066	1.007
VIIIGDGGVGK	0	1026.61	IPI00014603;IPI00016372	IPI00014603	2	0.0020028	87.568	0.97311	0.89585	0.97216	1.0831	0.93076	0.97163
TPVTDPATGAVK	0	1155.61	IPI00028031;IPI00178744;IPI00937735	IPI00028031	2	4.4597e-05	132.17	1.1016	0.88986	0.82448	0.7867	0.93079	1.2141
DPNIVIAK	0	868.502	IPI00025252	IPI00025252	1,2	0.018048	73.931	1.0946	0.87613	0.84664	0.95174	0.93079	1.0273
MTPEQIAIK	0	1029.55	IPI00024821;IPI00936088	IPI00024821	2	0.011415	68.735	0.98618	0.87565	0.87863	0.95014	0.93093	0.96255
TIQEVTEMDSVK	0	1378.66	IPI00010951	IPI00010951	2	1.0256e-05	126.09	1.1533	0.96978	0.83971	0.837	0.93108	1.2144
VSTAVISITAK	0	1088.64	IPI00299608;IPI00456695	IPI00299608	2	0.0074175	71.153	0.98572	0.89054	0.91624	1.0178	0.93116	0.86408
VIMVTGDHPITAK	0	1380.74	IPI00006482;IPI00646182;IPI00414005;IPI00788782;IPI00008161;IPI00872242;IPI00375339;IPI00003021;IPI00302840;IPI00640401;IPI00647102;IPI00908591;IPI00647099	IPI00006482	2,3	6.2951e-10	152.85	0.95691	0.95998	0.9451	0.99339	0.93123	0.9164
IAPYSVEIK	0	1018.57	IPI00296337;IPI00376215;IPI00786995	IPI00296337	2	0.054947	45.137	1.0004	0.92339	1.0062	1.0079	0.93126	0.96211
VFDPVPVGVTK	0	1156.65	IPI00844578	IPI00844578	2	0.010017	67.456	0.9726	0.98687	0.98966	1.0389	0.93126	0.97877
SIADEIAIVDVIEDK	0	1628.85	IPI00219217;IPI00788938;IPI00789173	IPI00219217	2,3	1.9577e-32	223.7	1.0907	0.81633	0.7771	0.84251	0.93144	1.1388
ADEGISFRGIFIIDDK	0	1794.92	IPI00000874;IPI00640741;IPI00641244	IPI00000874	3	0.01053	64.394	0.79414	1.259	1.612	1.0129	0.93151	1.2244
VEESSWIIEDGK	0	1390.66	IPI00550746;IPI00647418	IPI00550746	2	2.2671e-13	172.76	0.97495	0.92681	0.99066	1.0775	0.93152	0.89598
AIRGHIENNPAIEK	0	1560.84	IPI00008530;IPI00871646;IPI00556485;IPI00794884;IPI00793002;IPI00791188;IPI00868999;IPI00797741;IPI00791448;IPI00790287;IPI00798371	IPI00008530	2,3	1.6568e-42	237.21	0.96548	0.92201	0.94603	0.96624	0.93166	0.96716
EGIEIPEDEEEK	0	1415.63	IPI00414676;IPI00555614;IPI00382470;IPI00784295;IPI00604607;IPI00555876;IPI00555565	IPI00382470	2	1.4723e-19	186.58	1.0016	0.91416	0.91146	0.8801	0.9317	1.0363
EPAVIEIEGK	0	1083.58	IPI00008274;IPI00639931;IPI00939159	IPI00008274	2	0.012544	65.719	1.0714	0.90626	0.87117	1.0084	0.93174	0.91999
KPITSSSAAPQRPISTQRTAAAPK	0	2463.36	IPI00017596;IPI00910350	IPI00017596	3,4	3.2942e-08	99.407	0.86586	1.1153	1.1784	1.0633	0.93199	0.86305
IMINTPEDVQAIVSGK	0	1713.9	IPI00105598	IPI00105598	2	1.4462e-155	209.89	0.94131	0.9591	1.0115	1.0237	0.93213	0.91811
GTVRPANDFNPDADAK	0	1686.8	IPI00221226;IPI00002459;IPI00974274	IPI00221226	2	9.7607e-19	177.04	0.87875	0.9144	0.97764	0.91012	0.93222	0.95542
AAEAAAAPAESAAPAAGEEPSK	0	1965.93	IPI00299024	IPI00299024	3	0.00010359	85.937	0.97182	1.9614	1.9748	0.95795	0.93234	1.0027
VAVISQNRTENAQK	0	1556.83	IPI00291419	IPI00291419	2,3	3.7296e-55	261.67	0.94466	0.91196	0.98009	0.99772	0.93234	0.9973
MNIPGEVTFIPINK	0	1571.84	IPI00219420	IPI00219420	2	3.3635e-05	115.06	0.85863	0.82142	0.96752	0.86423	0.93255	0.97628
DDPITNINTAFDVAEK	0	1761.84	IPI00921118;IPI00759776;IPI00013508;IPI00909239	IPI00921118	2	2.7438e-60	266.45	0.99988	0.88939	0.8947	0.98411	0.93257	0.963
GGAAPEGPNEAEVTSGKPEQEVPDAEEEK	0	2950.33	IPI00332499;IPI00179953	IPI00332499	3	6.6231e-30	169.19	0.87168	0.92657	1.0657	0.99309	0.93272	1.0721
FIDGDEITIADCNIIPK	0	1932.95	IPI00394749;IPI00165936;IPI00027193;IPI00294443;IPI00844301	IPI00394749	2	8.1127e-06	125.98	1.1626	1.0513	1.0259	1.0249	0.9328	1.0112
WNTDNTIGTEITVEDQIARGIK	0	2473.24	IPI00216308;IPI00790304	IPI00216308	3	0.0064378	61.648	0.99311	0.88402	0.90774	0.91622	0.93302	0.95334
HIAEEADRKYEEVARK	1	1942.99	IPI00216975;IPI00010779;IPI00967467;IPI00218319;IPI00909961;IPI00479185;IPI00382894;IPI00218320;IPI00642042;IPI00854592;IPI00643370;IPI00183968;IPI00477649;IPI00645055;IPI00647245	IPI00216975	3	4.7981e-11	155.08	0.93748	0.89025	1.0586	1.0019	0.93321	0.89735
SAIASVIMGISTIIGK	0	1559.9	IPI00335449;IPI00939356;IPI00294178;IPI00909011;IPI00973793	IPI00335449	2	0.0022613	104.45	1.0936	0.86677	0.81052	0.70283	0.93322	1.2262
ENDFDRIVIQYAPSA	0	1736.84	IPI00465132;IPI00399318;IPI00399319	IPI00465132	2	3.9985e-06	128.22	1.103	0.9915	0.84065	0.86432	0.93327	0.92035
IFKPIFIQRIQGK	0	1586.97	IPI00031696;IPI00964536	IPI00031696	3	0.0052477	73.781	0.96066	1.0441	0.98026	0.94848	0.93333	0.96663
IVSIGAEEIVDGNAK	0	1513.8	IPI00013808;IPI00908458;IPI00908776	IPI00013808	2	0.011623	64.04	0.97509	0.98147	1.0309	0.94049	0.93343	0.97365
SAIAIAIK	0	785.501	IPI00299155;IPI00789638;IPI00790207;IPI00795606;IPI00792218	IPI00299155	1	0.0016466	107.32	1.1619	0.87741	0.75802	0.7332	0.93345	1.2594
ARAIGTEVIQIFPEK	0	1670.94	IPI00000690;IPI00157908;IPI00300018	IPI00000690	2	7.1304e-17	190.11	0.92384	0.92446	0.97943	0.91247	0.93361	0.98686
RAVAREESGKPGAHVTVK	0	1891.04	IPI00396378;IPI00916517;IPI00414696	IPI00396378	2,3,4	2.2634e-14	164.57	0.96539	0.9838	1.0294	0.98672	0.93363	1.0325
GVIIYGPPGTGK	0	1157.64	IPI00011126;IPI00848107;IPI00895901;IPI00023919;IPI00745502;IPI00555749	IPI00023919	2	0.002651	80.979	0.93718	0.94629	1.0322	0.96282	0.93369	1.0193
FVISGANIMCPGITSPGAK	0	1918.96	IPI00645446;IPI00179026;IPI00900380	IPI00645446	2	2.8363e-10	146.15	0.95178	0.9584	1.0018	0.91887	0.9337	0.94546
WISIMTERSVPHIQK	0	1823.97	IPI00418169;IPI00455315;IPI00334627;IPI00903334	IPI00418169	2,3	1.7862e-23	203.2	0.95648	0.96611	0.96791	0.97849	0.93372	0.98666
DYMRQAGEVTYADAHK	0	1853.84	IPI00000015	IPI00000015	3	0.00019227	111.43	0.98229	0.97207	0.95253	1.0013	0.93372	0.97033
IDHHPEWFNVYNK	0	1697.8	IPI00218568	IPI00218568	2	0.0085195	69.864	1.2487	0.90976	0.72986	0.80718	0.934	1.1612
NVPNIHVMK	0	1050.56	IPI00749512;IPI00478810;IPI00008438;IPI00791589;IPI00025842;IPI00414852	IPI00749512	2	0.0060387	81.594	1.1097	0.9335	0.7248	0.72374	0.93401	1.3383
ERVEAVNMAEGIIHDTETK	0	2141.04	IPI00007765;IPI00922694	IPI00007765	2,3	1.1235e-30	202.35	0.91436	0.92073	1.0171	0.99394	0.93407	0.98278
FPFVAISK	0	907.517	IPI00419916;IPI00956631	IPI00419916	1,2	0.0068213	81.297	1.0513	0.96501	0.92415	0.95218	0.93423	1.0312
MAQWGNKPVC	0	1189.54	IPI00246975	IPI00246975	2	3.1726e-12	174.02	0.95158	0.95418	1.0034	0.94583	0.9344	1.0019
KHPDASVNFSEFSK	1	1591.76	IPI00419258;IPI00645948;IPI00644653;IPI00643746;IPI00418184	IPI00419258	2,3	1.027e-14	172.82	0.96327	0.9077	0.98043	0.9492	0.93446	0.95961
TVDIKPDWGK	0	1157.61	IPI00013894;IPI00479946;IPI00908463	IPI00013894	2	0.00032355	113.93	1.2773	0.96806	0.73487	0.80299	0.93455	1.237
DVQTAIAIAK	0	1028.59	IPI00017726;IPI00336094;IPI00639797	IPI00017726	2	0.00044955	124.1	1.0655	0.91149	0.93718	0.87833	0.93455	1.0579
NSQGEEVAQRSTVFK	0	1678.83	IPI00217975	IPI00217975	2	3.825e-10	157.35	1.0623	0.85382	0.88358	0.82909	0.93463	1.2058
NSTFSEIFKK	1	1199.62	IPI00643920;IPI00942979;IPI00792641;IPI00940673;IPI00793119;IPI00789310	IPI00643920	2	0.00063538	110.66	1.1726	0.84992	0.74718	0.67974	0.93465	1.3171
KIPEYNPRTI	1	1229.68	IPI00465044	IPI00465044	2	0.004862	81.771	0.93741	0.91119	0.95349	0.99316	0.93465	0.96474
VIISAIERIK	0	1140.72	IPI00218342;IPI00794900	IPI00218342	2,3	2.5809e-05	126.71	0.99271	0.85626	0.9185	0.98221	0.93479	0.99311
RAIDINIK	0	941.566	IPI00220416;IPI00790644;IPI00798386;IPI00974054	IPI00220416	2	0.0064582	84.213	0.98712	0.83517	0.89147	0.85577	0.93487	1.05
GKPIRIMWSQRDPSIRK	0	2067.15	IPI00642904;IPI00012726;IPI00555747;IPI00642944;IPI00644016	IPI00642904	3	0.041702	50.305	1.0124	1.1209	1.0648	0.94631	0.93497	1.0514
AIRMCHPSIEGFTPRIPMNK	0	2354.18	IPI00889534;IPI00011062;IPI00397498	IPI00889534	3,4	2.3947e-25	186.72	0.95374	1.1594	1.1419	1.0445	0.93497	0.87698
EINYFAK	0	883.444	IPI00169383;IPI00916818;IPI00910974	IPI00169383	2	1.8737e-15	127.12	1.0711	0.89855	0.81858	0.99698	0.93499	0.96643
RDIMACAQTGSGK	0	1393.64	IPI00215637;IPI00910433;IPI00293616;IPI00646152	IPI00215637	2	1.944e-14	179.56	0.9981	0.94937	0.95149	0.88121	0.93509	1.0756
SQETECTYFSTPIIIGK	0	1972.95	IPI00291006;IPI00924593;IPI00927864	IPI00291006	2	5.5114e-60	256.71	1.0938	0.51641	0.47048	0.79046	0.93514	1.2135
VTVAGIAGKDPVQCSRDVVICPDASIEDAK	1	3169.57	IPI00298547	IPI00298547	3	7.8791e-14	117.03	0.92631	1.0921	1.1641	1.0697	0.93533	1.002
YGVNPGPIVGTTRK	0	1457.8	IPI00216230;IPI00830089;IPI00030131;IPI00791301;IPI00873716;IPI00181409	IPI00216230	2,3	5.652e-23	199.31	1.0186	0.95502	0.95629	0.89305	0.9354	1.0811
IQAQVRIGGK	0	1068.64	IPI00221035;IPI00419473;IPI00965254;IPI00015946;IPI00412792	IPI00221035	2	2.0775e-10	175.91	0.98886	0.89322	0.89917	0.95694	0.9354	1.0103
IQVTMPGIK	0	985.563	IPI00021812	IPI00021812	2	0.0017872	102.61	0.93575	0.90712	0.96289	0.93261	0.93545	1.0307
QKVDSIIENIEK	1	1414.77	IPI00477313;IPI00216592;IPI00909232;IPI00759822;IPI00911096;IPI00759596;IPI00027569;IPI00735540;IPI00887991	IPI00477313	2	6.6625e-08	170.79	0.98518	0.97414	0.98486	0.94769	0.93561	0.95698
NSHCVRFVPQEMGVHTVSVK	0	2310.14	IPI00900293;IPI00289334;IPI00477536;IPI00943563;IPI00382697;IPI00953109;IPI00940093;IPI00945610;IPI00798140;IPI00798186	IPI00900293	3	1.9336e-22	180.1	1.1904	0.93966	0.80292	0.65233	0.93582	1.6796
MSMANRGQNQPVINITNK	0	2015	IPI00889534;IPI00011062	IPI00889534	2,3	8.9576e-28	194.94	0.88284	0.96886	1.1017	0.93599	0.93586	1.0545
IRAFIIPK	0	956.617	IPI00647286;IPI00456750	IPI00647286	2	0.00037962	133.12	1.02	0.97083	1.0026	0.9479	0.93599	0.97549
GGVAGGSIIK	0	857.497	IPI00297982;IPI00900305;IPI00900297	IPI00297982	2	0.00096887	99.973	0.94072	0.89784	0.92774	0.83983	0.936	1.1729
TAEEIMNFSK	0	1168.54	IPI00784090;IPI00302925;IPI00797206	IPI00784090	2	0.00054827	120.77	1.1232	0.94346	0.92871	0.84819	0.936	1.1137
QPIIRSMRTVK	0	1327.78	IPI00298961;IPI00893013	IPI00298961	2	0.00023602	115.33	0.97021	0.88787	0.99321	0.98708	0.9363	0.95665
CDENIIWIDYK	0	1467.67	IPI00479186;IPI00941899;IPI00220644;IPI00910979;IPI00909560;IPI00847989;IPI00888126	IPI00479186	2	5.2179e-08	145.17	1.0842	0.90094	0.78898	0.82252	0.93641	1.1962
VFRAVRETQEREAK	0	1717.92	IPI00298520;IPI00514053;IPI00915422;IPI00439944	IPI00298520	3	0.0090374	68.515	0.9097	0.91295	0.99274	0.93445	0.93643	0.93114
IGGSQEDQIK	0	1073.54	IPI00744692	IPI00744692	2	4.8536e-18	189.57	0.90299	0.95677	0.95324	0.96809	0.93644	0.91426
AGDIRDTGIFIDIMHIK	0	1914	IPI00644712;IPI00893062;IPI00889791;IPI00893179	IPI00644712	3	5.6998e-19	184.48	1.0028	1.0748	1.0394	1.1432	0.93651	0.87627
GFGRGGAESHTFK	0	1349.65	IPI00215611	IPI00215611	2,3	1.563e-06	147.73	1.1347	0.91743	0.81757	0.79855	0.93658	1.3008
SRIDSRTGVAPDVFAENMK	0	2092.04	IPI00008475	IPI00008475	3	0.00033118	91.457	1.1484	0.93678	0.82994	0.81943	0.93658	1.1272
IINRPIIVFRGEHGFIGCRK	0	2381.33	IPI00747810;IPI00163187;IPI00894286;IPI00894471	IPI00747810	3,4	0.0076551	58.246	0.87873	0.93256	1.06	1.022	0.93658	0.98352
RFPGYDSESK	0	1184.55	IPI00000494	IPI00000494	2	4.0683e-06	126.71	1.0441	0.98365	0.93485	0.91556	0.93659	1.0225
AYARIGNSYFK	0	1288.66	IPI00013894;IPI00479946;IPI00908463	IPI00013894	2	7.3036e-09	162.36	0.99369	0.80361	0.85654	0.90949	0.93667	1.1023
VCNPIITK	0	943.516	IPI00003865;IPI00880019	IPI00003865	2	0.0031976	90.657	0.91398	0.97275	1.0042	1.0004	0.93673	0.93533
VHVGDEDFVHIRVFQSIPHENKPITISNYQTNK	0	3860.96	IPI00021828	IPI00021828	4	0.050164	35.923	0.93144	1.2831	1.2476	1.5863	0.93675	0.81911
VQREPIITIVK	0	1294.8	IPI00012268;IPI00926258;IPI00796340;IPI00926410	IPI00012268	2	1.1076e-06	144.1	0.88286	0.86385	0.96706	1.0308	0.93679	0.92811
AIGPHDVIATIINNIK	0	1687.96	IPI00026089;IPI00917430	IPI00026089	3	2.3983e-05	120.84	1.0206	0.96534	0.89915	0.93373	0.9368	0.9841
QSSSSRDDNMFQIGK	0	1698.76	IPI00221222	IPI00221222	2	7.6641e-41	230.86	1.0373	0.97803	0.94686	0.8752	0.93687	1.0512
RSFIIDIINATGK	0	1446.82	IPI00215637	IPI00215637	2	1.5664e-21	186.05	1.0363	0.92711	0.91718	0.92907	0.93701	0.97654
TAIIHDGIARGIREAAK	0	1791.01	IPI00013917	IPI00013917	2,3	1.7634e-09	152.07	1.0777	0.82757	0.84239	0.77409	0.93702	1.2306
ETIPDIDPNAK	0	1211.6	IPI00646493;IPI00295857	IPI00646493	2	0.00018438	107.06	1.0878	0.86155	0.78237	0.9599	0.93731	0.99354
KPMVIGHEASGTVEK	0	1581.82	IPI00216057;IPI00922510	IPI00216057	2	5.06e-07	138.05	0.97399	0.99693	0.93951	1.0437	0.93745	0.96887
IAVAAQNCYK	0	1136.56	IPI00465028;IPI00797270;IPI00796633;IPI00451401	IPI00465028	2	5.8732e-08	148.52	0.90702	0.97799	1.0727	1.075	0.93745	0.94378
GIVIMSRAK	0	973.574	IPI00020984;IPI00941747;IPI00964308;IPI00477719;IPI00442866;IPI00966898;IPI00964865;IPI00967621;IPI00966032;IPI00964989;IPI00967973	IPI00020984	2	4.2495e-18	193.38	0.85909	0.87353	0.9879	0.91783	0.93748	1.0731
DCAVIVTQK	0	1032.53	IPI00029623;IPI00867679	IPI00029623	2	0.00053093	109.66	1.1138	0.88612	0.74987	0.88637	0.93754	1.0581
DIAEDAPWK	0	1043.49	IPI00333541;IPI00302592;IPI00644576;IPI00553169;IPI00927825;IPI00900293;IPI00289334;IPI00477536;IPI00943563;IPI00382697;IPI00953109;IPI00382698;IPI00382699;IPI00178352;IPI00413958	IPI00333541	2	0.00021405	128.86	1.036	0.89517	0.92909	0.96536	0.93763	0.94103
IQVSQQEDITK	0	1287.67	IPI00921428;IPI00020906;IPI00974011;IPI00974104	IPI00921428	2	0.00042081	107.09	1.0343	0.95769	0.9028	0.8982	0.93777	0.98398
FVMQEEFSRDGK	0	1471.68	IPI00025252	IPI00025252	2,3	8.634e-09	153.75	1.0006	0.94725	0.93782	0.94144	0.93778	1.0562
EWAHATIIPK	0	1164.63	IPI00554737;IPI00908543;IPI00910732;IPI00168184;IPI00798040;IPI00910515	IPI00554737	2	6.1068e-06	140.49	1.0817	0.93953	0.90099	0.84588	0.93784	1.032
DSPSVWAAVPGK	0	1212.61	IPI00216691;CON__P02584	IPI00216691	2	1.174e-19	190.53	1.0194	0.925	0.9172	0.92198	0.93785	1.0332
INEAVECIISIK	0	1387.74	IPI00013452;IPI00909383	IPI00013452	2	3.4015e-06	138.55	1.0327	1.0308	0.94745	0.98404	0.93804	0.95479
RKREEISNVIAAMRK	1	1800.02	IPI00216237	IPI00216237	3	0.0019559	102.73	1.0357	1.0341	1.0249	1.0068	0.9381	1.0727
EAMEDGEIDGNK	0	1306.53	IPI00604620;IPI00444262;IPI00183526;IPI00916188	IPI00604620	2	7.3454e-05	130.1	1.0545	0.85537	0.77813	0.89763	0.93821	1.0975
ARFEEVISK	0	1077.58	IPI00647286;IPI00456750	IPI00647286	2	5.3854e-10	188.99	0.96375	0.73122	0.81443	1.1569	0.93831	0.83488
AIEENNNFSK	0	1164.54	IPI00479997;IPI00921996;IPI00218667;IPI00795953	IPI00479997	2	1.1059e-25	209.97	0.96338	0.95517	0.95506	1.015	0.93832	1.0181
AAAQIIQSQAQQSGAQQTK	0	1956	IPI00019376;IPI00967716;IPI00952909;IPI00964937;IPI00965828;IPI00967443	IPI00019376	3	5.1728e-41	223.29	0.97895	1.0171	0.98475	1.0403	0.93849	0.92958
NQAINIAWQK	0	1184.63	IPI00007927;IPI00232806	IPI00007927	2	0.00021535	132.01	1.1101	1.0116	0.95954	0.93459	0.9385	1.1563
YIQIQQEK	0	1048.56	IPI00004962;IPI00945220;IPI00794742	IPI00004962	2	0.014211	73.665	2.0168	0.93995	0.64565	0.74598	0.93857	1.1947
RNIYIMDTSGK	0	1296.65	IPI00020127	IPI00020127	2	0.033802	73.848	1.1455	0.86307	0.76424	0.908	0.9386	1.0127
IIPDDPYEK	0	1088.54	IPI00019755;IPI00642936;IPI00513927	IPI00019755	2	0.0043417	81.338	1.0113	0.96898	1.0052	0.97317	0.93867	0.97946
EEREIRQQIAEK	0	1527.8	IPI00026089	IPI00026089	2	8.1771e-09	154.36	1.0052	1.0137	0.9609	1.0774	0.93871	1.0127
ITPVTVK	0	756.475	IPI00908873;IPI00216654;IPI00292387	IPI00908873	2	0.043746	55.676	0.98545	1.0054	0.91888	1.0537	0.93879	0.93404
GPIQSVQVFGRK	0	1314.74	IPI00221092;IPI00450975;IPI00397701	IPI00221092	2,3	5.7595e-14	182.35	0.98309	0.93976	0.94578	0.99828	0.93885	0.94899
EEMARHIREYQDIINVK	0	2143.08	IPI00418471	IPI00418471	2,3	1.0648e-27	210.37	0.98616	0.94602	1.0242	1.0099	0.93897	0.99096
TGTITTFEHAHNMRVMK	0	1972.96	IPI00186290	IPI00186290	3	4.3468e-07	134.04	1.0826	0.89982	0.87596	0.74528	0.93906	1.3169
IRPFAVAAVIRNIK	0	1566.97	IPI00300074	IPI00300074	3	1.4511e-10	164.04	1	0.88951	0.93279	0.97758	0.93908	1.0075
VRIMGPNYTPGKK	1	1459.8	IPI00186290	IPI00186290	2,3	4.4457e-07	145.6	0.99259	0.9323	0.94752	0.90541	0.93909	0.9864
MFVGQVPRTWSEK	0	1563.79	IPI00853009;IPI00034015;IPI00956101;IPI00218389;IPI00218388	IPI00853009	2	5.9996e-52	255.16	0.84569	0.81146	1.0204	0.93467	0.93913	1.0518
GIRITVK	0	785.512	IPI00024933;IPI00868816	IPI00024933	2	0.00072676	104.45	1.0493	0.93432	0.90579	0.91815	0.93916	1.1092
AQSAGTVRSAAPPQEK	0	1596.82	IPI00761160;IPI00761140;IPI00760715;IPI00968085;IPI00305750;IPI00220857;IPI00964032;IPI00413492;IPI00921920;IPI00761035;IPI00761069;IPI00964761;IPI00966074;IPI00967304;IPI00970915;IPI00965413;IPI00973916;IPI00964778	IPI00761160	3	2.8096e-06	128.06	0.92523	0.83913	0.99987	0.92896	0.93935	0.99683
AISTDPAAPNIK	0	1196.64	IPI00298994	IPI00298994	2	0.00044936	105.2	1.0665	1.0631	0.94911	1.3941	0.93948	0.68608
GCSFIPDPYQK	0	1310.6	IPI00219825;IPI00744835;IPI00873020;IPI00873201;IPI00012503;IPI00556640	IPI00219825	2	0.00071275	99.283	0.89804	0.8993	1.0224	0.83691	0.93954	1.147
SDIQRPNPQSPFCVASSIK	0	2130.05	IPI00011448	IPI00011448	3	8.4968e-41	218.28	1.2032	0.87779	0.75948	1.0354	0.93978	1.0661
EAIEPSGENVIQNK	0	1526.76	IPI00007940;IPI00936931	IPI00007940	2	5.4828e-16	184.21	1.0498	0.95558	0.84045	1.001	0.93979	0.95907
EVGSIIGK	0	801.46	IPI00016610;IPI00027973;IPI00385206;IPI00952792;IPI00386254;IPI00946887;IPI00946082;IPI00945164;IPI00945892;IPI00946687;IPI00946372;IPI00947004;IPI00012066;IPI00790627;IPI00470509;IPI00796337;IPI00216689;IPI00791223;IPI00900327;IPI00027970;IPI00410587;IPI00550365;IPI00167750;IPI00410586;IPI00101278	IPI00012066	2	0.00017408	121.09	1.0025	0.97417	0.99412	0.99117	0.93985	1.0156
MYGAQEDGSVGEGDISCIIK	0	2127.95	IPI00171626	IPI00171626	2	7.4267e-31	193.63	0.99206	0.98157	1.0226	1.0036	0.93998	1.0584
AIQDHIIEVEQSK	0	1508.78	IPI00742682	IPI00742682	2	2.4998e-09	155.57	0.96074	0.96359	0.99038	0.97591	0.94013	0.94567
GAEAANVTGPGGVPVQGSK	0	1694.86	IPI00643351;IPI00031812;IPI00450235	IPI00643351	2,3	1.775e-30	196.89	0.95029	0.9227	0.95382	0.94648	0.94017	1.0235
KVVYENAYGQFIGPHRIK	1	2118.14	IPI00884896;IPI00885213;IPI00783641;IPI00847482;IPI00871867;IPI00973082;IPI00554786;IPI00967892	IPI00884896	3	8.3667e-05	110.38	1.1365	0.89325	0.81626	0.97057	0.94017	1.0029
VACITEQVITIVNK	0	1586.87	IPI00025874;IPI00793589	IPI00025874	2	8.7256e-55	250.89	0.94993	1.0098	1.0068	1.0587	0.94034	0.89312
VQIPIMIVGNK	0	1210.71	IPI00016669;IPI00947020;IPI00945139	IPI00016669	2	0.0027903	82.261	1.0393	0.97284	0.98622	1.079	0.94034	0.91437
DQEFTVDTRGAGGQGK	0	1664.78	IPI00900293;IPI00289334;IPI00477536;IPI00943563;IPI00382697;IPI00953109;IPI00940093;IPI00945610;IPI00382698;IPI00382699	IPI00900293	2	8.4267e-19	179.14	1.0817	0.94411	0.84335	0.88785	0.94038	1.0314
EEVRRIIGIIDAYIK	0	1787.03	IPI00000875;IPI00937615;IPI00738381;IPI00909534;IPI00908389	IPI00000875	2,3	0.00013186	113.25	0.95031	1.0577	1.0555	1.0529	0.94045	0.93657
THEAQIQEMRQK	0	1497.74	IPI00019502	IPI00019502	2,3	2.0968e-13	173.72	0.96524	0.7552	0.81856	0.69096	0.94048	1.3169
INEVQTDVGVDTK	0	1416.71	IPI00183508;IPI00385754;IPI00878175;IPI00816829	IPI00183508	2	6.7465e-10	151.56	0.97547	0.9275	0.94555	0.90245	0.94055	1.0115
ENVNSIIPVFEEFIK	0	1776.93	IPI00001159	IPI00001159	2	4.5468e-07	139.65	1.0134	0.88065	0.89938	0.90022	0.94064	1.0551
RGIRNQREHTAIIK	0	1690.97	IPI00029731;IPI00793102;IPI00926288;IPI00926495	IPI00029731	3	0.028547	54.343	0.99045	0.966	0.93472	0.88838	0.94067	1.1696
TYVTPRRPFEK	0	1392.75	IPI00221088;IPI00925580;IPI00879238;IPI00647546;IPI00853062;IPI00879512	IPI00221088	2,3	0.034587	50.354	1.1099	0.95394	0.8521	0.74875	0.94069	1.295
VSQGQIVVMQPEK	0	1441.76	IPI00009904	IPI00009904	2	5.7978e-11	163.99	0.9845	0.98603	0.98841	1.0499	0.94075	0.93095
DFSWSPGGNIIAFWVPEDK	0	2164.03	IPI00719752;IPI00396370	IPI00719752	2	8.8183e-21	151.63	1.2259	0.91848	0.76792	1.0352	0.94076	0.92997
TSACFEPSIDYMVTK	0	1747.78	IPI00889534;IPI00011062;IPI00397498	IPI00889534	2	1.0521e-42	232.17	1.0273	1.0537	0.91348	0.78246	0.94082	1.3221
VEGDMQVPDIDIK	0	1457.71	IPI00021812	IPI00021812	2	0.041794	50.562	0.93849	0.96817	0.99159	0.97778	0.94085	0.90745
EGEEAGPGDPIIEAVPK	0	1706.84	IPI00013122	IPI00013122	2	1.4034e-15	165.75	0.94225	0.97871	1.0149	0.88803	0.941	1.0559
ARGTRIDGIDIVDTWK	0	1814.96	IPI00419916;IPI00956631;IPI00643764	IPI00419916	2,3	4.9163e-16	182.02	0.98473	0.9046	0.97726	0.9918	0.94108	0.96217
EAAISTAISEK	0	1118.58	IPI00216952;IPI00021405;IPI00216953;IPI00644087;IPI00514320;IPI00514817;IPI00655812;IPI00965833;IPI00514204;IPI00910241;IPI00965567	IPI00216952	2	3.2357e-27	211.46	0.99212	0.86503	0.95006	1.0018	0.94116	0.98377
IAEVDCTAERNICSK	0	1764.81	IPI00171438;IPI00939560	IPI00171438	2	3.6097e-32	217.48	0.94393	0.94484	1.0059	1.0319	0.94124	0.83059
IRSDAGIESDTAMK	0	1492.72	IPI00015953	IPI00015953	2	2.9515e-10	154.65	1.0659	0.84087	0.83497	1.0989	0.94136	0.82117
NIDDTIDDEK	0	1176.51	IPI00642904;IPI00012726;IPI00555747;IPI00642944;IPI00885166;IPI00973757	IPI00642904	2	0.00099615	107.85	1.0154	0.90709	0.91304	0.91637	0.94176	1.1005
AGFAGDQIPK	0	1002.51	IPI00029468;IPI00908883;IPI00029469;IPI00917682	IPI00029468	2	0.0016105	93.096	0.96095	0.96401	0.99814	0.93419	0.94176	1.0427
YQHTGAVIDCAFYDPTHAWSGGIDHQIK	0	3186.46	IPI00013468;IPI00514701;IPI00644108;IPI00644568	IPI00013468	3	3.3336e-29	162.72	1.0959	0.83687	0.82365	0.79274	0.94178	1.1878
GVDIVMDPIGGSDTAK	0	1573.77	IPI00156689	IPI00156689	2	0.001933	83.106	1.0095	0.92381	0.92167	0.993	0.94197	0.95454
RMGPGAASGGERPNIK	0	1596.82	IPI00008964;IPI00896425	IPI00008964	2,3	1.2162e-18	173.25	0.98022	0.9855	0.99799	0.97138	0.94211	0.99979
IRAIIRISQECEK	0	1614.89	IPI00002966	IPI00002966	2,3	7.6706e-10	149.69	0.92695	0.98818	0.98472	1.1662	0.94215	0.88863
IEQIQNHENEDIYK	0	1771.84	IPI00012578;IPI00946316	IPI00012578	2	4.9837e-32	222.45	0.89145	0.99741	1.0517	1.0515	0.94216	0.87356
SRGFAFVTFESPADAK	0	1728.85	IPI00304692;IPI00552938;IPI00004450;IPI00061178;IPI00643486;IPI00167369	IPI00304692	2	9.5606e-13	157.74	1.0523	0.89961	0.82642	0.7348	0.94218	1.2387
FSMPGFK	0	812.389	IPI00021812;IPI00555610	IPI00021812	1,2	1.9986e-05	142.11	1.0466	0.94612	0.90871	0.84485	0.94225	1.1256
FVADGIFK	0	895.48	IPI00011253;IPI00974484	IPI00011253	2	0.0037943	93.429	0.99417	0.95572	0.85306	0.91805	0.94243	1.021
EDCEQWWEDCRTSYTCK	0	2351.89	IPI00441498	IPI00441498	3	9.7381e-07	133.48	0.91405	0.94564	1.0873	1.0027	0.94243	0.90906
ATISNDGATIIK	0	1202.65	IPI00018465;IPI00552072;IPI00952607	IPI00018465	2	2.6595e-06	149.69	0.99036	0.8718	0.85508	0.8562	0.94244	1.0744
ISIEEFIRGAK	0	1261.7	IPI00219103;IPI00219344;IPI00395510	IPI00219103	2	6.3899e-06	141.08	0.94471	0.85273	0.89134	0.95924	0.94252	0.98373
QASEGPIK	0	828.434	IPI00219018;IPI00795257;IPI00789134;IPI00788737	IPI00219018	2	0.00017416	144.12	0.85346	0.94957	1.0134	0.8313	0.94272	1.1684
IVPVEITISIIK	0	1323.84	IPI00219953;IPI00908752;IPI00514929;IPI00514049	IPI00219953	2	0.0077331	72.958	0.97934	1.0366	0.98143	1.1766	0.9428	0.82926
RIVQSPNSYFMDVK	0	1682.85	IPI00974209;IPI00514399;IPI00397358;IPI00420117;IPI00746004;IPI00930154;IPI00847956	IPI00974209	2	1.0294e-06	138.55	0.99361	0.95665	0.93972	1.0203	0.94287	0.93774
ISAIAIISIIPSDNSVIQDK	0	2096.17	IPI00913938;IPI00301107;IPI00965867	IPI00913938	2,3	1.3185e-05	109.66	0.95743	1.0298	1.0821	1.0354	0.9429	1.0146
IDTSQWPIIIK	0	1312.74	IPI00221394;IPI00873935;IPI00874145;IPI00915274;IPI00852712;IPI00852780;IPI00893630	IPI00221394	2	3.0137e-06	151.79	0.89097	1.0164	1.1892	1.1647	0.94296	0.85955
IVRTFRIETRK	0	1417.85	IPI00290460;IPI00885107	IPI00290460	3	0.034588	50.353	1.079	0.94669	0.85232	1.1469	0.943	0.86557
FGVEQDRMDK	0	1223.56	IPI00029601;IPI00062884;IPI00746806;IPI00791680	IPI00029601	2	0.00010608	139.43	1.0439	0.89477	0.85726	0.86976	0.94304	1.1178
VEQIGAEGNVEESQK	0	1615.77	IPI00006932;IPI00216804	IPI00006932	2,3	3.3498e-16	181.51	0.98762	0.97356	0.93734	1.0242	0.94321	0.9772
IKDDEVAQIK	1	1157.63	IPI00219217	IPI00219217	2	2.3761e-16	211.64	0.963	0.90674	0.96186	0.91184	0.94335	0.99292
GIIAADESTGSIAK	0	1331.69	IPI00796333;IPI00465439	IPI00796333	2	1.1746e-252	241.84	0.92994	0.86586	0.90039	0.91472	0.9434	1.031
VITGVAGEDAECHAAK	0	1626.77	IPI00007402	IPI00007402	2,3	3.1057e-74	273.99	0.98999	0.94456	0.96556	1.004	0.9434	0.97111
NFGEDMDDERIK	0	1467.63	IPI00008524;IPI00410017;IPI00796945;IPI00909378;IPI00301154;IPI00794246	IPI00008524	2	3.3518e-13	166.6	1.0124	0.89582	0.8382	0.82934	0.94345	1.1941
TCIIIVFSK	0	1079.6	IPI00478231;IPI00927114;IPI00552834;IPI00027434;IPI00647268;IPI00926710;IPI00643368;IPI00789934;IPI00644425;IPI00926881;IPI00926466;IPI00000041	IPI00478231	2	0.00059511	107.83	1.1129	0.87545	0.78859	0.79658	0.94346	1.2414
NYTDNEIEK	0	1124.5	IPI00016801;IPI00746092	IPI00016801	2	0.018616	63.283	1.1482	0.99781	0.82602	0.77539	0.94347	1.3023
GRTVIIEQSWGSPK	0	1556.83	IPI00784154;IPI00917575;IPI00915941;IPI00917983;IPI00917686;IPI00916653;IPI00973036	IPI00784154	2,3	2.2192e-55	264.92	0.98149	0.94673	0.9572	0.92829	0.94347	1.007
AFIDAIQNQAEASSK	0	1591.78	IPI00030275	IPI00030275	2	2.2536e-69	274.48	0.96875	0.91549	0.94818	0.97867	0.94349	0.97792
REQEVNIIK	0	1127.63	IPI00019502	IPI00019502	2	2.9172e-05	152.54	0.97432	0.90844	0.98071	0.90592	0.94351	1.0866
DHPFGFVAVPTK	0	1313.68	IPI00450472;IPI00032957	IPI00450472	2	0.070832	40.377	0.96084	0.87976	0.90058	0.92963	0.94355	0.97168
AAAAAAAIQAK	0	955.545	IPI00003918;IPI00795303;IPI00792159	IPI00003918	2	5.9469e-92	193.82	1.0291	0.93101	0.90298	0.90716	0.94358	1.0387
IFVGGINPEATEEK	0	1502.76	IPI00334587;IPI00742926;IPI00964992;IPI00334713;IPI00966854;IPI00964686	IPI00334587	2	2.5124e-137	194.59	0.95933	1.0214	1.0339	1.057	0.94366	0.93497
IVEMSTSK	0	893.453	IPI00376005;IPI00411704;IPI00006935;IPI00946642;IPI00946502;IPI00945644	IPI00376005	2	0.0042354	84.615	0.90658	0.90949	1.0332	0.95654	0.94368	0.96994
DEPGAWEETFK	0	1307.57	IPI00383581;IPI00011454	IPI00383581	2	0.0024611	84.479	1.0058	0.86438	0.91981	0.96449	0.94377	1.0312
IISAERAVTGYK	0	1306.72	IPI00014898;IPI00186711;IPI00398002;IPI00398778;IPI00398777;IPI00398779;IPI00398775;IPI00420096;IPI00398776	IPI00014898	2	3.516e-28	226.04	0.96682	0.9216	0.94109	0.96753	0.94385	0.99586
YVIIRVHSAPRSGAPAAESK	0	2108.15	IPI00299977;IPI00513775	IPI00299977	3	1.4648e-05	103.01	1.0057	0.96571	0.93161	0.97141	0.94386	0.93565
KFYEAFSK	1	1018.51	IPI00414676;IPI00515119;IPI00640129;IPI00746291;IPI00555915	IPI00414676	2	0.016194	75.387	1.0183	0.86064	0.82802	0.81229	0.94388	1.1273
VNQIGSVTESIQACK	0	1632.81	IPI00465248;IPI00759806;IPI00218474;IPI00909949;IPI00942494	IPI00465248	2,3	1.6639e-85	294.97	0.93396	0.87865	0.94296	0.97162	0.9439	0.9412
GIAYIEFK	0	939.507	IPI00604620;IPI00444262;IPI00183526;IPI00916188	IPI00604620	1,2	3.2825e-05	150.4	1.0263	0.94114	0.91652	0.94432	0.94391	1.0583
VPAIYGVDTRMITK	0	1562.85	IPI00889534;IPI00011062	IPI00889534	2,3	7.8024e-15	170.79	0.9342	0.98025	1.056	0.97046	0.94422	0.95524
VEAFQTTISK	0	1122.59	IPI00943181;IPI00384051;IPI00746205	IPI00943181	2	0.025011	54.784	0.91316	1.5664	1.6124	1.1861	0.94428	0.78891
KINCQVIGASVDSHFCHIAWVNTPK	1	2880.42	IPI00000874;IPI00640741	IPI00000874	3,4	6.5404e-41	207.43	0.92958	1.0029	1.0318	1.0262	0.94437	0.8897
TIIARACAAQTK	0	1302.71	IPI00018398	IPI00018398	2	0.0013262	90.614	1.0576	0.8512	0.78577	0.79333	0.94441	1.2089
AGGVFTPGAAFSK	0	1208.62	IPI00329600;IPI00641681	IPI00329600	2	0.0021679	82.85	0.94684	0.89306	1.0155	0.81956	0.94441	1.1246
QAIIAAQRRGEDVETSK	0	1870.99	IPI00021570;IPI00640567;IPI00006362	IPI00021570	2,3	7.3548e-60	252.36	1.0093	1.002	1.0155	0.99872	0.94444	0.95251
IKPHIMSQEIPEDWDK	0	1964.97	IPI00010796;IPI00878551;IPI00879437	IPI00010796	2,3	5.2345e-47	241.8	0.93892	0.97018	1.0025	0.95886	0.94455	0.93939
KFDPMGQQTCSAHPARFSPDDK	1	2519.13	IPI00032853	IPI00032853	3	0.00010621	89.011	0.93751	0.88453	0.96384	1.0175	0.94474	0.82958
RTIEGEIHDIRGQVAK	0	1820.99	IPI00216952;IPI00021405;IPI00216953;IPI00644087;IPI00514320;IPI00514817;IPI00655812;IPI00965833;IPI00514204;IPI00910241;IPI00965567	IPI00216952	3	0.00022044	105.03	1.0281	0.9615	0.97328	0.92155	0.94475	1.0862
AKWDAWNEIK	1	1259.63	IPI00922055;IPI00921830;IPI00965476;IPI00218836;IPI00966070;IPI00815745;IPI00010182	IPI00922055	2	0.022267	84.605	0.97192	0.81284	0.8574	0.95641	0.94484	1.0024
KVENTRWDYITQVEK	1	1907.97	IPI00395627;IPI00552308;IPI00940004	IPI00395627	3	0.016488	67.019	1.0651	1.0305	1.0344	1.0421	0.94487	0.91382
KQPDEEPMDMVVEK	1	1673.76	IPI00477231;IPI00181391;IPI00941608;IPI00465449	IPI00477231	2	0.00038567	102.64	0.98429	1.0106	1.0838	0.94064	0.9449	1.0239
EAVREGRPPEPTPAK	0	1632.86	IPI00782992;IPI00785023	IPI00782992	3	0.00012367	107.46	0.86115	0.86495	0.99778	0.96181	0.94491	1.0177
IVFIGIDNAGK	0	1145.64	IPI00015954;IPI00002149;IPI00966157;IPI00968137;IPI00644667;IPI00964410	IPI00015954	2	2.4914e-05	136.96	0.996	0.90912	1.0142	0.99704	0.94499	0.94713
VIITSPIIRDEIEK	0	1624.94	IPI00169430;IPI00413860	IPI00169430	3	0.010179	68.034	1.0234	0.95437	0.97082	0.89328	0.945	1.041
ARPFPDGIAEDIDK	0	1542.77	IPI00186290;IPI00909570;IPI00440662	IPI00186290	2	1.9618e-10	160.84	0.96398	0.9145	0.9116	0.99728	0.94509	0.9536
SRFWYFVSQIK	0	1459.76	IPI00026202;IPI00872093;IPI00847774;IPI00909746	IPI00026202	2	1.5235e-17	140.91	1.0332	0.88634	0.79816	0.72825	0.94511	1.3091
GQICEISCSTDYRMR	0	1874.81	IPI00018522;IPI00382516;IPI00215734;IPI00914913	IPI00018522	2	1.2577e-08	121.24	1.0649	0.90237	0.83909	0.891	0.94511	0.95658
KIQEVDSIWK	1	1244.68	IPI00006379;IPI00917530	IPI00006379	2	0.0014902	108.35	0.94363	0.86755	1.025	0.95398	0.94517	1.1302
MEDSVGCIETAEEVK	0	1695.73	IPI00019502	IPI00019502	2	2.9487e-64	140.84	0.9979	0.90691	0.88658	0.87821	0.94518	1.06
ICDQWDNIGAITQK	0	1660.79	IPI00921118;IPI00759776;IPI00013508;IPI00909239	IPI00921118	2	7.8551e-32	217.48	0.90806	1.0186	1.0602	1.0205	0.94534	0.95996
ESGVDIAAGNMIVK	0	1402.71	IPI00025273;IPI00384624	IPI00025273	2	6.9424e-16	182.02	1.0177	0.90093	0.9234	0.91431	0.94538	1.0133
GVIIFGPPGTGK	0	1141.65	IPI00021435	IPI00021435	2	0.00075505	94.767	1.0035	0.96142	1.0107	0.9287	0.94541	1.0458
EISEYVRNQQTIGARK	0	1890.99	IPI00916503;IPI00916112;IPI00785096;IPI00918019;IPI00180128;IPI00903257	IPI00916503	3	0.014445	58.487	0.91545	0.9696	1.053	0.97259	0.94545	0.9119
ATIGADFITK	0	1035.56	IPI00016342;IPI00945574;IPI00945735;IPI00945337;IPI00946911;IPI00946776;IPI00945392;IPI00792578;IPI00791850;IPI00795370	IPI00016342	2	3.5783e-12	170.52	0.98616	1.0042	0.94019	0.97379	0.94545	0.96404
MHARDFTVSAMHGDMDQK	0	2075.9	IPI00025491;IPI00796657	IPI00025491	2,3	4.4307e-61	254.53	0.96581	1.0083	1.072	0.97334	0.94546	1.0053
APKPEDIDEEDDDVPDIVENFDEASK	0	2930.28	IPI00412792;IPI00844417	IPI00412792	3	2.7034e-32	188.44	0.99279	0.96331	0.98528	1.0275	0.94562	0.91425
DAIHFYNK	0	1006.49	IPI00013894;IPI00479946;IPI00908463	IPI00013894	2	0.029051	58.815	0.92799	0.8349	0.95751	0.921	0.9458	1.0464
FAYIGRIAHEVGWK	0	1645.87	IPI00304612;IPI00398983;IPI00398949	IPI00304612	2,3	3.4352e-32	225.13	0.97164	0.87269	0.97271	0.92422	0.9458	0.99547
FDVQFPENNWINPDK	0	1861.86	IPI00032406	IPI00032406	2	9.7604e-84	207.92	0.93577	0.96127	1.1043	0.91323	0.94585	1.0712
IQEMEGTVK	0	1033.51	IPI00019502;IPI00395772;IPI00742780	IPI00019502	2	0.00089763	119.22	0.97727	0.92166	0.87565	0.96616	0.94595	0.98162
IVIRIECVEPNCRSK	0	1871.97	IPI00220344;IPI00790743;IPI00968305;IPI00917181;IPI00056494	IPI00220344	3	1.1925e-06	135.81	0.96794	0.96232	1.0093	1.0363	0.94598	0.89993
FICTTSAIQNRFK	0	1584.81	IPI00394838;IPI00021290;IPI00939422;IPI00935456	IPI00394838	2	4.6671e-30	226.04	0.96121	0.92762	0.92764	0.8743	0.9461	1.0392
VMQQQQQTTQQQIPQK	0	1940.97	IPI00017451	IPI00017451	3	9.0766e-13	158.52	0.91816	0.96084	1.0606	1.0173	0.94613	0.94176
YSNSAIGHVNCTIK	0	1562.75	IPI00021766;IPI00894213;IPI00477663;IPI00478442;IPI00298289;IPI00969517;IPI00894099;IPI00219207;IPI00873380	IPI00021766	2	6.0591e-32	220.59	1.001	0.84373	0.81438	0.94056	0.94618	1.0925
VVVSHSTHRTFGK	0	1453.78	IPI00102069	IPI00102069	2,3	3.2712e-40	244.72	0.95068	0.90822	0.98482	1.0204	0.94629	0.90924
GPIMMYISK	0	1038.52	IPI00186290	IPI00186290	1,2	3.2533e-08	156.35	0.97082	0.93847	1.014	0.98397	0.94634	1.0511
ITAIDEFATK	0	1107.58	IPI00871535;IPI00879810;IPI00844215;IPI00843765	IPI00871535	2	0.059669	41.164	1.0074	1.0763	1.085	0.97615	0.94662	0.9994
VFQFINAK	0	965.533	IPI00793696;IPI00306332;IPI00946221;IPI00791426	IPI00793696	1,2	2.3159e-07	109.86	1.0195	0.931	0.94658	0.99566	0.94662	0.99937
AVPREEIFVTSK	0	1374.75	IPI00220271;IPI00647702	IPI00220271	2	1.2473e-08	148.68	1.1879	1.1345	1.0081	0.97394	0.94668	0.98556
YIDEDTIYHIQPSGRFVIGGPQGDAGITGRK	0	3359.69	IPI00010157;IPI00916229	IPI00010157	3,4	4.3347e-11	109.23	1.2022	1.1419	1.0271	1.0257	0.94669	0.92559
ERGDYVIAVK	0	1148.62	IPI00900293;IPI00289334;IPI00477536;IPI00943563;IPI00382697;IPI00953109;IPI00940093;IPI00945610	IPI00900293	2	0.061367	40.496	1.0759	0.9394	0.85343	0.97312	0.94672	1.0248
SPFSVAVSPSIDISK	0	1532.81	IPI00333541;IPI00302592;IPI00644576;IPI00553169	IPI00333541	2	9.9688e-10	144.8	1.1138	0.91819	0.80807	0.79366	0.94684	1.2119
TVNQQTMAAPVVK	0	1385.73	IPI00083708;IPI00739117;IPI00902898;IPI00852708;IPI00902809;IPI00941219;IPI00148247;IPI00946618;IPI00941970;IPI00902970	IPI00083708	2	4.8028e-06	135.14	1.1257	0.94522	0.84399	0.73877	0.94715	1.3086
VGGTSDVEVNEK	0	1232.59	IPI00784154;IPI00917575;IPI00880053	IPI00784154	2	1.1921e-08	149.41	1.009	0.92895	0.97064	0.96873	0.94733	0.99928
AIAVGGIGSIIRVITARK	0	1794.12	IPI00414554	IPI00414554	3	2.7769e-05	110.98	1.0038	0.97344	0.98943	0.97782	0.94742	0.91325
TIVNPANVTFK	0	1202.67	IPI00007321;IPI00398727;IPI00909991;IPI00797535	IPI00007321	2	0.00049111	111.52	1.0556	0.88108	0.75908	0.76427	0.94759	1.2338
MVEGFFDRGASIVEDK	0	1798.86	IPI00016801;IPI00027146	IPI00016801	2	7.3841e-13	161.24	1.0034	1.075	1.0539	0.96983	0.94763	0.95069
FEEFQNTISK	0	1241.59	IPI00470779	IPI00470779	2	2.3804e-07	169.52	0.92487	0.83389	0.93859	1.0227	0.94774	1.0449
IGGTCVNVGCVPK	0	1359.66	IPI00016862;IPI00953236;IPI00759575;IPI00953696;IPI00794573	IPI00016862	2	1.6456e-06	138.02	1.0963	0.94881	0.90146	0.91415	0.94784	1.0405
GIDVDSIVIEHIQVNK	0	1777.96	IPI00413324;IPI00644171;IPI00394699;IPI00874214;IPI00455067;IPI00844321	IPI00413324	2	6.312e-98	156.17	0.94058	1.1186	1.1225	1.2091	0.94786	0.80561
AIMGIYHGQVICK	0	1488.76	IPI00031522	IPI00031522	2,3	7.19e-22	196.88	0.95379	0.91162	0.95156	0.93519	0.94798	1.0386
GFFIIVEGGRIDHGHHEGK	0	2104.06	IPI00419916;IPI00956631;IPI00643764	IPI00419916	3	7.3028e-12	150.76	1.0595	0.88496	0.89831	0.92004	0.948	1.0763
MVPPVQVSPIIK	0	1306.77	IPI00218848	IPI00218848	2	0.0038474	75.819	0.96012	0.93241	0.98646	0.93838	0.9485	1.0144
AWEEYYK	0	987.434	IPI00479786;IPI00855957;IPI00641948;IPI00644386;IPI00853059;IPI00974019;IPI00375441	IPI00641948	1,2	0.0076011	82.671	0.95823	0.82651	0.87601	0.97779	0.94862	0.99291
IRSVVTPARVQFK	0	1499.89	IPI00027032;IPI00646978	IPI00027032	3	0.031525	53.567	0.97172	0.89005	0.93784	0.97855	0.94864	0.91163
AAATPESQEPQAK	0	1326.64	IPI00641181;IPI00936328;IPI00937223	IPI00641181	2,3	8.2049e-10	166.7	0.99965	0.96345	0.88278	0.93098	0.94866	0.96522
RISEQFTAMFRRK	0	1668.89	IPI00013475;IPI00031370;IPI00930715;IPI00974224;IPI00909140;IPI00645452;IPI00647896;IPI00953417;IPI00908770;IPI00007752;IPI00930130;IPI00013683;IPI00152453;IPI00640115;IPI00644620;IPI00023598;IPI00926685;IPI00956241	IPI00007752	2,3,4	0.00098927	92.295	0.97202	0.92767	1.0101	0.98494	0.94868	0.94764
EDPTAVACTFSCMMK	0	1746.71	IPI00783982;IPI00966036	IPI00783982	2	3.478e-07	142.97	0.95628	1.01	0.98069	0.96615	0.94881	0.98279
EIAVTVK	0	758.454	IPI00018465;IPI00552072;IPI00952607;IPI00952671	IPI00018465	2	0.016866	74.127	1.0123	0.89201	0.96418	1.0131	0.94886	0.92738
SPEDIERIIPHK	0	1432.77	IPI00910781;IPI00027497;IPI00908881	IPI00910781	2,3	0.00019681	111.86	1.1227	0.92839	0.88101	0.86262	0.94892	1.1102
AIYDTFSAFGNIISCK	0	1805.87	IPI00642904;IPI00012726;IPI00555747;IPI00642944;IPI00644016;IPI00008524;IPI00410017;IPI00796945;IPI00796139	IPI00008524	2,3	0.00019259	111.34	0.94212	0.96999	1.0201	1.0011	0.94896	0.97319
AAPCIYWIPITDSQIVQK	0	2102.09	IPI00007334;IPI00946415;IPI00911038;IPI00215975;IPI00297991	IPI00007334	3	3.4164e-20	177.38	0.95916	1.0329	1.1118	0.87057	0.94907	0.98928
IEFEGQPVDFVDPNK	0	1732.83	IPI00889534;IPI00011062	IPI00889534	2	2.2348e-16	185.14	0.96021	1.0175	1.06	1.0605	0.94918	0.88384
NCPHIVVGTPGRIIAIARNK	0	2185.23	IPI00641829;IPI00848161;IPI00792043;IPI00893580;IPI00790636;IPI00894161;IPI00643815;IPI00893920;IPI00892588;IPI00910878;IPI00796920;IPI00642800;IPI00910759;IPI00894545;IPI00893927;IPI00641634;IPI00893446	IPI00641829	3	0.064593	41.86	1.1295	1.1804	1.0716	1.0108	0.94919	1.0913
MPEMHFK	0	918.409	IPI00021812;IPI00555610	IPI00021812	2	0.011774	80.229	0.96552	0.95136	0.90332	0.88379	0.9492	1.0146
VGVSSRINEWITK	0	1487.81	IPI00014516;IPI00218694;IPI00925125;IPI00218695;IPI00218696;IPI00816770;IPI00333771	IPI00014516	2	0.0055775	73.386	1.0311	1.0242	1.0517	0.99314	0.94931	1.0182
IIVRFGSSK	0	1005.6	IPI00295400;IPI00412737	IPI00295400	2	0.00057403	112.71	1.0015	0.9194	0.93616	0.92721	0.94941	1.0236
IFIIRGSPQQIDHAK	0	1721.96	IPI00479786;IPI00855957	IPI00479786	2,3	2.7144e-32	220.85	0.90293	0.91174	1.0172	1.0178	0.94941	0.90211
ICINICVGESGDRITRAAK	0	2132.08	IPI00376798;IPI00746438;IPI00647674;IPI00647168	IPI00376798	3	9.5529e-05	99.451	1.1125	1.2109	1.0952	0.99023	0.94943	0.91903
KPITTGGVTYREQPWHK	0	1997.05	IPI00396967;IPI00743342	IPI00396967	3	0.0044233	72.898	0.9168	1.0032	1.1297	1.0382	0.94945	0.85671
DRESMGHRYIEVFK	0	1765.86	IPI00003881	IPI00003881	2	0.015659	60.157	0.98166	0.98727	0.96693	1.0502	0.94946	0.95622
EVPAVPETIK	0	1081.6	IPI00871827;IPI00472171;IPI00030179	IPI00871827	2	0.0057877	74.841	0.99365	0.96028	0.98721	0.99466	0.94958	1.002
ITFDTTFSPNTGK	0	1427.69	IPI00902560;IPI00216026;IPI00455531;IPI00024145;IPI00917420;IPI00647902;IPI00647442	IPI00902560	2	5.2863e-30	211.38	0.9978	0.88437	0.90005	0.97526	0.94964	0.97871
SVTEQGAEISNEERNIISVAYK	0	2436.21	IPI00021263;IPI00793388;IPI00790689	IPI00021263	2,3	3.1495e-87	235.84	1.031	0.81801	0.80135	0.87811	0.94973	1.059
RIAITDNAIIARSIGK	0	1711.01	IPI00871827;IPI00472171;IPI00030179;IPI00794746	IPI00871827	2,3	2.1367e-06	132.05	0.95059	0.96081	1.0133	0.93918	0.94975	1.0262
TAIAIAIAQEIGSK	0	1384.79	IPI00021187;IPI00788942;IPI00796459	IPI00021187	2	1.0461e-09	151.8	1.0649	0.91606	0.88847	0.78001	0.94979	1.2486
INPRIAIIYAK	0	1270.78	IPI00032826;IPI00793211;IPI00892521;IPI00168839	IPI00032826	2	3.7639e-19	205.09	0.97371	0.89721	0.91913	0.939	0.94983	1.0064
VNIVPVIAK	0	951.612	IPI00871851;IPI00014177;IPI00894340;IPI00893658;IPI00893645;IPI00894055	IPI00871851	2	0.010731	69.954	0.95313	0.93118	0.94433	0.94079	0.94985	0.94689
VIGQPHHEIDSK	0	1358.69	IPI00073713;IPI00910884;IPI00792475;IPI00167806;IPI00798190	IPI00073713	2,3	9.3474e-05	98.902	1.0122	0.99628	0.94963	1.1676	0.94996	0.89076
FIASTGMDRSIK	0	1324.68	IPI00004968	IPI00004968	2,3	1.0386e-27	209.19	1.0036	0.89995	0.8502	0.93439	0.95002	0.94742
IGQQPQQPGAPPQQDYTK	0	1979.97	IPI00479786;IPI00855957	IPI00479786	3	0.00052391	85.734	0.89396	1.0488	1.0911	1.0278	0.95004	0.98096
ITDISVTDPEK	0	1216.62	IPI00032460	IPI00032460	2	0.00092182	98.156	1.03	0.91723	0.86822	0.94761	0.95008	1.0586
NAAGAIDIIK	0	984.56	IPI00333215;IPI00922871;IPI00974396;IPI00974100	IPI00333215	2	0.00019952	118.28	1.018	0.9473	0.90027	0.81609	0.95018	1.1277
IFSGSSHQDISQK	0	1432.69	IPI00219616;IPI00218371;IPI00643000	IPI00219616	2,3	3.0344e-40	232.5	0.91695	0.90443	0.95281	0.9179	0.95022	0.98716
RIAPEYEAAATRIK	0	1587.87	IPI00025252;IPI00847663;IPI00790740;IPI00893541	IPI00025252	2,3	6.8515e-23	196.67	0.97581	0.93349	0.98121	1.0643	0.95023	0.95256
YRGMGSIDAMDK	0	1342.6	IPI00291510;IPI00925196;IPI00795143	IPI00291510	2	2.8914e-06	139.48	1.0847	1.0196	0.95589	0.8749	0.95024	0.97122
VDIVIIGK	0	855.543	IPI00004902;IPI00556451	IPI00004902	2	0.012866	72.485	1.016	0.93569	0.99196	1.0029	0.95024	0.99244
AVAISIPK	0	797.501	IPI00032140;IPI00910487	IPI00032140	2	0.00098083	103.56	1.0231	0.92888	0.93689	0.94049	0.95029	1.0258
SIVASIAEPDFVVTDFAK	0	1907.99	IPI00645078	IPI00645078	2	4.124e-14	157.54	1.1603	0.95842	0.82087	0.80105	0.95032	1.0908
RITSPIMEPSSIEK	0	1586.83	IPI00291922	IPI00291922	2	8.249e-15	169.94	0.97439	0.98876	1.0006	0.98746	0.95039	0.98359
TGIEQGSDAGYICESQK	0	1841.81	IPI00031522	IPI00031522	2	3.559e-36	221.13	1.0847	0.93358	0.82572	0.71114	0.9504	1.2628
VDEAVAVIQAHQAK	0	1477.79	IPI00008524;IPI00410017;IPI00796945;IPI00909378;IPI00301154	IPI00008524	2,3	1.7221e-40	229.97	0.9718	0.92655	0.95117	0.97308	0.95045	1.0132
AEGPEVDVNIPK	0	1266.65	IPI00021812;IPI00555610	IPI00021812	2	1.4723e-19	186.58	1.0177	0.87989	0.88204	0.93254	0.95065	1.0283
GVQVETISPGDGRTFPK	0	1786.92	IPI00759644	IPI00759644	2,3	1.0917e-42	226.74	0.93037	1.0061	1.0427	0.94868	0.95078	0.97315
ETGVPIAGRHAVVVGRSK	0	1832.04	IPI00218342;IPI00794900	IPI00218342	3	0.0002641	95.067	0.98508	0.86411	0.92785	0.94325	0.95079	1.0419
FVMKPPQVVRVGTK	0	1584.92	IPI00021728;IPI00176637	IPI00021728	3	0.0014075	88.021	0.92351	0.91089	0.96266	0.93459	0.95089	1.0177
IDSTDFTGTIK	0	1196.59	IPI00022462;IPI00924935	IPI00022462	2	0.00053255	109.24	0.91875	0.81141	0.90674	0.89306	0.9509	1.0247
GVPAGNSDTEGGQPGRK	0	1625.78	IPI00007334;IPI00946415;IPI00911038;IPI00215975;IPI00297991	IPI00007334	3	0.047462	48.823	0.85017	0.88171	1.1296	1.0391	0.95097	0.87016
FANRVVVTK	0	1032.61	IPI00031556;IPI00830039	IPI00031556	2	8.9041e-05	131.44	0.88033	0.88671	0.99382	0.81277	0.95105	1.0872
VIQRNCAAYIK	0	1334.71	IPI00019502;IPI00395772;IPI00873982;IPI00790503;IPI00479307;IPI00743857;IPI00397526;IPI00020501;IPI00744256;IPI00024870	IPI00019502	2	0.00067476	101.38	0.86297	0.86741	0.93443	0.99664	0.95106	0.86601
AAVEDSGTTVETIK	0	1419.71	IPI00251559;IPI00947211;IPI00946858;IPI00945996	IPI00251559	2	2.2559e-10	159	0.94308	0.94479	0.97943	0.98291	0.95125	0.9243
SIESIDTSIFAK	0	1309.68	IPI00029764;IPI00908449	IPI00029764	2	1.3949e-94	188.91	1.003	0.88829	0.91328	0.86495	0.95135	1.1416
RIIGYVATIK	0	1132.7	IPI00844264;IPI00973794;IPI00470891;IPI00873244	IPI00844264	2	9.811e-06	137.89	1.146	0.95019	0.89828	0.99265	0.95138	0.96042
VTNIIMIK	0	930.557	IPI00183626;IPI00334175;IPI00179964;IPI00556157;IPI00915400;IPI00915287;IPI00915299;IPI00254162;IPI00384710;IPI00641664;IPI00647067;IPI00514064;IPI00159072;IPI00470879;IPI00743676;IPI00748295;IPI00556141	IPI00183626	2	0.001492	108.98	1.0261	0.97548	0.96072	0.98542	0.95163	1.0144
IEARINVIEK	0	1183.69	IPI00642971;IPI00789435;IPI00023048;IPI00796284;IPI00064086;IPI00795920	IPI00642971	2	0.0010067	99.568	1.0253	0.86122	0.94254	0.99775	0.95163	0.94426
GYDVIAQAQSGTGK	0	1393.68	IPI00025491;IPI00910691;IPI00927069;IPI00409717;IPI00328328;IPI00924536;IPI00793328;IPI00790077;IPI00792676	IPI00025491	2	5.4985e-69	272.72	0.98199	0.92888	0.9518	0.98168	0.95171	1.0128
IIFPERIDPNPADSQK	0	1838.95	IPI00745568	IPI00745568	3	0.0011007	92.935	0.91832	1.047	1.0721	1.0094	0.95176	0.96917
GAVAIADAIRGGIPK	0	1407.82	IPI00294879;IPI00879681	IPI00294879	2,3	5.7674e-41	234.85	0.95457	0.95862	0.9605	0.97687	0.95179	0.99432
VIIIGDSGVGK	0	1056.62	IPI00016342;IPI00945574;IPI00945735;IPI00945337;IPI00946911;IPI00946776;IPI00945392;IPI00792578;IPI00791850;IPI00795370	IPI00016342	2	0.00057203	107.06	0.96865	0.98417	1.011	1.0688	0.95191	0.90898
AAISEEEIEK	0	1117.55	IPI00956559;IPI00479262;IPI00552639;IPI00924828;IPI00955980;IPI00927510;IPI00759560;IPI00927765;IPI00798400;IPI00386533;IPI00442069	IPI00956559	2	3.114e-16	205.53	0.96967	0.91249	0.90428	1.0462	0.95199	0.89226
NIQYYDISAK	0	1213.6	IPI00792352;IPI00796462;IPI00795671;IPI00643041;IPI00795109	IPI00792352	2	4.3858e-12	167.12	1.132	1.1621	0.9806	0.89231	0.95239	1.1382
TKPDDDISSK	0	1104.53	IPI00175416;IPI00783616	IPI00175416	2	0.0678	37.968	1.023	0.9437	0.9287	0.97641	0.95246	1.0186
VDATAETDIAK	0	1132.56	IPI00009904;IPI00852792	IPI00009904	2	0.00039699	116.54	1.023	0.9437	0.9287	0.97641	0.95246	1.0186
AQAIRDNSTMGYMMAK	0	1786.82	IPI00414676;IPI00555614	IPI00414676	2,3	7.4281e-75	285.43	0.99397	0.97268	1.0226	0.98639	0.95257	0.99131
ITPQGQRDIDRIAGQVAAANK	0	2221.19	IPI00215780	IPI00215780	3	5.5697e-29	133.78	1.0227	1.0644	0.99847	1.0539	0.95259	1.0045
AQGPAASAEEPKPVEAPAANSDQTVTVKE	1	2891.41	IPI00299024;IPI00908521	IPI00299024	3,4	1.8695e-59	220.69	0.96556	0.98039	0.9868	0.99487	0.95263	1.054
FIRHQSDRYVK	0	1447.77	IPI00927658;IPI00395998;IPI00927458;IPI00794734;IPI00927895;IPI00926827;IPI00176451;IPI00797690	IPI00927658	2,3	0.00038705	117.02	1.041	0.90363	0.93159	0.80853	0.9527	1.1401
RAAAEVNQDYGIDPK	0	1645.81	IPI00296053;IPI00759715	IPI00296053	2	0.026293	54.598	1.0176	0.94622	0.9624	0.94898	0.95283	0.99609
NNIPYFETSAK	0	1282.62	IPI00016342;IPI00945574;IPI00945337;IPI00946911	IPI00016342	2	0.00030783	112.13	1.1373	0.86548	0.68666	0.80656	0.95287	1.3001
DMDEPSPVPNVEEVTIPK	0	1994.95	IPI00216047;IPI00150057	IPI00216047	2	2.0592e-20	183.36	0.94855	0.87652	0.88033	0.92326	0.95297	1.1113
INIAFVANIFNK	0	1362.77	IPI00216694;IPI00947227;IPI00947454	IPI00216694	2	1.2251e-13	181.68	1.0112	0.8904	0.915	0.98423	0.95311	0.9543
AFGPGIQGGSAGSPARFTIDTK	0	2134.08	IPI00333541;IPI00302592;IPI00644576;IPI00553169	IPI00333541	2,3	5.372e-13	160.13	0.99757	0.99773	1.0252	1.1086	0.95335	0.92483
QIMVHAFIK	0	1085.61	IPI00219604;IPI00797850	IPI00219604	2	2.3604e-06	166.52	0.99601	0.85059	0.88956	0.87443	0.95345	1.0867
KFVIKPIDK	1	1086.68	IPI00219365;IPI00384282;IPI00843975;IPI00872684;IPI00017367;IPI00903145	IPI00219365	2,3	0.0098804	79.974	1.1703	0.98356	0.86676	0.74034	0.95356	1.2424
MSIPDVDIDIK	0	1244.63	IPI00021812;IPI00555610	IPI00021812	2	3.7105e-08	150.94	1.0083	0.98048	1.0183	0.9587	0.95359	1.0273
AIHYAINCCGIAGGVEQFISDICPK	0	2792.31	IPI00215997;IPI00657796;IPI00795937	IPI00215997	3	3.5086e-17	142.85	1.0253	0.9987	0.87602	0.72173	0.95362	1.3154
GAVVAGSRGYFIK	0	1323.73	IPI00514587;IPI00220637	IPI00514587	2	0.0051643	73.881	0.98521	0.94117	0.84471	0.89444	0.95365	1.0803
TRIIDVVYNASNNEIVRTK	0	2204.19	IPI00216587;IPI00645201	IPI00216587	2,3	6.8349e-07	126.4	1.0705	0.97479	0.99042	0.93473	0.95369	1.0178
IISGGSVIDIIK	0	1213.73	IPI00010080;IPI00924637	IPI00010080	2	0.00059378	96.64	1.0151	0.9606	1.0127	1.0035	0.95385	0.91237
KGPQVRDWSHYFK	1	1646.83	IPI00554788;IPI00942338;IPI00794267	IPI00554788	2,3,4	9.8311e-10	152.16	0.96166	0.92003	0.97608	0.94112	0.95405	0.99407
IITTNTWSSEISK	0	1478.76	IPI00031420;IPI00956601;IPI00964927	IPI00031420	2	7.7001e-52	257.02	0.93607	1.0107	1.0601	1.0794	0.95406	0.93008
KQEIIEAITK	1	1171.68	IPI00644712;IPI00893062;IPI00889791	IPI00644712	2	0.0027099	91.313	1.101	1.0204	0.88991	0.89735	0.95412	1.0961
EGIEIIK	0	800.464	IPI00465248;IPI00759806	IPI00465248	2	0.00014787	123.69	1.0407	0.92109	0.92007	0.91417	0.95414	1.1097
IMNESIMIVTAINPHIGYDK	0	2258.14	IPI00296053;IPI00759715	IPI00296053	3	1.4641e-05	109.03	0.92456	0.95255	0.99312	0.99608	0.95428	0.88896
GTDSQAMEEEKPEGHV	0	1742.74	IPI00218775	IPI00218775	2	9.52e-47	234.77	0.94359	0.82224	0.92169	0.94052	0.9543	1.0389
IVFPQDIIEK	0	1200.68	IPI00220687;IPI00152441;IPI00552772;IPI00329296	IPI00220687	2	0.003689	81.865	1.0122	0.96904	0.97077	1.0304	0.95433	0.97886
VWRDQHFVK	0	1213.64	IPI00022462;IPI00924935	IPI00022462	2	0.0010552	114.97	0.96666	1.0458	0.94153	0.98194	0.95444	0.89691
AFAVGVQQVIIK	0	1271.76	IPI00007402	IPI00007402	2	1.8444e-13	175.15	0.91322	0.94099	1.0153	0.9968	0.95451	0.96625
AQIHDIVIVGGSTRIPK	0	1803.04	IPI00304925;IPI00845339;IPI00911039	IPI00304925	2,3	7.4859e-60	252.05	0.98461	0.94957	0.929	0.9969	0.95451	0.95614
GMADRIIGMRTQIVSNIK	0	2002.08	IPI00910267	IPI00910267	3	0.00077822	87.647	0.97087	0.91174	0.94134	1.0411	0.95463	0.9502
IIVIDRIIEIK	0	1323.85	IPI00295851	IPI00295851	2	4.089e-08	149.49	1.0679	0.95396	0.93517	1.0107	0.95471	0.95669
ENISYDIVPIK	0	1289.69	IPI00514983;IPI00939163;IPI00513743;IPI00218993;IPI00910755	IPI00514983	2	7.8609e-05	122.34	1.0512	0.95625	0.93198	0.8745	0.95494	1.0535
NIVQEWIAK	0	1099.6	IPI00007289;IPI00290380;IPI00298622	IPI00007289	2	0.00095738	101.97	1.0722	1.017	0.92952	0.84584	0.95499	1.2676
TNHIGHTGYINTVTVSPDGSICASGGK	0	2742.3	IPI00848226;IPI00964877;IPI00965459;IPI00964790;IPI00966111;IPI00967792;IPI00967322;IPI00967577;IPI00966041;IPI00967345;IPI00964313;IPI00964025;IPI00910724	IPI00848226	3	9.0908e-29	154.1	1.2259	0.90788	0.62764	0.67931	0.95502	1.4147
ETAENYIGHTAK	0	1332.63	IPI00007765;IPI00922694	IPI00007765	2,3	3.6235e-27	213.18	1.0045	0.99219	0.9766	0.92499	0.95511	1.0059
MDIDVPDVEVQGPDWHIK	0	2091.99	IPI00021812;IPI00555610	IPI00021812	3	2.4113e-14	164.01	0.94588	1.0841	1.1333	0.95093	0.95514	1.0744
AIRYPMAVGINK	0	1331.74	IPI00216237	IPI00216237	2,3	8.9168e-28	219.03	1.0258	0.99517	0.95639	0.95309	0.9552	1.0217
VAHAIAEGIGVIACIGEK	0	1806.97	IPI00465028;IPI00797270;IPI00796633;IPI00451401	IPI00465028	2,3	3.7221e-61	256.96	0.98014	0.99587	1.0269	1.0088	0.95522	1.0148
ITVPGNFQGHSGAQCITCSYK	0	2324.07	IPI00005154	IPI00005154	3	1.6222e-09	132.14	0.91657	1.0662	1.2392	1.0574	0.95527	0.897
VDIQTEDIEDGTCK	0	1621.71	IPI00900293;IPI00289334;IPI00477536;IPI00943563;IPI00382697;IPI00953109;IPI00940093;IPI00945610;IPI00382698;IPI00382699;IPI00798140	IPI00900293	2	1.5298e-23	208.39	0.99002	1.0111	0.98396	0.90607	0.95531	0.8976
IFPDTPIAIDANK	0	1413.75	IPI00418313;IPI00298788;IPI00414335;IPI00556173;IPI00298789;IPI00219330	IPI00418313	2	0.0004881	99.531	0.94575	0.90463	0.98154	0.9955	0.95533	0.95164
VGIPPIEK	0	851.512	IPI00022793;IPI00893108	IPI00022793	2	0.014627	73.248	0.96771	0.90612	0.94988	1.024	0.95536	1.0243
GDYHRYIAEFATGNDRK	0	2011.95	IPI00000816;IPI00974544;IPI00793344	IPI00000816	3	0.00078177	86.548	1.1424	0.97059	0.81339	0.828	0.95538	1.2408
QPVFGANYIK	0	1135.6	IPI00032050;IPI00797202;IPI00789465;IPI00909894;IPI00797789;IPI00910281	IPI00032050	2	0.0015588	93.649	1.0069	1.2113	1.36	0.99738	0.95548	1.0388
RTPFGAYGGIIK	0	1278.71	IPI00001539	IPI00001539	2	0.00047922	103.43	0.98986	0.97104	0.95236	0.93964	0.95556	1.0351
AQVARPGGDTIFGK	0	1415.75	IPI00239077;IPI00967474;IPI00967744;IPI00968242;IPI00966135	IPI00239077	2,3	5.5067e-15	175.15	1.0374	0.9558	0.9631	1.0564	0.95569	0.93369
FMQASEDIIK	0	1180.58	IPI00604590;IPI00795292;IPI00790982;IPI00375531;IPI00012048	IPI00604590	2	1.8808e-18	199.68	1.1712	1.0907	0.95709	0.98117	0.95574	1.0339
IGIETVGVK	0	914.544	IPI00884896;IPI00885213;IPI00783641;IPI00847482;IPI00871867;IPI00973082;IPI00554786;IPI00967892	IPI00884896	2	0.0038089	82.287	0.94747	0.9372	1.0427	1.0143	0.95574	1.0385
MGGEEKPIGAGEEK	0	1430.67	IPI00329633;IPI00908949;IPI00967989;IPI00966149;IPI00966670;IPI00965253;IPI00965896;IPI00965598	IPI00329633	2	5.6084e-16	184.02	1.1269	0.8979	0.88078	0.80968	0.95582	1.2319
KFDQIIAEEK	1	1219.64	IPI00019502;IPI00395772;IPI00873982;IPI00790503;IPI00479307;IPI00743857;IPI00397526;IPI00020501;IPI00744256;IPI00024870;IPI00926581;IPI00941217;IPI00607818;IPI00337335	IPI00019502	2	0.0016306	98.898	1.0528	0.96098	0.89367	0.86309	0.95587	1.1228
AVIFCISEDKK	1	1308.67	IPI00012011;IPI00909841	IPI00012011	2,3	2.1701e-26	214.82	1.0613	1.0126	0.92805	0.89822	0.95595	0.95802
IRENVFQEHQTIK	0	1640.86	IPI00029601;IPI00062884;IPI00746806;IPI00791680	IPI00029601	3	2.8091e-10	159.5	0.99783	0.95711	0.96753	1.0959	0.95602	0.91874
DSVVAGFQWATK	0	1307.65	IPI00186290;IPI00909570;IPI00440662	IPI00186290	2	5.3356e-09	158.11	0.99684	1.0189	0.9958	0.95283	0.95607	1.0148
NVPYVFVRSK	0	1207.67	IPI00893746;IPI00026167	IPI00893746	2	0.002779	87.568	1.0574	0.90631	0.85474	0.80587	0.95613	1.223
QIIVANAGDSRCVVSEAGK	0	1973	IPI00006167;IPI00746326	IPI00006167	2	2.6369e-107	319.29	0.90513	1.0068	1.123	1.0198	0.95618	0.9704
DHASIQMNVAEVDK	0	1555.73	IPI00017448;IPI00937239;IPI00387084	IPI00017448	2	6.8515e-23	196.67	1.0162	0.93696	0.87769	0.94737	0.95622	1.0287
VVAVDCGIK	0	959.511	IPI00889534;IPI00011062	IPI00889534	2	0.0020654	92.838	0.94593	1.0002	1.0293	1.0599	0.95628	0.97219
ICDQWDAIGSITHSRREAIEK	0	2484.22	IPI00013808;IPI00969112;IPI00845465	IPI00013808	3	0.0023487	69.422	0.88103	1.1491	1.3316	1.1257	0.95636	0.88979
SSPVDIVTATDQK	0	1359.69	IPI00921428;IPI00020906;IPI00974011;IPI00974104;IPI00791997;IPI00974167;IPI00974217;IPI00790217	IPI00921428	2	0.0028882	77.078	0.52164	1.0033	2.1608	0.67759	0.95639	1.4056
GEPAAAAAPEAGASPVEK	0	1621.79	IPI00219301	IPI00219301	2,3	2.6846e-16	166.52	0.99559	0.87895	0.8762	0.97626	0.95642	0.92475
AFMCRFEAIEK	0	1400.66	IPI00246975	IPI00246975	2	2.654e-19	196.24	0.96399	0.88689	0.93031	1.0086	0.95647	0.94379
VVPCIVTPVTGRENSTAK	0	1927.02	IPI00900293;IPI00289334;IPI00477536;IPI00943563;IPI00382697;IPI00953109;IPI00940093;IPI00945610;IPI00382698;IPI00382699	IPI00900293	3	0.00078019	82.925	0.94878	1.0159	1.0933	1.0135	0.95648	0.98752
IIQDFFDGRDINK	0	1579.8	IPI00911039	IPI00911039	2,3	1.7668e-65	272.5	0.99003	1.0007	0.97158	0.99455	0.95666	0.97834
EVPIHRVADISGDTQK	0	1763.92	IPI00140420;IPI00910438;IPI00945024	IPI00140420	2,3	1.3104e-26	203.2	1.024	0.96096	0.97876	1.0531	0.95667	0.97036
ITIIDPETIIPRIK	0	1620.98	IPI00100160;IPI00604431	IPI00100160	3	2.4097e-10	158.04	0.99853	1.0419	0.99976	0.99005	0.95694	0.97189
IGQGYIIK	0	890.523	IPI00550021;IPI00651660;IPI00877635;IPI00877787	IPI00550021	2	0.017448	94.114	0.95581	0.93239	0.9913	1.015	0.95697	0.98765
IIFVVGGPGSGK	0	1129.65	IPI00640817;IPI00018342	IPI00640817	2	0.00123	91.313	0.95723	0.90875	0.94743	0.90619	0.95704	1.0359
AGVNFSEFTGVWK	0	1440.7	IPI00025277;IPI00930049;IPI00966206	IPI00025277	2	7.3355e-16	183.96	0.99823	0.96588	0.99462	1.0217	0.95707	0.96472
GDGPVQGIINFEQK	0	1500.76	IPI00218733	IPI00218733	2	4.2603e-32	223.7	0.95018	0.95927	0.99174	0.94325	0.95713	1.0183
IAIFQAIGK	0	959.58	IPI00010951	IPI00010951	2	0.00055033	109.11	0.99208	0.97373	0.95977	1.0415	0.95725	1.013
QSIPPGIAVK	0	1008.6	IPI00215790	IPI00215790	2	0.0021262	91.658	1.0797	0.87118	0.87596	0.92634	0.95733	1.0153
AYAQQIADWARK	0	1419.73	IPI00329572;IPI00909672	IPI00329572	2	0.0010178	92.856	0.73768	0.77265	1.0121	1.0206	0.95733	0.91783
EIVAIMSAIRDGETPDPEDPSRK	0	2525.24	IPI00219077;IPI00514090;IPI00793812;IPI00794758;IPI00790872	IPI00219077	3	8.8356e-14	141.64	0.87643	1.0653	1.2623	1.1801	0.95733	0.84516
VTEGITDVIIYHQPDDK	0	1941.97	IPI00018140;IPI00402183;IPI00930205;IPI00402182;IPI00402184;IPI00402185	IPI00018140	2,3	1.8298e-36	225.96	0.93843	0.9607	0.99408	1.0469	0.95738	0.89756
AINPINTFTK	0	1117.61	IPI00020567	IPI00020567	2	0.015777	61.353	0.97827	0.95467	0.9847	0.95847	0.95739	0.96089
QIQAETEPIVK	0	1254.68	IPI00013068;IPI00796161	IPI00013068	2	0.00020866	117.25	0.97779	0.97766	0.93981	0.9086	0.95742	1.105
VNPIQGIASK	0	1025.59	IPI00006579	IPI00006579	2	0.014489	61.353	1.0784	0.98623	0.89295	1.0051	0.95753	1.0356
THMVVANTMEDFQK	0	1649.75	IPI00013452	IPI00013452	2	6.5156e-11	169.04	1.0448	0.90993	0.83668	0.74422	0.95754	1.1606
IISSDRNPPIDDIIK	0	1694.92	IPI00012578;IPI00299033	IPI00012578	2	9.59e-05	114.31	0.98318	1.017	0.95759	1.0047	0.9576	0.98986
AVSRSAEQQPSEK	0	1415.7	IPI00761160;IPI00761140;IPI00760715;IPI00968085;IPI00305750;IPI00220857;IPI00964032;IPI00413492;IPI00921920;IPI00761035;IPI00761069;IPI00964761;IPI00966074;IPI00967304;IPI00973916;IPI00964778;IPI00965942;IPI00922832;IPI00973910;IPI00967889;IPI00967353	IPI00761160	2	6.2695e-05	115.06	0.8745	0.78941	0.9455	0.86952	0.9577	1.0497
AVIFCISADKK	1	1250.67	IPI00473014;IPI00845388	IPI00473014	2	7.596e-06	150.46	0.98332	0.91279	0.92784	0.88236	0.95772	1.0229
IDTIEIITDRQSGK	0	1587.85	IPI00396378;IPI00916517;IPI00414696	IPI00396378	2,3	1.3408e-52	255.85	1.0153	0.975	0.95985	1.0147	0.95772	1.025
IMHQAAIIGQAIQDSRNYGWK	0	2399.22	IPI00884896;IPI00885213;IPI00783641;IPI00847482;IPI00871867;IPI00973082;IPI00554786;IPI00967892	IPI00884896	2,3	0	261.63	1.0551	1.0601	0.97437	0.867	0.95781	1.1169
TIAQGNISNTDVQAAK	0	1629.83	IPI00305383	IPI00305383	2	7.6155e-47	237.89	1.0883	0.94141	0.81918	0.80588	0.95802	1.2446
AASHRAIDDISESIK	0	1611.82	IPI00032830;IPI00217330	IPI00032830	2	1.7862e-23	203.2	1.0205	0.89664	0.89401	0.9587	0.95803	1.0317
AIADTGANVVVTGGK	0	1371.74	IPI00784090;IPI00302925;IPI00797206	IPI00784090	2	2.6328e-23	199.15	0.74374	0.75006	0.99457	0.93427	0.95813	1.0007
EWMPVTK	0	889.437	IPI00013485;IPI00165486;IPI00386445;IPI00955904	IPI00013485	2	0.0050884	89.55	1.0263	1.0672	0.94044	0.96227	0.95817	1.0159
GFTAAGVIAAHK	0	1141.62	IPI00550882;IPI00941557;IPI00793698;IPI00376503;IPI00260769;IPI00922289;IPI00930393	IPI00550882	2	5.9439e-09	164.9	1.0808	0.94542	0.88607	0.82906	0.9582	1.1491
FVQCPDGEIQK	0	1319.62	IPI00009104	IPI00009104	2	1.2477e-12	167.18	0.98041	0.99947	0.95575	1.0069	0.95823	1.0029
SAETRESTQISPADITEGKPTDPSK	0	2644.28	IPI00306369;IPI00966877	IPI00306369	3	2.2373e-08	98.957	1.1696	0.98246	0.86818	1.0815	0.95826	0.98443
TVPEEIVKPEEISK	0	1596.86	IPI00004968	IPI00004968	2,3	3.0396e-07	149.3	1.1252	0.9172	0.84967	0.76883	0.95828	1.2973
GGIMIPEK	0	843.452	IPI00220362;IPI00916763;IPI00414878;IPI00938042	IPI00220362	2	0.0021749	101.64	1.0064	0.8604	0.82871	0.93572	0.95835	1.0478
WGDAGAEYVVESTGVFTTMEK	0	2276.03	IPI00219018;IPI00795257;IPI00789134;IPI00788737;IPI00797221;IPI00795622;IPI00794605	IPI00219018	2,3	9.477e-18	158.92	0.92952	0.98744	0.96231	0.98246	0.95845	1.0171
NAIANASTIAEVERIK	0	1698.93	IPI00297477	IPI00297477	2	1.5601e-08	145.86	1.297	1.0539	0.83123	1.0801	0.95849	0.86079
DHYEATAMHRAAAK	0	1570.73	IPI00003565;IPI00027699;IPI00552190;IPI00183104;IPI00647839	IPI00003565	2	0.0003003	106.32	0.99372	0.98491	0.95889	0.91022	0.95853	0.94814
DDAMAAVPAK	0	987.47	IPI00852685;IPI00936125;IPI00973154;IPI00935307;IPI00924442;IPI00884341;IPI00936881	IPI00852685	2	7.7572e-80	182.39	1.0946	0.91577	0.82805	0.85439	0.95857	1.1265
FENIGIQPPK	0	1141.61	IPI00018398	IPI00018398	2	0.00049725	107.83	1.1669	0.90348	0.93462	0.88825	0.95868	1.0217
IIINACCPGWVRTDMAGPK	0	2158.05	IPI00295386	IPI00295386	3	4.4283e-10	141.85	0.92194	1.0098	1.0928	1.0369	0.95874	0.92194
VAQPTITDNK	0	1085.57	IPI00333541;IPI00302592;IPI00644576;IPI00553169;IPI00910863;IPI00552416	IPI00333541	2	5.0037e-26	219.03	0.96842	0.87421	0.97379	1.0345	0.9588	0.89142
GMTIVTPIQIIIFASK	0	1731	IPI00844578	IPI00844578	2	1.7219e-07	139.88	0.95584	0.93087	0.99861	0.96533	0.95889	1.0072
IAEQFPRQVIDSK	0	1529.82	IPI00412792;IPI00844417	IPI00412792	2	1.8005e-09	160.48	0.98549	0.95188	0.94611	1.0099	0.95896	0.91888
GIVIIEEIIPK	0	1222.75	IPI00007052	IPI00007052	2	1.1321e-05	146.16	1.0096	1.0084	1.0122	1.012	0.95899	0.98147
IPGIIGVFQK	0	1070.65	IPI00022744;IPI00219994;IPI00910737;IPI00910298	IPI00022744	2	0.025459	54.608	1.0211	1.0257	1.0123	1.0497	0.95917	0.9346
DIQDEIAGNSEQRK	0	1601.76	IPI00219420	IPI00219420	2	1.9871e-10	160.69	1.0024	1.1408	1.0804	0.94809	0.95918	0.98512
EQISDIDDAVRKI	1	1500.78	IPI00221222;IPI00930562	IPI00221222	2,3	1.3345e-40	242.8	0.976	0.94214	0.9626	0.95711	0.95922	1.0185
VVIQEIRRIMMSK	0	1601.91	IPI00397947;IPI00890717;IPI00019599;IPI00030962;IPI00472498;IPI00019600;IPI00514724;IPI00789287;IPI00447356;IPI00007847;IPI00872898	IPI00397947	2,3	1.1278e-06	132.59	0.96336	0.9629	0.97049	1.0199	0.95929	0.9418
KITIADCGQIE	1	1246.62	IPI00419585;IPI00910407	IPI00419585	2	9.331e-19	200.93	0.93961	0.9733	1.0302	1.008	0.95938	0.93583
KVTHAVVTVPAYFNDAQRQATK	1	2443.3	IPI00003362	IPI00003362	3,4	1.1751e-34	199.99	0.924	1.047	1.1711	1.0169	0.95941	0.94834
ASAQASIASK	0	932.493	IPI00006213;IPI00795923;IPI00953308;IPI00941597	IPI00006213	2	0.0010396	99.215	1.1905	0.939	0.87459	0.90777	0.95943	1.1478
AIAAAGYDVEK	0	1106.56	IPI00217465;IPI00217466;IPI00217467;IPI00419983;IPI00217469	IPI00217465	2	1.1361e-08	168.3	0.93489	0.93018	0.98129	0.92266	0.95949	1.1018
GIVDQSQQAYQEAFEISKK	1	2168.07	IPI00021263;IPI00789337	IPI00021263	2,3	1.6943e-45	228.85	0.80844	0.97874	1.1661	1.1442	0.95958	0.87746
TEVNSGFFYK	0	1190.56	IPI00027626;IPI00552590;IPI00910226;IPI00220656	IPI00027626	2	0.0046836	76.332	1.1349	0.87153	0.73513	0.74492	0.95959	1.2233
KIGQQPQQPGAPPQQDYTK	1	2108.07	IPI00479786;IPI00855957	IPI00479786	3	3.2503e-11	153.22	0.97837	0.95234	1.0275	1.0108	0.95961	0.96065
EIAMPGEDIK	0	1101.54	IPI00027107	IPI00027107	2	0.015464	84.658	1.0954	1.0484	0.94711	1.027	0.95964	0.96249
GYTNWAIGISVADIIESMIK	0	2180.12	IPI00219217;IPI00556477	IPI00219217	3	2.0845e-10	137.45	0.76561	0.91764	2.1072	1.0347	0.95983	1.0016
GYPEVAIHFVK	0	1258.67	IPI00646493;IPI00295857	IPI00646493	2	8.3207e-05	131.82	0.982	0.8572	0.86284	1.0365	0.96	0.88915
GYGFVHFETQEAAERAIEK	0	2181.05	IPI00008524;IPI00410017;IPI00796945;IPI00909378	IPI00008524	3	1.0469e-07	133.25	1.0061	0.89526	0.86355	0.86075	0.9601	1.0905
DCGATWVVIGHSERRHVFGESDEIIGQK	0	3181.54	IPI00465028;IPI00797270;IPI00451401	IPI00465028	3	2.2988e-09	103.92	0.83759	0.49418	0.59289	0.99011	0.96013	0.99324
MREIVHIQAGQCGNQIGAK	0	2109.06	IPI00013475;IPI00031370;IPI00930715;IPI00974224;IPI00909140;IPI00953417;IPI00908770;IPI00007752;IPI00908605;IPI00013683;IPI00023598;IPI00926685;IPI00956241	IPI00007752	2,3	1.4416e-215	263.15	0.98041	1.0563	1.0574	1.0367	0.96013	0.985
ENIIDFIK	0	990.539	IPI00010796;IPI00878551;IPI00879437	IPI00010796	2	0.00032454	129.85	1.1146	0.9646	0.79806	0.8577	0.96023	1.1109
ETQRIIAEPVPGIK	0	1549.88	IPI00003949;IPI00874051;IPI00796342;IPI00376844	IPI00003949	2	2.0264e-06	131.66	0.99581	0.9418	0.92169	0.95025	0.96024	1.036
EFSIYMTK	0	1017.48	IPI00910267;IPI00018206	IPI00910267	2	0.017554	68.735	1.0099	0.89948	0.93989	0.97053	0.96026	1.0398
ITTPTYGDINHIVSATMSGVTTCIRFPGQINADIRK	0	3947	IPI00013475;IPI00031370;IPI00930715;IPI00974224;IPI00827736;IPI00909140;IPI00645452;IPI00647896;IPI00908770;IPI00007752;IPI00023598;IPI00926685	IPI00007752	3,4,5	1.5452e-13	113.13	1.061	1.3081	1.1767	0.77632	0.96027	1.0963
VGGIYTVIQTK	0	1177.67	IPI00303868;IPI00008867;IPI00157144	IPI00303868	2	0.0018502	88.596	1.3092	1.0696	0.80934	1.0453	0.9604	0.93656
AIQFIEEVK	0	1075.59	IPI00027626;IPI00552590	IPI00027626	2	0.0003948	116.77	0.93572	0.76287	0.85961	0.76409	0.96047	1.3092
AKPPPGGGEQEPPPPPAPQDVEMK	0	2449.19	IPI00011603	IPI00011603	3	1.9166e-08	106	0.9154	1.0414	1.1788	0.97946	0.96051	0.88644
VMPIIIQGFK	0	1144.67	IPI00029056;IPI00640051;IPI00640517;IPI00644973	IPI00029056	2	0.00063553	103.55	1.017	1.0305	1.0092	1.0828	0.96052	0.97911
GTDIMYTGTIDCWRK	0	1815.83	IPI00007188	IPI00007188	2	0	276.97	0.95331	0.91973	0.94014	0.98133	0.96059	0.96386
VVPIADIITPNQFEAEIISGRK	0	2409.33	IPI00013004;IPI00216320;IPI00418202;IPI00791490	IPI00013004	3	0.0041509	61.167	0.90817	1.2122	1.3646	1.3904	0.96059	0.89088
DRVRDVFEAK	0	1233.65	IPI00291510;IPI00925196;IPI00924999;IPI00795859	IPI00291510	2	0.12231	26.118	1.0375	0.90916	0.77681	0.88994	0.96065	1.1589
QIQDIATIADQRRAAHESK	0	2150.12	IPI00007402	IPI00007402	3	7.2924e-08	125.5	0.9429	0.86423	1.017	1.0088	0.96069	0.97428
NICQFIVEIGIAK	0	1503.81	IPI00015077	IPI00015077	2	7.2213e-22	196.84	1.0719	0.84139	0.90777	0.90884	0.96074	1.0535
KFMDQHPEMDFSK	1	1638.72	IPI00550746	IPI00550746	2	1.0187e-14	170.56	1.0069	1.1305	1.0309	0.96408	0.96081	1.0698
RGSNTTSHIHQAVAK	0	1605.83	IPI00305383	IPI00305383	2,3	0.00070223	96.489	1.117	1.0803	0.94305	1.1279	0.96087	1.0297
KIQFSIK	1	862.528	IPI00221035;IPI00419473;IPI00015946	IPI00221035	2	0.0059925	94.114	1.0863	0.95732	0.95619	0.9091	0.96088	1.1154
RQAEVEIASRVK	0	1384.78	IPI00014898;IPI00186711;IPI00398002;IPI00398778;IPI00398777;IPI00398779;IPI00398775;IPI00420096;IPI00398776	IPI00014898	2,3	1.2459e-05	134.49	0.9459	0.93298	0.96304	0.85694	0.9609	1.0312
ASGTIREYK	0	1023.53	IPI00026202;IPI00872093;IPI00847774;IPI00909746	IPI00026202	2	0.015982	63.076	0.86919	0.66095	0.77857	0.80427	0.961	0.97321
DIIINTMSQEEK	0	1419.69	IPI00296337	IPI00296337	2	0.00057991	97.463	1.0222	0.97597	0.97369	0.89598	0.9611	1.0674
RAFIIEEQK	0	1132.62	IPI00219160	IPI00219160	2	0.00059511	108.43	1.011	0.92995	0.92846	0.94097	0.96119	1.0229
IIDEVFFSEK	0	1225.62	IPI00299155;IPI00789638;IPI00790207;IPI00795606;IPI00791083	IPI00299155	2	0.00012261	137.17	0.97045	0.94039	0.98285	0.99892	0.96122	1.0135
MIWAVRTRCYVVK	0	1680.9	IPI00140138	IPI00140138	2	0.044634	68.515	0.99588	0.93681	0.9103	0.7867	0.96124	1.2115
GGEIQPVSVK	0	1012.56	IPI00220362;IPI00916763;IPI00916345	IPI00220362	2	0.00051936	107.06	1.0286	0.87522	0.84828	0.88693	0.96124	1.0838
RAVSREDSVKPGAHITVK	0	1949.08	IPI00419373;IPI00455134;IPI00939124;IPI00909208;IPI00927677;IPI00927407;IPI00470658	IPI00419373	3,4	0.00015071	101.42	1.0632	1.1337	0.96159	0.94918	0.96124	1.124
DRPFFAGIVK	0	1148.63	IPI00604590;IPI00795292;IPI00790982;IPI00375531;IPI00012048	IPI00604590	2	0.030249	52.725	1.0057	0.97774	0.94819	0.98257	0.96127	1.0094
AAVHYDRSGRSIGTADVHFERK	0	2471.24	IPI00328840	IPI00328840	3	8.4005e-07	110.37	0.92866	1.097	1.1408	1.1022	0.96139	0.88411
DFSESRNNRFSTPEQAAK	0	2082.97	IPI00848328;IPI00647473;IPI00940312;IPI00027834;IPI00465225	IPI00027834	3	0.020276	55.755	0.95895	0.98589	1.0033	0.98693	0.96157	1.0169
QIADETIIK	0	1029.57	IPI00217975;IPI00790831	IPI00217975	2	0.011565	71.614	1.072	0.8799	0.99873	1.0039	0.96157	0.99048
EIEEIVQPIISK	0	1396.78	IPI00003362	IPI00003362	2	1.0607e-27	208.82	0.93849	0.91894	1.0448	0.99405	0.96169	0.95601
IQTPNTFPK	0	1044.56	IPI00908873;IPI00216654;IPI00292387	IPI00908873	2	0.0024988	94.692	1.0479	0.96778	0.94843	1.0032	0.96179	0.99302
APEQEQAAPGPAAGGEAPK	0	1774.85	IPI00299024	IPI00299024	2,3	7.8181e-22	175.32	0.98567	0.99473	1.0189	0.97265	0.9618	0.90651
TAFQEAIDAAGDK	0	1335.63	IPI00216298;IPI00552768	IPI00216298	2	5.279e-15	173.71	1.1384	0.90305	0.82165	0.79356	0.9619	1.2377
ERYSYVCPDIVK	0	1527.74	IPI00028091	IPI00028091	2	1.0302e-05	137.84	1.0123	1.0158	1.0808	1.002	0.96196	1.0115
GVPIRIEVGPRDMK	0	1565.87	IPI00013452	IPI00013452	3	0.046675	49.423	0.88888	0.9268	1.039	0.99448	0.96202	0.98652
IHPTSVISGYRIACK	0	1700.9	IPI00290566	IPI00290566	2	1.4299e-06	134.04	0.92596	0.94953	1.0449	1.0415	0.96212	0.93089
QSIGEIIGTINAAK	0	1413.78	IPI00465028;IPI00797270;IPI00796633;IPI00451401	IPI00465028	2	1.2476e-42	240.46	0.9866	0.95431	0.98878	0.93766	0.96213	1.0238
ISAVQFPESADTTAK	0	1563.78	IPI00291205	IPI00291205	2	0.0016475	86.378	0.89791	0.84445	0.97237	0.94673	0.9622	1.0191
GEFVTTVQQRGAAVIK	0	1702.94	IPI00916111;IPI00915869;IPI00916861	IPI00916111	2	1.0098e-15	178.23	0.94582	0.93239	0.94529	1.0491	0.96225	0.92575
GSGIFDESTPVQTRQHINPPGGK	0	2421.2	IPI00909195;IPI00027397;IPI00607884;IPI00909743;IPI00607796	IPI00909195	3	8.2252e-10	126.07	0.98718	1.1264	1.0964	1.0339	0.96227	1.0611
ENIDAIEEIK	0	1172.59	IPI00218297;IPI00795913	IPI00218297	2	0.0037139	81.709	1.0666	0.90696	0.87029	0.90117	0.96228	1.0872
IAQQQAAAAAAAAAAASQQGSAK	0	2054.05	IPI00002922;IPI00922336;IPI00925198;IPI00927546;IPI00927137;IPI00973122	IPI00002922	3	2.4289e-05	90.718	1.2351	0.97941	0.78504	1.0396	0.96231	0.9441
VGGGEYIEIK	0	1063.56	IPI00940872;IPI00759542;IPI00759754;IPI00023283;IPI00179357;IPI00759637;IPI00759613;IPI00375499;IPI00375498;IPI00455173	IPI00940872	2	0.0036217	82.287	1.0253	0.96731	1.0445	0.9655	0.96265	1.0657
VEPHATIAEIK	0	1206.66	IPI00644037;IPI00100656	IPI00644037	2	0.00073935	97.813	1.0973	1.0195	0.84916	0.9275	0.96268	1.1014
AASAAQREIVAQGK	0	1398.76	IPI00298994	IPI00298994	2	6.4263e-55	255.85	0.9325	0.88568	1.0681	0.90452	0.96277	1.0088
INHEGEVNRARYMPQNPHIIATK	0	2687.37	IPI00646512;IPI00395865;IPI00879702;IPI00552530	IPI00646512	3	1.6186e-05	92.492	1.0183	0.83961	0.88074	1.0349	0.9628	0.86154
VIQCFAETGQVQK	0	1506.75	IPI00024067;IPI00455383	IPI00024067	2	9.898e-31	222.74	0.9506	0.97898	1.0207	1.1028	0.9629	0.88931
FQHIIRVINTNIDGRRK	0	2079.18	IPI00013296;IPI00894147	IPI00013296	3	0.052427	47.545	1.0534	0.71008	0.76271	0.66542	0.96301	1.2789
VHAYIISSIK	0	1129.65	IPI00017184;IPI00657915;IPI00853165;IPI00021458	IPI00017184	2	0.038837	49.35	0.9796	0.92219	0.97504	1.0098	0.9631	0.91262
KYDGRTKPIPK	1	1301.75	IPI00293434;IPI00790432	IPI00293434	3	0.082285	42.718	1.1524	1.0745	0.92545	0.70792	0.96313	1.1696
RYIEGTSCIAGVIVPAK	0	1832.98	IPI00010951	IPI00010951	2,3	5.7694e-13	154.82	0.96228	0.96035	0.93314	0.97337	0.96314	0.96671
ITISAIVDGK	0	1015.59	IPI00902560;IPI00216026;IPI00455531;IPI00024145;IPI00917420	IPI00902560	2	1.6961e-08	160.36	1.0083	1.0144	0.97347	1.0033	0.96318	1.0334
AEEQAVRQREIAEQEIEK	0	2155.09	IPI00014898;IPI00186711;IPI00398002;IPI00398778;IPI00398777;IPI00398779;IPI00398775;IPI00420096;IPI00398776	IPI00014898	3	0.0015264	76.85	1.0077	1.1146	1.0594	1.03	0.9632	0.96274
EIGIWEPIAVK	0	1253.7	IPI00553185;IPI00290770;IPI00552715	IPI00553185	1,2	8.3055e-05	131.83	0.96292	0.91995	0.92991	1.0887	0.96322	0.88221
IVIIGESAVGK	0	1084.65	IPI00016339;IPI00789439;IPI00017344;IPI00023510;IPI00927674;IPI00908835;IPI00924852;IPI00797838;IPI00927292;IPI00927919	IPI00016339	2	0.00045733	105.46	1.0075	0.95774	1.0721	1.0324	0.96328	1.0833
[truncated: 3,360 more rows]

## Sheet: proteome_1_1_1_1_1(proteins)
Protein IDs	Mol. weight [kDa]	Sequence length	Sequence lengths	PEP	Ratio #3/#1 normalized	Ratio #5/#1 normalized	Ratio #5/#3 normalized	Ratio #2/#1 normalized	Ratio #4/#1 normalized	Ratio #4/#2 normalized
IPI00973846;IPI00642206;IPI00418983;IPI00472654;IPI00414182	174.78	1508	1508;1454;1417;803;221	0.00026733	0.74008	0.64212	0.84968	0.75326	0.051289	0.068286
IPI00419901;IPI00878891;IPI00719141;IPI00896460;IPI00165990;IPI00910894	84.506	744	744;735;641;641;563;247	0.0033144	0.83582	0.64087	0.62594	1.1541	0.098932	0.086481
IPI00220373;IPI00514444	117.97	1019	1019;257	0.0005948	0.49567	0.3857	0.76066	0.24219	0.23292	0.9561
IPI00006052	16.648	154	154	1.6156e-81	0.94933	0.96652	1.0196	0.56246	0.38835	0.60238
IPI00329672	127.04	1109	1109	0.00042215	0.65439	0.52876	0.93167	0.53372	0.54105	0.93324
IPI00455473;IPI00739902;IPI00655578	213.7	1907	1907;1848;785	0.00015247	0.92989	0.83606	0.96778	1.0648	0.58572	0.53331
IPI00030131;IPI00791301;IPI00873716;IPI00181409;IPI00795693;IPI00795286	50.67	454	454;414;378;345;169;107	1.7614e-43	0.72295	0.75776	0.90385	0.84028	0.60433	0.76398
IPI00873506;IPI00942902;IPI00644409	52.836	471	471;454;410	3.1072e-36	1	0.92052	0.94262	1.0412	0.61481	0.62035
IPI00646917	26.227	227	227	1.344e-12	0.97091	0.8678	0.90323	0.75851	0.61892	0.82659
IPI00185919;IPI00643027;IPI00411690	123.51	1096	1096;1096;1019	4.9646e-05	0.73131	0.67039	0.82862	0.70148	0.62555	0.96298
IPI00329596;IPI00873607;IPI00556619	42.471	371	371;296;258	0.0022882	0.65867	0.66064	1.0257	0.64926	0.6271	1.2351
IPI00291928;IPI00646415	23.897	215	215;181	0.0015411	0.92918	0.65419	0.68185	0.56049	0.62807	1.1196
IPI00170786;IPI00910819;IPI00739738	69.997	641	641;607;202	0.00020882	1.0572	0.59146	0.5418	0.59971	0.63398	1.1019
IPI00013174;IPI00556514;IPI00719549;IPI00917085;IPI00644837;IPI00916274;IPI00916896;IPI00969146	69.491	669	669;552;339;159;156;147;129;119	5.0147e-07	0.81706	0.82237	0.97332	0.84668	0.64186	0.82316
IPI00329345;IPI00872549;IPI00794411	59.544	545	545;545;295	1.0881e-08	1.0227	0.85973	0.73377	0.61371	0.65427	1.3586
IPI00102661;IPI00008477	89.392	783	783;747	0.00054849	0.82301	0.67988	0.98232	1.004	0.65746	0.66102
IPI00420108;IPI00384122;IPI00033034;IPI00384016	48.755	453	453;367;451;279	1.251e-69	0.90143	0.8948	0.95105	0.86427	0.66471	0.88375
IPI00880028;IPI00792395;IPI00927647;IPI00470467;IPI00903331;IPI00910178;IPI00908675;IPI00973067;IPI00924702	84.603	749	749;680;680;677;633;573;452;418;211	2.2776e-13	0.93953	0.86557	0.94246	0.81287	0.66774	0.81798
IPI00029795;IPI00218035;IPI00941207;IPI00218037;IPI00218041;IPI00218039	55.674	508	508;508;499;430;428;406	0.0039465	0.70015	0.73224	1.0291	1.0971	0.67385	0.5811
IPI00409717;IPI00328328;IPI00924536;IPI00030296;IPI00793328;IPI00790077;IPI00792676	46.489	408	408;407;362;312;229;218;131	2.3483e-173	0.7143	0.89456	0.9937	0.72397	0.68704	0.95627
IPI00551024	58.946	575	575	0.00057213	0.98471	0.59212	0.54073	0.58459	0.70445	0.99129
IPI00009466;IPI00007673	17.66	170	170;151	0.0025153	0.95779	0.72626	0.83994	0.88187	0.70704	0.8562
IPI00477971;IPI00643087;IPI00549223	89.034	808	808;756;694	0.0044461	0.63537	0.70107	1.3296	0.76802	0.71069	1.0843
IPI00018260;IPI00909723	31.28	282	282;180	2.3234e-06	1.1042	0.92791	0.85912	0.97543	0.71654	0.85511
IPI00550308	97.394	932	932	0.0024413	1.1038	0.84693	0.79261	1.0068	0.7178	0.73761
IPI00553153	12.405	107	107	2.0475e-05	0.86987	0.558	0.67316	0.80334	0.72389	0.89621
IPI00550069	49.973	461	461	1.01e-63	0.92478	1.1574	1.1893	0.88551	0.72663	0.85492
IPI00744319;IPI00965550;IPI00217053;IPI00868973;IPI00868764;IPI00868717;IPI00942375	48.525	464	464;464;462;445;418;311;311	0.0030795	0.86851	0.67645	0.82801	0.85444	0.72782	0.88892
IPI00017763;IPI00941463;IPI00798071;IPI00788840;IPI00789437	44.078	386	386;375;196;178;278	9.6606e-31	0.97747	0.87094	0.99655	0.87289	0.73492	0.87428
IPI00965105;IPI00852741;IPI00746182;IPI00795507;IPI00966405;IPI00515103;IPI00965360;IPI00305152;IPI00853220;IPI00445429;IPI00953506;IPI00853290;IPI00966669;IPI00965367;IPI00964020;IPI00966648	136.22	1251	1251;1233;1220;1205;1200;1181;1166;1106;1067;969;969;877;383;286;237;181	2.6996e-25	0.95981	0.7541	0.83346	0.91266	0.73601	0.8312
IPI00940340;IPI00001636;IPI00385153;IPI00940152	53.914	478	478;475;453;411	0.00057905	0.97144	0.81081	0.69364	0.80877	0.7409	0.94162
IPI00022145;IPI00844197	27.296	243	243;203	1.0307e-13	0.90403	0.80606	0.80475	0.81462	0.74149	0.88137
IPI00940084;IPI00216135;IPI00296039;IPI00970818;IPI00940343;IPI00000230;IPI00014581;IPI00604537;IPI00915324;IPI00941861;IPI00216134;IPI00384369;IPI00018853;IPI00921977;IPI00745267;IPI00844078;IPI00900375	36.517	317	317;284;284;284;326;284;284;284;284;284;248;248;243;248;228;223;210	1.9176e-17	0.89513	0.75881	0.85508	0.94056	0.74506	0.88859
IPI00171611;IPI00465070;IPI00219038;IPI00909530;IPI00455457;IPI00974438;IPI00216402;IPI00974574;IPI00419884;IPI00477080;IPI00784001;IPI00793280;IPI00942498	15.388	136	136;136;136;113;136;136;136;136;135;123;68;113;107	5.1442e-53	0.98495	0.80913	0.9709	0.91729	0.74762	0.96402
IPI00028481	23.668	207	207	2.6851e-13	0.80649	0.74692	0.99853	0.89883	0.74873	0.9192
IPI00218624;IPI00218620;IPI00000192;IPI00218622;IPI00748258;IPI00218619;IPI00218618;IPI00217930;IPI00218621;IPI00903283;IPI00444149	268.09	2466	2466;2459;2426;2386;2140;2325;2303;2282;2108;579;454	4.5954e-06	0.96247	1.0541	1.0075	0.87403	0.75416	0.9035
IPI00218019;IPI00019906;IPI00394877	42.2	385	385;269;205	6.806e-102	1.0963	0.74096	0.67197	0.6474	0.75767	1.1525
IPI00908725;IPI00328929;IPI00293312;IPI00952968	108.98	977	977;953;757;757	0.0016746	0.85859	0.83669	0.97328	0.89456	0.75807	0.92304
IPI00411706;IPI00641040;IPI00645836	31.462	282	282;253;230	1.5278e-157	0.92763	0.7767	0.85545	0.61029	0.75891	1.1335
IPI00550020;IPI00830138;IPI00815656	11.53	102	102;101;63	3.6166e-05	0.95474	0.77076	0.77258	0.76377	0.76107	0.97193
IPI00470573;IPI00005159;IPI00909247	45.376	399	399;394;305	3.6896e-05	0.88593	0.75694	0.89793	0.84995	0.76567	0.91914
IPI00410162;IPI00026670;IPI00917694	17.911	161	161;118;113	3.0761e-06	1.0066	0.7882	0.80676	0.90515	0.76572	0.89904
IPI00031554	82.564	737	737	6.8406e-56	0.94572	1.0606	1.181	1.1067	0.76629	0.91144
IPI00878557;IPI00014513	62.157	574	574;414	1.3777e-15	1.0961	0.63215	0.62658	0.65765	0.77126	1.1428
IPI00847168;IPI00017256;IPI00377066;IPI00478433	31.359	280	280;277;224;229	0.00065811	1.2887	1.2288	0.82552	0.99335	0.7721	0.75865
IPI00183002;IPI00397728;IPI00413191;IPI00397730;IPI00939648;IPI00789895	115.28	1030	1030;995;974;971;943;195	8.7503e-06	1.1268	0.6403	0.57587	0.54963	0.77233	1.3604
IPI00465294;IPI00909093	92.25	802	802;775	1.8254e-21	0.94228	0.9381	1.0512	0.52884	0.77253	1.205
IPI00218474;IPI00909949;IPI00942494;IPI00909595;IPI00973764;IPI00973962	46.931	434	434;406;391;273;58;38	2.9578e-193	0.98524	0.83856	0.97535	0.80917	0.77532	0.93663
IPI00910513;IPI00909083;IPI00218829;IPI00642097	68.699	637	637;636;499;628	1.2554e-23	1.1844	0.77409	0.98396	0.6995	0.77579	1.0765
IPI00017526	10.4	95	95	0.00033649	0.88574	0.74964	0.85428	0.96421	0.7758	0.79604
IPI00220687;IPI00152441;IPI00552772;IPI00329296	46.825	426	426;377;335;394	1.4094e-07	0.91811	0.81135	0.86385	0.70599	0.77588	0.97886
IPI00328753;IPI00909030;IPI00783726;IPI00337736	156.27	1357	1357;1329;1306;1300	2.9745e-09	1.0204	1.1601	0.84372	0.83794	0.77651	1.0681
IPI00009901;IPI00943759;IPI00943707;IPI00943826	14.478	127	127;340;126;126	2.6986e-06	0.90518	0.72801	0.82569	0.89647	0.77708	0.90825
IPI00013933;IPI00969616;IPI00217182	331.77	2871	2871;2428;2272	8.9394e-29	0.90975	0.84211	0.9245	0.65676	0.7803	1.1458
IPI00005737;IPI00399142;IPI00641719;IPI00922295;IPI00922900	30.394	269	269;188;186;214;128	4.3897e-36	1.018	0.73934	0.72948	0.71413	0.78209	1.161
IPI00867509;IPI00943173;IPI00798401;IPI00797709	58.947	527	527;474;437;158	4.8291e-40	1.0331	0.78021	0.72592	0.7236	0.78282	1.1565
IPI00815713;IPI00815944;IPI00815731;IPI00965339;IPI00914061;IPI00165041;IPI00941770;IPI00969501;IPI00298696;IPI00555853;IPI00909120;IPI00966633;IPI00965844;IPI00965583	156.06	1525	1525;1489;1488;1488;1451;1450;1414;1412;1411;958;542;365;188;148	4.4253e-157	0.92161	0.82287	0.86639	0.85459	0.78489	0.94076
IPI00013871;IPI00943207	90.069	792	792;711	4.6001e-12	1.0056	0.69862	0.69604	0.68511	0.78584	1.024
IPI00871742;IPI00235412;IPI00146935;IPI00555883;IPI00037283;IPI00942042;IPI00473085;IPI00910662	87.811	789	789;763;736;725;710;710;699;533	3.2941e-05	1.0373	0.70597	0.68517	0.61082	0.78627	1.2877
IPI00006038;IPI00337397;IPI00216688;IPI00953181;IPI00337395;IPI00936708;IPI00337396	197.58	1817	1817;1800;1726;1714;937;920;666	0.00024291	0.96375	0.83487	0.86263	0.83391	0.78634	1.0017
IPI00008728	69.223	633	633	0.0031524	0.83745	0.81323	1.078	1.1017	0.7891	0.65517
IPI00913873;IPI00027034;IPI00913859	76.507	677	677;644;601	5.1821e-06	1.0771	0.80268	0.74977	0.76906	0.7895	0.98604
IPI00030767;IPI00337392	10.897	106	106;85	9.1929e-10	0.8974	0.7686	0.85292	0.90881	0.79271	0.96166
IPI00216008;IPI00853547;IPI00289800;IPI00884082	63.826	561	561;545;515;509	1.0941e-08	0.93345	0.75852	0.89559	1.019	0.7938	0.83175
IPI00018855	15.736	155	155	6.6414e-15	1.1441	1.0171	0.77973	0.63206	0.79442	1.2573
IPI00387130;IPI00025333;IPI00908414;IPI00878389	33.582	312	312;299;203;72	1.1648e-07	1.0686	0.7464	0.80931	0.95781	0.796	0.86405
IPI00221325;IPI00915960;IPI00375793;IPI00921207;IPI00293568;IPI00956184;IPI00935150;IPI00938417;IPI00787969;IPI00916646;IPI00916867;IPI00100787;IPI00926222;IPI00917371;IPI00879540;IPI00943097;IPI00917621;IPI00916003;IPI00888992;IPI00917503;IPI00917309	358.2	3224	3224;2248;1766;1766;1765;1765;1758;1758;1625;1503;1159;904;291;173;156;156;152;135;134;134;98	3.9163e-06	0.9921	0.82781	0.83743	0.80551	0.7995	0.97004
IPI00306708	37.211	333	333	2.2268e-07	0.97964	1.0983	1.0777	0.88434	0.8013	0.81544
IPI00479306;IPI00383971;IPI00910237	28.48	263	263;203;160	2.0923e-11	0.97951	0.86423	0.90134	0.88005	0.80167	0.94857
IPI00641384;IPI00031242;IPI00166487;IPI00896436;IPI00219314;IPI00872611;IPI00167711	251.89	2357	2357;2201;2159;2154;2134;734;385	0.0020149	0.93945	0.6811	0.79454	0.87172	0.80214	0.98455
IPI00784044;IPI00789428;IPI00967193;IPI00968098	61.332	563	563;525;286;90	5.4415e-20	0.92232	0.6652	0.72182	0.78304	0.80313	1.0204
IPI00441867;IPI00642757;IPI00922422	32.806	299	299;279;186	9.5405e-13	0.97887	0.91355	0.8531	1.077	0.80349	0.73461
IPI00001757;IPI00216659	19.889	174	174;173	0.0058555	0.99325	0.87112	0.88674	0.8862	0.80457	1.0011
IPI00940872;IPI00759542;IPI00759754;IPI00023283;IPI00179357;IPI00759637;IPI00759613;IPI00375499;IPI00375498;IPI00455173	3881.2	34942	34942;34474;34350;34258;33615;33445;33423;27118;27051;26926	0.0002214	1.0038	0.7934	0.86812	0.76535	0.80504	1.1771
IPI00477313;IPI00216592;IPI00909232;IPI00759822;IPI00911096;IPI00759596;IPI00027569;IPI00735540;IPI00887991;IPI00868835;IPI00910718;IPI00910666;IPI00790685;IPI00166137;IPI00877664	33.67	306	306;293;288;226;196;250;293;293;293;226;147;135;304;291;102	2.1842e-40	0.9649	0.80379	0.88018	0.84427	0.80959	1.0643
IPI00916600;IPI00916768;IPI00794543;IPI00075248;IPI00386621;IPI00915959;IPI00216984;IPI00945782	21.689	196	196;187;152;149;148;65;149;113	3.7035e-22	0.95239	0.83037	0.85849	0.89074	0.81012	1.0406
IPI00145593;IPI00917856	96.256	860	860;414	0.00030507	0.93894	0.85451	0.86357	0.89138	0.81015	0.8882
IPI00290410;IPI00921860	90.669	810	810;601	5.8004e-05	0.8327	0.76385	0.92951	0.91925	0.81024	0.90188
IPI00015148;IPI00019345;IPI00877120;IPI00796349;IPI00816182;IPI00942831;IPI00908754	20.825	184	184;184;184;157;153;142;137	0.0021784	0.9171	0.83535	0.91585	1.053	0.81093	0.83729
IPI00005490	33.81	298	298	2.435e-15	1.0007	0.80625	0.91381	0.88585	0.81103	0.9532
IPI00642984;IPI00218200;IPI00641554;IPI00639976;IPI00646739	34.752	313	313;246;187;182;178	1.4242e-11	0.98422	0.80973	0.77109	0.85587	0.8123	0.99663
IPI00010740;IPI00216613	76.149	707	707;669	7.7667e-23	0.9802	0.85866	0.88195	0.84678	0.81494	0.98454
IPI00412499;IPI00412500;IPI00479273	63.542	569	569;533;369	1.9756e-05	0.80286	0.73011	0.89235	0.82219	0.81514	0.88766
IPI00017341	51.475	481	481	9.7956e-07	1.0024	0.75331	0.80853	0.91776	0.81544	0.8694
IPI00018031;IPI00555728;IPI00166751;IPI00306044	51.839	468	468;447;431;230	0.00559	0.94998	0.88383	0.99046	0.92352	0.81632	0.8655
IPI00029731;IPI00793102;IPI00879894;IPI00926288;IPI00926495	12.538	110	110;94;70;57;55	1.2346e-33	1.0717	0.86227	0.84368	0.84693	0.81659	1.0333
IPI00456887;IPI00929107	85.104	747	747;746	2.3143e-05	0.94926	0.88462	0.99464	0.88317	0.81666	1.0126
IPI00384497	28.368	254	254	5.5549e-30	0.93924	0.89483	0.90432	0.88589	0.81691	0.93858
IPI00216682;IPI00909623;IPI00642542	36.413	329	329;283;185	2.1732e-05	0.90738	0.85719	0.97469	0.89661	0.81962	0.96025
IPI00658097;IPI00554761;IPI00894043;IPI00893375;IPI00893633;IPI00749279;IPI00788131;IPI00974418;IPI00935551	12.435	116	116;100;48;45;44;100;100;100;90	4.2502e-05	0.9421	0.7989	0.86221	0.81273	0.82221	1.0241
IPI00021466;IPI00337775;IPI00386299;IPI00455339;IPI00967955	53.524	479	479;400;367;367;351	0.0018886	1.0012	0.886	0.88044	0.92524	0.82477	0.96568
IPI00290461;IPI00910728	29.062	258	258;204	5.4758e-14	0.95196	0.89259	0.93277	0.95752	0.82617	0.76245
IPI00908873;IPI00216654;IPI00292387	73.744	700	700;709;699	1.742e-52	0.95413	0.87541	0.93354	0.89431	0.82756	0.99302
IPI00742743;IPI00657704;IPI00029778;IPI00657708	214.11	1977	1977;1975;1972;1927	0.0010333	0.95261	0.88821	0.86064	0.87575	0.8302	0.92812
IPI00013468;IPI00514701;IPI00644108;IPI00644568	37.154	328	328;326;278;145	5.9595e-37	1.018	0.82633	0.82753	0.85127	0.83181	0.95903
IPI00644037;IPI00100656	37.467	323	323;308	2.6905e-05	1.0808	0.76727	0.7042	0.77931	0.83297	1.0644
IPI00441473;IPI00064328;IPI00794580	72.683	637	637;620;593	2.9856e-05	0.90886	0.96449	1.0024	0.92723	0.83608	0.89327
IPI00027341;IPI00916783;IPI00908511;IPI00972980;IPI00917562	38.498	348	348;333;327;253;218	2.7109e-15	1.0804	0.82943	0.90013	0.86458	0.83699	1.12
IPI00031556;IPI00830039	53.5	475	475;471	8.0942e-207	0.9881	0.79982	0.97564	0.76961	0.83702	0.99258
IPI00027270;IPI00433834;IPI00007144;IPI00789514;IPI00792420;IPI00790553;IPI00552470;IPI00455174;IPI00872953	17.258	145	145;153;145;110;63;1873;1839;1835;1761	9.2435e-39	0.99053	0.95002	0.90136	0.8969	0.83753	1.0268
IPI00929418	11.119	101	101	0.034403	0.98807	0.77008	0.76136	0.69331	0.83786	1.2296
IPI00019329	10.366	89	89	2.4522e-21	1.0549	1.0329	0.88703	0.8085	0.838	0.95648
IPI00219219	14.716	135	135	0.00014411	1.2196	0.78349	0.84729	0.91837	0.83929	0.89898
IPI00872359;IPI00029485;IPI00873712;IPI00917681;IPI00935906;IPI00916757;IPI00219114;IPI00914026;IPI00917166;IPI00555695	142.08	1283	1283;1278;1278;1253;1253;1236;1144;1139;890;459	5.8439e-07	1.0565	1.0647	1.109	1.0427	0.83935	0.95902
IPI00297579;IPI00917509;IPI00917646	20.811	183	183;101;62	2.9681e-59	0.88777	0.89127	1.0785	1.0495	0.83973	0.92844
IPI00031169;IPI00102896;IPI00798089;IPI00790570;IPI00794561;IPI00879279	23.545	212	212;216;181;104;94;62	0.00041193	1.011	0.94497	0.93113	0.97377	0.83975	0.91927
IPI00640703;IPI00747670;IPI00549861;IPI00872800	136.31	1204	1204;1204;645;630	1.5748e-15	1.0291	0.79786	0.80583	0.94277	0.84027	0.83916
IPI00216260;IPI00021016;IPI00910455;IPI00916152;IPI00916739;IPI00956590	37.656	346	346;325;285;215;169;167	0.00041048	0.97652	1.1923	1.2	0.86745	0.8445	0.94318
IPI00011698;IPI00927280;IPI00940972	19.526	172	172;160;153	5.6528e-28	0.96588	0.9136	0.86284	0.95906	0.84624	1.0365
IPI00025974;IPI00060414	24.95	224	224;233	6.1054e-09	0.86989	0.87061	1.0446	0.9339	0.84925	0.90835
IPI00470520;IPI00744785;IPI00973728;IPI00424530;IPI00424529	31.392	281	281;247;235;202;152	0.0025528	0.94023	0.89256	0.93425	0.95126	0.84932	0.94685
IPI00305064;IPI00956122;IPI00827658;IPI00827650;IPI00418465;IPI00828064;IPI00828192;IPI00827795;IPI00828056;IPI00419219;IPI00827893;IPI00827982;IPI00827937;IPI00854669;IPI00297160;IPI00922478;IPI00918020;IPI00974500	81.537	742	742;734;713;711;699;699;691;674;668;493;429;425;396;395;361;340;329;287	1.2013e-29	1.0164	0.76717	0.80631	0.79749	0.84979	1.1091
IPI00030116;IPI00968239;IPI00941001;IPI00643166;IPI00966941	62.941	570	570;566;542;504;461	0.0038649	0.92625	0.94831	0.99631	1.0738	0.85035	0.89496
IPI00008708;IPI00642046	54.972	490	490;489	7.5282e-58	0.94971	0.84525	0.91348	0.81384	0.8522	0.97501
IPI00013290;IPI00939776;IPI00885081	74.815	676	676;671;670	3.1589e-10	0.79059	0.81143	1.0227	0.88321	0.85312	0.92804
IPI00301058	39.829	380	380	1.1371e-36	0.93169	0.91953	1.0087	0.82109	0.85337	1.0026
IPI00003927	40.763	370	370	3.0468e-11	1.0039	0.80124	0.80008	0.82026	0.85364	1.0267
IPI00306043;IPI00397024	62.333	579	579;529	6.2765e-06	0.92194	0.82563	0.94316	0.86218	0.85376	1.0167
IPI00024670;IPI00922887;IPI00922290	21.493	189	189;162;156	0.0015299	0.93663	0.71991	0.78577	0.81154	0.85537	0.96243
IPI00657706;IPI00885058;IPI00019068	52.764	472	472;399;340	2.1604e-09	0.9286	0.80448	0.84745	0.90074	0.85557	0.94034
IPI00015897;IPI00885057;IPI00869333	37.489	332	332;313;146	3.7445e-18	0.96592	0.92777	0.9503	0.89124	0.856	0.93712
IPI00005719;IPI00937805;IPI00922662;IPI00917079;IPI00334174;IPI00185217;IPI00024282;IPI00909683;IPI00022134;IPI00556414;IPI00790414;IPI00903040	22.677	205	205;205;173;173;141;129;207;207;163;152;92;81	1.1942e-146	0.92916	0.73905	0.76002	0.95306	0.85704	0.99188
IPI00646086;IPI00037619;IPI00219162	11.502	99	99;51;51	3.0101e-28	1.0535	0.86989	0.80298	0.69754	0.85908	1.2938
IPI00295098;IPI00797747	29.702	271	271;105	9.3831e-56	1.0823	1.0668	0.94125	1.3332	0.86232	0.96501
IPI00218568	11.999	104	104	0.00074482	1.0812	0.81982	0.80181	0.8847	0.86319	1.0609
IPI00955848;IPI00010402;IPI00746352;IPI00514669	26.819	257	257;226;93;88	1.6081e-16	0.9644	1.1371	1.152	0.84485	0.86356	1.0212
IPI00419979;IPI00553222;IPI00896377;IPI00410084;IPI00027382;IPI00930214;IPI00941059	58.075	525	525;580;565;559;544;540;460	3.98e-276	0.97593	1.0461	1.0351	1.0248	0.86418	1.0192
IPI00470498;IPI00412714;IPI00410693;IPI00470497	43.135	393	393;387;465;402	4.5807e-191	1.0136	0.83818	0.86698	0.9269	0.86703	1.0402
IPI00413451;IPI00749398;IPI00513699	46.402	409	409;376;192	1.8852e-07	1.1798	0.89248	0.66362	0.81219	0.86717	1.0809
IPI00006378;IPI00745538;IPI00791902	7.0662	64	64;64;43	0.00141	1.048	0.86283	0.79794	0.85104	0.86868	1.0828
IPI00083708;IPI00739117;IPI00902898;IPI00852708;IPI00902809;IPI00941219;IPI00148247;IPI00946618;IPI00941970;IPI00902970;IPI00910607	317.17	2899	2899;2898;2897;2896;2850;2850;2753;2752;2702;2654;860	2.242e-08	1.1839	0.88966	0.77098	0.6617	0.86921	1.2823
IPI00449049;IPI00973237	113.08	1014	1014;250	5.0968e-61	1.0282	0.91108	0.86858	0.9003	0.86989	0.93045
IPI00221394;IPI00873935;IPI00874145;IPI00915274;IPI00852712;IPI00852780;IPI00893630	57.673	514	514;514;512;509;259;229;169	1.1788e-07	0.89097	1.0164	1.1892	1.0903	0.86991	0.82112
IPI00009328	46.871	411	411	0	0.9862	0.97183	0.97546	0.89226	0.86994	0.98258
IPI00552671;IPI00871326	211.06	1896	1896;1873	0.0027799	1.0009	0.96009	1.0467	0.89917	0.87035	1.0125
IPI00029266;IPI00068430;IPI00071399;IPI00647942	10.803	92	92;92;79;52	1.1339e-12	0.96196	0.84353	0.88724	0.82695	0.87065	1.076
IPI00555744;IPI00925323;IPI00815843	23.787	220	220;213;124	2.8569e-05	1.0443	0.86599	0.83674	0.94134	0.87066	0.94041
IPI00215918;IPI00909515;IPI00215919;IPI00853337;IPI00792330;IPI00946929;IPI00947463;IPI00944969	20.511	180	180;229;180;150;127;153;59;56	6.302e-41	0.8199	0.83298	0.93179	0.84098	0.87135	1.0477
IPI00301579;IPI00940960	22.409	201	201;151	0.00017477	0.94773	0.95383	1.0044	1.0115	0.87148	0.85535
IPI00472442;IPI00016832;IPI00910408;IPI00910833	30.239	269	269;263;164;130	1.1336e-34	0.99816	0.84842	0.81731	0.88263	0.87189	1.0343
IPI00945633;IPI00946839;IPI00301021;IPI00945795;IPI00946676;IPI00449669	33.887	298	298;291;286;266;265;259	7.7132e-08	0.95352	0.89544	0.96169	0.94743	0.87205	1.013
IPI00033130;IPI00640965;IPI00647006	38.449	346	346;299;299	6.0025e-05	0.94846	0.78795	0.79109	0.87027	0.87304	0.97337
IPI00642374;IPI00549849;IPI00299313;IPI00219513;IPI00549820;IPI00641843;IPI00219512;IPI00549253	41.694	368	368;355;329;328;326;317;316;258	0.0015245	0.91539	0.85154	0.83611	1.0341	0.87338	0.7887
IPI00007346;IPI00643915;IPI00645020	19.208	177	177;144;134	5.8873e-10	0.92294	0.82833	0.98887	1.0949	0.87365	0.90953
IPI00020042;IPI00738042;IPI00216770	47.366	418	418;414;387	1.6888e-76	1.0522	0.98495	0.96531	0.92163	0.87372	0.98805
IPI00011302	14.177	128	128	8.3196e-08	0.99582	1.2093	1.2043	0.97036	0.87377	0.96394
IPI00783902;IPI00939856;IPI00876909	222	2040	2040;2039;1965	0.049218	0.91775	1.1185	1.2047	0.93548	0.87384	0.89859
IPI00102864;IPI00917193	102.38	917	917;889	2.4498e-10	0.88505	0.81623	0.89762	0.73801	0.87386	1.1597
IPI00646304;IPI00791367	23.742	216	216;178	1.0476e-127	1.0624	0.92966	0.94731	0.94123	0.87443	1.0748
IPI00030098;IPI00015912	40.241	339	339;325	3.1688e-44	1.0898	0.89454	0.92584	0.91435	0.87539	0.93363
IPI00219953;IPI00908752;IPI00514929;IPI00514049;IPI00909419	25.855	228	228;181;169;168;179	1.604e-71	0.99643	0.83101	0.88085	0.88353	0.87571	1.0024
IPI00017963;IPI00930678	13.527	118	118;108	3.561e-50	1.0454	0.932	0.85605	0.97295	0.87594	0.92811
IPI00008986	55.01	507	507	3.4564e-06	0.91964	0.83575	0.87367	0.94125	0.87668	0.88312
IPI00220487;IPI00456049;IPI00792135;IPI00879809	18.491	161	161;137;102;102	9.469e-25	0.9277	0.87759	0.87438	0.89664	0.87751	1.036
IPI00917228;IPI00385149;IPI00917401;IPI00973572;IPI00916962;IPI00827535;IPI00455510;IPI00479214;IPI00940842;IPI00916480;IPI00916955	15.747	148	148;136;136;134;131;111;110;110;109;107;62	1.2987e-79	0.89755	0.82115	0.92806	0.90413	0.87779	0.93458
IPI00216587;IPI00645201	24.205	208	208;188	2.5242e-112	0.96993	0.94776	1.0208	0.94125	0.87822	0.99961
IPI00291419	44.642	426	426	6.5762e-76	0.91777	0.9067	0.98019	0.99772	0.87855	0.91911
IPI00220402;IPI00927947;IPI00410126;IPI00044607;IPI00789386;IPI00789065;IPI00418999;IPI00924602;IPI00794579	23.015	205	205;170;205;205;125;64;161;80;77	1.1586e-25	0.97849	0.84183	0.87932	0.94551	0.87902	0.9983
IPI00337541;IPI00964130;IPI00963871;IPI00967459;IPI00964391;IPI00965349	113.89	1086	1086;955;217;199;58;57	9.0347e-17	1.0064	0.8824	0.96423	0.88138	0.87934	1.0581
IPI00015361;IPI00030303;IPI00792988;IPI00791925;IPI00028183;IPI00793611	17.328	154	154;109;99;85;66;61	1.4487e-30	0.98757	1.0066	1.0314	0.91051	0.87941	1.016
IPI00171798	75.022	668	668	2.1605e-05	0.84893	1.1232	1.1112	0.8929	0.88061	1.0988
IPI00304911;IPI00007812;IPI00926751;IPI00848320;IPI00925534;IPI00925827;IPI00924887	56.832	513	513;511;496;406;249;248;118	4.2758e-07	0.93031	1.0402	1.116	0.98909	0.88091	0.90259
IPI00332428	35.368	300	300	3.3116e-15	0.90207	0.8548	0.90466	0.86675	0.88179	0.94439
IPI00790342;IPI00329389;IPI00867533;IPI00797034;IPI00789282;IPI00880154	32.872	289	289;288;288;105;70;68	4.0402e-47	0.94917	0.84022	0.92042	0.93641	0.88212	1.0272
IPI00004534	144.73	1338	1338	0.0020869	1.0603	0.98902	0.93894	0.92167	0.88221	0.91674
IPI00023529;IPI00878174	36.938	326	326;120	5.4864e-07	0.95228	1.0323	1.1419	0.90444	0.88262	1.0021
IPI00414860;IPI00926175;IPI00926815;IPI00924813;IPI00477215	10.275	92	92;75;68;58;93	1.3127e-108	1.0025	0.90464	0.87742	0.78194	0.883	1.0747
IPI00789155;IPI00941900	38.05	323	323;315	2.8167e-89	0.99293	0.95112	1.0519	0.95738	0.88321	1.0754
IPI00915993;IPI00216348;IPI00827813;IPI00917978;IPI00744015;IPI00827859;IPI00302712;IPI00412601;IPI00917325;IPI00915884;IPI00917785;IPI00917075;IPI00917180;IPI00917685;IPI00916160;IPI00917564;IPI00916306;IPI00916278	70.484	630	630;612;611;305;638;637;632;251;187;185;173;137;214;184;151;139;121;110	9.548e-210	0.94692	0.86732	0.83357	0.89947	0.88329	0.98176
IPI00003783;IPI00795187;IPI00419792	44.424	400	400;303;380	1.225e-07	0.94543	0.86795	0.94375	0.88481	0.88334	0.98014
IPI00025815;IPI00971018;IPI00639819;IPI00910355	44.991	416	416;414;295;298	3.6913e-73	1.0147	0.9432	0.89592	0.96157	0.88419	1.0159
IPI00470502;IPI00301109;IPI00654717;IPI00470503;IPI00964988;IPI00910509;IPI00413014;IPI00749469;IPI00968235	39.638	349	349;334;316;305;226;202;232;221;191	7.9108e-12	0.93971	0.9461	0.99682	1.0033	0.88482	0.87333
IPI00914529;IPI00910727;IPI00182533;IPI00816097;IPI00914543	19.148	169	169;163;137;87;69	5.4379e-17	0.9937	0.79818	0.79606	0.8263	0.88485	1.3643
IPI00298851	28.295	253	253	0.00040488	0.99903	0.79957	0.95297	0.70257	0.88497	1.3001
IPI00748256;IPI00479722	28.601	250	250;249	1.1819e-32	0.99769	0.91014	0.93743	0.88712	0.8855	0.99364
IPI00017617;IPI00798375	69.147	614	614;544	0	0.99917	1.0363	0.99125	0.94151	0.88555	0.9344
IPI00007163	11.602	103	103	1.0524e-08	1.0199	0.83421	0.83051	0.77902	0.88561	1.1547
IPI00785113;IPI00006207;IPI00382733	89.252	808	808;784;752	6.2841e-69	1.0531	0.90301	0.83245	0.84424	0.88629	1.0358
IPI00032826;IPI00793211;IPI00892521;IPI00168839	41.331	369	369;369;146;369	3.3112e-77	0.98301	0.89716	0.91913	0.94921	0.88701	0.96191
IPI00002214;IPI00789457	57.861	529	529;529	9.3666e-14	0.98903	0.87239	0.96879	0.84008	0.88786	0.96641
IPI00000874;IPI00640741;IPI00641244	22.11	199	199;171;97	6.5745e-295	0.97463	0.94823	0.98433	0.9462	0.88859	0.97945
IPI00021048;IPI00216269;IPI00645867;IPI00385318;IPI00830037;IPI00216268;IPI00829909;IPI00479416	234.71	2061	2061;2051;2048;1577;1577;2019;419;160	2.4817e-36	1.0137	1.0995	0.93543	0.9541	0.8887	1.0001
IPI00790491;IPI00792465;IPI00014147;IPI00793987	12.664	116	116;115;111;84	4.626e-05	1.1662	0.9573	0.88915	0.90352	0.88876	1.0471
IPI00412607;IPI00550247;IPI00455757	14.551	123	123;96;99	7.4629e-74	0.98122	0.8753	0.8965	0.88477	0.88974	1.0198
IPI00761160;IPI00761140;IPI00760715;IPI00968085;IPI00305750;IPI00220857;IPI00964032;IPI00413492;IPI00921920;IPI00761035;IPI00761069;IPI00964761;IPI00966074;IPI00967304;IPI00970915;IPI00965413;IPI00973916;IPI00964778;IPI00302047;IPI00760909;IPI00965942;IPI00964956;IPI00922832;IPI00939354;IPI00973910;IPI00963971;IPI00967889;IPI00967353;IPI00966414	84.942	791	791;769;756;754;708;695;694;686;595;772;750;693;647;636;590;436;393;301;431;423;288;203;181;430;304;156;150;149;82	1.5015e-121	0.92523	0.84973	0.99398	0.88695	0.89001	1.093
IPI00967467;IPI00218319;IPI00909961;IPI00479185;IPI00382894;IPI00218320;IPI00642042;IPI00854592;IPI00643370;IPI00183968;IPI00477649;IPI00645055;IPI00647245;IPI00640264	33.222	285	285;248;203;248;248;247;232;183;158;285;247;243;158;233	3.704e-105	1.0655	0.93518	0.95458	0.89159	0.89017	1.0562
IPI00395627;IPI00552308;IPI00940004	26.21	228	228;201;200	8.9562e-36	1.0233	0.96559	1.1278	1.0255	0.8902	1.0312
IPI00009542;IPI00337823;IPI00477809;IPI00941467;IPI00549529;IPI00910881;IPI00909974	64.953	606	606;588;588;550;521;520;229	4.0071e-22	0.96458	0.81106	0.84635	0.88527	0.89139	0.99087
IPI00026625;IPI00376609;IPI00965680	155.2	1391	1391;1332;1327	1.5714e-10	0.93089	1.0385	1.067	1.0103	0.89153	0.91892
IPI00293276	12.476	115	115	1.9527e-08	0.776	0.80596	0.89373	0.9381	0.89172	0.97623
IPI00024911;IPI00654800;IPI00873931	28.993	261	261;53;53	2.2931e-81	1.0071	0.94209	1.0114	0.98456	0.89208	0.94014
IPI00026182;IPI00873113;IPI00908400	32.949	286	286;286;209	1.4861e-15	0.916	0.93449	0.94084	0.6275	0.89213	1.3876
IPI00784366;IPI00784156;IPI00790702;IPI00909735	105.69	951	951;937;880;340	4.0626e-29	1.0366	1.0191	0.97039	0.88558	0.89247	1.0264
IPI00060181;IPI00031091;IPI00552365;IPI00916914;IPI00915909;IPI00917888	26.697	240	240;239;177;143;127;81	5.7525e-05	0.94169	0.90191	0.9732	0.93531	0.89302	1.0064
IPI00011229;IPI00853455;IPI00892793	44.552	412	412;379;189	5.9033e-07	0.96388	0.99659	1.0693	0.93238	0.89322	0.92815
IPI00219160	13.293	117	117	3.0565e-15	0.96141	0.86863	0.93294	0.95304	0.89352	1.0985
IPI00025329	23.466	196	196	7.04e-48	0.95519	0.98132	0.95293	0.89452	0.89443	0.94041
IPI00024175;IPI00218372;IPI00647380;IPI00154509;IPI00748423;IPI00219950	27.887	248	248;178;191;256;250;212	5.3789e-14	0.9792	0.88095	0.93863	0.88029	0.89473	1.0889
IPI00219153;IPI00878392;IPI00879364	14.787	128	128;95;80	3.5576e-74	1.0134	1.0836	1.0267	0.93341	0.89582	1.036
IPI00026202;IPI00872093;IPI00847774;IPI00909746	20.762	176	176;176;154;147	4.0143e-24	0.94689	0.88634	0.79816	0.80427	0.89655	0.97321
IPI00746777;IPI00966735;IPI00964823	39.724	374	374;262;115	6.9746e-37	0.95488	0.93652	1.0004	1.0079	0.89752	0.93504
IPI00744692	37.54	337	337	5.953e-56	0.93907	0.93134	0.95759	0.96809	0.89793	1.0429
IPI00303568;IPI00947368;IPI00514138;IPI00395565	41.943	377	377;309;265;186	3.2108e-29	0.94401	0.85361	0.90034	1.1041	0.89859	0.8093
IPI00002966;IPI00031022	94.33	840	840;148	3.6894e-210	0.96823	0.92853	0.96734	1.0469	0.89882	0.95019
IPI00215997;IPI00657796;IPI00795937;IPI00908644;IPI00556460	25.416	228	228;159;133;249;182	2.1368e-23	0.98528	0.80918	0.86775	0.82176	0.89921	1.1716
IPI00021840;IPI00643522;IPI00640929;IPI00382475	28.68	249	249;218;91;79	1.8177e-97	0.95485	0.94618	0.96367	0.99432	0.89979	0.9537
IPI00029012	166.57	1382	1382	1.986e-52	0.9651	0.84798	0.90166	0.95911	0.8998	0.92569
IPI00026185;IPI00642256;IPI00218782;IPI00646047;IPI00647677	31.35	277	277;272;335;260;206	4.5662e-134	1.0346	0.95532	0.94023	0.8533	0.90014	1.0035
IPI00020075;IPI00790966	33.932	306	306;205	0.0019622	0.96296	1.9742	1.9934	0.94349	0.90053	0.87967
IPI00930416;IPI00786897	13.952	125	125;232	4.1916e-10	0.91258	0.93222	1.0306	1.058	0.90134	0.88059
IPI00847689;IPI00784029;IPI00383665	30.13	276	276;242;133	2.8286e-17	1.0755	1.0738	0.98531	0.79143	0.90215	1.1316
IPI00175416;IPI00783616;IPI00889624;IPI00848061;IPI00947101	189.22	1693	1693;1655;1014;1002;991	0.00018452	0.98922	0.92244	0.90134	0.96299	0.90238	1.0128
IPI00304992;IPI00843984	62.554	646	646;609	4.4398e-05	0.85345	1.0162	0.92586	1.5837	0.90255	NaN
IPI00301311;IPI00896523;IPI00844040;IPI00917753;IPI00887938;IPI00888355	32.103	277	277;268;267;265;385;358	0	0.94506	0.97975	0.97298	1.0435	0.90311	0.77089
IPI00024403	60.13	537	537	0.00016413	0.97264	0.96241	0.91451	1.0764	0.90358	0.80756
IPI00219155;IPI00790294;IPI00792879	15.798	136	136;80;40	7.432e-19	1.0117	1.0962	0.99521	0.96619	0.90361	0.93611
IPI00910816;IPI00013830	65.459	571	571;536	4.3424e-09	0.94131	0.88731	0.899	0.99653	0.90379	0.97831
IPI00856098;IPI00215743;IPI00220967;IPI00744135	165.71	1540	1540;1410;1407;977	3.7995e-42	0.96674	0.9479	1.0194	0.95834	0.90382	0.94071
IPI00794659;IPI00012493;IPI00791265;IPI00794061;IPI00795919	16.005	142	142;119;61;64;38	2.7608e-32	0.94656	0.89256	0.93425	0.94796	0.90395	0.9603
IPI00759799;IPI00788684;IPI00025292;IPI00792565;IPI00798419;IPI00105068;IPI00796533;IPI00789868	32.005	299	299;259;247;211;192;126;109;75	0.00052216	0.97592	0.98181	0.95373	0.94155	0.9044	0.92931
IPI00293078	89.834	796	796	3.778e-43	1.019	0.89309	0.83101	0.97178	0.90445	0.97436
IPI00939304;IPI00793443;IPI00937471;IPI00514622	125.54	1115	1115;1097;1037;1105	1.3411e-154	1.0472	0.90247	0.90684	0.88964	0.90447	1.0122
IPI00848226;IPI00964877;IPI00965459;IPI00964790;IPI00966111;IPI00967792;IPI00967322;IPI00967577;IPI00964515;IPI00966041;IPI00967345;IPI00964313;IPI00964025;IPI00910724;IPI00967585;IPI00965193;IPI00965671;IPI00910221;IPI00966919;IPI00965503	35.076	317	317;274;273;247;321;269;300;237;198;194;138;233;226;221;160;101;198;153;147;83	6.8384e-98	1.021	0.90788	0.92296	0.95715	0.90451	0.99286
IPI00237884;IPI00867627;IPI00940222	191.48	1782	1782;1684;1677	3.0098e-82	0.97517	0.75027	0.82182	0.87886	0.90477	0.9664
IPI00793199;IPI00872780	36.085	321	321;299	5.7119e-19	1.0182	0.84518	0.79421	0.73976	0.9049	1.34
IPI00298961;IPI00893013	123.38	1071	1071;1070	8.6703e-51	1.0002	0.89524	0.93292	0.86369	0.90507	0.96468
IPI00015842	38.89	331	331	7.997e-222	0.98894	1.0345	1.0129	0.99273	0.90622	0.98558
IPI00789041	81.613	717	717	0.00015108	0.92134	0.8189	0.92527	0.98382	0.90623	1.0067
IPI00026689;IPI00955014;IPI00073536;IPI00954937	34.778	303	303;297;240;109	4.6053e-28	0.90052	0.87145	0.9408	0.9561	0.90632	0.99243
IPI00290952;IPI00032374	84.427	758	758;740	0.0031227	1.0217	0.89048	0.85437	1.0605	0.90639	0.84092
IPI00026215	42.592	380	380	1.9516e-80	1.046	1.0326	0.94863	0.93095	0.90649	0.98872
IPI00304171;IPI00059366;IPI00744148;IPI00966623;IPI00910098	39.617	372	372;371;369;165;200	7.9079e-10	0.90623	0.79609	0.89948	0.97366	0.90672	0.97149
IPI00002745	33.868	303	303	0.00011855	1.027	0.82493	0.84266	0.86276	0.90763	1.115
IPI00964409;IPI00295485;IPI00964684	91.953	813	813;868;531	1.0649e-120	0.89097	0.77563	0.98717	0.78252	0.90765	1.1569
IPI00299024;IPI00908521	22.693	227	227;173	0	0.92608	0.92019	0.94505	0.93482	0.90771	0.97657
IPI00430803	15.805	140	140	0.0023035	0.96446	0.94717	0.974	1.0166	0.90804	0.89463
IPI00020436;IPI00429190;IPI00941638;IPI00930720;IPI00911020;IPI00795676	24.488	218	218;261;216;179;146;198	4.6468e-31	1.0698	0.94973	0.91252	0.94338	0.90805	1.0809
IPI00793381;IPI00014151;IPI00794383;IPI00946249;IPI00795037;IPI00945689;IPI00794344	51.922	442	442;389;351;350;290;226;189	3.9384e-17	1.0423	0.8543	0.79588	0.83593	0.90823	0.979
IPI00789101;IPI00789698;IPI00015029;IPI00908647;IPI00790462;IPI00910575;IPI00910005	19.448	165	165;163;160;139;130;127;124	1.372e-210	1.0038	0.96513	0.98053	0.91832	0.90827	1.0318
IPI00027834;IPI00465225	64.132	589	589;456	0	1.0088	0.94294	0.86735	0.77428	0.90831	1.085
IPI00419919;IPI00796934;IPI00019208;IPI00173589;IPI00792866;IPI00792336;IPI00052885;IPI00793936;IPI00798109;IPI00879331;IPI00945894	17.752	159	159;159;155;155;246;232;209;69;60;53;37	3.5808e-53	1.0051	0.872	0.88169	0.87999	0.90837	1.0594
IPI00026516;IPI00964493;IPI00967390	56.157	520	520;334;123	3.9027e-23	1.0223	0.88881	0.92583	0.91627	0.90865	1.139
IPI00291755;IPI00871723	205.11	1887	1887;967	6.2055e-21	1.0426	0.98929	1.0128	0.90983	0.90869	0.96376
IPI00003935;IPI00152785;IPI00220403;IPI00515061;IPI00454695;IPI00746251;IPI00465363	13.92	126	126;126;126;126;193;164;127	3.6151e-21	1.0897	0.93803	0.85968	0.88569	0.9087	1.0708
IPI00965238;IPI00020454;IPI00966824	36.764	317	317;260;199	0.00097804	1.2554	1.0127	0.78719	0.78839	0.90884	1.2115
IPI00554737;IPI00908543;IPI00910732;IPI00168184;IPI00798040;IPI00910515	65.308	589	589;555;534;509;410;156	2.245e-70	1.0563	0.90986	0.83246	0.81764	0.90884	1.0753
IPI00032881	21.77	190	190	1.4167e-08	0.97739	0.92086	0.89275	1.0506	0.90891	0.88492
IPI00017726;IPI00336094;IPI00639797	26.923	261	261;252;169	3.6869e-30	0.97967	0.89745	0.95073	0.94329	0.90892	0.98058
IPI00414384;IPI00031107	45.394	418	418;345	5.0942e-08	0.98865	0.94418	0.99196	0.89051	0.90924	1.0717
IPI00291467;IPI00645646;IPI00022891	32.866	298	298;158;298	3.9774e-77	1.0379	0.87353	0.91032	0.98352	0.90924	1.0671
IPI00329625;IPI00940204;IPI00477123;IPI00945791;IPI00946301	71.856	642	642;631;521;283;248	4.2614e-05	1.0569	0.98311	0.87314	0.88762	0.90925	0.94506
IPI00072534;IPI00735181;IPI00909477	103.08	944	944;929;332	1.855e-26	1.1212	1.0965	0.99703	1.0235	0.9093	0.95327
IPI00745125;IPI00644020	64.734	550	550;260	3.0053e-70	0.92824	0.83309	0.90513	0.80602	0.90965	1.0838
IPI00655650;IPI00401819;IPI00477550;IPI00795435;IPI00479543;IPI00187140;IPI00787644;IPI00797875	13.015	115	115;115;115;115;283;115;115;75	4.7545e-26	0.94949	0.85361	0.94708	0.93029	0.90985	0.92105
IPI00014516;IPI00218694;IPI00925125;IPI00218695;IPI00218696;IPI00816770;IPI00333771;IPI00926274	93.249	793	793;564;563;558;543;536;532;459	3.729e-53	1.0102	0.90542	0.97979	0.95205	0.91001	0.95457
IPI00645898;IPI00607814;IPI00793375;IPI00514564;IPI00642642;IPI00641670	74.797	666	666;642;623;233;202;179	6.0498e-28	0.94899	0.91778	1.1217	1.1667	0.91002	0.92413
IPI00257882;IPI00910514;IPI00909399	54.548	493	493;452;429	0.0029273	1.033	0.82353	0.78544	0.9704	0.91039	1.0403
IPI00973811;IPI00217236;IPI00973785;IPI00909626;IPI00974205	14.306	119	119;108;79;129;62	1.9032e-09	0.99711	0.95371	0.99374	1.0023	0.91043	1.0067
IPI00409590;IPI00409591;IPI00409593;IPI00552510;IPI00291802;IPI00641430	192.69	1683	1683;1670;1614;1398;1349;1046	8.1616e-13	0.93431	0.91677	0.94951	0.92902	0.91148	1.0728
IPI00798011;IPI00909492;IPI00793687;IPI00299147;IPI00299149;IPI00434968;IPI00973977;IPI00790142;IPI00745893	16.956	147	147;141;135;103;95;95;95;91;71	2.3335e-09	0.93403	0.97169	1.0193	1.071	0.91188	0.88464
IPI00020021;IPI00909779;IPI00942944;IPI00968273;IPI00967473	42.674	375	375;347;341;151;122	3.0141e-31	1.0123	0.98615	0.99672	1.0993	0.91193	0.93251
IPI00009841;IPI00872855;IPI00879259;IPI00879242;IPI00065554;IPI00293254;IPI00953325;IPI00878484	68.965	661	661;656;655;618;600;583;583;308	4.0815e-51	0.96333	0.87684	0.88215	0.91718	0.91196	0.94779
IPI00217465;IPI00217466;IPI00217467;IPI00419983;IPI00217469	21.364	213	213;221;219;221;215	1.6707e-17	0.95969	0.89211	0.91501	0.91635	0.912	1.0165
IPI00004962;IPI00945220;IPI00794742	81.879	696	696;668;98	1.5284e-17	1.501	0.83788	0.6761	0.71793	0.91208	1.2228
IPI00867714;IPI00410324;IPI00749127;IPI00909229	21.999	198	198;195;137;113	1.1167e-19	0.84184	0.75922	0.94258	0.9257	0.91238	0.79617
IPI00006079;IPI00413671;IPI00886854;IPI00413672;IPI00886987;IPI00413673	106.12	920	920;918;876;869;876;747	1.1413e-42	0.97389	0.90448	1.0121	1.0109	0.91256	0.94198
IPI00218728;IPI00873228;IPI00909586;IPI00953036;IPI00760905	46.637	410	410;410;205;201;147	2.6917e-13	1.032	0.97896	0.95696	0.75763	0.91293	1.1763
IPI00220219;IPI00789674;IPI00966209	102.49	906	906;877;118	2.4465e-36	1.0578	1.0043	0.99595	1.0761	0.9135	1.0243
IPI00221035;IPI00419473;IPI00965254;IPI00015946;IPI00967045;IPI00258884;IPI00015945	22.168	206	206;162;109;214;85;107;67	1.0801e-126	1.0202	1.0748	1.049	1.0366	0.91364	1.0103
IPI00844264;IPI00973794;IPI00470891;IPI00873244	93.741	844	844;813;798;767	4.8634e-38	1.1522	0.90463	0.84794	0.95799	0.91379	0.92975
IPI00414127;IPI00878075;IPI00878950;IPI00878611;IPI00878440;IPI00879666;IPI00878795;IPI00879160	23.31	201	201;200;204;248;166;205;53;128	1.6318e-29	0.98006	0.97962	0.91045	0.92789	0.9141	0.92417
IPI00024642;IPI00743775	55.873	483	483;480	0.0024303	0.97917	0.96184	0.96655	0.90493	0.91426	0.9869
IPI00306825;IPI00221178;IPI00399265;IPI00399267;IPI00743469;IPI00399266;IPI00399268	22.237	206	206;186;229;220;219;209;200	4.1469e-19	0.98189	0.82893	0.76617	0.82155	0.91556	1.0746
IPI00184546	11.748	116	116	1.3431e-12	1.2293	0.94879	0.74594	0.88195	0.91578	1.117
IPI00470596;IPI00607784;IPI00178953;IPI00607883	220.62	1978	1978;1957;1139;1024	1.0942e-09	1.0852	0.9674	0.93491	0.97469	0.91623	0.95094
IPI00024661	118.32	1094	1094	2.3445e-05	0.88694	0.8923	1.1157	0.9929	0.91628	0.90228
IPI00853598;IPI00375370;IPI00479141;IPI00789755;IPI00789169;IPI00845335;IPI00795464	40.746	368	368;325;322;308;254;309;272	1.6249e-68	0.98594	0.98265	1.0074	0.93499	0.91664	0.91656
IPI00479217;IPI00644224;IPI00963858	88.979	806	806;784;242	8.8672e-238	1.0593	0.75512	0.69427	1.0393	0.91708	1.2029
IPI00419258;IPI00645948;IPI00644653;IPI00018755;IPI00903004;IPI00742929;IPI00788220;IPI00737736;IPI00022796;IPI00879051;IPI00643746;IPI00418184	24.893	215	215;216;158;211;176;171;224;223;211;129;97;191	1.9938e-78	0.96707	0.88422	0.97958	0.93779	0.91733	0.96507
IPI00009032;IPI00916802;IPI00916922;IPI00917386;IPI00917205	46.836	408	408;361;184;120;134	6.8089e-18	1.0514	0.95143	0.92522	0.96669	0.91734	1.0024
IPI00220835	9.9743	96	96	0.0010805	0.99559	0.92311	0.99857	0.96661	0.91742	0.98593
IPI00008380;IPI00815784;IPI00429689;IPI00973884	35.594	309	309;309;309;91	0.00024025	1.5058	1.0787	0.74127	1.1655	0.91765	0.81422
IPI00418169;IPI00455315;IPI00334627;IPI00797556;IPI00903334;IPI00909509;IPI00798111;IPI00795925	40.411	357	357;339;339;219;181;194;69;62	0	1.0074	0.84385	0.8634	0.83322	0.91843	1.0455
IPI00299507;IPI00925237;IPI00927291;IPI00924630;IPI00926197	82.562	741	741;730;605;608;182	9.8667e-30	1.0196	0.98834	0.96859	1.0431	0.91892	0.87818
IPI00332499;IPI00179953;IPI00219821;IPI00646459;IPI00639912;IPI00514504	86.267	790	790;788;449;422;262;258	3.926e-70	1.0022	0.88514	0.90971	0.9311	0.91915	0.97939
IPI00916111;IPI00915869;IPI00916861;IPI00952583;IPI00916253	38.655	352	352;210;169;222;120	1.2368e-187	0.94058	0.93116	0.97817	0.97134	0.91956	0.97865
IPI00169430;IPI00413860	73.652	672	672;658	4.9851e-07	1.0215	0.90372	0.91157	0.91517	0.92022	1.0013
IPI00009822;IPI00929464;IPI00736168	55.704	504	504;455;168	2.5545e-07	1.0444	1.0162	0.97976	1.0167	0.92079	0.9321
IPI00872664;IPI00219913;IPI00640357	59.929	532	532;494;459	3.9628e-32	0.88144	0.80824	0.90485	0.86304	0.92089	1.0555
IPI00412579;IPI00035167;IPI00478277	24.831	217	217;215;133	9.8832e-30	1.001	0.93107	0.90522	0.91606	0.92128	0.97986
IPI00329692;IPI00218830;IPI00922811	56.806	496	496;416;137	1.5957e-70	1.0003	0.98128	0.93787	0.93875	0.92143	0.99817
IPI00025091;IPI00748962	18.431	158	158;161	5.9847e-42	1.1397	1.0299	0.85417	0.84873	0.92148	1.2167
IPI00216951;IPI00917783;IPI00917492;IPI00917920;IPI00917399;IPI00917615	57.136	501	501;188;182;179;176;135	0.00059393	1.0052	0.85023	0.91815	0.85512	0.9215	1.1104
IPI00883857;IPI00644079	90.583	825	825;722	2.0133e-256	0.99883	0.9347	0.94428	0.94317	0.922	1.0264
IPI00217468	22.58	226	226	0.00027435	0.9584	0.94178	0.9491	0.9991	0.92236	1.0239
IPI00008475;IPI00963899	57.293	520	520;96	2.2181e-153	0.98033	0.9279	0.88944	0.93196	0.92258	1.0326
IPI00018783	21.445	194	194	4.5975e-05	1.0379	0.84219	0.95684	1.031	0.92269	1.0052
IPI00003438	29.841	253	253	3.4315e-07	0.91022	0.88431	1.0111	1.01	0.92301	1.0607
IPI00784614;IPI00784808;IPI00784936;IPI00871679;IPI00455033;IPI00883870;IPI00784835;IPI00748715	65.401	586	586;579;568;566;422;474;335;341	2.4346e-10	1.0929	0.82778	0.77022	0.7925	0.92311	1.1344
IPI00607584;IPI00005024;IPI00908888	149.37	1332	1332;1328;603	7.5192e-07	0.96588	0.88812	0.92413	0.9061	0.92364	0.9884
IPI00007750;IPI00794663;IPI00335314;IPI00794009;IPI00916823;IPI00797717;IPI00015671;IPI00872463;IPI00879904;IPI00917863;IPI00879535;IPI00916391	49.924	448	448;433;266;198;180;153;446;446;406;120;98;156	0	0.91596	0.84726	0.97181	1.0039	0.92364	0.98303
IPI00477766;IPI00479833;IPI00873415;IPI00872159;IPI00651741;IPI00872355;IPI00658164;IPI00918015;IPI00748340;IPI00953261;IPI00940167;IPI00166804	99.414	887	887;887;887;882;852;852;847;802;481;481;408;310	0.00071569	1.0692	0.87242	0.83554	1.1361	0.92496	0.85576
IPI00016862;IPI00953236;IPI00759575;IPI00953696;IPI00794573	56.256	522	522;493;479;440;187	2.0115e-86	1.0217	0.91678	0.93223	0.88145	0.92526	1.0732
IPI00001661;IPI00787306;IPI00747309;IPI00925791;IPI00926548;IPI00925317;IPI00927389;IPI00925570	48.145	452	452;438;421;283;273;272;230;158	1.3287e-50	0.98424	0.87496	0.86803	0.992	0.92546	1.0906
IPI00926977;IPI00021926;IPI00910829;IPI00178056	45.796	403	403;389;186;389	3.81e-50	1.0026	0.90648	0.98026	0.88501	0.92568	1.0543
IPI00025039	33.784	321	321	5.2393e-12	0.95558	0.98777	1.0581	0.99953	0.9264	0.94039
IPI00376005;IPI00411704;IPI00006935;IPI00946642;IPI00946502;IPI00945644;IPI00855924	20.17	184	184;154;153;115;109;105;154	8.4675e-121	0.99192	0.98975	1.0249	0.98287	0.9265	0.97507
IPI00294891;IPI00654555;IPI00797590	93.982	854	854;845;153	2.1908e-13	1.0685	0.91584	0.84025	0.83666	0.92674	1.1014
IPI00006579;IPI00645361	19.576	169	169;83	1.8001e-21	1.0233	0.95619	0.85911	1.0101	0.92674	0.95891
IPI00641743;IPI00019848;IPI00219326	213.47	2080	2080;2035;1966	0.00015806	1.0142	1.0099	0.87302	0.85872	0.927	1.0178
IPI00374657;IPI00170692;IPI00640416;IPI00929577;IPI00642826	32.613	294	294;249;171;306;125	9.6797e-10	0.95002	0.95646	0.92813	0.92649	0.92734	0.97641
IPI00328154;IPI00375533;IPI00945816;IPI00796261;IPI00917001	51.852	463	463;449;129;117;422	1.2756e-12	0.94819	0.97445	1.0408	0.94417	0.92762	1.0014
IPI00788011;IPI00301364;IPI00974176;IPI00172421;IPI00719311	23.198	209	209;163;163;160;47	2.706e-20	1.1331	0.99946	1.0358	0.96047	0.92766	0.97795
IPI00012837;IPI00909299	109.68	963	963;438	6.0917e-32	0.99609	1.0022	0.95718	0.93565	0.92768	0.97252
IPI00219097;IPI00967671	24.033	209	209;134	7.8882e-17	1.002	0.83834	0.85474	0.93889	0.92801	0.97657
IPI00056357	18.795	173	173	1.2617e-07	1.0465	0.86288	0.75089	0.69682	0.92826	1.1189
IPI00334587;IPI00742926;IPI00964992;IPI00334713;IPI00966854;IPI00964686;IPI00329355;IPI00106509	35.967	332	332;329;327;285;283;280;332;286	8.4398e-147	0.95933	0.93047	0.92665	0.98443	0.92854	0.96818
IPI00103595;IPI00940047;IPI00748061	350.93	3117	3117;3117;1292	0.00065613	0.97389	0.89395	0.89597	0.80989	0.92873	1.2114
IPI00293464;IPI00909008;IPI00909251;IPI00909177	126.97	1140	1140;1009;826;451	9.2723e-127	1.0003	0.92218	0.9606	0.96724	0.92883	0.95276
IPI00643351;IPI00031812;IPI00450235;IPI00031801;IPI00219148;IPI00219147;IPI00555698;IPI00250153;IPI00784202	41.905	374	374;324;322;372;342;303;134;364;346	2.8649e-55	0.98417	0.91547	0.89124	0.94465	0.92894	1.0332
IPI00178440;IPI00164838;IPI00927696;IPI00927920;IPI00926585	24.763	225	225;224;123;68;29	6.9651e-146	1.026	0.95488	0.8716	0.84467	0.92905	1.0721
IPI00789324;IPI00791432;IPI00788705;IPI00790671	62.615	563	563;296;277;235	1.4731e-69	1.0117	0.90174	0.86664	0.80534	0.9293	1.145
IPI00299573;IPI00397676;IPI00478896;IPI00642454	29.995	266	266;266;191;151	1.2006e-113	1.0124	0.96602	0.94352	0.94528	0.92969	1.0193
IPI00003527;IPI00902652;IPI00794755	38.868	358	358;273;239	7.3039e-135	1.029	1.0269	1.0045	0.99921	0.92984	0.97839
IPI00220271;IPI00647702	36.573	325	325;147	1.7666e-26	0.98722	1.0007	1.0106	0.97394	0.92987	0.98556
IPI00304692;IPI00816796;IPI00939558;IPI00552938;IPI00004450;IPI00061178;IPI00643486;IPI00167369	42.331	391	391;378;378;196;392;390;159;1067	1.288e-60	0.98417	0.93841	0.87855	0.82968	0.92993	0.9985
IPI00011876;IPI00942294	33.186	300	300;283	4.694e-07	1.0301	0.92947	0.88654	0.84994	0.93027	1.1882
IPI00419585;IPI00910407;IPI00030144;IPI00455871;IPI00657716;IPI00743690;IPI00937169;IPI00925747;IPI00925411;IPI00479480	18.012	165	165;129;164;164;164;164;160;121;120;160	1.2381e-44	1.0214	0.87505	0.85483	0.87963	0.9307	1.0084
IPI00013296;IPI00397609;IPI00790711;IPI00894147	17.718	152	152;152;143;34	3.4401e-26	1.0449	0.91092	0.86422	0.88178	0.93071	1.0063
IPI00014603;IPI00016372	22.719	201	201;201	0.0020028	0.97311	0.89585	0.97216	1.0831	0.93076	0.97163
IPI00793201;IPI00006252;IPI00910647;IPI00965185	37.039	336	336;312;269;150	1.5153e-41	0.95786	1.0012	1.074	0.90368	0.93137	1.0208
IPI00013485;IPI00165486;IPI00386445;IPI00871956;IPI00877829;IPI00955904;IPI00878284;IPI00878297;IPI00479281;IPI00798353	31.324	293	293;293;203;184;254;178;143;273;242;143	4.3989e-96	0.97313	0.91208	0.91513	0.91888	0.93154	0.98997
IPI00298520;IPI00514053;IPI00915422;IPI00439944	61.626	552	552;511;423;189	1.424e-29	0.94505	0.92835	0.93985	0.9396	0.9323	1.0077
IPI00394749;IPI00165936;IPI00027193;IPI00294443;IPI00844301	73.011	704	704;686;410;251;72	8.1127e-06	1.1626	1.0513	1.0259	1.0249	0.9328	1.0112
IPI00013415;IPI00893703;IPI00478287;IPI00798077;IPI00796554	22.127	194	194;187;194;170;159	1.8895e-50	1.0107	1.0098	1.003	1.0402	0.93288	0.90699
IPI00219005	51.804	459	459	1.6801e-173	1.015	0.92929	0.98599	1.0032	0.93302	0.974
IPI00335449;IPI00939356;IPI00294178;IPI00909011;IPI00973793	73.584	667	667;603;601;474;455	0.0022613	1.0936	0.86677	0.81052	0.70283	0.93322	1.2262
IPI00031696;IPI00964536	75.688	662	662;608	0.0052477	0.96066	1.0441	0.98026	0.94848	0.93333	0.96663
IPI00032313	11.728	101	101	4.406e-10	0.96644	0.93427	0.9397	1.0588	0.93341	0.93173
IPI00000690;IPI00157908;IPI00300018;IPI00910786;IPI00910617	66.9	613	613;609;326;324;261	5.3564e-73	0.93655	0.91247	0.97284	0.91247	0.93361	0.90382
IPI00020956;IPI00514127;IPI00514330;IPI00922032	26.788	240	240;256;233;262	3.443e-189	0.96712	0.94644	1.0728	1.0144	0.93361	1.0207
IPI00645446;IPI00179026;IPI00900380	20.55	182	182;181;169	2.8363e-10	0.95178	0.9584	1.0018	0.91887	0.9337	0.94546
IPI00000015	56.678	494	494	0.00019227	0.98229	0.97207	0.95253	1.0013	0.93372	0.97033
IPI00005969	32.922	286	286	4.6857e-39	1.025	0.90278	0.95113	0.93005	0.93376	1.0045
IPI00013297	20.63	181	181	1.6321e-101	1.0139	0.95716	0.91174	1.0425	0.93411	0.96943
IPI00029601;IPI00062884;IPI00746806;IPI00791680;IPI00792087	61.585	550	550;513;634;223;234	1.0246e-104	1.0439	0.89477	0.88335	0.86976	0.93441	1.1406
IPI00927658;IPI00395998;IPI00927458;IPI00794734;IPI00927895;IPI00927543;IPI00878895;IPI00926827;IPI00878360;IPI00878577;IPI00176451;IPI00797690;IPI00797214	17.962	153	153;135;133;109;93;135;134;62;134;96;82;55;40	1.3773e-60	1.0813	0.94265	0.93583	0.88298	0.93512	1.1036
IPI00397947;IPI00890717;IPI00019599;IPI00030962;IPI00472498;IPI00019600;IPI00514724;IPI00789287;IPI00447356;IPI00797889;IPI00007847;IPI00872898;IPI00965965	42.209	370	370;370;221;170;147;145;105;103;170;149;103;103;89	2.1909e-10	0.95132	0.96111	0.99421	1.0217	0.93534	0.89236
IPI00219675;IPI00010271;IPI00394837	23.467	211	211;192;148	1.7884e-24	0.998	0.98131	1.0046	1.1483	0.93545	0.91231
IPI00909484;IPI00016786;IPI00910473;IPI00007189;IPI00642590	26.528	236	236;191;233;191;136	1.1307e-50	1.0018	0.94241	0.94751	0.9431	0.93585	1.0205
IPI00215611	8.5328	77	77	5.411e-47	1.0438	0.90825	0.84348	0.90377	0.93658	1.1293
IPI00871467;IPI00334532;IPI00646281;IPI00927755	140	1257	1257;1253;1248;151	1.3104e-39	0.99414	0.95406	0.96365	0.87861	0.93667	0.9595
IPI00021828	11.139	98	98	0.00015414	1.0684	0.98572	0.87223	1.5863	0.93675	0.81911
IPI00026089;IPI00917430	145.83	1304	1304;241	6.1556e-34	0.98185	1.0077	0.95103	0.96751	0.9368	0.9841
IPI00221222;IPI00455831;IPI00963960;IPI00930562;IPI00964232	14.395	127	127;127;84;73;66	4.9815e-137	0.98126	0.94427	0.95036	0.87801	0.93687	1.0603
IPI00010860;IPI00790782;IPI00216220;IPI00790097;IPI00791380	24.682	223	223;118;209;111;85	3.5301e-07	1.0273	0.96271	1.0034	0.87931	0.93692	0.95737
IPI00216057;IPI00922510	38.324	357	357;100	5.06e-07	0.97399	0.99693	0.93951	1.0437	0.93745	0.96887
IPI00029623;IPI00867679	27.399	246	246;227	3.3845e-17	1.0452	0.95471	0.87948	0.87322	0.93754	1.0715
IPI00027252;IPI00797822	33.296	299	299;261	0	0.95162	1.0222	1.0039	0.97884	0.93769	0.97655
IPI00022793;IPI00893108;IPI00969375;IPI00893995;IPI00893587	51.294	474	474;351;372;176;150	1.0461e-66	0.97361	1.0168	1.0666	1.0109	0.93787	0.98449
IPI00413641;IPI00556258;IPI00926520;IPI00879481	35.853	316	316;263;102;198	4.4113e-44	0.9823	0.76853	0.92287	1.0572	0.93792	0.94514
IPI00647286;IPI00456750	84.137	746	746;733	1.1426e-22	1.0415	0.91733	0.89023	1.1569	0.93831	0.95472
IPI00479997;IPI00921996;IPI00744618;IPI00643115;IPI00642012;IPI00218667;IPI00795953;IPI00922311	17.302	149	149;174;134;116;86;179;168;126	1.8585e-55	0.95224	0.88181	0.92276	0.91505	0.93832	1.0181
IPI00019376;IPI00967716;IPI00952909;IPI00964937;IPI00878026;IPI00549434;IPI00658113;IPI00550119;IPI00658216;IPI00479741;IPI00871284;IPI00941331;IPI00941473;IPI00248126;IPI00644857;IPI00658185;IPI00022082;IPI00744597;IPI00216139;IPI00376992;IPI00963822;IPI00787280;IPI00893987;IPI00965828;IPI00925967;IPI00967443	50.822	439	439;432;429;425;587;483;460;457;442;440;438;434;433;432;431;430;429;429;427;421;372;369;213;160;130;82	3.1237e-43	0.97895	1.0171	0.98475	1.0403	0.93849	0.92958
IPI00007927;IPI00232806	135.65	1197	1197;1099	6.4145e-06	1.06	0.95855	0.95053	0.93459	0.9385	1.1563
IPI00219301	31.554	332	332	9.6916e-151	0.9861	0.89329	0.91957	1.0196	0.93852	0.96166
IPI00221092;IPI00450975;IPI00397701	16.445	146	146;152;146	3.7593e-145	1.0352	0.91476	0.89127	0.86467	0.93885	1.0912
IPI00030654;IPI00012998;IPI00647126;IPI00910864;IPI00797184	63.47	588	588;551;479;301;151	9.2328e-35	0.92423	0.90959	1.0252	0.99487	0.9389	0.94024
IPI00007940;IPI00936931	39.171	348	348;346	5.4828e-16	1.0498	0.95558	0.84045	1.001	0.93979	0.95907
IPI00396378;IPI00916517;IPI00414696;REV__IPI00144293;REV__IPI00376222	37.429	353	353;317;341;727;709	4.3307e-241	1.0184	0.95544	0.95873	0.9583	0.93985	1.0223
IPI00219910;IPI00783862	22.19	207	207;206	1.787e-06	1.0283	0.95565	1.117	1.0883	0.93987	0.82389
IPI00294879;IPI00879681;IPI00879993;IPI00877824	63.541	587	587;253;133;100	3.116e-120	0.97458	0.95085	0.97651	0.97569	0.94	0.99744
IPI00016669;IPI00947020;IPI00945139	20.497	184	184;79;19	0.0027903	1.0393	0.97284	0.98622	1.079	0.94034	0.91437
IPI00450472;IPI00032957	20.457	184	184;158	5.0112e-06	0.9769	0.93269	0.90554	0.89594	0.94062	0.96839
IPI00456758	16.561	148	148	1.524e-56	1.0582	0.86414	0.84816	0.86122	0.94107	1.128
IPI00013894;IPI00479946;IPI00908463	62.639	543	543;590;519	0	0.9911	0.94323	0.95351	0.93416	0.94122	1.0192
IPI00171438;IPI00939560	47.628	432	432;324	1.2497e-89	1.0126	0.97343	0.97676	1.0086	0.94124	0.94703
IPI00031691;IPI00968128;IPI00965303;IPI00966707;IPI00795717;IPI00910195;IPI00909133;IPI00719047;IPI00967876;IPI00795310;IPI00878105;IPI00789747	21.863	192	192;189;182;166;165;168;147;192;91;86;105;65	2.7908e-186	1.0046	0.95626	0.93667	0.91799	0.94141	1.0545
IPI00745568;IPI00641815	31.444	272	272;178	4.6763e-08	0.99032	1.0865	1.071	0.99422	0.94142	0.97717
IPI00029468;IPI00908883;IPI00029469;IPI00917682	42.613	376	376;335;376;147	1.6965e-10	0.96095	0.96401	0.99814	0.93419	0.94176	1.0427
IPI00219103;IPI00219344;IPI00395510;IPI00470800	22.427	193	193;193;193;175	0	0.95761	0.96853	0.89134	0.95924	0.94252	0.95914
IPI00913938;IPI00301107;IPI00965867	117.01	1015	1015;975;160	1.3185e-05	0.95743	1.0298	1.0821	1.0354	0.9429	1.0146
IPI00022597	20.9	183	183	5.2915e-08	0.96715	0.95792	1.0457	0.86849	0.94304	1.0739
IPI00006932;IPI00216804	54.223	458	458;391	1.2971e-79	0.98762	0.97356	0.97452	1.0242	0.94321	0.97271
IPI00890743;IPI00012970;IPI00890827	38.946	342	342;305;283	2.6718e-06	1.0615	0.9582	0.90716	1.0021	0.94352	0.99135
IPI00419916;IPI00956631;IPI00643764;REV__IPI00789837;REV__IPI00893576;REV__IPI00383061;REV__IPI00641739;REV__IPI00854610;REV__IPI00329085;REV__IPI00647281	57.304	524	524;472;447;1866;1864;1837;1551;1356;1329;720	5.0151e-85	1.0595	0.99202	0.93972	0.9203	0.94362	1.0312
IPI00383581;IPI00011454	112.92	995	995;966	1.6212e-35	1.0031	1.0454	1.0899	1.0114	0.94377	1.026
IPI00329600;IPI00641681	47.151	429	429;241	6.5885e-12	1.0074	0.99828	1.0466	0.81956	0.94441	1.1246
IPI00032853	7.7059	64	64	9.5705e-09	0.96485	1.021	1.11	1.0175	0.94474	0.82958
IPI00216952;IPI00021405;IPI00216953;IPI00644087;IPI00514320;IPI00514817;IPI00655812;IPI00965833;IPI00514204;IPI00910241;IPI00965567;IPI00965461	65.134	572	572;664;634;614;513;491;487;565;465;574;182;260	0	1.008	0.98792	0.95006	0.96785	0.94475	0.98642
IPI00477231;IPI00181391;IPI00941608;IPI00465449	111.18	998	998;863;849;677	3.8614e-18	0.97976	0.98685	1.0355	0.94064	0.9449	1.0148
IPI00018522;IPI00382516;IPI00215734;IPI00914913;IPI00549813;IPI00747005;IPI00909470;IPI00795978	42.461	371	371;353;347;343;394;385;293;208	1.0546e-43	0.97506	0.90237	0.89939	0.91067	0.94511	0.91337
IPI00514424;IPI00002412;IPI00973872;IPI00514248;IPI00908718	37.131	335	335;306;271;232;203	0.00055127	0.96561	0.97973	1.0797	1.3599	0.94544	0.82947
IPI00032406	45.745	412	412	9.7604e-84	0.93577	0.96127	1.1043	0.91323	0.94585	1.0712
IPI00329791;IPI00939523	117.47	1032	1032;1032	1.348e-08	0.98698	0.89875	0.93009	0.99098	0.94597	0.9813
IPI00220344;IPI00790743;IPI00968305;IPI00917181;IPI00056494;IPI00877709;IPI00896410;IPI00917341	16.378	142	142;138;118;112;106;77;77;70	8.4845e-08	0.92761	0.90738	0.97943	1.0363	0.94598	0.89993
IPI00017451;IPI00470590	88.885	793	793;728	1.0996e-85	1.0253	0.93187	0.97561	0.99596	0.94613	0.94176
IPI00021766;IPI00894213;IPI00477663;IPI00478442;IPI00298289;IPI00969517;IPI00894099;IPI00219207;IPI00873380	129.93	1192	1192;986;960;392;373;234;203;199;199	6.0591e-32	1.001	0.84373	0.81438	0.94056	0.94618	1.0925
IPI00010157;IPI00916229;IPI00916889;IPI00909932;IPI00021772;IPI00909877	43.66	395	395;299;213;176;395;115	4.1084e-61	1.0091	1.0739	1.006	0.92301	0.94669	1.0791
IPI00974209;IPI00514399;IPI00397358;IPI00420117;IPI00879531;IPI00746004;IPI00930154;IPI00847956	9.461	84	84;66;148;97;84;84;83;70	6.0843e-10	1.0108	0.95665	0.90752	0.98403	0.94684	0.93859
IPI00909195;IPI00027397;IPI00607884;IPI00909743;IPI00607796	23.025	218	218;190;174;209;127	1.4854e-26	0.98718	1.0081	0.94969	0.96054	0.94694	0.97567
IPI00921428;IPI00020906;IPI00974011;IPI00974104;IPI00791997;IPI00974167;IPI00974217;IPI00790217	36.694	336	336;277;181;153;198;174;126;109	1.2154e-06	0.73454	0.98024	1.3967	0.78014	0.94704	1.1761
IPI00001639;IPI00922792	97.169	876	876;660	1.268e-66	1.0567	0.92313	0.94513	0.98874	0.94719	1.13
IPI00414554	16.941	153	153	2.7769e-05	1.0038	0.97344	0.98943	0.97782	0.94742	0.91325
IPI00006482;IPI00646182;IPI00414005;IPI00744194;IPI00788782;IPI00008161;IPI00872242;IPI00375339;IPI00003021;IPI00302840;IPI00640401;IPI00647102;IPI00908591;IPI00647099	112.89	1023	1023;1023;681;149;1226;1045;1039;1029;1020;1013;1009;920;723;477	1.7871e-25	0.93864	0.95998	0.99965	1.0029	0.94755	0.93172
IPI00007321;IPI00398727;IPI00909991;IPI00797535	28.279	263	263;214;196;87	0.00049111	1.0556	0.88108	0.75908	0.76427	0.94759	1.2338
IPI00016801;IPI00027146;IPI00746092	61.397	558	558;558;299	3.3377e-19	1.0034	1.0015	0.98903	0.96983	0.94763	0.98028
IPI00470779	61.89	546	546	2.3804e-07	0.92487	0.83389	0.93859	1.0227	0.94774	1.0449
IPI00029997	27.547	258	258	2.6741e-11	1.0109	0.9784	1.0556	1.0155	0.94779	1.0236
IPI00218848	8.3076	72	72	3.1364e-25	0.96742	1.0013	0.98646	0.93838	0.9485	1.0139
IPI00027032;IPI00646978	24.737	231	231;208	3.1971e-05	1.0256	1.0243	1.0572	0.97855	0.94864	0.91163
IPI00018465;IPI00552072;IPI00952607;IPI00952671;IPI00916908	59.366	543	543;501;499;456;83	2.1945e-94	0.99107	1.0519	1.0255	1.0942	0.94886	0.94423
IPI00010951	555.61	5090	5090	1.0036e-81	1.0236	0.97373	0.95839	0.97337	0.94899	0.99365
IPI00396967;IPI00743342	44.205	389	389;279	0.0044233	0.9168	1.0032	1.1297	1.0382	0.94945	0.85671
IPI00008274;IPI00639931;IPI00939159;IPI00646869;IPI00645789;IPI00644589;IPI00641881;IPI00647351;IPI00644109;IPI00646269;IPI00642414;IPI00514858	51.901	475	475;474;433;215;263;208;203;202;180;176;174;145	4.0214e-194	1.0005	0.93361	0.94317	0.9759	0.94946	1.0328
IPI00012578;IPI00946316;IPI00299033	57.886	521	521;170;521	7.1834e-44	0.93619	1.0072	1.0035	1.0279	0.94985	0.9299
IPI00299608;IPI00456695;IPI00916632;IPI00916809	105.84	953	953;922;203;164	1.8116e-30	1.0555	0.95764	0.97336	0.98337	0.94994	0.93059
IPI00073713;IPI00910884;IPI00792475;IPI00167806;IPI00798190	35.196	328	328;324;255;251;99	9.3474e-05	1.0122	0.99628	0.94963	1.1676	0.94996	0.89076
IPI00171903;IPI00383296;IPI00555833;IPI00386418;IPI00555987	77.515	730	730;691;600;576;188	5.4423e-257	0.95824	1.009	1.0032	0.88934	0.94998	1.0116
IPI00032460	10.834	95	95	0.00092182	1.03	0.91723	0.86822	0.94761	0.95008	1.0586
IPI00333215;IPI00922871;IPI00974396;IPI00974100	33.969	301	301;117;90;47	0.00019952	1.018	0.9473	0.90027	0.81609	0.95018	1.1277
IPI00219616;IPI00718888;IPI00218371;IPI00219617;IPI00552495;IPI00643000;IPI00917032	34.834	318	318;321;318;318;218;168;314	2.7418e-82	0.9676	0.94121	0.95092	0.97625	0.95022	1.0154
IPI00759644	9.8981	89	89	1.0917e-42	0.93037	1.0061	1.0427	0.94868	0.95078	0.97315
IPI00022462;IPI00924935;IPI00790745;IPI00925162;IPI00790126	84.87	760	760;679;113;81;55	1.7175e-262	0.99248	0.92688	0.92847	0.985	0.9509	1.0191
IPI00251559;IPI00947211;IPI00946858;IPI00945996	113.98	977	977;181;145;99	2.2559e-10	0.94308	0.94479	0.97943	0.98291	0.95125	0.9243
IPI00029764;IPI00908449	58.848	501	501;448	1.3949e-94	1.003	0.88829	0.91328	0.86495	0.95135	1.1416
IPI00018398	49.203	439	439	1.7557e-134	0.99902	0.91699	0.94271	0.8949	0.95152	1.0123
IPI00219825;IPI00744835;IPI00873020;IPI00873201;IPI00012503;IPI00556640	61.692	559	559;527;527;526;524;240	4.9153e-76	1.0228	0.92293	0.96055	0.97839	0.95157	1.0211
IPI00413324;IPI00644171;IPI00394699;IPI00874214;IPI00455067;IPI00878444;IPI00844321;IPI00642149	21.397	184	184;184;129;91;282;114;102;81	4.2013e-157	1.0306	0.96163	0.95199	0.97491	0.95175	0.99906
IPI00419249;IPI00171199	28.433	255	255;248	2.0115e-29	0.97077	0.8684	0.92692	0.94371	0.95182	0.99258
IPI00216691;CON__P02584	15.054	140	140;140	2.5709e-134	1.1222	0.86713	0.87872	0.78401	0.95194	1.2098
IPI00604620;IPI00444262;IPI00183526;IPI00916188;IPI00917429;IPI00916991;IPI00916036	76.613	710	710;603;482;297;166;151;141	0	0.98808	0.9082	0.9307	0.94205	0.9521	1.0551
IPI00012007;IPI00935818	47.716	432	432;404	6.1708e-52	1.0068	0.96784	0.98753	0.97013	0.95218	1.0107
IPI00412792;IPI00844417	17.27	158	158;100	1.0112e-50	0.98913	0.95758	0.9655	1.0186	0.95227	0.91656
IPI00299000;IPI00794875;IPI00807557;IPI00790307;IPI00793498;IPI00798341;IPI00789039;IPI00796006	43.786	394	394;372;406;187;187;72;65;39	2.7219e-89	0.98183	1.0914	1.0478	1.0283	0.95246	1.0049
IPI00329633;IPI00908949;IPI00910719;IPI00967989;IPI00966149;IPI00966670;IPI00966983;IPI00965253;IPI00965896;IPI00965598	83.434	723	723;756;602;129;131;118;50;66;56;55	7.9318e-135	0.99985	0.89903	0.88304	0.88551	0.95265	1.0073
IPI00016342;IPI00945574;IPI00945735;IPI00945337;IPI00946911;IPI00946776;IPI00945392;IPI00792578;IPI00791850;IPI00795370	23.489	207	207;160;150;134;116;98;91;94;83;78	3.3605e-72	0.98616	0.98417	1.0051	0.98733	0.95287	0.96404
IPI00216047;IPI00150057;IPI00789967;IPI00470387	132.88	1214	1214;1130;106;105	1.2671e-32	0.94855	0.89776	0.90455	0.92326	0.95297	1.0246
IPI00796333;IPI00465439;IPI00922665	45.26	418	418;364;206	0	0.98526	0.93814	0.95028	0.93493	0.95311	1.031
IPI00376756;IPI00217477;IPI00640781;IPI00643317;IPI00411540;IPI00888596;IPI00374293;IPI00941696;IPI00744556;IPI00006437	23.744	208	208;200;193;188;153;208;182;194;127;73	2.1943e-20	1.0303	0.93395	0.9436	0.90444	0.95314	1.0382
IPI00219604;IPI00797850	43.439	393	393;367	1.1253e-10	0.99601	0.85059	0.88956	0.87443	0.95345	1.046
IPI00021728;IPI00176637;IPI00816442	38.388	333	333;327;89	6.8051e-110	1.0065	0.88896	0.91938	0.93613	0.95351	1.0067
IPI00465361;IPI00397611	24.261	211	211;211	9.2183e-143	0.97114	0.94876	0.99136	0.9332	0.95514	0.97401
IPI00005154	81.074	709	709	1.6222e-09	0.91657	1.0662	1.2392	1.0574	0.95527	0.897
IPI00012011;IPI00909841	18.502	166	166;112	3.4816e-259	1.0451	0.99626	0.94556	0.97973	0.95531	0.97632
IPI00032050;IPI00797202;IPI00789465;IPI00909894;IPI00797789;IPI00910281	28.087	261	261;257;239;217;216;210	0.0015588	1.0069	1.2113	1.36	0.99738	0.95548	1.0388
IPI00001539	41.924	397	397	1.931e-43	0.99079	0.97104	1.0025	0.95021	0.95556	1.0351
IPI00794221;IPI00295624;IPI00003406;IPI00965597;IPI00967040;IPI00965316	76.299	695	695;651;649;317;124;391	7.3678e-22	1.0734	1.1096	0.96985	1.0282	0.95617	0.90819
IPI00304612;IPI00398983;IPI00909017;IPI00398949;IPI00432865	23.577	203	203;203;144;142;102	4.1686e-75	0.98581	0.87269	0.92867	0.92073	0.95646	1.0151
IPI00911039	63.923	586	586	0	0.99003	1.0007	0.97158	0.99455	0.95666	0.97834
IPI00215790	8.2178	70	70	0.0021262	1.0797	0.87118	0.87596	0.92634	0.95733	1.0153
IPI00329572;IPI00909672	48.531	425	425;292	0.0010178	0.73768	0.77265	1.0121	1.0206	0.95733	0.91783
IPI00013068;IPI00796161;IPI00974080	52.22	445	445;172;226	4.7671e-10	0.97779	0.95657	0.93981	0.9086	0.95742	1.105
IPI00479786;IPI00855957;IPI00909344	73.114	711	711;710;364	3.5684e-82	0.90711	0.95234	1.033	1.0278	0.9578	0.96065
IPI00032830;IPI00217330	26.832	237	237;199	1.7862e-23	1.0205	0.89664	0.89401	0.9587	0.95803	1.0317
IPI00742682;IPI00514531	267.29	2363	2363;150	9.6809e-63	0.94111	0.95388	1.0243	0.98464	0.95829	0.9593
IPI00024095;IPI00964070;IPI00966427;IPI00966703;IPI00964340	36.375	323	323;284;154;134;104	7.5515e-51	0.96308	0.92895	0.96642	1.0185	0.95831	1.0072
IPI00220362;IPI00916763;IPI00916345;IPI00414878;IPI00938042	10.932	102	102;101;47;103;102	1.5139e-51	0.95781	0.8951	0.9658	0.97346	0.95835	0.94766
IPI00012079;IPI00942600;IPI00908588;IPI00798302;IPI00910983	69.725	616	616;616;587;572;368	1.088e-40	0.97493	0.99985	1.0262	0.93558	0.9584	0.99779
IPI00008524;IPI00410017;IPI00796945;IPI00909378;IPI00301154;IPI00794246;IPI00796139;IPI00556259;IPI00061206;IPI00306870	70.67	636	636;547;636;604;631;317;74;614;382;330	2.2302e-163	0.99857	0.94077	0.97259	0.9568	0.95889	1.0541
IPI00789159;IPI00793523;IPI00794894;IPI00021266;IPI00176755;IPI00397695;IPI00788093;IPI00604435;IPI00787625	21.916	194	194;158;158;156;156;155;156;130;52	1.635e-130	0.97446	0.97728	0.99471	0.98797	0.95889	1.0096
IPI00007052	16.937	152	152	1.1321e-05	1.0096	1.0084	1.0122	1.012	0.95899	0.98147
IPI00006213;IPI00795923;IPI00953308;IPI00941597	228.53	2024	2024;1969;1969;1859	0.0010396	1.1905	0.939	0.87459	0.90777	0.95943	1.1478
IPI00465132;IPI00399318;IPI00399319	34.482	308	308;257;256	7.1645e-23	1.0249	1.0178	0.99292	1.0112	0.95956	0.94241
IPI00646493;IPI00295857	139.32	1233	1233;1224	1.7973e-72	1.0866	0.99897	0.86284	0.9599	0.96	0.99354
IPI00465028;IPI00797270;IPI00796633;IPI00451401	30.791	286	286;249;210;249	0	0.98205	0.98919	1.007	1.025	0.96013	0.98223
IPI00007765;IPI00922694;IPI00966238;IPI00966795	73.68	679	679;632;95;62	0	1.0011	0.96633	0.97481	0.96818	0.96018	1.0219
IPI00009904;IPI00852792	72.932	645	645;166	1.928e-181	1.0006	0.98368	0.98841	0.96566	0.96035	1.044
IPI00303868;IPI00008867;IPI00157144	83.785	737	737;703;673	0.0018502	1.3092	1.0696	0.80934	1.0453	0.9604	0.93656
IPI00029056;IPI00640051;IPI00640517;IPI00644973	42.91	392	392;321;166;92	0.00063553	1.017	1.0305	1.0092	1.0828	0.96052	0.97911
IPI00007188;IPI00010420;IPI00455148	32.852	298	298;315;72	0	0.97973	0.9803	0.95701	0.97907	0.96059	1.007
IPI00013004;IPI00216320;IPI00418202;IPI00791490	35.102	312	312;284;272;259	0.0041509	0.90817	1.2122	1.3646	1.3904	0.96059	0.89088
IPI00291510;IPI00925196;IPI00924999;IPI00795859;IPI00791628;IPI00795143;IPI00375527;IPI00856084;IPI00442268;IPI00644730;IPI00940243;IPI00916697;IPI00945779;IPI00916378;IPI00647813;IPI00944992	55.804	514	514;470;279;244;197;96;599;589;566;563;530;522;513;509;489;289	1.1985e-296	0.97369	0.98292	1.0286	0.96092	0.96065	0.98616
IPI00007402	119.52	1038	1038	2.0212e-239	0.9429	0.94099	1.017	1.0131	0.96069	0.96625
IPI00015077	12.732	113	113	7.2213e-22	1.0719	0.84139	0.90777	0.90884	0.96074	1.0535
IPI00550746;IPI00647418;IPI00646767	38.242	331	331;211;209	1.9083e-170	0.98245	0.97526	0.97081	0.96408	0.96081	0.97855
IPI00031420;IPI00956601;IPI00964927	55.023	494	494;427;397	1.4723e-117	1.0171	0.96446	1.014	1.0079	0.96085	1.0175
IPI00006092	28.082	246	246	2.7599e-06	0.99837	0.93844	1.001	1.0376	0.96117	0.93225
IPI00299155;IPI00789638;IPI00790207;IPI00795606;IPI00792218;IPI00791083	29.483	261	261;237;235;230;190;174	5.6138e-10	1.0759	0.94039	0.92409	0.96312	0.96122	1.0135
IPI00140138	52.201	475	475	0.044634	0.99588	0.93681	0.9103	0.7867	0.96124	1.2115
IPI00007928	273.6	2335	2335	2.17e-29	0.97732	0.97747	0.98161	0.98615	0.96139	1.0428
IPI00396321;IPI00968169	34.93	307	307;191	6.7791e-138	0.95775	1.0121	1.0476	0.99274	0.96146	1.01
IPI00217975;IPI00790831	66.408	586	586;387	3.2561e-149	0.99236	0.9636	0.94657	0.98143	0.96157	0.99797
IPI00017303;IPI00893933;IPI00940797;IPI00940255;IPI00942418;IPI00783458;IPI00941267;IPI00783348;IPI00942143	104.74	934	934;921;586;485;410;341;865;214;721	3.8472e-35	1.0395	0.91221	0.92129	0.90201	0.96162	1.096
IPI00291205	124.98	1141	1141	0.0016475	0.89791	0.84445	0.97237	0.94673	0.9622	1.0191
IPI00002922;IPI00922336;IPI00925198;IPI00927546;IPI00927137;IPI00973122	55.594	514	514;376;142;76;73;55	2.4289e-05	1.2351	0.97941	0.78504	1.0396	0.96231	0.9441
IPI00247583;IPI00879165;IPI00845507;IPI00397713;IPI00399374;IPI00878451	18.565	160	160;134;160;141;160;62	1.3504e-61	1.12	0.95648	0.87109	0.80554	0.96235	1.1708
IPI00291922	26.411	241	241	1.1502e-132	0.98837	0.85409	0.98358	0.97365	0.96265	1.0117
IPI00902560;IPI00216026;IPI00455531;IPI00024145;IPI00917420;IPI00647902;IPI00647442;IPI00844015	33.371	309	309;294;293;283;282;204;195;109	2.8015e-260	1.0083	0.88437	0.90005	0.94008	0.96318	0.97871
IPI00014898;IPI00186711;IPI00398002;IPI00398778;IPI00398777;IPI00398779;IPI00398775;IPI00420096;IPI00398776	531.78	4684	4684;4574;4570;4551;4547;4547;4533;4525;4515	1.0869e-274	0.97851	0.95719	0.97607	0.97081	0.9632	1.0028
IPI00871827;IPI00472171;IPI00030179;IPI00794746;IPI00878826	32.275	272	272;259;248;208;246	7.786e-91	0.98146	0.95304	0.98338	0.98968	0.9632	0.99835
IPI00215780	16.06	145	145	2.4004e-65	0.97577	0.96182	1.0153	0.94614	0.96326	1.0679
IPI00419373;IPI00455134;IPI00939124;IPI00909208;IPI00927677;IPI00927407;IPI00470658;IPI00927189;IPI00927894	39.594	378	378;356;344;323;318;285;269;96;116	6.0493e-149	1.0182	0.97432	0.91537	1.0012	0.96335	0.96837
IPI00216237	12.254	105	105	3.2445e-39	1.0357	1.0332	1.0113	1.0061	0.9635	1.0727
IPI00848328;IPI00647473;IPI00940312	35.904	320	320;168;470	0	0.98773	1.0229	1.0773	1.0714	0.96353	0.93851
IPI00026105;IPI00479510;IPI00973807;IPI00943320;IPI00479934;IPI00909685	58.993	547	547;523;503;143;140;121	1.7252e-07	0.97549	0.92059	0.99669	0.8901	0.96357	1.0125
IPI00000494	34.362	297	297	7.1229e-90	1.0546	0.97486	0.93331	0.89611	0.96378	1.0226
IPI00441498	29.819	257	257	5.5981e-84	0.93972	0.97604	1.0291	1.0125	0.9638	0.95461
IPI00792352;IPI00796462;IPI00795671;IPI00643041;IPI00795109;IPI00044779	26.409	236	236;234;233;216;128;109	7.207e-62	0.98359	0.92844	0.97422	0.90086	0.96383	1.0165
IPI00465315;IPI00917605;CON__P62894;IPI00176698	11.749	105	105;101;105;105	2.605e-23	1.2203	0.99166	0.87012	0.89844	0.96426	1.0572
IPI00056499	54.271	477	477	1.2413e-05	1.0313	1.0074	0.9591	0.98447	0.96431	0.99271
IPI00218733;IPI00789078	15.936	154	154;135	6.3072e-108	1.0209	0.95364	0.92189	0.98963	0.96452	1.049
IPI00023919;IPI00745502;IPI00555749;IPI00794839	45.626	406	406;398;345;217	5.8137e-18	0.98299	0.9805	1.0132	0.97595	0.96488	1.014
IPI00011913	30.84	305	305	5.6823e-88	1.0043	0.9226	0.90702	0.95407	0.96492	0.98635
IPI00024821;IPI00936088	34.577	310	310;95	6.3375e-05	1.0412	0.9096	0.89555	0.95716	0.96513	1.0091
IPI00845461;IPI00550523	63.381	568	568;541	1.4302e-07	1.0058	0.97418	0.95661	1.0495	0.96519	0.91697
IPI00215901;IPI00218988;IPI00922165;IPI00172460;IPI00921960;IPI00218989	26.477	239	239;232;224;202;192;131	3.2163e-58	1.0184	1.1188	1.0256	0.9914	0.96523	1.0514
IPI00004902;IPI00556451	27.843	255	255;346	1.1327e-47	0.96551	0.91933	0.99868	1.0029	0.96528	1.025
IPI00000873;IPI00893918;IPI00908612;IPI00788898	140.47	1264	1264;1264;676;288	2.0003e-06	1.2263	1.2026	0.90683	0.8105	0.96532	1.0898
IPI00872295;IPI00940898;IPI00883636;IPI00914849;IPI00924896;IPI00930266;IPI00910108;IPI00908556	43.855	393	393;393;327;327;327;327;270;121	0.0048781	0.97517	0.9172	0.98686	0.94778	0.96564	1.0287
IPI00550021;IPI00651660;IPI00877635;IPI00877999;IPI00878524;IPI00877787;IPI00878827;IPI00219335;IPI00943250	46.108	403	403;354;351;305;261;272;180;407;48	1.3846e-112	0.99107	0.91949	0.94731	0.87	0.96587	1.0676
IPI00216298;IPI00552768	11.737	105	105;85	1.7592e-22	1.0961	0.91308	0.84386	0.81364	0.96594	1.2078
IPI00301323;IPI00657846	75.406	670	670;214	2.0057e-13	1.084	1.0666	0.96851	0.93273	0.96648	1.1533
IPI00220739	21.671	195	195	9.4105e-69	1.0026	1.0922	1.1707	1.1853	0.96692	0.97828
IPI00307162;IPI00291175;IPI00910496;IPI00909711;IPI00384973	123.8	1134	1134;1066;491;327;222	0	1.0025	0.98752	1.0301	0.95869	0.96727	1.0027
IPI00784414;IPI00306436;IPI00412752	88.067	770	770;769;722	5.0921e-19	0.91935	1.003	1.2106	1.0304	0.96748	0.94419
IPI00465436	59.755	527	527	2.6031e-20	1.1075	1.074	0.98038	0.85003	0.96763	1.1699
IPI00917298;IPI00848331;IPI00026302;IPI00856058;IPI00916315;IPI00915795;IPI00917675;IPI00916572;IPI00878870	15.118	130	130;128;125;121;120;115;79;108;67	2.8445e-13	1.0233	1.0043	0.98038	0.97853	0.96773	1.0021
IPI00219156;IPI00794121;IPI00790695;IPI00794745	12.784	115	115;96;51;56	1.5359e-144	1.1077	0.89575	0.83763	0.77025	0.96791	1.0507
IPI00376798;IPI00746438;IPI00647674;IPI00647168;IPI00878431	20.252	178	178;177;174;131;128	1.5514e-81	1.0031	0.97581	0.96788	0.99023	0.96792	0.94334
IPI00744711;IPI00894110;IPI00892880	85.95	783	783;537;139	5.396e-09	1.067	0.96941	0.96642	0.92976	0.9692	1.0128
IPI00012535	44.868	397	397	4.8774e-05	1.0062	1.0036	1.0337	1.0316	0.96935	0.99542
IPI00020984;IPI00941747;IPI00964308;IPI00477719;IPI00442866;IPI00966898;IPI00383227;IPI00964865;IPI00967621;IPI00966032;IPI00964989;IPI00967973;IPI00965725	71.502	627	627;592;170;276;327;308;272;168;134;190;137;131;107	1.4883e-91	1.0062	0.96081	0.95035	0.87998	0.96959	1.0793
IPI00220766	20.777	184	184	2.4426e-68	0.98472	0.96221	0.91949	0.97711	0.9696	1.0659
IPI00003377;IPI00916448;IPI00917346;IPI00744364;IPI00939530	27.366	238	238;235;226;165;137	1.2519e-05	0.97966	1.0689	1.0114	1.0721	0.9698	0.99294
IPI00025252;IPI00847663;IPI00790740;IPI00893541	56.782	505	505;461;147;123	0	1.0105	0.99385	0.99454	1.0147	0.96984	0.98676
IPI00013122	44.468	378	378	2.9085e-181	0.9848	1.0499	0.89313	1.0078	0.97054	1.0164
IPI00306017;IPI00941221;IPI00910192;IPI00914573	61.345	554	554;518;482;439	8.0518e-09	0.9988	0.98364	0.97933	0.99405	0.97063	0.9973
IPI00300371;IPI00828110	135.58	1217	1217;399	1.3351e-22	1.2042	0.90796	0.7686	0.89991	0.97067	1.1071
IPI00910997	21.4	199	199	0.00023956	1.0598	0.68125	0.74613	1.3755	0.97071	0.66905
IPI00290460;IPI00921947;IPI00885107	35.611	320	320;144;122	6.6424e-33	0.96625	0.93509	0.94418	0.98356	0.97107	0.98862
IPI00026781	273.42	2511	2511	0	1.0881	1.0222	0.9375	0.96971	0.97184	1.0885
IPI00479186;IPI00941899;IPI00220644;IPI00910979;IPI00909560;IPI00847989;IPI00888126;IPI00604528	57.936	531	531;605;531;516;511;458;281;366	3.4559e-201	1.0093	1.0108	0.99056	0.99016	0.97193	0.99908
IPI00018931	91.706	796	796	1.8084e-09	0.98815	0.92482	0.96476	0.98769	0.97227	1.0301
IPI00456969;IPI00440177	532.4	4646	4646;197	6.7185e-174	1.0482	1.1137	1.0393	1.1575	0.97265	0.89523
IPI00022628;IPI00939172;IPI00797162;IPI00942205;IPI00020771	87.023	771	771;749;734;712;677	0.00039201	1.0233	0.91893	0.8821	0.94237	0.97274	0.98136
IPI00290279;IPI00234368	40.545	362	362;345	1.6574e-06	0.91737	0.92857	1.031	0.96253	0.97348	0.98807
IPI00307200;IPI00903155	68.997	585	585;527	3.0117e-22	0.99918	0.85291	1.0001	0.9732	0.97362	0.97599
IPI00298994;IPI00219299	269.76	2541	2541;2542	3.621e-192	0.9963	0.9638	1.0149	1.0535	0.97398	0.94482
IPI00418313;IPI00298788;IPI00414335;IPI00556173;IPI00298789;IPI00219330;IPI00556364	95.807	898	898;894;764;706;702;690;450	1.4822e-106	1.004	0.98273	0.96743	0.98191	0.97487	1.0154
IPI00006379;IPI00411937;IPI00642697;IPI00917530	59.578	529	529;594;225;68	3.0031e-11	0.94363	0.79686	0.85985	0.95398	0.97491	1.1357
IPI00339384;IPI00910248	35.386	318	318;248	4.1086e-06	0.81394	0.80091	1.0052	1.0075	0.97508	0.98237
IPI00304925;IPI00845339;IPI00909073;IPI00643152;IPI00893099;IPI00939442;IPI00940023;IPI00830052;IPI00939526;IPI00941328;IPI00910047	70.051	641	641;641;417;705;641;641;583;560;238;232;232	0	1.0079	0.95747	0.91577	0.94683	0.97528	1.013
IPI00879750;IPI00017964;IPI00878876	18.829	175	175;126;120	1.6038e-05	1.0188	1.0265	1.0084	1.0604	0.97546	0.94415
IPI00305383	48.442	453	453	5.7883e-302	1.0436	1.0006	0.94305	1.0123	0.97555	1.1321
IPI00942869;IPI00182469;IPI00182540;IPI00219869;IPI00219872;IPI00419482;IPI00219868;IPI00219870;IPI00219873;IPI00940850;IPI00219875;IPI00845519;IPI00219725;IPI00219727;IPI00219730;IPI00219726;IPI00219728;IPI00219733;IPI00219731;IPI00219734;IPI00219732;IPI00219737;IPI00219739;IPI00219735;IPI00219738;IPI00219741;IPI00219742;IPI00219743;IPI00219744;IPI00219746;IPI00219748;IPI00219745;IPI00219747;IPI…	108.17	968	968;962;948;948;942;941;939;933;919;919;914;913;908;894;888;885;879;867;865;861;859;847;841;838;832;818;812;645;639;625;619;616;610;596;590	1.3661e-21	0.96851	0.92642	0.98921	0.97179	0.97613	0.94998
IPI00010404	10.135	86	86	2.566e-117	0.97743	0.95947	0.98593	0.92927	0.97614	1.0493
IPI00217223;IPI00815732;IPI00964123;IPI00963816	49.679	451	451;432;413;333	6.4957e-232	0.96198	0.90128	0.95128	1.0343	0.97626	1.0063
IPI00017895;IPI00719611	80.852	727	727;601	2.9236e-08	0.97912	0.97979	1.0311	0.95135	0.97634	0.96642
IPI00290110;IPI00240675;IPI00940614;IPI00647084	51.735	469	469;458;457;231	4.269e-74	1.0873	0.8614	0.92779	0.8054	0.97636	1.1777
IPI00940000;IPI00889541;IPI00651653;IPI00651677;IPI00947363;IPI00952778;IPI00879638	80.457	731	731;729;652;652;652;652;420	0	0.98319	0.85179	0.89306	0.93448	0.97691	0.92609
IPI00157790;IPI00639848	223.69	2017	2017;129	1.4278e-15	1.0668	1.021	0.95693	1.1039	0.97699	0.89215
IPI00291483;IPI00909541;IPI00289524;IPI00910990;IPI00455167;IPI00909130;IPI00887673;IPI00871915	36.853	323	323;138;323;297;220;146;139;126	1.4084e-164	0.9682	1.0367	0.9714	1.0189	0.97702	0.96966
IPI00004968	55.18	504	504	8.3037e-141	1.0466	0.94342	0.92549	0.89809	0.97713	0.99632
IPI00008167;IPI00787965;IPI00787149;IPI00944896;IPI00790573	31.512	279	279;265;71;89;52	3.0615e-33	1.0989	0.95988	0.93115	0.87992	0.97715	1.1061
IPI00410177;IPI00470835;IPI00929648;IPI00967729;IPI00644717;IPI00410178;IPI00410179;IPI00792984;IPI00383552;IPI00967420;IPI00220797;IPI00410180;IPI00410181;IPI00328526;IPI00745466	20.994	187	187;144;140;140;137;133;133;131;121;121;117;117;113;112;96	0.00050674	1.1341	1.0138	0.86946	0.94863	0.97718	1.0175
IPI00218962;IPI00297121	37.531	336	336;306	6.1197e-08	1.0146	0.92848	0.96557	1.0001	0.97721	0.92342
IPI00014439;IPI00902534	25.789	244	244;213	0.00041385	1.063	0.96059	0.9253	0.85904	0.97724	1.0962
IPI00553185;IPI00290770;IPI00552715;IPI00514032;IPI00513814;IPI00513703;IPI00514218	60.533	545	545;544;507;276;188;161;168	3.9732e-158	0.97924	0.92299	0.97241	0.99348	0.97782	1.0076
IPI00025698;IPI00892965;IPI00398922	77.885	686	686;629;199	2.6715e-22	1.304	1.3288	1.0642	1.1062	0.9779	0.84832
IPI00747810;IPI00163187;IPI00894286;IPI00894471	55.135	500	500;493;138;132	3.3493e-17	0.91264	0.99836	1.0915	1.022	0.9783	0.97331
IPI00219365;IPI00384282;IPI00922115	67.819	577	577;141;204	8.8531e-224	0.96551	0.9981	0.98223	0.90813	0.97836	1.0279
IPI00220301;IPI00910553	25.035	224	224;101	5.8469e-222	1.0631	1.0215	0.98409	0.96381	0.97836	1.0001
IPI00027107	49.874	455	455	2.8392e-160	1.0736	1.0136	0.87938	0.86964	0.97843	1.0863
IPI00007001;IPI00377233;IPI00333848	20.683	192	192;166;181	6.8005e-08	1.0105	0.97795	0.93437	1.0562	0.97868	0.97306
IPI00478410;IPI00395769	32.996	298	298;297	2.2573e-16	0.99484	0.78534	0.96282	0.90001	0.97877	1.2239
IPI00783271;IPI00917568;IPI00917844;IPI00917676;IPI00917975	157.9	1394	1394;531;504;359;77	0	0.99551	0.87114	0.93298	0.99468	0.97889	0.99378
IPI00031522;IPI00908351	82.999	763	763;260	0	1.013	0.96817	0.97092	0.93646	0.97918	1.0092
IPI00853009;IPI00034015;IPI00956101;IPI00218389;IPI00218388;IPI00410277;IPI00845479;IPI00845480;IPI00607544;IPI00853320;IPI00910773	55	512	512;486;485;483;482;521;521;508;490;488;159	1.5588e-88	0.965	0.87626	0.98535	0.98063	0.97925	1.0303
IPI00013452;IPI00909383	170.59	1512	1512;988	6.4875e-52	1.01	1.0308	0.99413	0.97974	0.97935	0.97357
IPI00554723;IPI00853161;IPI00646899;IPI00064765;IPI00853485;IPI00893680;IPI00894078;IPI00894025	24.604	214	214;214;163;214;181;131;108;91	1.2621e-93	0.98475	0.93385	0.97651	0.89957	0.97949	1.0462
IPI00003217	29.965	277	277	3.3543e-13	1.0506	1.0206	0.98961	0.94039	0.97951	1.1071
IPI00025273;IPI00218408;IPI00384624	107.77	1010	1010;433;101	2.8411e-299	1.0011	1.042	1.0375	1.0065	0.97986	1.0029
IPI00003925;IPI00549885;IPI00946404;IPI00798351;IPI00947129;IPI00947319;IPI00555722	39.233	359	359;341;341;317;350;251;164	1.8871e-05	1.1014	1.0885	0.9144	0.93203	0.98012	1.0488
IPI00011448	54.603	512	512	1.8478e-86	1.2422	1.0216	0.97134	1.1665	0.98019	1.0948
IPI00843975;IPI00872684;IPI00869155	69.412	586	586;586;200	0	1.0281	1.0222	0.95602	0.96384	0.98021	1.0187
IPI00102069	42.502	374	374	3.0489e-71	0.98051	0.98324	1.084	1.0546	0.98029	0.99649
IPI00008603;IPI00021428;IPI00023006;IPI00025416;IPI00922693;IPI00514530;IPI00414057;IPI00930343;IPI00921887;IPI00645534;IPI00917820	42.009	377	377;377;377;376;343;289;254;377;154;151;145	5.5399e-66	0.98467	1.024	1.0384	1.0644	0.98037	0.98615
IPI00026087;IPI00186338	10.058	89	89;86	1.807e-25	1.003	0.95126	0.91594	0.99158	0.98049	1.0338
IPI00004669;IPI00921824	64.732	571	571;265	1.1035e-41	0.8912	0.86638	1.0056	1.005	0.98064	1.008
IPI00169383;IPI00916818;IPI00909158;IPI00910974;IPI00219568;IPI00396468	44.614	417	417;327;281;161;417;338	0	1.0142	1.0024	1.0002	1.0087	0.98121	1.0239
IPI00016339;IPI00789439;IPI00017344;IPI00023510;IPI00927674;IPI00908835;IPI00924852;IPI00797838;IPI00927292;IPI00927919;IPI00063302;IPI00002919	23.482	216	216;178;215;215;201;174;111;65;62;61;199;198	7.8396e-19	1.0768	1.0971	1.0746	1.022	0.98138	1.0775
IPI00219446;IPI00795288;IPI00908746;IPI00795701;IPI00794584	21.057	187	187;196;155;65;44	1.0227e-77	0.98849	0.95432	0.96441	0.96722	0.98139	1.0325
IPI00216230;IPI00830089	75.491	694	694;248	6.4507e-59	1.0356	1.0015	0.9659	1.1314	0.98181	0.93338
IPI00027448	11.428	103	103	1.4935e-07	0.97678	1.0305	1.0711	1.0077	0.98206	0.98375
IPI00023704;IPI00793907;IPI00797120	65.746	612	612;465;428	6.5228e-07	0.97778	1.0201	1.05	1.0106	0.98211	0.9913
IPI00011200;IPI00642548	56.65	533	533;499	2.5523e-174	1.0046	0.942	0.95496	1.026	0.98224	0.96599
IPI00473136;IPI00953077;IPI00215948;IPI00973923	102.63	930	930;929;906;182	5.7168e-18	1.0537	1.2063	1.0415	0.93648	0.98246	0.95381
IPI00915363;IPI00029750;IPI00903204;IPI00915463;IPI00847986	32.43	289	289;133;132;132;130	4.1067e-37	1.1212	1.0256	0.90853	0.8938	0.98262	1.104
IPI00945940;IPI00911046;IPI00292827;IPI00947554;IPI00844141;IPI00182383;IPI00760722;IPI00012093;IPI00893500;IPI00893092;IPI00893361;IPI00893689;IPI00892997;IPI00894210;IPI00893536;IPI00892960	49.183	438	438;426;416;392;380;354;339;426;426;349;247;177;163;161;148;79	4.4404e-28	1.0013	0.96367	0.90521	0.96273	0.98307	0.99167
IPI00017596;IPI00910350;IPI00017597;IPI00553216;IPI00892961	29.999	268	268;238;281;266;218	7.3733e-38	1.0381	1.0261	0.99961	1.0261	0.98316	1.0145
IPI00302927;IPI00893358;IPI00921414	57.924	539	539;514;493	1.2865e-147	0.98863	0.90392	0.99588	0.98723	0.98339	1.0023
IPI00010796;IPI00878551;IPI00879437;IPI00911004	57.116	508	508;452;279;223	1.5919e-277	1.0179	1.0249	0.97652	0.95699	0.98351	1.0274
IPI00465044	56.084	522	522	9.8696e-36	0.97323	1.0946	1.0998	0.97899	0.9837	1.0383
IPI00022228;IPI00894287;IPI00443983;IPI00894047;IPI00893650;IPI00442135;IPI00893741;IPI00893636;IPI00892548;IPI00892886;IPI00893773;IPI00893433;IPI00894070;IPI00893483;IPI00892788;IPI00894200;IPI00893806;IPI00894372;IPI00893626;IPI00941714;IPI00893892	141.45	1268	1268;1235;847;757;333;577;267;221;164;147;141;128;126;126;96;82;81;79;69;54;47	4.0028e-75	0.99665	0.9878	1.0016	0.98555	0.98406	0.95294
IPI00021570;IPI00640567;IPI00006362	16.368	148	148;141;139	2.9119e-78	0.98629	1.002	1.0219	0.97179	0.98429	1.0278
IPI00018813;IPI00743825	52.404	450	450;443	4.441e-05	0.89726	0.62743	0.67362	0.99803	0.98434	0.89528
IPI00442073	20.567	193	193	0	1.0285	1.0285	0.97551	0.94754	0.98438	1.0245
IPI00028888;IPI00220683;IPI00220684;IPI00220685;IPI00903278;IPI00915340;IPI00964648;IPI00965952;IPI00967562;IPI00963980;IPI00968092	38.434	355	355;336;306;287;286;281;261;221;112;155;92	5.0389e-30	1.0027	0.9319	0.97636	1.0118	0.98439	0.92789
IPI00013917	14.515	132	132	1.5379e-123	0.9951	0.95369	0.98713	0.98159	0.98444	1.0451
IPI00293533	53.254	522	522	0.00049514	0.91047	0.93054	1.0268	0.98631	0.98455	0.92891
IPI00938079;IPI00246058;IPI00797599;IPI00942087;IPI00943244;IPI00924996;IPI00926014;IPI00924740;IPI00925321;IPI00798229	96.771	873	873;868;271;238;238;95;153;78;72;58	1.2192e-142	1.038	0.94546	0.952	0.99957	0.98464	1.0604
IPI00001159	292.75	2671	2671	6.9762e-75	1.0134	1.0622	1.0629	1.0082	0.98471	1.0185
IPI00019927	37.025	324	324	0.0001167	1.0181	1.0894	0.92654	1.1123	0.98488	0.98186
IPI00216694;IPI00947227;IPI00908503;IPI00947454;IPI00010471;IPI00032304;IPI00646259	70.81	630	630;603;254;190;627;629;246	0	1.0213	0.98396	0.92214	0.98428	0.98519	0.99433
IPI00012585;IPI00967527;IPI00963880;IPI00964815	63.111	556	556;331;202;170	4.8516e-05	1.0885	0.9861	0.99106	1.0164	0.98519	1.0296
IPI00549467;IPI00945908;IPI00791300	30.608	276	276;266;149	4.2859e-06	0.97698	0.90667	1.0546	0.98257	0.98522	1.0024
IPI00140420;IPI00910438;IPI00945024	102	910	910;889;231	1.8792e-56	1.0088	0.96312	0.95735	1.0531	0.98548	1.0072
IPI00956015;IPI00000634;IPI00807498	65.916	585	585;474;334	4.337e-07	1.0002	1.0204	1.0336	0.99762	0.98563	0.99535
IPI00216319;IPI00794254	28.218	246	246;233	5.5235e-122	1.033	1.0129	1.1188	1.0009	0.98575	1.0479
IPI00921422;IPI00028275;IPI00472887	226.25	2039	2039;2032;1972	5.1609e-17	1.8	0.80609	0.75169	0.95591	0.98597	1.1642
IPI00935311;IPI00792837;IPI00013457;IPI00219759;IPI00788670;IPI00219760;IPI00925888	53.008	497	497;494;478;463;447;395;358	1.1076e-08	0.99265	0.94812	0.93599	0.89702	0.98617	0.9944
IPI00013877;IPI00216492;IPI00216493	36.926	346	346;331;297	0.00036501	1.069	0.98447	0.98571	1.0404	0.98671	0.9913
IPI00644712;IPI00893062;IPI00889791;IPI00893179	69.842	609	609;559;568;557	7.3027e-96	1.0446	0.99468	0.96165	0.96394	0.98677	1.0146
IPI00828189;IPI00947458;IPI00411680;IPI00922359;IPI00945247	30.358	286	286;285;227;192;96	0.00058872	0.99327	0.93765	0.93636	1.0325	0.98686	1.0254
IPI00021417;IPI00910253	90.254	800	800;250	1.5661e-40	0.83671	1.1705	1.1868	1.0072	0.98688	1.1571
IPI00783750;IPI00216616;IPI00807702	71.863	636	636;635;572	4.2628e-05	0.82037	0.98967	1.099	0.73738	0.98705	1.361
IPI00010720;IPI00964079;IPI00965269;IPI00964855;IPI00965722;IPI00940257;IPI00909956;IPI00964998;IPI00966038;IPI00966991	59.67	541	541;520;503;515;514;448;283;124;62;44	5.4946e-154	1.0341	0.97025	0.97805	0.94502	0.98711	1.0828
IPI00642904;IPI00012726;IPI00555747;IPI00642944;IPI00885166;IPI00973757;IPI00644016;IPI00641299	72.39	660	660;644;631;615;428;281;129;208	5.1364e-224	1.0092	1.0084	1.0426	0.97376	0.98718	1.0514
IPI00333015;IPI00005614;IPI00328230	251.39	2155	2155;2364;2168	1.0379e-48	0.97406	0.93236	1.1291	0.94931	0.98724	0.9956
IPI00008557	63.48	577	577	1.2635e-13	1.0395	0.91047	1.0014	1.1194	0.98727	0.93986
IPI00186290;IPI00909570;IPI00440662	95.337	858	858;566;151	0	0.99976	0.96067	0.97292	0.99858	0.9873	1.0127
IPI00871851;IPI00014177;IPI00894340;IPI00893658;IPI00893645;IPI00894199;IPI00893096;IPI00892810;IPI00893902;IPI00894322;IPI00892518;IPI00892932;IPI00894055;IPI00894283;IPI00893477;IPI00893240;IPI00893788;IPI00894088;IPI00893329	45.46	396	396;361;321;188;184;173;148;147;139;131;129;105;161;121;94;80;72;52;50	2.2893e-93	1.1002	0.93118	0.91171	0.94079	0.98737	1.0065
IPI00642816	10.112	86	86	3.1025e-29	1.0358	0.92645	0.93393	0.9226	0.98745	1.0562
IPI00307092;IPI00014238;IPI00445108	71.496	625	625;597;424	5.6097e-16	1.0194	1.0093	0.97272	1.0165	0.98763	0.9451
IPI00872028;IPI00292771;IPI00006196;IPI00030136	238.86	2121	2121;2115;2101;979	1.686e-61	0.97521	1.0996	1.1067	1.0031	0.98781	0.92114
IPI00105598;IPI00790498	47.534	423	423;160	1.2911e-197	0.98322	0.94552	0.97847	1.0275	0.98803	0.92218
IPI00641788;IPI00013396	19.687	180	180;159	9.3234e-19	0.92064	1.1039	1.1021	0.91033	0.98817	1.0755
IPI00297477	28.415	255	255	3.3437e-14	1.1134	1.0035	0.99266	0.95032	0.98817	1.0388
IPI00873223;IPI00329331;IPI00939504;IPI00395676;IPI00946647;IPI00946873;IPI00945447;IPI00945562;IPI00945711;IPI00946068;IPI00944947;IPI00946012	57.791	517	517;508;508;497;213;175;171;161;150;135;131;105	1.7608e-18	1.079	1.0232	0.91884	1.0108	0.98818	0.97076
IPI00743293;IPI00398795;IPI00412154;IPI00028946	112.61	1032	1032;1013;255;236	1.179e-16	1.0621	0.88844	0.83592	0.79177	0.98819	1.137
IPI00221088;IPI00925580;IPI00879238;IPI00478327;IPI00647546;IPI00847192;IPI00853062;IPI00879512	22.591	194	194;156;139;194;139;113;79;77	1.3959e-126	0.98983	0.95843	0.96855	0.92946	0.98887	1.0651
IPI00019755;IPI00642936;IPI00513927	27.566	241	241;200;180	8.4755e-34	1.008	0.99691	0.95799	0.95339	0.98906	1.0237
IPI00514649;IPI00289601;IPI00013774;IPI00972999;IPI00910637;IPI00974336;IPI00964796	24.544	211	211;582;482;458;237;109;103	2.1782e-33	1.0202	1.0065	1.0167	0.83889	0.98913	1.1528
IPI00031517	92.888	821	821	2.3659e-209	1.02	0.99041	0.90875	1.0498	0.9892	0.90334
IPI00002535	15.649	142	142	3.2786e-08	0.91282	0.96273	0.99715	1.0164	0.9893	0.99552
IPI00880007;IPI00396171;IPI00888475;IPI00878314;IPI00220113;IPI00927819;IPI00411375;IPI00924603;IPI00743873;IPI00878651;IPI00043863;IPI00927173;IPI00910596;IPI00926984;IPI00333281;IPI00925569;IPI00877773;IPI00902552	245.44	2297	2297;1152;1135;1041;979;810;887;817;716;328;828;443;249;290;187;118;116;99	7.8729e-134	1.0355	1.0231	0.96256	0.96312	0.98961	0.98555
IPI00328744;IPI00290928;IPI00926935;IPI00748145;IPI00217269;IPI00220281;IPI00220578;IPI00248911;IPI00337415;IPI00398700;IPI00218488	44.279	381	381;377;366;355;354;354;354;354;354;354;350	2.6208e-06	1.0261	1.0514	0.98742	1.0231	0.99055	0.98808
IPI00219678	36.112	315	315	6.3111e-54	0.96869	1.0128	0.9703	1.0441	0.99061	0.97459
IPI00783097;IPI00915808	83.165	739	739;685	7.2933e-39	1.0796	1.1583	1.0457	1.049	0.99074	0.93719
IPI00306516	51.355	452	452	3.6193e-05	1.0459	1.0871	1.0283	1.0561	0.99104	0.90585
IPI00219420	141.54	1217	1217	1.629e-21	0.98415	0.91747	0.96978	0.94485	0.99123	0.98511
IPI00027230;IPI00939289;IPI00910360;IPI00556482;IPI00556538	92.468	803	803;553;163;453;399	0	0.99183	0.9824	0.98809	0.97685	0.99133	1.0297
IPI00003362	72.421	655	655	0	1.0129	1.0199	1.0363	1.0138	0.99175	1.0428
IPI00852685;IPI00936125;IPI00973154;IPI00935307;IPI00924442;IPI00884341;IPI00936881	141.35	1272	1272;1272;1269;1263;1260;1248;1248	7.0605e-113	1.0107	0.91577	0.91718	0.85439	0.99176	1.1265
IPI00005087	39.594	352	352	1.5089e-29	0.97932	1.05	1.0156	0.86672	0.99235	1.0955
IPI00644127;IPI00910980;IPI00903065;IPI00514082;IPI00514385;IPI00644832	144.5	1262	1262;1055;330;170;229;174	9.9417e-56	0.97935	1.0046	1.0365	1.0221	0.99265	1.0264
IPI00643920;IPI00942979;IPI00792641;IPI00940673;IPI00793119;IPI00946864;IPI00789310;IPI00946973;IPI00788802	68.741	631	631;623;540;457;358;334;339;153;20	0	1.0223	1.0051	0.97531	0.96292	0.99339	1.0573
IPI00032140;IPI00910487	46.44	418	418;397	1.3333e-63	0.98578	0.99366	0.95592	1.0126	0.99432	0.97745
IPI00334159	26.535	233	233	6.6505e-06	1.0167	1.0866	0.98084	0.99584	0.99442	1.0403
IPI00299254	138.83	1220	1220	1.6716e-46	0.99658	0.97869	0.9779	1.0048	0.99444	0.87201
IPI00306369;IPI00966877;IPI00966946	86.47	767	767;732;202	6.7869e-53	0.99865	0.99398	1.0116	1.0815	0.99464	0.98443
IPI00006099	145.81	1282	1282	2.4109e-05	0.9399	0.9084	1.0902	0.99315	0.99505	0.93861
IPI00021785	13.696	129	129	9.4001e-10	0.95813	0.98589	1.0218	0.95253	0.9951	0.99273
IPI00215777;IPI00790115;IPI00022202;IPI00788624;IPI00793177;IPI00791315;IPI00792029	39.958	361	361;361;362;272;215;189;100	3.3913e-111	0.92803	1.057	1.0944	0.98089	0.99514	0.98559
IPI00015602;IPI00793189	67.454	608	608;233	2.8222e-24	0.98238	0.97853	0.90322	0.91977	0.99519	1.0475
IPI00456940	28.661	246	246	4.0478e-20	1.0094	1.2254	1.2776	0.93138	0.99521	1.0756
IPI00009342;IPI00328905;IPI00299048;IPI00968174;IPI00871809;IPI00965765;IPI00967610	189.25	1657	1657;1631;1575;1402;1071;1071;509	8.4078e-192	0.99773	0.97557	0.92584	1.0256	0.99522	0.99524
IPI00879004;IPI00478232;IPI00218753;IPI00414101	182.68	1612	1612;1568;1567;1557	1.9641e-31	0.90968	0.99793	1.0731	1.0652	0.99543	0.98885
IPI00900293;IPI00289334;IPI00477536;IPI00943563;IPI00382697;IPI00953109;IPI00940093;IPI00945610;IPI00382698;IPI00382699;IPI00798140;IPI00178352;IPI00413958;IPI00945771;IPI00798186	281.63	2633	2633;2602;2591;2578;2561;2537;2422;2409;2150;2146;1053;2725;2692;72;113	0	1.0026	0.9805	1.0074	0.98427	0.99544	1.0238
IPI00217563;IPI00217561;IPI00217562;IPI00549336;IPI00293305;IPI00945878;IPI00945037;IPI00947385;IPI00946209	88.414	798	798;825;819;801;789;163;152;136;98	3.7752e-14	0.96818	1.041	1.1085	1.0718	0.99546	0.92326
IPI00021808;IPI00967106;IPI00908779;IPI00965198;IPI00910697;IPI00911023;IPI00909075;IPI00940549	57.41	509	509;489;469;449;435;395;320;314	1.4428e-14	1.0099	1.1469	1.0974	1.2247	0.99565	0.90851
IPI00019502;IPI00395772;IPI00742780;IPI00873982;IPI00790503;IPI00479307;IPI00743857;IPI00397526;IPI00020501;IPI00744256;IPI00024870;IPI00556012;IPI00926581;IPI00941217;IPI00607818;IPI00337335;IPI00878695;IPI00607778;IPI00029818	226.53	1960	1960;1382;563;2029;1997;1992;1979;1976;1972;1945;1938;218;2036;2028;2003;1995;103;1779;1478	0	0.98789	0.95849	0.97517	0.99648	0.9961	1.0155
IPI00176398	95.109	841	841	0.0023669	0.99646	0.99421	0.96941	0.95494	0.99636	1.0555
IPI00012462;IPI00902564;IPI00945725;IPI00845305;IPI00945881;IPI00946890	67.851	609	609;585;560;524;237;158	2.5317e-37	0.97125	1.0391	1.0268	1.0343	0.99643	0.9619
IPI00218236;IPI00892668;IPI00894333	37.186	327	327;138;125	2.3303e-170	0.97987	0.9116	0.91495	0.9428	0.99674	1.1254
IPI00003918;IPI00795303;IPI00908662;IPI00878133;IPI00953651;IPI00908376;IPI00794736;IPI00793341;IPI00794087;IPI00792159	47.697	427	427;414;250;230;78;151;108;106;65;103	0	1.0129	1.0181	0.96227	0.94531	0.99684	1.0415
IPI00377261;IPI00063245;IPI00942585	61.64	572	572;321;261	1.9269e-60	0.978	1.0173	1.0682	1.0853	0.99721	0.87404
IPI00419880;IPI00472119;IPI00967641;IPI00967073;IPI00964983;IPI00966860;IPI00968146;IPI00965772;IPI00966516;IPI00967388;IPI00967897;IPI00736161;IPI00963912;IPI00965481	29.945	264	264;264;208;227;223;205;194;190;145;125;95;149;101;65	2.3235e-135	1.0352	1.0177	0.91439	0.95605	0.99727	1.0964
IPI00156689	41.92	393	393	3.8766e-37	1.0095	1.0461	1.0729	1.0832	0.99753	0.98841
IPI00910593;IPI00015262;IPI00398735;IPI00910272;IPI00969497	35.943	330	330;309;270;288;284	5.6187e-05	0.96031	1.0946	1.1546	0.98137	0.99804	1.0051
IPI00069750;IPI00100716;IPI00856076;IPI00797595;IPI00855912;IPI00788826	59.875	559	559;542;530;516;513;499	3.1413e-16	0.94821	1.0738	1.0396	1.0711	0.99817	0.9163
IPI00290204;IPI00219483;IPI00219485;IPI00219484	51.556	437	437;428;341;166	1.9863e-16	1.0335	1.0536	0.95511	1.0022	0.9982	0.98372
IPI00216975;IPI00010779;IPI00910322	32.722	284	284;248;154	0	1.0196	0.91102	0.95545	0.97346	0.99848	0.99652
IPI00027175;IPI00414264;IPI00946099;IPI00925997	21.676	198	198;183;155;158	1.3329e-254	0.97464	0.97517	1.047	0.99247	0.99883	1.0176
IPI00021812;IPI00555610	629.09	5890	5890;2960	0	1.018	0.98326	0.97657	0.9859	0.99889	1.0226
IPI00219078;IPI00969023;IPI00177817;IPI00747443;IPI00914019;IPI00024804;IPI00396118;IPI00872163;IPI00218442;IPI00303760;IPI00004092;IPI00218440;IPI00748794;IPI00478023;IPI00646947	114.76	1042	1042;999;997;997;1015;1001;994;844;1052;1052;1043;1029;999;998;869	2.4509e-37	0.96835	1.0487	1.0576	0.98511	0.99897	1.0763
IPI00021435;IPI00879409;IPI00927053	48.633	433	433;249;130	1.6221e-46	1.0373	1.0452	1.0107	0.935	0.99917	1.0458
IPI00011603	60.977	534	534	1.0413e-16	1.0408	1.0542	1.0275	0.93367	0.99925	1.0777
IPI00853369;IPI00852623;IPI00853087;IPI00852734	205.12	1838	1838;1266;281;253	1.1316e-12	0.88706	1.0713	1.1809	1.1775	0.99943	0.88755
IPI00465248;IPI00759806;IPI00216171;IPI00791564;IPI00792715	47.168	434	434;341;434;391;341	0	1.0255	0.9888	0.95798	0.93262	0.99956	1.0732
IPI00025874;IPI00793589;IPI00945851	72.777	646	646;581;121	0	1.0193	1.0346	0.94491	0.9308	1	1.0573
IPI00302850;IPI00943813;IPI00974469;IPI00647160	13.281	119	119;119;119;78	1.0926e-05	1.0728	1.0166	0.86612	0.91784	1.0001	1.0224
IPI00221106;IPI00477803	100.23	895	895;799	1.9206e-39	0.94577	1.0595	1.2324	1.0225	1.0002	0.97035
IPI00301082	34.342	309	309	0.00066438	1.0904	1.0205	0.95159	1.0929	1.0003	0.86636
IPI00300074	66.115	589	589	4.8248e-20	1.0028	0.9332	0.94689	0.91253	1.0004	1.0672
IPI00479877	56.291	518	518	6.3677e-41	0.97261	0.99283	0.99311	1.0135	1.0004	1.0231
IPI00024067;IPI00455383;IPI00022881;IPI00300446;IPI00385931	191.61	1675	1675;1639;1640;1583;93	3.5018e-259	0.98966	1.027	1.0442	1.0442	1.0008	0.95658
IPI00328319;IPI00877934;IPI00645329;IPI00877802;IPI00645757;IPI00974561	47.655	425	425;424;410;390;220;87	3.8907e-300	1.0358	0.95697	0.95507	0.90408	1.001	1.0677
IPI00007694;IPI00412156;IPI00943255;IPI00921280	42.315	386	386;199;199;161	1.9291e-27	1.0607	1.0691	0.93279	1.0716	1.0013	0.9723
IPI00401264	46.971	406	406	0.0030178	1.0698	0.86493	0.89528	0.95775	1.0015	0.9545
IPI00219077;IPI00514090;IPI00793812;IPI00794758;IPI00790872	69.284	611	611;537;508;293;213	1.5122e-15	0.94487	1.0371	1.1023	1.1594	1.0016	0.89695
IPI00010896;IPI00877596	26.922	241	241;162	2.1749e-281	0.97911	1.017	1.0671	0.99944	1.0017	0.99242
IPI00147874	40.307	359	359	1.3692e-10	0.99342	1.0037	1.0327	1.1132	1.0018	0.97778
IPI00790739;IPI00017855	87.819	805	805;780	2.5378e-07	0.99444	1.2548	1.1955	1.0959	1.0024	0.91089
IPI00012382;IPI00029267	31.279	282	282;225	0.00085132	1.0806	1.0111	0.93567	0.9544	1.0025	1.0406
IPI00015954;IPI00002149;IPI00966157;IPI00968137;IPI00644667;IPI00513941;IPI00964410	22.367	198	198;198;170;144;121;117;103	2.3833e-29	1.0498	0.9333	0.95161	0.98622	1.0025	1.0786
IPI00413732;IPI00465432;IPI00941810;IPI00329352;IPI00333985;IPI00872411	139.38	1267	1267;1267;1267;1222;1222;1222	1.9158e-23	1.0012	1.0114	0.94824	1.0105	1.0026	1.0366
IPI00479058	17.04	145	145	1.6912e-19	1.0744	1.1029	1.0384	0.98922	1.0027	1.0541
IPI00220416;IPI00790644;IPI00798386;IPI00974054	13.53	111	111;161;98;76	8.786e-09	1.0043	0.9153	0.92623	0.8853	1.0028	1.1129
IPI00783872;IPI00873926;IPI00910763	78.365	709	709;694;388	1.8678e-92	0.99585	0.95419	0.98799	0.95432	1.0028	1.0264
IPI00022442	17.417	156	156	1.8034e-21	0.98003	0.99689	0.98162	1.0271	1.0028	0.95798
IPI00965327;IPI00964764;IPI00305166;IPI00217143;IPI00902754;IPI00964725;IPI00895897	63.566	583	583;616;668;520;258;126;106	4.2344e-140	1.0196	1.0135	1.0191	1.017	1.0032	1.0053
IPI00554788;IPI00942338;IPI00795353;CON__P05784;IPI00794267;IPI00879559;IPI00745035;CON__H-INV:HIT000015463	48.057	430	430;418;96;423;167;155;133;295	4.575e-72	0.99782	0.99577	1.0031	1.0458	1.0034	0.9834
IPI00783982;IPI00966036;IPI00963959	97.717	874	874;76;69	1.6749e-188	0.97239	1.019	0.96653	0.96615	1.004	0.98279
IPI00000861;IPI00386803;IPI00952738;IPI00909481;IPI00883946;IPI00909678;IPI00909939	29.717	261	261;323;318;220;166;205;125	5.4224e-64	0.98331	0.96159	0.92217	0.94919	1.0042	1.0207
IPI00921118;IPI00759776;IPI00013508;IPI00909239	107.14	930	930;914;892;887	0	0.97441	0.97982	1.0602	0.99305	1.0042	0.98187
IPI00295386;IPI00795334;IPI00974490;IPI00909888	30.375	277	277;222;178;173	0	0.96104	0.97595	1.0373	1.0716	1.0046	0.93632
IPI00004273;IPI00924634;IPI00926163	100.18	843	843;300;294	1.4259e-17	1.0373	1.2461	1.2402	1.1065	1.0047	1.0343
IPI00028635;IPI00383680;IPI00552972;IPI00552146;IPI00936387;IPI00552307;IPI00941764	69.283	631	631;615;506;286;345;263;167	5.2828e-131	1.0043	1.043	1.01	0.95314	1.0053	0.99199
IPI00023004;IPI00232533;IPI00647118;IPI00074224;IPI00642387	16.442	144	144;144;127;144;116	5.3344e-24	1.027	0.97268	0.89676	0.91418	1.006	1.1417
IPI00480142;IPI00643885;IPI00179057;IPI00419273;IPI00935649;IPI00965290;IPI00549919	103.98	913	913;900;895;759;759;717;659	2.18e-13	1.0734	0.92118	0.93106	0.89918	1.0064	1.0262
IPI00012345;IPI00215879;IPI00556297	39.586	344	344;335;279	2.4037e-06	1.015	1.0409	1.0167	1.051	1.0064	1.0162
IPI00294536;IPI00941907;IPI00795518;IPI00796172	39.777	363	363;350;169;115	2.462e-134	1.0263	0.97954	0.98138	0.94453	1.0065	1.0205
IPI00012069;IPI00619898;IPI00619966;IPI00910902	30.867	274	274;240;240;202	1.4716e-117	0.99629	0.91093	0.86814	1.0255	1.0068	1.1166
IPI00798360;IPI00795769;IPI00014938;IPI00797742	18.306	162	162;460;210;41	6.0116e-14	1.0026	0.98808	0.97046	1.0043	1.0069	1.0258
IPI00009368;IPI00964267;IPI00964643	35.619	322	322;194;144	2.8793e-33	0.95476	0.99668	0.96366	0.97687	1.007	1.0317
IPI00304435;IPI00893815;IPI00894014	33.31	284	284;221;128	4.8004e-06	1.2661	1.0045	0.88793	1.4028	1.007	0.8127
IPI00180675;IPI00936821;IPI00179709;IPI00915791;IPI00410402;IPI00218345;IPI00952875;IPI00791613;IPI00646909;IPI00792478;IPI00478908;IPI00795002;IPI00784332	50.135	451	451;385;450;415;450;418;479;467;449;383;257;176;326	0	1.0154	1.0206	1.0029	0.93541	1.0072	1.1045
IPI00007334;IPI00946415;IPI00911038;IPI00215975;IPI00297991	151.86	1341	1341;1328;1301;614;583	4.8191e-27	0.92612	1.0137	1.0583	1.0355	1.0074	0.94062
IPI00007611;IPI00878218;IPI00789135;IPI00893479	23.277	213	213;213;191;74	6.8463e-22	0.96923	1.0531	1.089	1.0637	1.0074	0.99341
IPI00168388;IPI00102936	70.729	627	627;596	1.4825e-05	0.85343	0.94306	1.2079	1.1796	1.0076	0.93569
IPI00020127	68.137	616	616	8.3198e-14	1.0971	1.0241	0.94838	0.9727	1.0078	1.0018
IPI00000816;IPI00974544;IPI00793344;IPI00792761;IPI00795516;IPI00086909	29.174	255	255;233;193;139;107;263	0	1.024	1.0626	1.0832	1.0573	1.0079	0.98259
IPI00179298;IPI00456919;IPI00643153;IPI00445401;IPI00746059	482.14	4376	4376;4374;4365;4360;3408	2.6049e-07	1.0025	0.86502	0.9858	1.021	1.0082	1.0204
IPI00394838;IPI00021290;IPI00939422;IPI00935456	125.14	1145	1145;1101;1091;830	8.2503e-258	1.023	1.0308	0.97773	0.97838	1.0084	1.0056
IPI00889534;IPI00011062;IPI00397498;IPI00926403;IPI00926199	165.65	1506	1506;1500;1049;262;121	0	1.0097	1.0052	0.99817	0.97447	1.0085	1.0189
IPI00007423;IPI00759824;IPI00647001	28.787	251	251;195;156	1.8658e-121	0.99426	0.98461	0.99774	1.056	1.0085	1.0106
IPI00024915;IPI00759663;IPI00375306;IPI00375307	22.086	214	214;162;170;125	2.1532e-69	1.0158	1.0064	0.95623	1.0174	1.0087	0.99515
IPI00514856;IPI00181306;IPI00029019;IPI00946257	114.53	1087	1087;1068;983;976	2.9438e-23	0.95315	0.99831	1.0184	0.94407	1.009	1.0821
IPI00014589;IPI00216472;IPI00965502	25.19	229	229;211;125	1.1988e-08	0.96152	0.89685	0.90093	0.94561	1.0091	0.92626
IPI00893746;IPI00026167	14.627	132	132;128	3.8702e-42	0.95309	1.0198	0.9498	0.98706	1.0091	1.0273
IPI00215965;IPI00760620;IPI00465365;IPI00644968;IPI00797148;IPI00879501;IPI00797902;IPI00176692;IPI00908994;IPI00742127;IPI00789127;IPI00909288;IPI00869068;IPI00879258;IPI00926389	38.746	372	372;321;320;320;267;320;145;281;208;299;268;254;278;282;46	1.5956e-254	1.0248	0.96251	0.9837	0.97354	1.0093	1.0679
IPI00106491;IPI00908451	27.56	239	239;145	1.8043e-23	0.96175	0.94922	1.0321	1.0898	1.0093	0.91037
IPI00916503;IPI00916112;IPI00785096;IPI00918019;IPI00180128;IPI00917597;IPI00916463;IPI00915826;IPI00916588;IPI00903257	51.281	451	451;423;419;389;353;216;162;155;116;211	6.7146e-80	0.94783	0.96921	0.96008	0.85787	1.0096	0.98515
IPI00645078;IPI00908755;IPI00026119;IPI00641319;IPI00644183;IPI00552452;IPI00646990;IPI00647463;IPI00383182	117.85	1058	1058;603;506;284;271;234;195;173;135	1.9755e-185	1.0149	1.0877	1.0122	1.0142	1.0096	1.0258
IPI00009790;IPI00643196;IPI00642664;IPI00552290;IPI00552617	85.595	784	784;776;202;125;166	8.4827e-243	1.0711	0.96359	0.93268	0.95129	1.0099	1.036
IPI00930688;IPI00792677;CON__ENSEMBL:ENSBTAP00000016242;IPI00793930;IPI00873427;IPI00909762	50.151	451	451;416;451;335;437;182	0	0.99385	1.0252	1.0151	0.99729	1.0099	1.0196
IPI00007289;IPI00290380	59.519	550	550;532	1.768e-15	0.99758	0.98501	1.0332	0.93726	1.0102	1.0974
IPI00018350;IPI00878310;IPI00877948;IPI00555581;IPI00878587	82.285	734	734;733;691;418;412	7.8552e-09	0.99803	0.87938	0.91462	0.92821	1.0102	1.0773
IPI00027463	10.18	90	90	5.481e-33	1.007	0.96412	1.0069	0.98041	1.0104	1.1241
IPI00299402;IPI00909014	129.63	1178	1178;529	3.7172e-06	0.99339	0.93301	1.0125	1.1264	1.0108	0.89877
IPI00215911;IPI00792538	35.554	318	318;150	1.2957e-28	1.0025	0.97551	0.9913	0.95586	1.0112	0.91412
IPI00292657;IPI00642248;IPI00164901;IPI00643630	35.869	329	329;301;119;70	1.4518e-111	1.0013	0.95919	1.0368	0.88162	1.0113	1.0327
IPI00333541;IPI00302592;IPI00644576;IPI00553169;IPI00910863;IPI00552416;IPI00927825;IPI00657767;IPI00552858;IPI00893150	280.74	2647	2647;2639;2607;2315;678;480;591;307;281;90	0	1.0212	1.0792	1.0201	1.0475	1.0114	0.9859
IPI00003833	33.331	303	303	1.4788e-20	0.97959	1.0511	1.1107	1.2021	1.0114	0.90765
IPI00796366;IPI00335168;IPI00789605;IPI00930599;IPI00795576;IPI00793089;IPI00797626;IPI00413922;IPI00796500;IPI00795944;IPI00909366;IPI00027255;IPI00101961	26.707	238	238;151;151;145;116;115;102;97;92;73;223;208;151	4.408e-182	0.99957	1.0307	1.0656	1.0334	1.0116	0.98378
IPI00022744;IPI00219994;IPI00910737;IPI00910298;IPI00219762	110.42	971	971;945;762;569;195	9.3323e-288	1.0242	1.0268	1.004	0.9837	1.0117	1.0335
IPI00000877;IPI00922838;IPI00922127;IPI00922745	111.33	999	999;981;559;188	3.4261e-68	0.99446	0.9959	0.8863	1.0393	1.0117	0.93449
IPI00793696;IPI00306332;IPI00946221;IPI00791426;IPI00795548	19.41	168	168;157;150;121;67	2.2826e-38	1.0315	0.92893	0.94658	0.90552	1.012	0.99937
IPI00011126;IPI00848107;IPI00895901	49.184	440	440;294;244	1.1599e-11	1.0027	0.91197	0.98983	1.0301	1.012	0.95176
IPI00028031;IPI00178744;IPI00937735;IPI00793599;IPI00796120	75.209	701	701;679;678;321;213	9.4772e-38	1.0293	0.99851	0.9617	0.99702	1.0122	1.1327
IPI00218297;IPI00795913;IPI00913977	44.934	393	393;354;377	7.8243e-81	1.0361	0.99742	1.006	0.97297	1.0128	1.0115
IPI00216308;IPI00790304;IPI00847300;IPI00910830	30.772	283	283;184;251;156	8.7495e-149	0.98573	0.93354	0.96041	0.97923	1.013	1.0434
IPI00013214;IPI00940786	95.907	853	853;808	1.3747e-35	0.94575	0.92986	1.0137	1.0821	1.0133	1.1232
IPI00646839;IPI00016910;IPI00922360;IPI00910003;IPI00939953;IPI00873286	105.47	914	914;913;792;762;736;735	4.6388e-07	0.99121	0.98485	0.98324	0.98178	1.0134	1.0176
IPI00871535;IPI00879810;IPI00844215;IPI00843765;IPI00745092	285.09	2477	2477;2477;2472;2452;494	0	1.0074	1.0763	1.0354	1.1158	1.0135	0.94621
IPI00012772;IPI00797230;IPI00909884;IPI00795138;IPI00792050;IPI00795853	28.024	257	257;291;188;236;148;147	3.5074e-142	1.0051	1.0242	1.0616	0.99581	1.0136	0.992
IPI00554521	21.225	183	183	1.2372e-20	1.0796	1.0165	0.98799	0.9116	1.0141	1.0304
IPI00183508;IPI00385754;IPI00878175;IPI00816829;IPI00815767	43.917	384	384;369;265;252;357	1.2979e-14	1.0137	1.1473	1.0669	0.98299	1.0141	1.0491
IPI00026154;IPI00943074;IPI00792916;IPI00829824	60.134	535	535;528;525;181	1.0479e-116	0.94552	1.0435	0.98911	0.99859	1.0143	0.99696
IPI00013219;IPI00921075;IPI00922759	51.419	452	452;452;391	0.00037242	1.113	0.96108	0.87804	0.97569	1.0147	1.1048
IPI00007102;IPI00032575;IPI00745272;IPI00922891;IPI00909336	55.011	504	504;313;298;289;274	3.8364e-06	1.0073	1.0964	1.0693	1.0847	1.0147	0.96079
IPI00026271;IPI00742191	16.273	151	151;350	4.2364e-142	0.98976	1.003	1.0966	1.0396	1.0151	0.99744
IPI00290566;IPI00550591;IPI00844203	60.343	556	556;401;182	1.1874e-148	1.0107	1.0113	1.0213	1.0073	1.0153	1.0312
IPI00329801;IPI00964635;IPI00964913;IPI00967416;IPI00964365	35.936	320	320;276;260;220;163	1.0299e-119	1.0421	0.97313	0.93126	0.82658	1.0164	1.2088
IPI00011916;IPI00893993;IPI00893242	35.348	320	320;251;242	4.0912e-08	1.0988	0.84812	0.74711	1.237	1.0168	0.83935
IPI00017448;IPI00937239;IPI00387084;IPI00387085	9.1113	83	83;81;90;66	1.1477e-42	1.1255	1.1003	0.87769	0.83819	1.017	1.1945
IPI00025019;IPI00556291	26.489	241	241;196	1.4021e-105	0.99831	1.0799	1.0168	0.97071	1.0174	1.053
IPI00000875;IPI00937615;IPI00738381;IPI00909534;IPI00908389	56.149	487	487;437;437;206;208	1.5704e-150	1.0136	1.0667	1.0169	1.0492	1.0174	1.013
IPI00296053;IPI00759715	54.636	510	510;467	0	0.96143	1.0134	1.0212	1.035	1.0176	0.97467
IPI00027223;IPI00926055;IPI00925000;IPI00925864;IPI00927373;IPI00924576	46.659	414	414;173;157;141;74;62	3.0001e-23	1.0154	1.161	1.0839	1.0587	1.0177	0.93845
IPI00744851;IPI00746310;IPI00952829;IPI00179700;IPI00450855;IPI00177716	34.301	328	328;179;179;107;107;96	4.4858e-05	1.0341	0.98297	0.96389	0.96671	1.018	1.0171
IPI00412545;IPI00554681;IPI00946670;IPI00946103;IPI00946474	13.563	116	116;116;112;93;70	0.0018353	1.028	1.137	1.0308	1.154	1.018	0.93256
IPI00012066;IPI00790627;IPI00470509;IPI00796337;IPI00216689;IPI00791223;IPI00900327;IPI00788837;IPI00027970;IPI00410587;IPI00550365;IPI00167750;IPI00796442;IPI00410586;IPI00101278;IPI00795754;IPI00790019;IPI00789448	38.221	362	362;361;331;366;365;335;322;282;371;370;361;351;174;346;345;230;190;74	2.6622e-91	1.0046	1.107	1.0415	0.94892	1.0184	1.0194
IPI00925520;IPI00332371;IPI00940003	90.577	830	830;780;400	3.8162e-11	0.99887	1.3622	1.4479	1.0661	1.0186	0.97614
IPI00218606;IPI00965899;IPI00966986;IPI00968307;IPI00966370;IPI00793332;IPI00965062	15.807	143	143;134;134;123;85;143;55	1.6532e-49	0.9815	0.93705	0.94785	0.88745	1.0188	1.1531
IPI00000274	55.688	524	524	0.0031099	1.0004	1.017	0.98586	1.048	1.0189	1.0281
IPI00479191;IPI00013881;IPI00908896;IPI00964535;IPI00966018;IPI00963924;IPI00968132;IPI00967216;IPI00966932;IPI00965435;IPI00964846;IPI00967835;IPI00026230;IPI00940955;IPI00974526;IPI00964237;IPI00965156;IPI00923539;IPI00967535	51.229	472	472;449;429;212;184;172;171;168;164;163;162;130;449;404;155;84;49;355;40	2.6388e-10	1.0049	1.0092	0.98813	1.0107	1.019	0.98643
IPI00790305;IPI00291608;IPI00796456;IPI00060650	20.891	199	199;178;177;130	3.0692e-20	1.0541	1.0064	0.93625	0.90367	1.0193	1.1382
IPI00220834;IPI00871391	82.704	732	732;131	0	1.0113	1.005	1.0105	0.97885	1.0194	1.048
IPI00013808;IPI00969112;IPI00908458;IPI00908776;IPI00845465;IPI00942539;IPI00973960;IPI00032137;IPI00936352;IPI00019884;IPI00903019	104.85	911	911;692;562;417;521;342;944;901;901;894;133	0	1.0049	1.0326	1.0402	0.99556	1.0195	1.0298
IPI00003565;IPI00027699;IPI00552190;IPI00183104;IPI00647839	24.428	226	226;193;185;151;110	8.1413e-29	1.0425	1.0093	0.95889	0.89148	1.0198	1.0555
IPI00217030;IPI00219894;IPI00646114;IPI00302740;IPI00643830;IPI00945801;IPI00478986;IPI00877922	29.597	263	263;263;132;263;262;273;263;113	1.0523e-123	1.0314	0.9875	0.97986	0.97008	1.02	1.0427
IPI00218918;IPI00549413;IPI00908577;IPI00643231	38.714	346	346;204;172;115	0	1.0091	0.99687	1.0185	1.0536	1.02	1.0413
IPI00294779;IPI00031804;IPI00973955;IPI00973345	30.789	284	284;283;100;57	8.2222e-20	0.99412	1.0262	0.98963	0.99344	1.0201	0.98426
IPI00001734;IPI00930609;IPI00219478	45.355	415	415;370;324	7.3665e-50	1.0165	0.96421	0.98216	0.9915	1.0204	0.994
IPI00641181;IPI00936328;IPI00937223	19.529	195	195;221;221	6.9256e-42	1.0164	1.0272	0.9562	1.0192	1.0204	1.0275
[truncated: 509 more rows]

## Sheet: proteome_1_2_4_2_1(peptides)
Sequence	Missed cleavages	Mass	Proteins	Charges	PEP	Score	Ratio #3/#1 normalized	Ratio #5/#1 normalized	Ratio #5/#3 normalized	Ratio #2/#1 normalized	Ratio #4/#1 normalized	Ratio #4/#2 normalized
[truncated: 6,077 more rows]

[truncated: 2 more sheets: proteome_1_2_4_2_1(proteins), phosphoproteome_1_1_1_1_1(site)]
